# Supplementary material for: Direct photo-induced reductive Heck cyclization of indoles for the efficient preparation of polycyclic indolinyl compounds
Source: Royal Society of Chemistry journal article supplement (doi:10.1039/d1sc04258k), 2021-01-01
Supplement: d1sc04258k1.pdf [file d1sc04258k1.pdf]

## Electronic Supplementary Information

### Table of contents

|                                                                                                                                                                                |     |
|--------------------------------------------------------------------------------------------------------------------------------------------------------------------------------|-----|
| <b>Table of contents</b> .....                                                                                                                                                 | S2  |
| <b>General information</b> .....                                                                                                                                               | S3  |
| <b>Figure S1.</b> Reaction setup with cooling by running water.....                                                                                                            | S5  |
| <b>Figure S2:</b> Large-scale photoreactor (25 W, 365 nm LEDs) .....                                                                                                           | S5  |
| <b>Table S1:</b> Reaction condition optimization for the dearomatization of <b>S1</b> .....                                                                                    | S6  |
| <b>Scheme S1:</b> Structures of substrates used for examining the scope of photo-induced dearomatization reaction.....                                                         | S7  |
| <b>Scheme S2:</b> The use of [Ir(dF(CF <sub>3</sub> )ppy) <sub>2</sub> (dttbpy)]PF <sub>6</sub> as photocatalyst in photocyclization of N-(2-chlorobenzoyl)-5-bromoindole..... | S8  |
| <b>Quantum yield determination for photochemical reaction</b> .....                                                                                                            | S8  |
| <b>Figure S3:</b> Emission spectrum of <b>S1</b> in 2-MeTHF at 77 K and photos showing the afterglow.....                                                                      | S9  |
| <b>Figure S4:</b> Time-resolved emission spectra of <b>S3</b> in the solid state.....                                                                                          | S10 |
| <b>Figure S5:</b> Time-resolved emission spectra of <b>S3</b> in the solid state.....                                                                                          | S10 |
| <b>Figure S6:</b> ns-TA spectra of <b>S3</b> in degassed MeCN.....                                                                                                             | S11 |
| <b>Figure S7:</b> <sup>1</sup> H NMR spectra showing the incorporation of deuterium at C2 position...                                                                          | S12 |
| <b>EPR experiments</b> .....                                                                                                                                                   | S13 |
| <b>Figure S8:</b> EPR spectra of control experiments.....                                                                                                                      | S13 |
| <b>Figure S9:</b> X-band EPR spectrum of the reaction mixture after irradiation for 3 hours.....                                                                               | S13 |
| <b>Figure S10:</b> X-band EPR spectrum of the reaction mixture after irradiation for 3 hours, then trapped with DMPO.....                                                      | S14 |
| <b>Figure S11:</b> UV-Vis absorption spectra of <b>S1</b> , DIPEA and the mixture at room temperature.....                                                                     | S16 |
| <b>Figure S12:</b> Emission output of LEDs.....                                                                                                                                | S16 |
| <b>Scheme S3:</b> Synthesis of substrates.....                                                                                                                                 | S17 |
| <b>General procedure for metal- and photocatalyst-free photo-induced</b>                                                                                                       | S34 |

|                                                                                                                    |      |
|--------------------------------------------------------------------------------------------------------------------|------|
| <b>dearomatization reaction of indole derivatives.....</b>                                                         |      |
| <b>Modification of complex molecules.....</b>                                                                      | S45  |
| <b>Scheme S4: Synthesis of compound 26 .....</b>                                                                   | S45  |
| <b>Scheme S5: Synthesis of compound 28 .....</b>                                                                   | S47  |
| <b>Scheme S6: Synthesis of glioperazine C analogues.....</b>                                                       | S49  |
| <b>Scheme S7: Synthesis of compound 32 .....</b>                                                                   | S53  |
| <b>Large-scale reaction and its applications.....</b>                                                              | S56  |
| <b>Figure S13: X-ray crystal structure of compound <i>cis</i>-34.....</b>                                          | S58  |
| <b>Figure S14: X-ray crystal structure of compound 37.....</b>                                                     | S61  |
| <b>Mechanistic experiments.....</b>                                                                                | S65  |
| <b>Computational details.....</b>                                                                                  | S72  |
| <b>Figure S15: Calculated frontier molecular orbitals of S1 at T<sub>1</sub> State.....</b>                        | S72  |
| <b>Table S2: Mulliken charge distribution of S1 in the ground state (S<sub>0</sub>) and T<sub>1</sub> state...</b> | S72  |
| <b>Figure S16: Energy profile for the proposed reaction pathway.....</b>                                           | S73  |
| <b>X-ray crystallographic details.....</b>                                                                         | S85  |
| <b>NMR Spectra .....</b>                                                                                           | S99  |
| <b>References.....</b>                                                                                             | S188 |

### General information.

All chemicals, unless otherwise noted, were purchased from commercial sources and used without further purification. All solvents for reactions and measurement were purified by standard methods. <sup>1</sup>H and <sup>13</sup>C NMR spectra were recorded respectively on Bruker 400 M or 500 M spectrometers. <sup>19</sup>F NMR spectra were recorded respectively on Bruker 400 M spectrometers. <sup>1</sup>H NMR and <sup>13</sup>C NMR chemical shifts were determined relative to internal standard TMS at δ 0.0 ppm. Chemical shifts (δ) are reported in ppm, and coupling constants (*J*) are in Hertz (Hz). The following abbreviations were used to explain the multiplicities: s = singlet, d = doublet, t = triplet, q = quartet, m = multiplet, br = broad. All reactions were monitored by TLC or <sup>1</sup>H NMR spectroscopy. Flash column chromatography was carried out using 300–400 mesh silica-gel at medium pressure.

High resolution mass spectra were recorded using a Q Exactive mass spectrometer (Thermo

Fisher Scientific, USA. Gas chromatography-mass spectrometry (GC-MS) analyses were performed with an Agilent Technologies 7890A Network GC System equipped with an Agilent Technologies 5975C Network Mass Selective Detector (MSD).

All absorption spectra were recorded on a Hewlett-Packard 8453 diode array spectrophotometer. Steady-state emission spectra were recorded on a Horiba Fluorolog-3 spectrophotometer. Solutions for photophysical studies were degassed by using a high vacuum line in a two-compartment cell with five freeze-pump-thaw cycles. Low temperature (77 K) emission spectra for glassy state and solid state samples were recorded in quartz tubes (4 mm internal diameter) placed in a liquid nitrogen Dewar flask with quartz windows. Nanosecond time-resolved emission measurements were performed on a LP920-KS Laser Flash Photolysis Spectrometer (Edinburgh Instruments Ltd., Livingston, UK). The excitation source was the 355 nm output (third harmonic) of a Nd:YAG laser (Spectra-Physics Quanta-Ray Lab-130 Pulsed Nd:YAG Laser). The signals were processed by a PC plug-in controller with L900 software. Cyclic voltammetry was conducted on a Princeton Applied Research PMC-1000 Potentiostat. The working electrode was glassy carbon; the reference electrode was Ag/AgCl; the counter electrode was a platinum wire. Scan rate: 100 mV/s. All potentials were reported versus Ag/AgCl. Unless stated otherwise, irradiation was performed using 410 nm or 365 nm LEDs (3 W × 4) under argon atmosphere. The illumination instruments were purchased from Shenzhen PURI Materials Technologies Co., LTD (Model: PR-PCR2-365nm, PR-PCR2-410nm). The photon flux received by the reaction tube containing 5 mL of solution in the 365 nm LED photoreactor is estimated to be  $3.91 \times 10^{-6}$  einstein  $s^{-1}$ . Large-scale 365 nm LEDs photoreactor (Model: PR-PCRL1-365 nm) was also purchased from Shenzhen Purui Material Technology Co., Ltd.

Photoreactor: ( 3 W  $\times$  4, 410 or 365 nm LEDs)

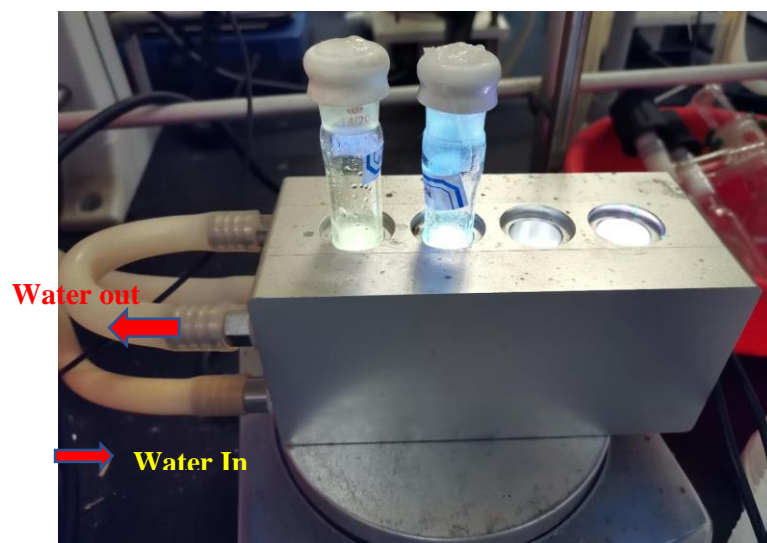

**Figure S1.** Reaction setup with cooling by running water.

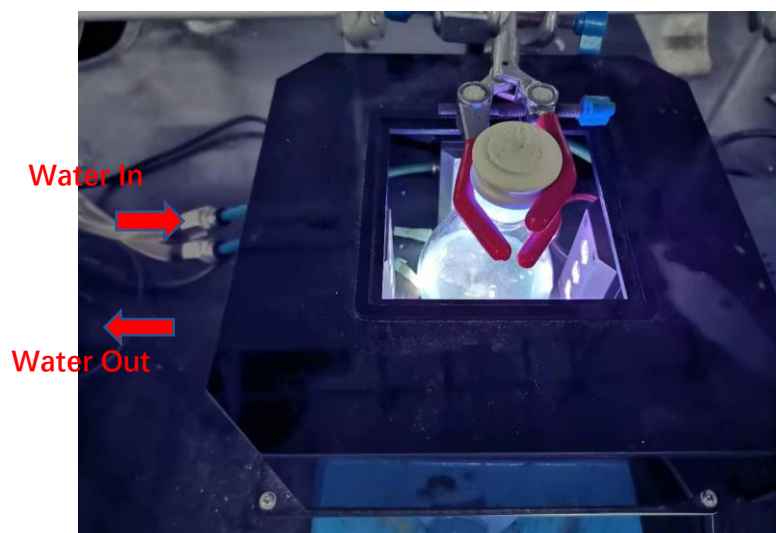

**Figure S2:** Large-scale photoreactor (25 W, 365 nm LEDs)

### Reported compounds:

(2-Chlorophenyl)(1H-indol-1-yl)methanone (**S1**),<sup>1</sup> (2-bromophenyl)(1H-indol-1-yl)methanone (**S1'**),<sup>2</sup> (1H-indol-1-yl)(2-iodophenyl)methanone (**S1''**),<sup>3</sup> *tert*-butyl (2-(1H-indol-3-yl)ethyl)carbamate,<sup>4</sup> (2-iodophenyl)(3-methyl-1H-indol-1-yl)methanone (**S17**),<sup>5</sup> 5-(allyloxy)-1H-indole,<sup>6</sup> (2-chlorophenyl)(2-methyl-1H-indol-1-yl)methanone (**S18**),<sup>7</sup> 1-(2-chlorobenzyl)-1H-indole (**42**).<sup>8</sup>

**Table S1:** Reaction condition optimization for the dearomatization of **S1**<sup>[a]</sup>

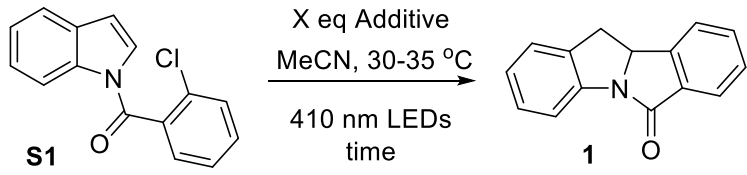

| Entry | Additive                                                                          | X    | Solvent            | Time / h | Yield (%)                             |
|-------|-----------------------------------------------------------------------------------|------|--------------------|----------|---------------------------------------|
| 1     | DIPEA                                                                             | 2.5  | MeCN               | 2        | 21                                    |
| 2     | DIPEA                                                                             | 2.5  | MeCN               | 4        | 46                                    |
| 3     | DIPEA                                                                             | 2.5  | MeCN               | 6        | 60                                    |
| 4     | DIPEA                                                                             | 2.5  | DMF                | 8        | 47                                    |
| 5     | DIPEA                                                                             | 2.5  | DMSO               | 8        | 40                                    |
| 6     | DIPEA                                                                             | 2.5  | Acetone            | 8        | 30                                    |
| 7     | DIPEA                                                                             | 2.5  | THF                | 8        | 6                                     |
| 8     | DIPEA                                                                             | 2.5  | DCE <sup>[b]</sup> | 8        | 10                                    |
| 9     | DIPEA                                                                             | 2.5  | Ethyl acetate      | 8        | 0                                     |
| 10    | DIPEA                                                                             | 2.5  | Toluene            | 8        | 0                                     |
| 11    | DIPEA                                                                             | 2.5  | MeOH               | 8        | 20                                    |
| 12    | DIPEA                                                                             | 0.5  | MeCN               | 8        | 21                                    |
| 13    | DIPEA                                                                             | 1.0  | MeCN               | 8        | 33                                    |
| 14    | TMEDA                                                                             | 2.5  | MeCN               | 8        | 20 <sup>[c]</sup>                     |
| 15    | Et <sub>3</sub> N                                                                 | 2.5  | MeCN               | 8        | 31 <sup>[c]</sup>                     |
| 16    | DABCO                                                                             | 2.5  | MeCN               | 8        | 0 <sup>[c]</sup>                      |
| 17    | K <sub>2</sub> CO <sub>3</sub>                                                    | 2.5  | MeCN               | 8        | 0 <sup>[c]</sup>                      |
| 18    | DIPEA                                                                             | 2.5  | MeCN               | 12       | 59 <sup>[c]</sup> , 54 <sup>[d]</sup> |
|       | Ir(ppy) <sub>3</sub> <sup>[e]</sup>                                               | 0.01 |                    |          |                                       |
| 19    | DIPEA                                                                             | 2.5  | MeCN               | 12       | 50 <sup>[c]</sup> , 84 <sup>[d]</sup> |
|       | [Ir(dF(CF <sub>3</sub> )ppy) <sub>2</sub> (dtbbpy)]PF <sub>6</sub> <sup>[f]</sup> | 0.01 |                    |          |                                       |

[a] **S1** (0.2 mmol), DIPEA (0.5 mmol) and acetonitrile (2.0 mL), irradiation under 410 nm LEDs at 30-35 °C for 2-12 hours. Yields were determined by <sup>1</sup>H NMR using dibromomethane or 1,3,5-trimethoxybenzene as internal standard. [b] DCE: 1,2-dichloroethane. [c] Under 365 nm LEDs irradiation. [d] Under 450 LEDs irradiation. [e] Hppy = 2-phenylpyridine. [f] HdF(CF<sub>3</sub>)ppy = 2-(2,4-difluorophenyl)-5-(trifluoromethyl)pyridine; dtbbpy = 4,4'-di-*tert*-butyl-2,2'-bipyridine.

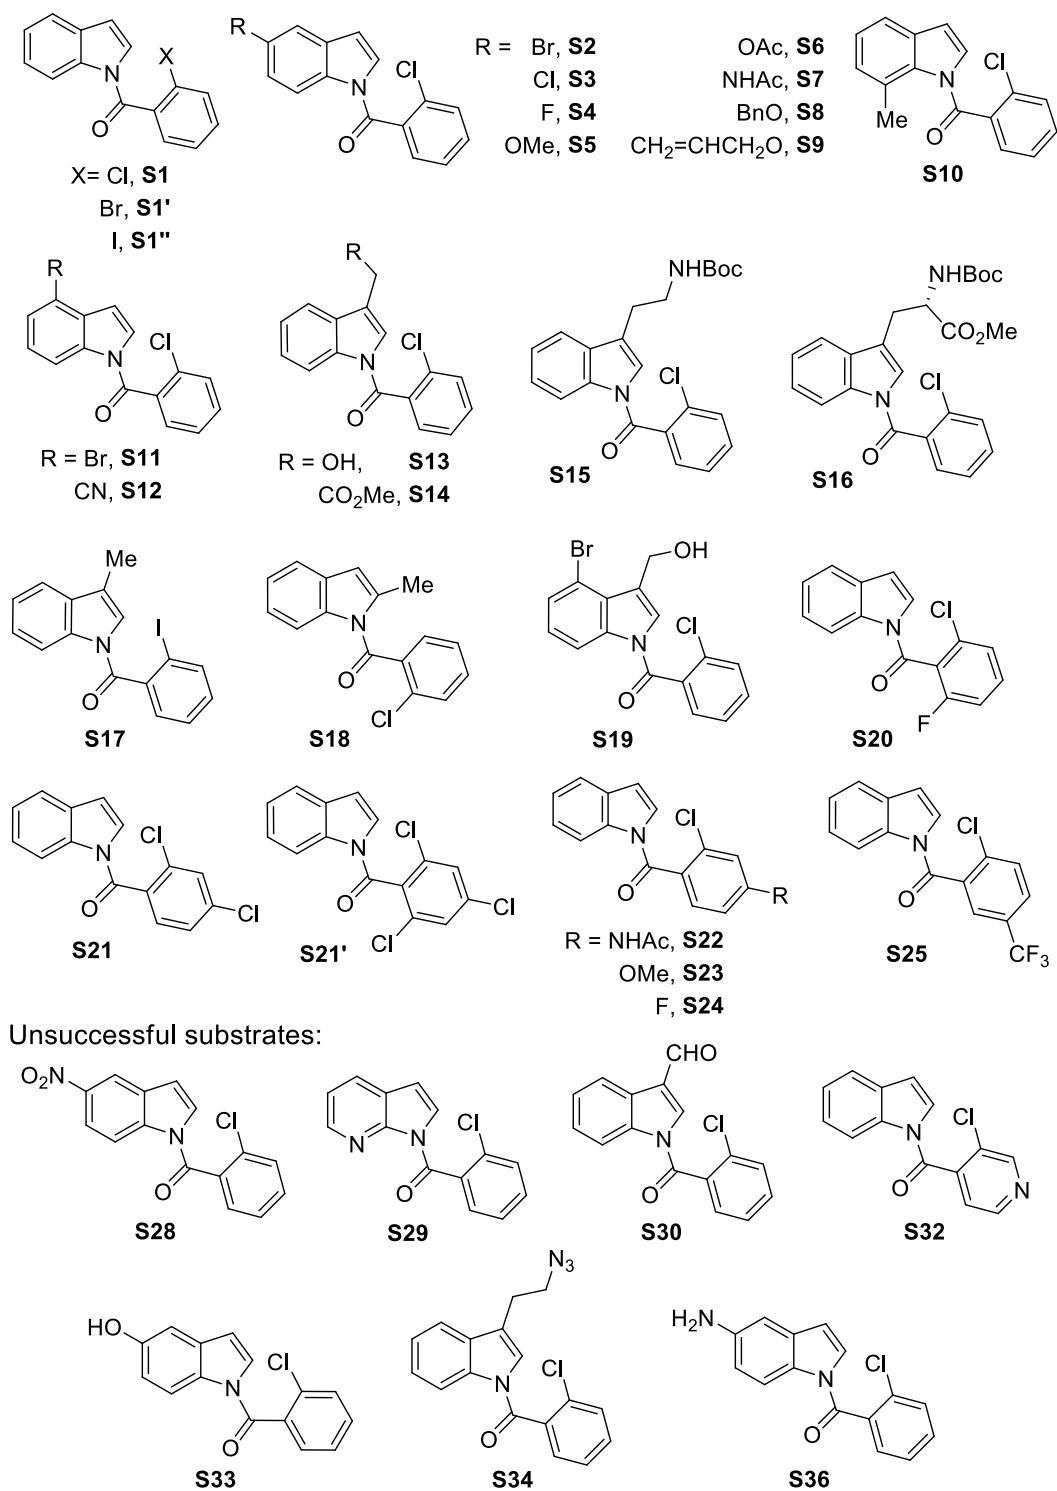

**Scheme S1:** Structures of substrates used for examining the scope of photo-induced dearomatization reaction.

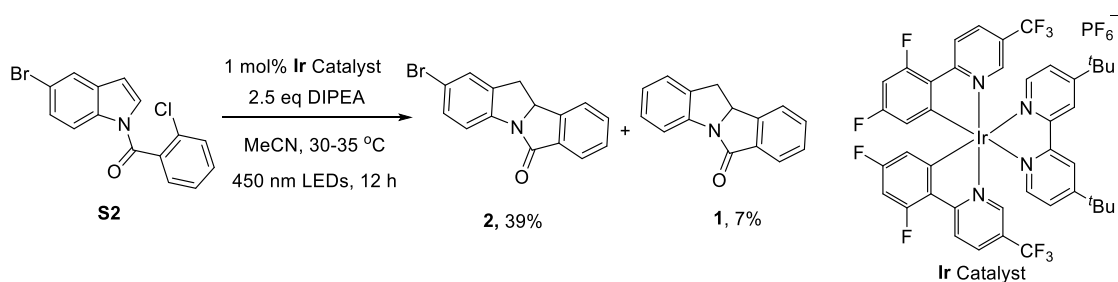

**Scheme S2:** The use of  $[\text{Ir}(\text{dF}(\text{CF}_3)\text{ppy})_2(\text{dttbpy})]\text{PF}_6^-$  as photocatalyst in photocyclization of N-(2-chlorobenzoyl)-5-bromoindole. Hydrodebrominated product was also obtained.

### Quantum yield determination for photochemical reaction

#### Determination of light intensity:

The 365 nm LED (FWHM = 8 nm) was used for photochemical quantum yield measurements. The photon flux was determined by ferrioxalate actinometry as follows: 5 mL of 0.15 M solution of potassium ferrioxalate (in 0.05 M  $\text{H}_2\text{SO}_4$ ) was placed in a reaction tube and irradiated with stirring. After irradiation, 20  $\mu\text{L}$  of the solution was treated subsequently with 200  $\mu\text{L}$  of 1,10-phenanthroline solution (5 mM in water) and 10  $\mu\text{L}$  of buffer solution (0.6 M in NaOAc and 0.18 M in  $\text{H}_2\text{SO}_4$ ). The solution was rested in the dark for 10 min, and then made up to 2 mL with water. The absorbance at 510 nm was measured (due to absorption of  $[\text{Fe}^{\text{II}}(\text{phen})_3]^{2+}$ ). A non-irradiated sample was similarly prepared to analyze the amount of Fe(II) present in the stock 0.15 M ferrioxalate solution. The increase in absorbance of the solution after 3s, 6s and 9s of light irradiation are 0.344, 0.629 and 0.946, respectively, which gives an average increase of absorbance of 0.104 per second. The amount of photo-generated Fe(II) ions per second was calculated using equation (1) to be 4.72  $\mu\text{mol}$ .

$$\text{mol of Fe(II)} = \frac{V \times \Delta A \times DF}{b \times \varepsilon} \quad (1)$$

where V is the volume of absorbance measurement (0.005  $\text{dm}^3$ ),  $\Delta A$  is the difference in absorbance at 510 nm between the irradiated and non-irradiated samples (0.104), DF is the dilution factor (100 times), b is the path length (1 cm), and  $\varepsilon$  is the molar absorptivity ( $\varepsilon = 11,010 \text{ cm}^{-1} \text{ M}^{-1}$ ).

The photon flux was calculated using equation (2) to be  $3.91 \times 10^{-6} \text{ einstein s}^{-1}$ .

$$\text{photon flux} = \frac{\text{mol of Fe(II)}}{\Phi \times t \times f} \quad (2)$$

where  $\Phi$  is the quantum yield for the ferrioxalate actinometer (assumed to be 1.21 based on the reported value at 365 nm.<sup>9</sup> t is time of irradiation (1 s), and f is the fraction of light absorbed at 365 nm (> 99.9 %) by the 0.15 M potassium ferrioxalate solution.

### Determination of photochemical reaction quantum yield

The reaction mixture (typical reaction condition in Table 2: *N*-(2-chlorobenzoyl)indole (0.5 mmol), *N,N*-diisopropylethylamine (1.25 mmol) in CH<sub>3</sub>CN (5 mL) at room temperature under argon was prepared in a reaction tube and the absorbance at 365 nm is 0.26 (i.e. ~45 % light absorbed). The reaction tube was then irradiated with 365 nm LED with stirring. After 40 minutes, 89.2 μmol of product were formed (determined by <sup>1</sup>H NMR spectroscopy), corresponding to a quantum yield of 2.1%.

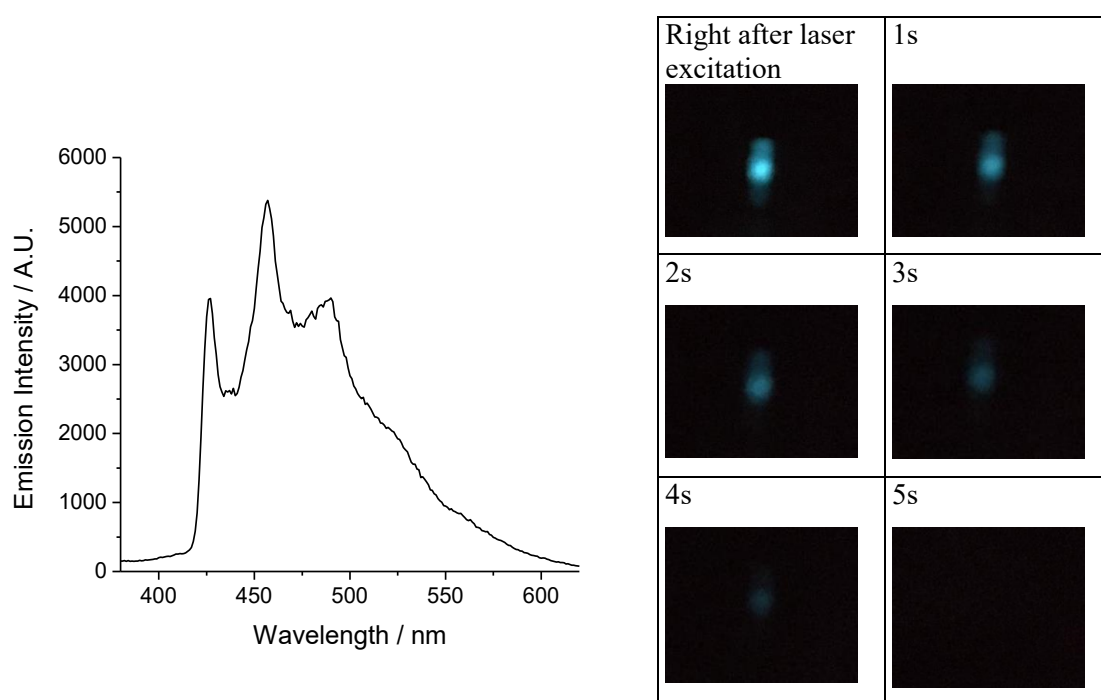

**Figure S3:** Left: emission spectrum of **S1** in 2-MeTHF at 77 K. (concentration of **S1** =  $1 \times 10^{-4}$  M; excitation at 325 nm); Right: photos showing the afterglow recorded within a few seconds after laser pulse excitation. (photos taken with iPhone 6s)



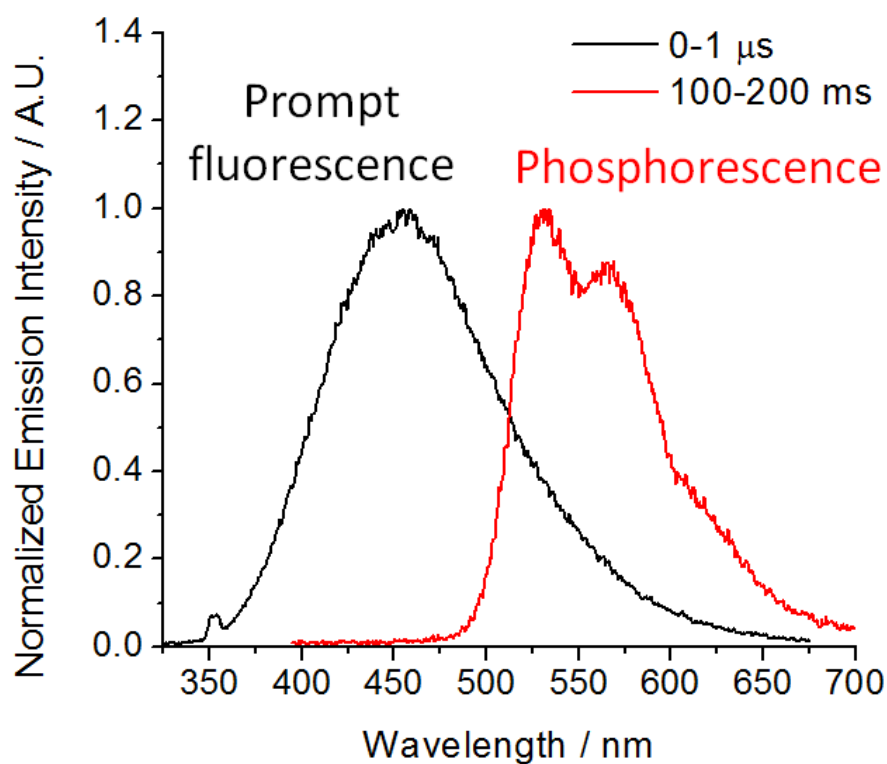

**Figure S4:** Time-resolved emission spectra of **S3** in the solid state at room temperature. Excitation at 355 nm..

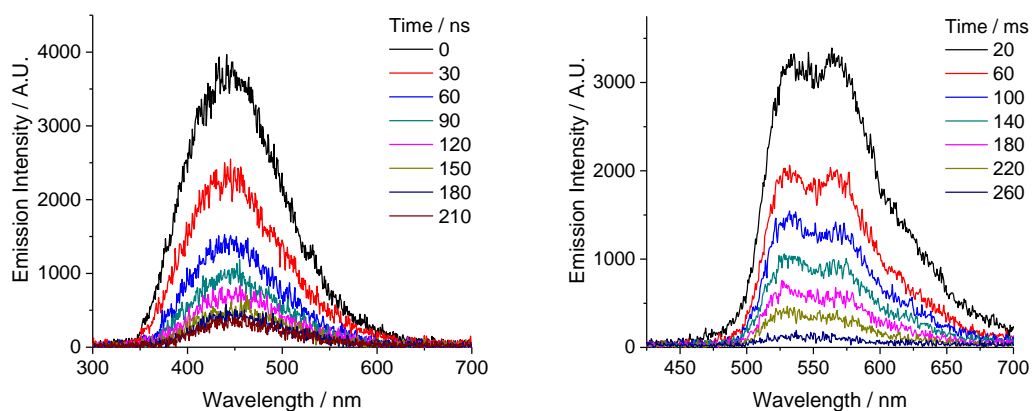

**Figure S5.** Time-resolved emission spectra of **S3** in the solid state at room temperature. Gate width = 30 ns (left) and 40 ms (right).

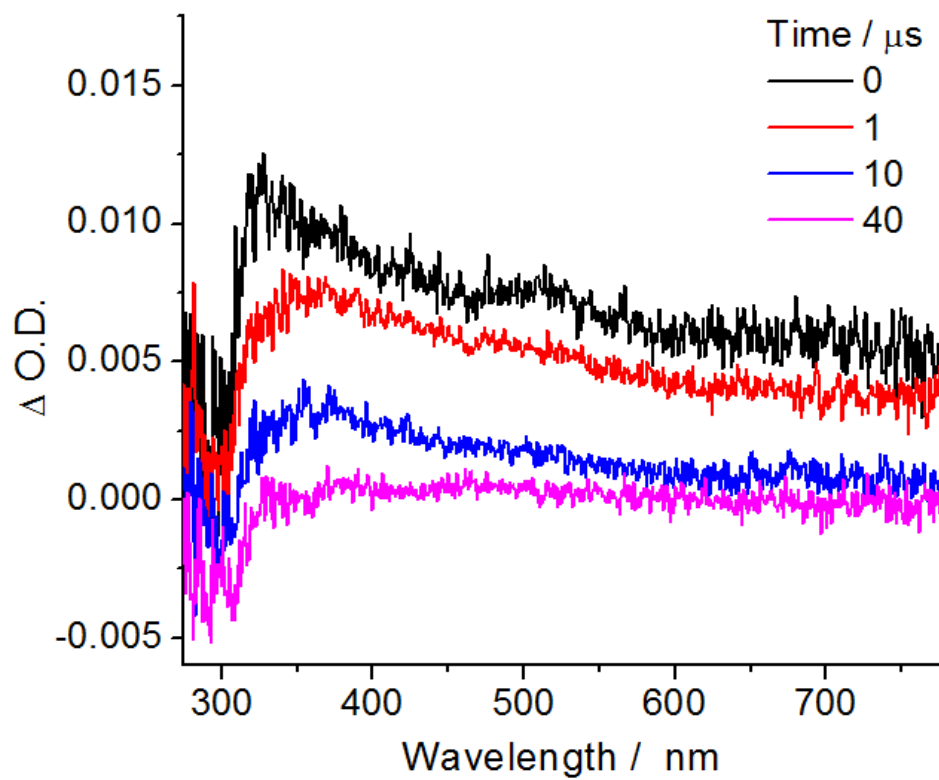

**Figure S6:** ns-TA spectra of **S3** in degassed MeCN (excitation at 266 nm).

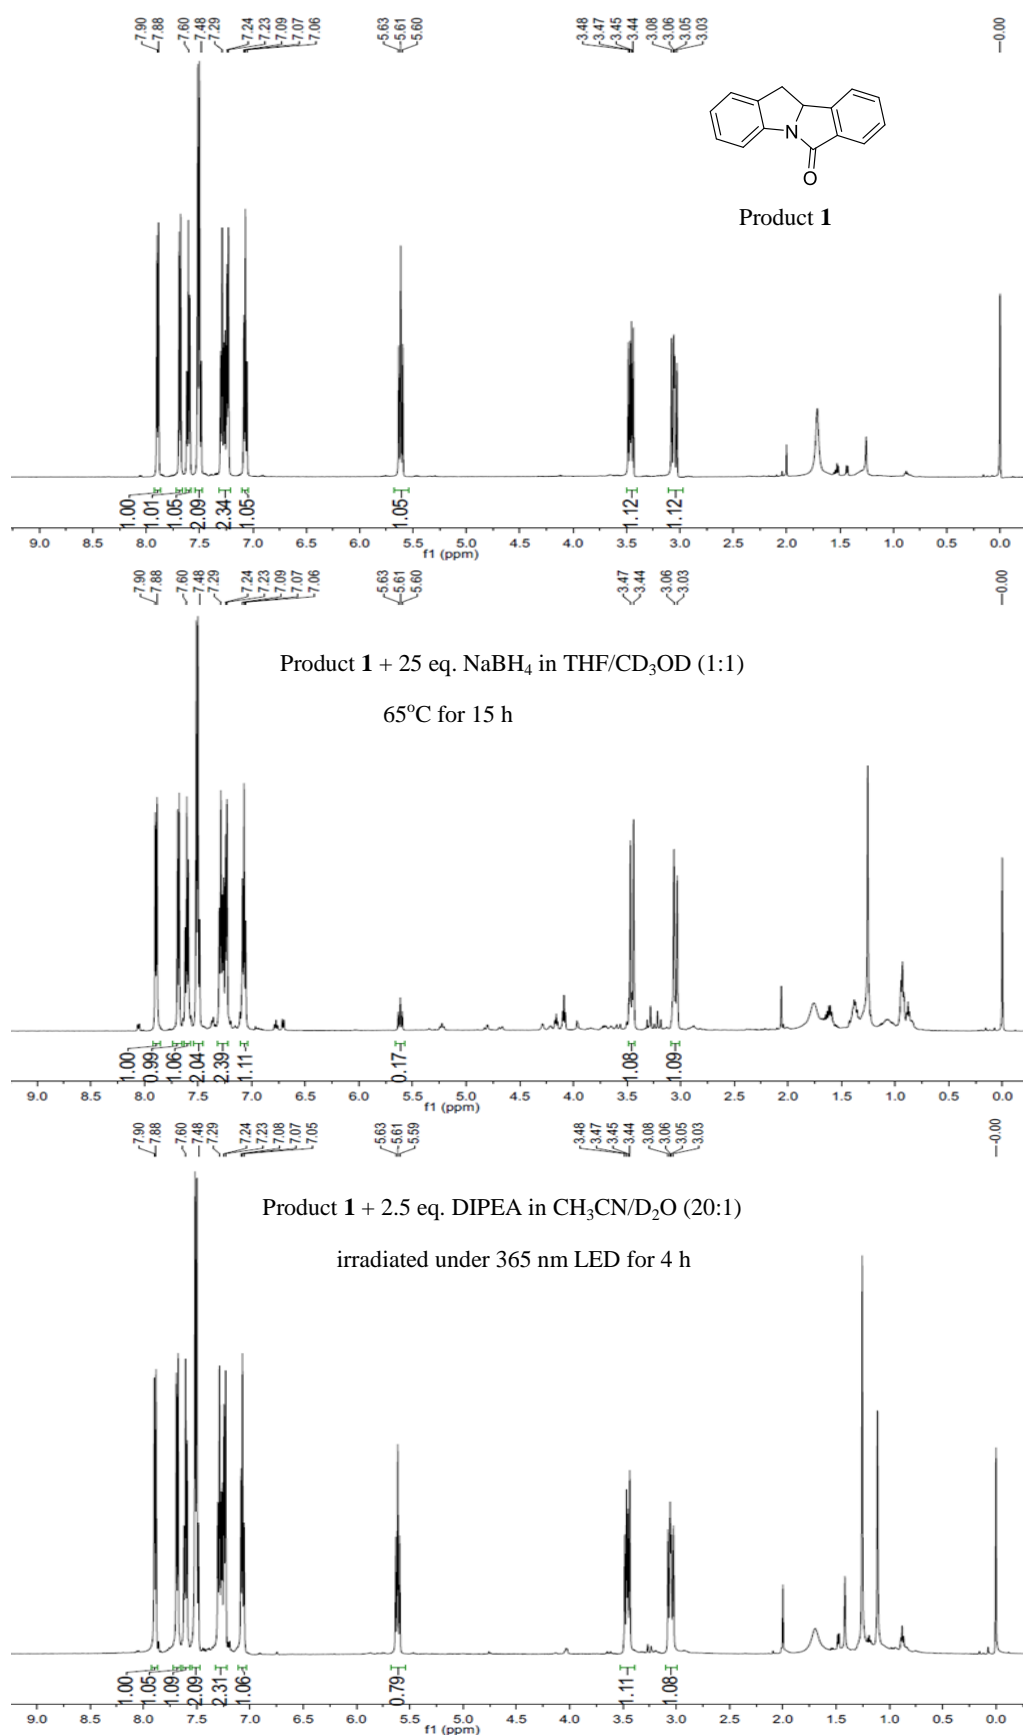

**Figure S7.** <sup>1</sup>H NMR spectra showing the incorporation of deuterium at C2 position (at ~5.6 ppm) upon treatment with NaBH<sub>4</sub> or DIPEA in the presence of deuterated protic solvent.

## EPR Experiments

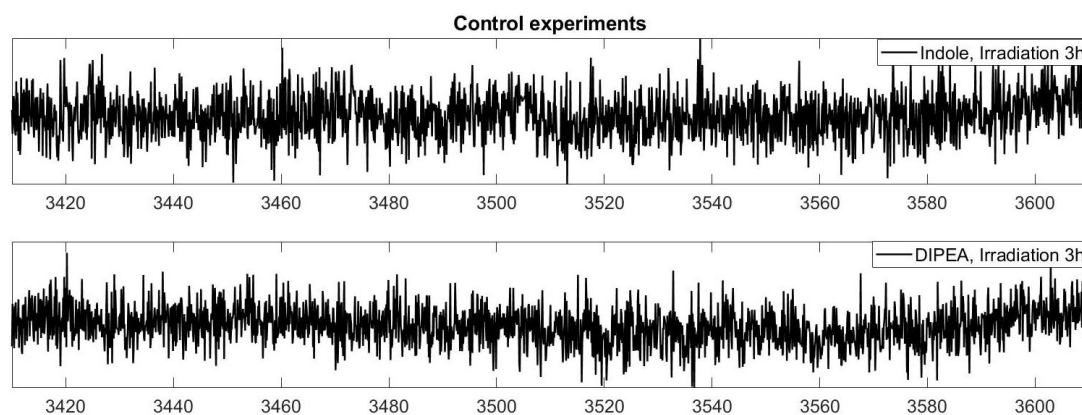

**Figure S8:** EPR spectra of control experiments. Upper: *N*-benzoyl indole **S1**, irradiated for 3 hours; Bottom: DIPEA, irradiated for 3 hours. Recorded at room temperature. Freq.: 9.841 GHz; Mod. Amp.: 1 G.

In a 10 mL test tube with a magnetic stirring bar, indole derivative **S1** (0.2 mmol) or DIPEA (87  $\mu$ L) was dissolved in MeCN (2.0 mL). The test tube was sealed with a septum. The mixture was purged with argon for ten minutes. Then the mixture was irradiated at 30-35  $^{\circ}$ C with 365 nm LEDs for 3 h. The sample was obtained with a capillary which was inserted into the mixture to obtain a 3 cm long sample solution under the protection of argon balloon. The upper and lower ends of the capillary were sealed with grease. The capillary was put into a small EPR tube, analyzed by EPR spectrometer at room temperature.

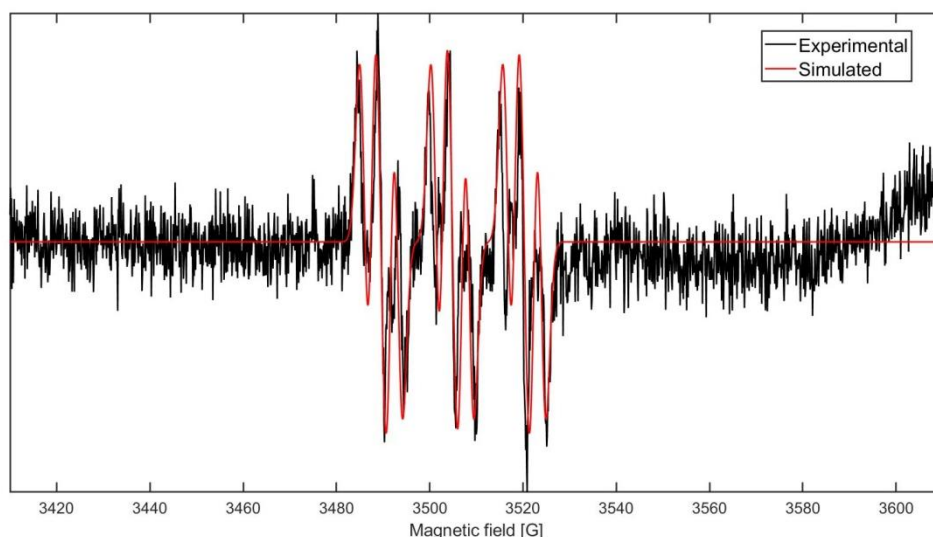

**Figure S9:** X-band EPR spectrum of the reaction mixture of indole derivative **S1** and DIPEA in MeCN, upon 365 nm LEDs irradiation for 3 hours, recorded at room temperature. Freq.: 9.841 GHz; Mod. Amp.: 1 G.

In a 10 mL test tube with a magnetic stirring bar, indole derivative (0.5 mmol), DIPEA (0.218 mL, 2.5 equiv) were dissolved in MeCN (5.0 mL). The test tube was sealed with a

septum. The mixture was purged with argon for ten minutes. Then the mixture was irradiated at 30-35 °C with 365 nm LEDs for 3 h. The sample was obtained with a capillary which was inserted into the mixture to obtain a 3 cm long sample solution under the protection of argon balloon. The upper and lower ends of the capillary were sealed with grease. The capillary was put into a small EPR tube, analyzed by EPR spectrometer at room temperature.

No signal could be detected when substrate **S1** or DIPEA alone was irradiated for 3 hours (Figure S8). Irradiation of a mixture of **S1** and DIPEA for 3 hours gave a set of triplet signal as shown in Figure S9. The signal could be approximately fitted with  $g = 2.0060$ ,  $A_N = 15.2$  G,  $A_{H1} = 4.1$  G and  $A_{H2} = 3.7$  G. The  $g$  value is higher than those of typical aliphatic amine cation radicals,<sup>10,11</sup> and is comparable to those of nitroxide radicals.<sup>11</sup> The DIPEA radical cation<sup>12</sup> and its deprotonated derivatives has been reported to be very short-lived, especially in basic solutions.<sup>13</sup>

The splitting of the signal mainly arises from one  $^{14}\text{N}$  ( $I = 1$ ) nucleus with  $A = 15.2$  G and two  $^1\text{H}$  ( $S = 1/2$ ) nuclei, probably at the  $\alpha$ -C atom(s), with  $A = 4.1$  and  $3.7$  G. It should be noted that contributions from  $^1\text{H}$  nuclei with smaller  $A$  values might also be present, while the associated splittings are, however, not resolved in the recorded spectrum. Possible radical species giving rise to this signal is a tertiary or secondary aliphatic nitroxide radical, which is temporarily accumulated in a decaying process of DIPEA upon photo-oxidation.

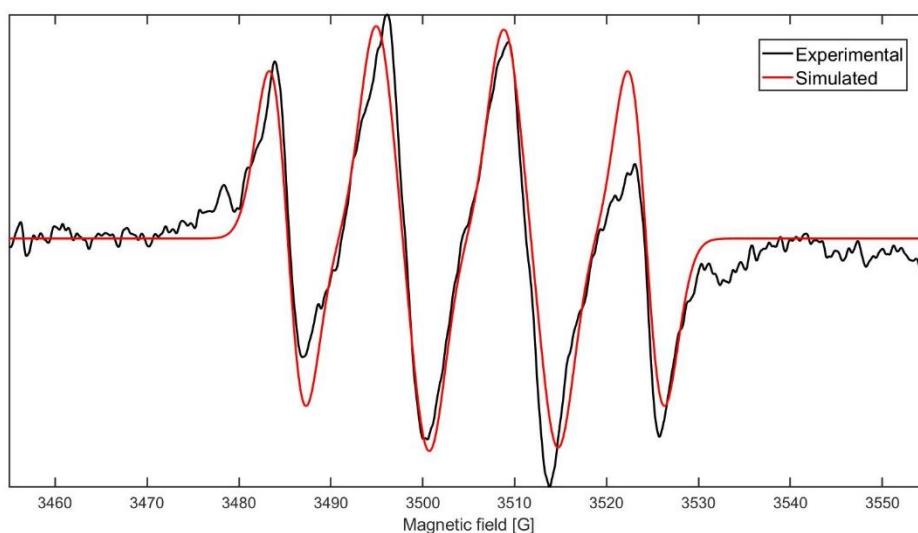

**Figure S10:** X-band EPR spectrum of the reaction mixture of indole derivative **S1** and DIPEA in MeCN, upon 365 nm LEDs irradiation for 3 hours, then trapped with DMPO, recorded at room temperature. Freq.: 9.841 GHz; Mod. Amp.: 1 G.

In a 10 mL test tube with a magnetic stirring bar, indole derivative (0.2 mmol), DIPEA (87  $\mu\text{L}$ , 2.5 equiv) were dissolved in MeCN (2.0 mL). The test tube was sealed with a septum. The mixture was purged with argon for ten minutes. Then the mixture was irradiated at 30-35 °C

with 365 nm LEDs for 3 h. 1 mL sample solution was taken out and mixed with DMPO (10  $\mu$ L) under argon atmosphere. The sample was obtained with a capillary which was inserted into the mixture to obtain a 3 cm long sample solution under the protection of argon balloon. The upper and lower ends of the capillary were sealed with grease. The capillary was put into a small EPR tube, analyzed by EPR spectrometer at room temperature.

The major signal could be fitted with parameters:  $g = 2.0061$ ,  $A_N = 14.0$  G and  $A_H = 11.1$  G with a line width of 4 G. The fitting parameters do not correspond to an aryl/alkyl radical, in which case a signal generally spanning a spectral width of  $\sim 60$  gauss or higher would be expected. Instead, they are comparable to typical DMPO-trapped  $O_2^{\cdot-}$  or  $\bullet OOH/R$  radicals,<sup>14</sup> which might be generated in a trace amount and not significantly interfering with the rapidly preceding intramolecular radical cyclization processes. Hydroxide radical ( $\bullet OH$ ) might also be present in an even lower concentration, giving the minor overlapping side features in the spectrum. However, broadening of the signals prohibits more detailed analysis of the spectrum.

### UV-vis absorption

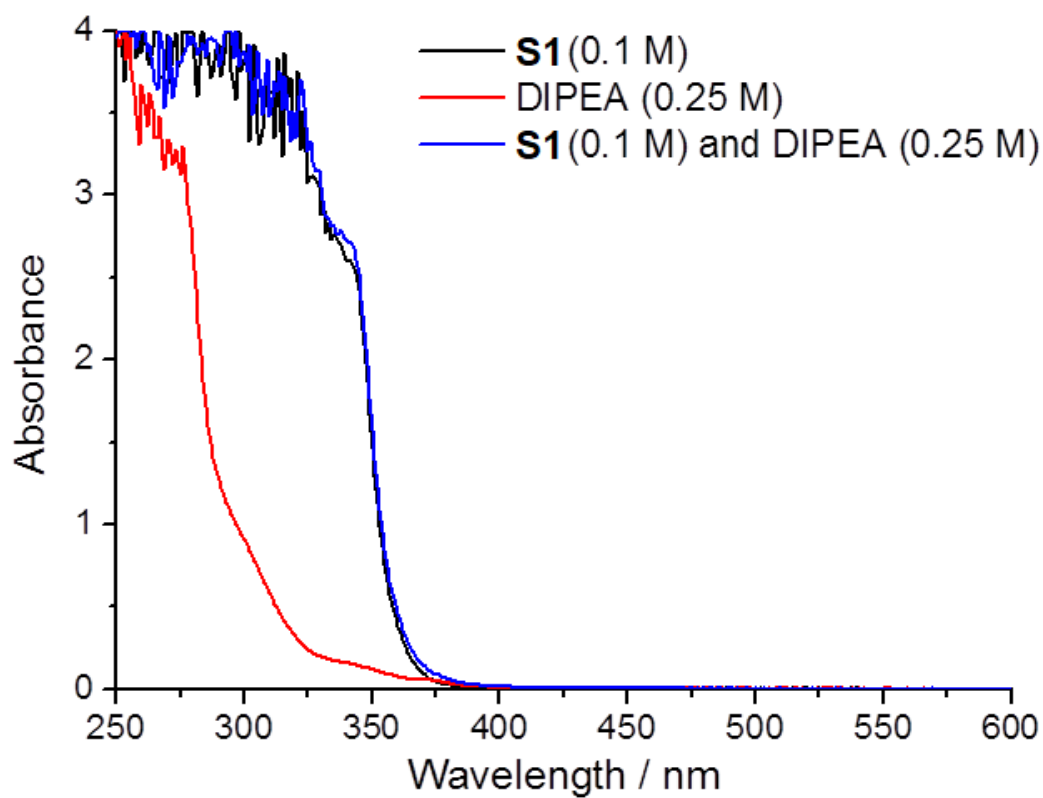

**Figure S11.** UV-vis absorption spectra of S1, DIPEA and their mixture in MeCN at room temperature.

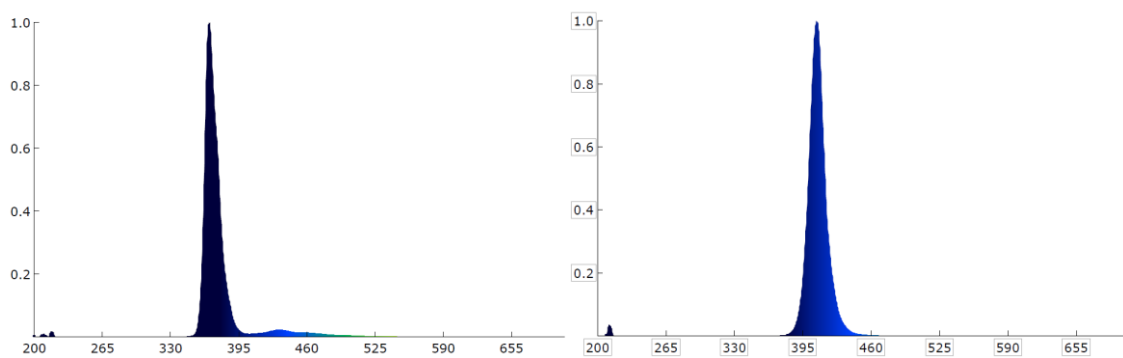

**Figure S12.** Emission output of 365 (left) and 410 (right) nm LEDs.

## Experimental Procedure

### Scheme S3a: Synthesis of substrates.

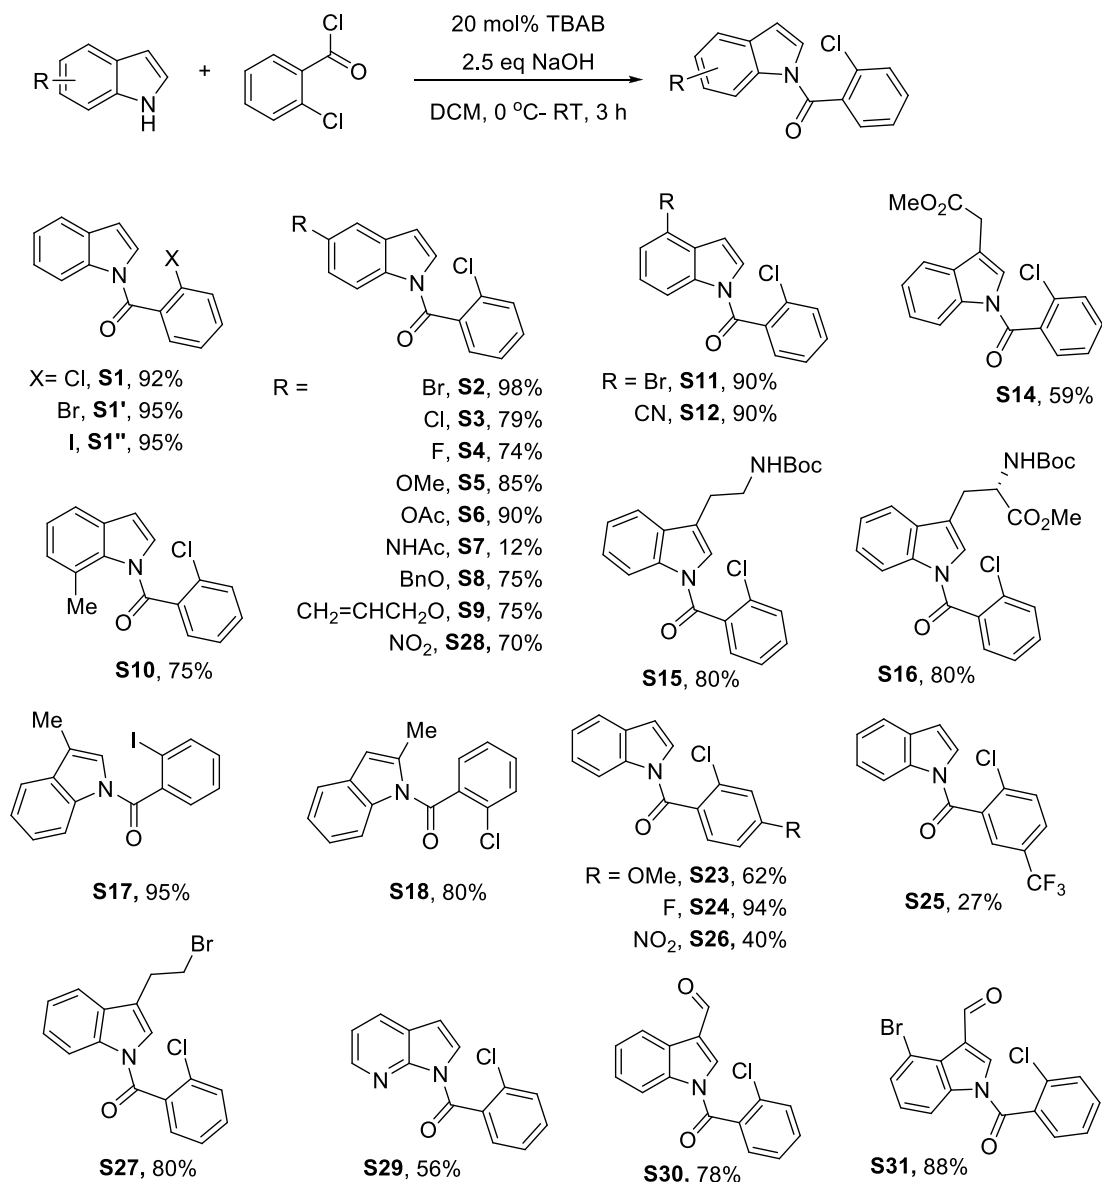

### General Procedure 1: Synthesis of *N*-(2-halidebenzoyl)indole<sup>14</sup>

A CH<sub>2</sub>Cl<sub>2</sub> solution of 2-chlorobenzoyl chloride (1.5 equiv) was added dropwise to a solution of the indole derivative (1 equiv), NaOH (2.5 equiv) and tetrabutylammonium bromide (TBAB, 0.2 equiv) in CH<sub>2</sub>Cl<sub>2</sub> at 0 °C. The mixture was stirred at 0 °C for 0.5 h. Then the mixture was warmed to room temperature. At this time another 0.5 equivalent of 2-chlorobenzoyl chloride was added. The mixture was stirred at room temperature for 2.5 h. Water was added to quench the reaction and extracted with CH<sub>2</sub>Cl<sub>2</sub> (3 × 20 mL). The combined organic layer was washed with brine, dried over Na<sub>2</sub>SO<sub>4</sub>. The solvent was removed under reduced pressure. The residue was purified by flash column chromatography (PE:EA = 10:1).



## General Procedure 2: Synthesis of *N*-(2-chlorobenzoyl)indole using NaH

### Scheme S3b: Synthesis of substrates using NaH

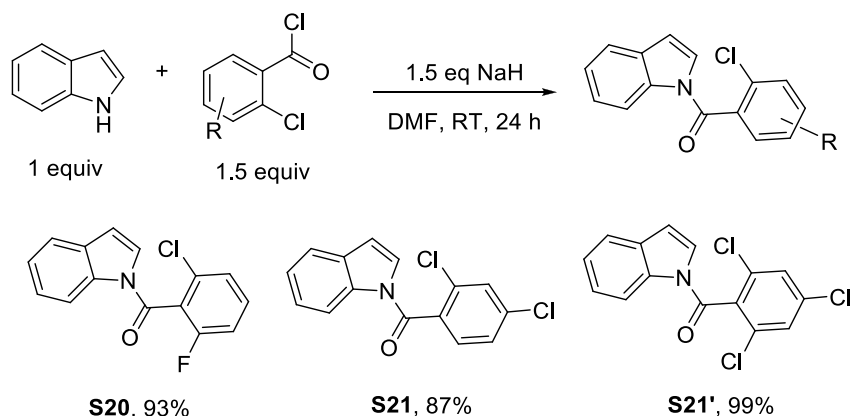

In a 50 mL Schlenk tube with a magnetic stirring bar, indole (1 equiv) was added. The Schlenk tube was evacuated and back-filled with argon for three times. Then anhydrous DMF (10 mL) was added and cooled down to 0 °C. To this solution, a 60% dispersion of NaH in mineral oil (1.5 equiv) was added and stirred at 0 °C for 0.5 h. A solution of the corresponding benzoyl chloride (1.5 equiv) in DMF (5 mL) was added dropwise. Then the mixture was warmed to room temperature and stirred for 24 h. Water was added to quench the reaction and extracted with CH<sub>2</sub>Cl<sub>2</sub> (3 times). The combined organic layer was washed with brine, dried over Na<sub>2</sub>SO<sub>4</sub>. The solvent was removed under reduced pressure. The residue was purified by flash column chromatography (PE:EA = 10:1).

### (2-Chlorophenyl)(1H-indol-1-yl)methanone (S1)<sup>1</sup>

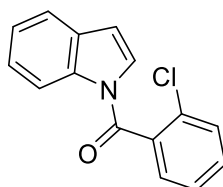

<sup>1</sup>H NMR (400 MHz, CDCl<sub>3</sub>) δ 8.49 (br, 1 H), 7.63 (d, *J* = 7.6 Hz, 1 H), 7.56 – 7.50 (m, 3 H), 7.44 (m, 2 H), 7.37 (t, *J* = 7.5 Hz, 1 H), 7.01 (br, 1 H), 6.63 (d, *J* = 3.8 Hz, 1 H) ppm.

### (2-Bromophenyl)(1H-indol-1-yl)methanone (S1')<sup>2</sup>

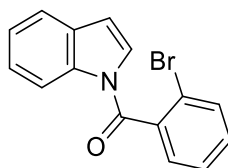

$^1\text{H}$  NMR (400 MHz,  $\text{CDCl}_3$ )  $\delta$  8.47 (br, 1 H), 7.72 (d,  $J = 7.9$  Hz, 1 H), 7.65 – 7.57 (m, 1 H), 7.55 – 7.49 (m, 2 H), 7.49 – 7.40 (m, 2 H), 7.36 (t,  $J = 7.5$  Hz, 1 H), 6.99 (br, 6.99, 1 H), 6.64 (d,  $J = 3.8$  Hz, 1 H) ppm.

**(1H-Indol-1-yl)(2-iodophenyl)methanone (S1'')**<sup>3</sup>

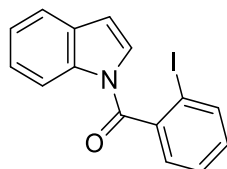

$^1\text{H}$  NMR (400 MHz,  $\text{CDCl}_3$ )  $\delta$  8.44 (br, 1 H), 7.97 (d,  $J = 8.0$  Hz, 1 H), 7.62 (d,  $J = 7.4$  Hz, 1 H), 7.56 – 7.50 (m, 1 H), 7.49 – 7.39 (m, 2 H), 7.36 (t,  $J = 7.5$  Hz, 1 H), 7.30 – 7.20 (m, 1 H), 6.98 (br, 1 H), 6.64 (d,  $J = 3.6$  Hz, 1 H) ppm.

**(5-Bromo-1H-indol-1-yl)(2-chlorophenyl)methanone (S2)**

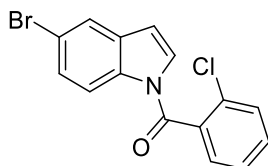

$^1\text{H}$  NMR (500 MHz,  $\text{CDCl}_3$ )  $\delta$  8.35 (br, 1 H), 7.73 (d,  $J = 2.0$  Hz, 1 H), 7.55 – 7.48 (m, 4 H), 7.47 – 7.40 (m, 1 H), 7.00 (br, 1 H), 6.56 (d,  $J = 3.8$  Hz, 1 H);  $^{13}\text{C}$  NMR (126 MHz,  $\text{CDCl}_3$ )  $\delta$  165.91, 134.36, 134.15, 132.80, 131.96, 131.24, 130.21, 128.93, 128.10, 127.83, 127.26, 123.75, 117.88, 117.70, 108.91 ppm. HRMS (ESI) Calcd for  $[\text{C}_{15}\text{H}_9\text{ClBrNO}+\text{H}]^+$ : 333.9629, Found: 333.9636.

**(5-Chloro-1H-indol-1-yl)(2-chlorophenyl)methanone (S3)**

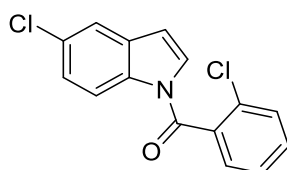

$^1\text{H}$  NMR (500 MHz,  $\text{CDCl}_3$ )  $\delta$  8.40 (br, 1 H), 7.57 (d,  $J = 2.0$  Hz, 1 H), 7.56 – 7.51 (m, 3 H), 7.49 – 7.42 (m, 1 H), 7.37 (d,  $J = 8.7$  Hz, 1 H), 7.02 (s, 1 H), 6.57 (d,  $J = 3.8$  Hz, 1 H);  $^{13}\text{C}$  NMR (126 MHz,  $\text{CDCl}_3$ )  $\delta$  165.88, 134.41, 133.79, 132.29, 131.91, 131.29, 130.20, 129.96, 128.91, 127.92, 127.22, 125.43, 120.66, 117.51, 109.01 ppm. HRMS (ESI) Calcd for  $[\text{C}_{15}\text{H}_9\text{Cl}_2\text{NO}+\text{H}]^+$ : 290.0134, Found: 290.0140.

**(2-Chlorophenyl)(5-fluoro-1H-indol-1-yl)methanone (S4)**

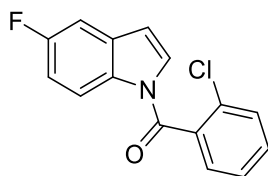

$^1\text{H}$  NMR (400 MHz,  $\text{CDCl}_3$ )  $\delta$  8.45 (s, 1 H), 7.53 (m, 3 H), 7.49 – 7.41 (m, 1 H), 7.27 (d,  $J = 9.8$  Hz, 1 H), 7.14 (t,  $J = 8.0$  Hz, 1 H), 7.02 (s, 1 H), 6.59 (br, 1 H);  $^{19}\text{F}$  NMR decoupling (376 MHz,  $\text{CDCl}_3$ )  $\delta$  -118.26;  $^{13}\text{C}$  NMR (101 MHz,  $\text{CDCl}_3$ )  $\delta$  165.76, 160.10 (d,  $J = 241.2$  Hz), 134.52, 132.14 (d,  $J = 10.1$  Hz), 131.82, 131.29, 130.17, 128.90, 128.19, 127.18, 117.59 (d,  $J = 8.9$  Hz), 112.93 (d,  $J = 24.8$  Hz), 109.41 (d,  $J = 3.8$  Hz), 106.70 (d,  $J = 24.0$  Hz) ppm. HRMS (ESI) Calcd for  $[\text{C}_{15}\text{H}_9\text{ClFNO}+\text{H}]^+$ : 274.0429, Found: 274.0434.

**(2-Chlorophenyl)(5-methoxy-1H-indol-1-yl)methanone (S5)**

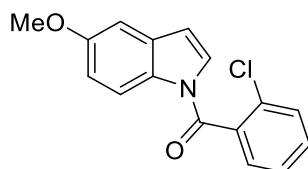

$^1\text{H}$  NMR (400 MHz,  $\text{CDCl}_3$ )  $\delta$  8.41 (br, 1 H), 7.57 – 7.47 (m, 3 H), 7.45 - 7.41 (m, 1 H), 7.08 (d,  $J = 2.4$  Hz, 1 H), 7.03 (d,  $J = 8.8$  Hz, 1 H), 6.96 (br, 1 H), 6.56 (d,  $J = 3.8$  Hz, 1 H), 3.89 (s, 3 H);  $^{13}\text{C}$  NMR (101 MHz,  $\text{CDCl}_3$ )  $\delta$  165.60, 157.04, 134.82, 132.13, 131.64, 131.28, 130.11, 128.89, 127.35, 127.13, 117.33, 113.49, 109.73, 103.94, 55.72 ppm. HRMS (ESI) Calcd for  $[\text{C}_{16}\text{H}_{12}\text{ClNO}_2+\text{H}]^+$ : 286.0629, Found: 286.0634.

**1-(2-Chlorobenzoyl)-1H-indol-5-yl acetate (S6)**

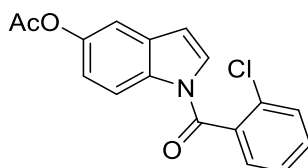

$^1\text{H}$  NMR (400 MHz,  $\text{CDCl}_3$ )  $\delta$  8.48 (br, 1 H), 7.56 – 7.49 (m, 3 H), 7.48 – 7.41 (m, 1 H), 7.33 (d,  $J = 2.3$  Hz, 1 H), 7.13 (dd,  $J = 8.8, 2.3$  Hz, 1 H), 7.02 (s, 1 H), 6.60 (d,  $J = 3.7$  Hz, 1 H), 2.36 (s, 3 H);  $^{13}\text{C}$  NMR (101 MHz,  $\text{CDCl}_3$ )  $\delta$  169.98, 165.84, 147.44, 134.54, 133.19, 131.85, 131.82, 131.25, 130.17, 128.88, 127.85, 127.20, 118.96, 117.22, 113.66, 109.61, 21.20 ppm. HRMS (ESI) Calcd for  $[\text{C}_{17}\text{H}_{12}\text{ClNO}_3+\text{H}]^+$ : 314.0578, Found: 314.0584.

**(5-(Benzyloxy)-1H-indol-1-yl)(2-chlorophenyl)methanone (S8)**

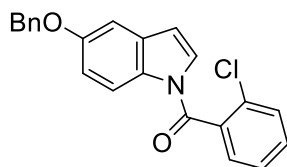

$^1\text{H}$  NMR (500 MHz,  $\text{CDCl}_3$ )  $\delta$  8.42 (br, 1 H), 7.55 – 7.45 (m, 5 H), 7.45 – 7.37 (m, 3 H), 7.34 (t,  $J = 7.3$  Hz, 1 H), 7.13 (d,  $J = 2.5$  Hz, 1 H), 7.08 (d,  $J = 9.1$  Hz, 1 H), 6.93 (br, 1 H), 6.53 (d,  $J = 3.8$  Hz, 1 H), 5.14 (s, 2 H);  $^{13}\text{C}$  NMR (126 MHz,  $\text{CDCl}_3$ )  $\delta$  164.55, 155.12, 136.07, 133.75, 131.02, 130.57, 130.24, 129.22, 129.05, 127.83, 127.57, 126.92, 126.44, 126.30, 126.05, 116.33, 113.22, 108.67, 104.22, 69.50 ppm. HRMS (ESI) Calcd for  $[\text{C}_{22}\text{H}_{16}\text{ClNO}_2+\text{H}]^+$ : 362.0942, Found: 362.0948.

**(5-(Allyloxy)-1H-indol-1-yl)(2-chlorophenyl)methanone (S9)**

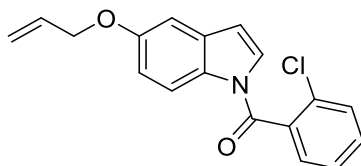

$^1\text{H}$  NMR (500 MHz,  $\text{CDCl}_3$ )  $\delta$  8.44 (br, 1 H), 7.59 – 7.47 (m, 3 H), 7.43 (t,  $J = 7.4$  Hz, 1 H), 7.09 (d,  $J = 2.2$  Hz, 1 H), 7.05 (d,  $J = 8.3$  Hz, 1 H), 6.94 (br, 1 H), 6.55 (d,  $J = 3.6$  Hz, 1 H), 6.15 – 6.08 (m, 1 H), 5.48 (d,  $J = 10.5, 1.7$  Hz, 1 H), 5.33 (d,  $J = 10.5, 1.5$  Hz, 1 H), 4.63 (d,  $J = 5.2$  Hz, 2 H);  $^{13}\text{C}$  NMR (126 MHz,  $\text{CDCl}_3$ )  $\delta$  165.60, 155.99, 134.80, 133.42, 132.08, 131.64, 131.27, 130.22, 130.11, 128.89, 127.36, 127.13, 117.69, 117.32, 114.17, 109.73, 105.13, 69.37 ppm. HRMS (ESI) Calcd for  $[\text{C}_{18}\text{H}_{14}\text{ClNO}_2+\text{H}]^+$ : 312.0786, Found: 312.0791.

**(2-Chlorophenyl)(7-methyl-1H-indol-1-yl)methanone (S10)**

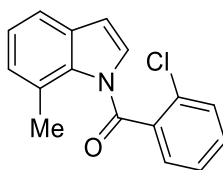

$^1\text{H}$  NMR (400 MHz,  $\text{CDCl}_3$ )  $\delta$  7.65 (d,  $J = 6.9$  Hz, 1 H), 7.59 – 7.49 (m, 2 H), 7.48 – 7.38 (m, 2 H), 7.29 (t,  $J = 7.5$  Hz, 1 H), 7.24 (d,  $J = 7.2$  Hz, 1 H), 6.95 (d,  $J = 3.8$  Hz, 1 H), 6.60 (d,  $J = 3.8$  Hz, 1 H), 2.68 (s, 3 H);  $^{13}\text{C}$  NMR (101 MHz,  $\text{CDCl}_3$ )  $\delta$  165.13, 135.05, 134.83, 132.43, 132.35, 132.23, 130.56, 130.31, 128.20, 127.96, 127.10, 126.71, 124.56, 118.65, 109.18, 22.36 ppm. HRMS (ESI) Calcd for  $[\text{C}_{16}\text{H}_{12}\text{ClNO}+\text{H}]^+$ : 270.0680, Found: 270.0684.

**(4-Bromo-1H-indol-1-yl)(2-chlorophenyl)methanone (S11)**

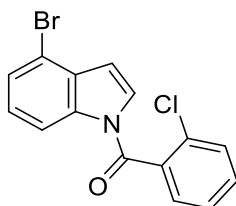

$^1\text{H}$  NMR (500 MHz,  $\text{CDCl}_3$ )  $\delta$  8.39 (br, 1 H), 7.66 – 7.48 (m, 4 H), 7.46 – 7.38 (m, 1 H), 7.26 (t,  $J = 8.0$  Hz, 1 H), 7.03 (br, 1 H), 6.68 (d,  $J = 3.8$  Hz, 1 H);  $^{13}\text{C}$  NMR (126 MHz,  $\text{CDCl}_3$ )  $\delta$  165.07, 134.74, 133.35, 130.92, 130.65, 130.24, 129.19, 127.87, 126.26, 126.21, 126.17, 125.30, 114.51, 113.67, 108.42 ppm. HRMS (ESI) Calcd for  $[\text{C}_{15}\text{H}_9\text{ClBrNO}+\text{H}]^+$ : 333.9629, Found: 333.9635.

**1-(2-Chlorobenzoyl)-1H-indole-4-carbonitrile (S12)**

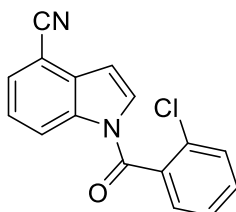

$^1\text{H}$  NMR (400 MHz,  $\text{CDCl}_3$ )  $\delta$  8.72 (d,  $J = 6.7$  Hz, 1 H), 7.68 (d,  $J = 7.3$  Hz, 1 H), 7.57 (s, 1 H), 7.57 – 7.53 (m, 2 H), 7.52 – 7.46 (m, 2 H), 7.18 (d,  $J = 3.9$  Hz, 1 H), 6.85 (d,  $J = 3.8$  Hz, 1 H);  $^{13}\text{C}$  NMR (126 MHz,  $\text{CDCl}_3$ )  $\delta$  166.09, 135.27, 133.87, 132.92, 132.29, 131.30, 130.34, 129.26, 129.00, 128.69, 127.37, 125.30, 121.07, 117.55, 107.68, 104.01 ppm. HRMS (ESI) Calcd for  $[\text{C}_{16}\text{H}_9\text{ClN}_2\text{O}+\text{H}]^+$ : 281.0476, Found: 281.0481.

**Methyl 2-(1-(2-chlorobenzoyl)-1H-indol-3-yl)acetate (S14)**

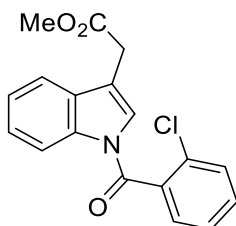

$^1\text{H}$  NMR (500 MHz,  $\text{CDCl}_3$ )  $\delta$  8.45 (br, 1 H), 7.59 (d,  $J = 7.4$  Hz, 1 H), 7.55 – 7.50 (m, 3 H), 7.48 – 7.41 (m, 2 H), 7.38 (t,  $J = 7.6$  Hz, 1 H), 7.00 (br, 1 H), 3.71 (s, 3 H), 3.70 (s, 2 H);  $^{13}\text{C}$  NMR (126 MHz,  $\text{CDCl}_3$ )  $\delta$  171.12, 165.75, 135.65, 134.75, 131.77, 131.73, 131.28, 130.74, 130.18, 128.92, 127.17, 125.66, 125.06, 124.41, 119.15, 115.67, 52.23, 30.83 ppm. HRMS (ESI) Calcd for  $[\text{C}_{18}\text{H}_{14}\text{ClNO}_3+\text{H}]^+$ : 328.0735, Found: 328.0741.

***tert*-Butyl (2-(1-(2-chlorobenzoyl)-1H-indol-3-yl)ethyl)carbamate (S15)**

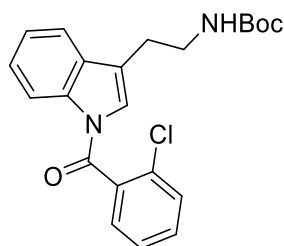

$^1\text{H}$  NMR (500 MHz,  $\text{CDCl}_3$ )  $\delta$  8.52 (br, 1 H), 7.58 (d,  $J = 7.8$  Hz, 1 H), 7.56–7.48 (m, 3 H), 7.49–7.41 (m, 1 H), 7.42 (t,  $J = 5.0$  Hz, 1 H), 7.37 (t,  $J = 7.4$  Hz, 1 H), 6.80 (br, 1H), 4.68 (br, 1 H), 3.43–3.38 (m, 2 H), 2.86 (t,  $J = 7.1$  Hz, 2 H), 1.43 (s, 9 H);  $^{13}\text{C}$  NMR (126 MHz,  $\text{CDCl}_3$ )  $\delta$  165.67, 155.87, 135.84, 134.91, 131.69, 131.17, 131.07, 130.15, 128.87, 127.23, 125.57, 124.31, 123.80, 120.44, 119.05, 116.73, 79.34, 39.97, 28.39, 25.53 ppm. HRMS (ESI) Calcd for  $[\text{C}_{22}\text{H}_{23}\text{ClN}_2\text{O}_3+\text{H}]^+$ : 399.1470, Found: 399.1464.

**(*S*)-Methyl *N*-(*tert*-butoxycarbonyl)-1-(2-chlorobenzoyl)-*L*-tryptophanate (S16)**

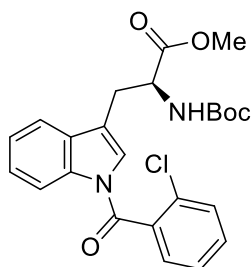

$^1\text{H}$  NMR (500 MHz,  $\text{CDCl}_3$ )  $\delta$  8.46 (br, 1 H), 7.60 – 7.52 (m, 3 H), 7.51 (s, 1 H), 7.49 – 7.43 (m, 1 H), 7.42 (t,  $J = 7.3$  Hz, 1 H), 7.36 (t,  $J = 7.5$  Hz, 1 H), 6.77 (br, 1 H), 5.12 (d,  $J = 7.5$  Hz, 1 H), 4.64 – 4.60 (m, 1 H), 3.63 (s, 3 H),  $\delta$  3.23 (dd,  $J = 14.2, 5.0$  Hz, 1 H), 3.15 (dd,  $J = 14.4, 4.5$  Hz, 1 H), 1.42 (s, 9 H);  $^{13}\text{C}$  NMR (126 MHz,  $\text{CDCl}_3$ )  $\delta$  172.10, 165.64, 154.97, 135.61, 134.84, 131.75, 131.19, 130.12, 128.91, 127.22, 125.65, 124.68, 124.35, 119.04, 117.83, 116.64, 80.02, 53.47, 52.36, 28.30, 27.75 ppm. HRMS (ESI) Calcd for  $[\text{C}_{24}\text{H}_{25}\text{ClN}_2\text{O}_5+\text{H}]^+$ : 457.1525, Found: 457.1518.

**(2-Iodophenyl)(3-methyl-1H-indol-1-yl)methanone (S17)<sup>5</sup>**

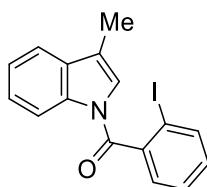

$^1\text{H}$  NMR (400 MHz,  $\text{CDCl}_3$ )  $\delta$  8.57 (br, 1 H), 7.97 (d,  $J = 8.0$  Hz, 1 H), 7.55 (d,  $J = 7.0$  Hz, 1 H), 7.52 (d,  $J = 7.5$  Hz, 1 H), 7.44 (dd,  $J = 7.6, 1.7$  Hz, 1 H), 7.39 (d,  $J = 7.3$  Hz, 2 H), 7.25 (d,  $J = 7.6$  Hz, 1 H), 6.68 (br, 1 H), 2.25 (s, 3 H) ppm.

**(2-Chlorophenyl)(2-methyl-1H-indol-1-yl)methanone (S18)**<sup>7</sup>

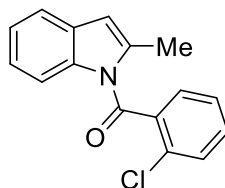

<sup>1</sup>H NMR (400 MHz, CDCl<sub>3</sub>) δ 8.57 (br, 1 H), 7.97 (d, *J* = 7.6 Hz, 1 H), 7.60 – 7.49 (m, 2 H), 7.45 – 7.36 (m, 3 H), 7.26 (t, *J* = 7.8 Hz, 1 H), 6.67 (br, 1 H), 2.25 (s, 3 H) ppm.

**(2-Chloro-6-fluorophenyl)(1H-indol-1-yl)methanone (S20)**

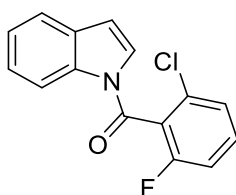

<sup>1</sup>H NMR (500 MHz, CDCl<sub>3</sub>) δ 8.67 (d, *J* = 8.3 Hz, 1 H), 7.62 (d, *J* = 7.8 Hz, 1 H), 7.50 (t, *J* = 8.5 Hz, 1 H), 7.48 (t, *J* = 8.1 Hz, 1 H), 7.40 (d, *J* = 7.4 Hz, 1 H), 7.36 (d, *J* = 8.3 Hz, 1 H), 7.19 (t, *J* = 8.4 Hz, 1 H), 6.92 (d, *J* = 3.1 Hz, 1 H), 6.65 (d, *J* = 3.4 Hz, 1 H); <sup>19</sup>F NMR (376 MHz, CDCl<sub>3</sub>) δ -111.51 (dd, *J* = 11.3, 7.5 Hz); <sup>13</sup>C NMR (126 MHz, CDCl<sub>3</sub>) δ 161.31, 159.32 (d, *J* = 253.0 Hz), 135.44, 132.48 (d, *J* = 5.2 Hz), 132.19 (d, *J* = 8.8 Hz), 131.08, 125.90, 125.79, 125.57, 124.77, 123.83 (d, *J* = 22.0 Hz), 121.05, 116.91, 114.73 (d, *J* = 21.1 Hz), 110.47 ppm. HRMS (ESI) Calcd for [C<sub>15</sub>H<sub>9</sub>FCINO+H]<sup>+</sup>: 274.0429, Found: 274.0426.

**(2,4-Dichlorophenyl)(1H-indol-1-yl)methanone (S21)**

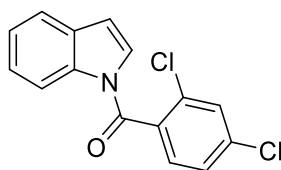

<sup>1</sup>H NMR (500 MHz, CDCl<sub>3</sub>) δ 8.44 (br, 1 H), 7.62 (d, *J* = 7.7 Hz, 1 H), 7.57 (d, *J* = 1.8 Hz, 1 H), 7.48 (d, *J* = 8.2 Hz, 1 H), 7.46 (d, *J* = 1.9 Hz, 1 H), 7.44 – 7.40 (m, 1 H), 7.37 (t, *J* = 7.5 Hz, 1 H), 6.98 (br, 1 H), 6.65 (d, *J* = 3.8 Hz, 1 H); <sup>13</sup>C NMR (126 MHz, CDCl<sub>3</sub>) δ 165.06, 137.29, 135.41, 133.27, 132.35, 131.03, 130.14, 129.84, 127.64, 126.33, 125.45, 124.58, 121.10, 116.50, 110.15 ppm. HRMS (ESI) Calcd for [C<sub>15</sub>H<sub>9</sub>Cl<sub>2</sub>NO+H]<sup>+</sup>: 290.0134, Found: 290.0131.

**(1H-Indol-1-yl)(2,4,6-trichlorophenyl)methanone (S21')**

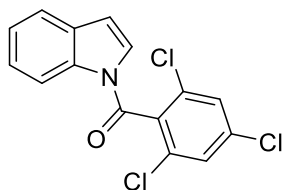

$^1\text{H}$  NMR (500 MHz,  $\text{CDCl}_3$ )  $\delta$  8.66 (dd,  $J = 8.2, 1.0$  Hz, 1 H), 7.63 (d,  $J = 7.7$  Hz, 1 H), 7.49 (s, 2 H), 7.47 (t,  $J = 8.4$  Hz, 1 H), 7.39 (t,  $J = 7.5$  Hz, 1 H), 6.84 (d,  $J = 3.8$  Hz, 1 H), 6.67 (d,  $J = 3.8$  Hz, 1 H);  $^{13}\text{C}$  NMR (126 MHz,  $\text{CDCl}_3$ )  $\delta$  162.25, 136.97, 135.26, 133.21, 133.14, 132.85, 131.08, 128.43, 128.40, 125.70, 125.35, 124.91, 121.12, 116.91, 110.93 ppm. HRMS (ESI) Calcd for  $[\text{C}_{15}\text{H}_8\text{Cl}_3\text{NO}+\text{H}]^+$ : 323.9744, Found: 323.9743.

**(2-Chloro-4-methoxyphenyl)(1H-indol-1-yl)methanone (S23)**

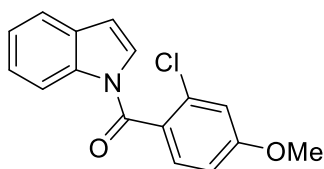

$^1\text{H}$  NMR (500 MHz,  $\text{CDCl}_3$ )  $\delta$  8.30 (br, 1 H), 7.50 (d,  $J = 7.7$  Hz, 1 H), 7.36 (d,  $J = 8.5$  Hz, 1 H), 7.30 (t,  $J = 7.3$  Hz, 1 H), 7.24 (td,  $J = 7.6, 0.9$  Hz, 1 H), 6.97 (d,  $J = 3.6$  Hz, 1 H), 6.95 (d,  $J = 2.4$  Hz, 1 H), 6.85 (dd,  $J = 8.5, 2.4$  Hz, 1 H), 6.52 (dd,  $J = 3.8, 0.7$  Hz, 1 H), 3.80 (s, 3 H);  $^{13}\text{C}$  NMR (126 MHz,  $\text{CDCl}_3$ )  $\delta$  166.09, 161.74, 135.52, 132.76, 131.06, 130.37, 127.04, 126.93, 125.15, 124.21, 120.95, 116.43, 115.45, 113.12, 109.36, 55.81 ppm. HRMS (ESI) Calcd for  $[\text{C}_{16}\text{H}_{12}\text{ClNO}_2+\text{H}]^+$ : 286.0629, Found: 286.0626.

**(2-Chloro-4-fluorophenyl)(1H-indol-1-yl)methanone (S24)**

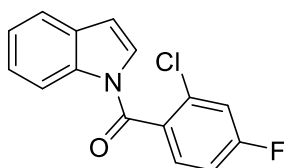

$^1\text{H}$  NMR (400 MHz,  $\text{CDCl}_3$ )  $\delta$  8.43 (br, 1 H), 7.62 (d,  $J = 7.6$  Hz, 1 H), 7.56 – 7.53 (m, 1 H), 7.43 (t,  $J = 7.7$  Hz, 1 H), 7.36 (t,  $J = 7.5$  Hz, 1 H), 7.30 (dd,  $J = 8.6, 2.5$  Hz, 1 H), 7.18 (td,  $J = 8.2, 2.4$  Hz, 1 H), 6.99 (br, 1 H), 6.65 (d,  $J = 3.8$  Hz, 1 H);  $^{19}\text{F}$  NMR (376 MHz,  $\text{CDCl}_3$ )  $\delta$  -106.53 (m);  $^{13}\text{C}$  NMR (126 MHz,  $\text{CDCl}_3$ )  $\delta$  165.19, 163.45 (d,  $J = 254.7$  Hz), 135.45, 132.86 (d,  $J = 10.5$  Hz), 131.17 (d,  $J = 4.0$  Hz), 131.05, 130.56 (d,  $J = 9.4$  Hz), 126.45, 125.40, 124.53, 121.09, 117.79 (d,  $J = 25.0$  Hz), 116.48, 114.78 (d,  $J = 21.8$  Hz), 110.03 ppm. HRMS (ESI) Calcd for  $[\text{C}_{15}\text{H}_9\text{ClFNO}+\text{H}]^+$ : 274.0429, Found: 274.0426.



**(2-Chloro-5-(trifluoromethyl)phenyl)(1H-indol-1-yl)methanone (S25)**

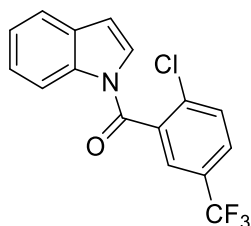

$^1\text{H}$  NMR (500 MHz,  $\text{CDCl}_3$ )  $\delta$  8.56 (br, 1 H), 7.84 (d,  $J = 2.1$  Hz, 1 H), 7.78 (dd,  $J = 8.5, 2.3$  Hz, 1 H), 7.69 (d,  $J = 8.5$  Hz, 1 H), 7.63 (d,  $J = 7.8$  Hz, 1 H), 7.45 (t,  $J = 7.9$  Hz, 1 H), 7.39 (t,  $J = 7.4$  Hz, 1 H), 6.92 (br, 1 H), 6.68 (d,  $J = 3.8$  Hz, 1 H);  $^{19}\text{F}$  NMR (376 MHz,  $\text{CDCl}_3$ )  $\delta$  -62.65;  $^{13}\text{C}$  NMR (126 MHz,  $\text{CDCl}_3$ )  $\delta$  164.42, 135.56, 135.42, 135.19 (q,  $J = 1.3$  Hz), 131.05, 130.89, 129.95 (q,  $J = 33.8$  Hz), 128.43 (q,  $J = 3.7$  Hz), 126.05, 126.03 (q,  $J = 4.0$  Hz), 125.62, 124.79, 123.18 (q,  $J = 272.6$  Hz), 121.19, 116.55, 110.63 ppm. HRMS (ESI) Calcd for  $[\text{C}_{16}\text{H}_9\text{ClF}_3\text{NO}+\text{H}]^+$ : 324.0398, Found: 324.0391.

**(2-Chloro-4-nitrophenyl)(1H-indol-1-yl)methanone (S26)**

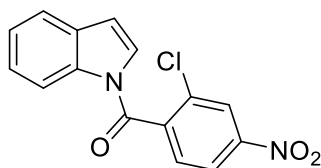

$^1\text{H}$  NMR (500 MHz,  $\text{CDCl}_3$ )  $\delta$  8.57 (br, 1 H), 8.43 (d,  $J = 1.8$  Hz, 1 H), 8.32 (d,  $J = 8.4, 1.7$  Hz, 1 H), 7.74 (d,  $J = 8.4$  Hz, 1 H), 7.63 (d,  $J = 7.7$  Hz, 1 H), 7.46 (s, 1 H), 7.39 (t,  $J = 7.4$  Hz, 1 H), 6.86 (br, 1 H), 6.69 (d,  $J = 3.8$  Hz, 1 H);  $^{13}\text{C}$  NMR (126 MHz,  $\text{CDCl}_3$ )  $\delta$  163.88, 149.19, 140.31, 135.34, 132.77, 131.00, 129.75, 125.79, 125.63, 125.44, 125.00, 122.37, 121.29, 116.65, 111.06 ppm. HRMS (ESI) Calcd for  $[\text{C}_{15}\text{H}_9\text{ClN}_2\text{O}_3+\text{H}]^+$ : 300.0302, Found: 300.0304

**(3-(2-Bromoethyl)-1H-indol-1-yl)(2-chlorophenyl)methanone (S27)**

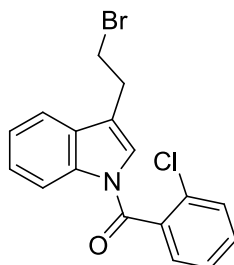

$^1\text{H}$  NMR (400 MHz,  $\text{CDCl}_3$ )  $\delta$  8.48 (br, 1 H), 7.58 (d,  $J = 8.2$  Hz, 1 H), 7.55 – 7.51 (m, 3 H), 7.49 – 7.33 (m, 3 H), 6.93 (br, 1 H), 3.62 (t,  $J = 7.4$  Hz, 2 H), 3.25 (t,  $J = 7.4$  Hz, 2 H);  $^{13}\text{C}$  NMR (101 MHz,  $\text{CDCl}_3$ )  $\delta$  165.71, 135.79, 134.82, 131.81, 131.25, 130.64, 130.22, 128.92,

127.27, 125.68, 124.39, 124.15, 120.40, 118.77, 116.79, 31.17, 28.81 ppm. HRMS (ESI) Calcd for  $[C_{17}H_{13}BrClNO+H]^+$ : 361.9942, Found: 361.9939.

**(2-Chlorophenyl)(5-nitro-1H-indol-1-yl)methanone (S28)**

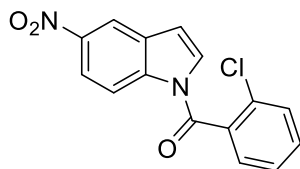

$^1H$  NMR (500 MHz,  $CDCl_3$ )  $\delta$  8.53 (br, 1 H), 8.49 (s, 1 H), 8.27 (d,  $J = 8.9$  Hz, 1 H), 7.56 (d,  $J = 6.8$  Hz, 3 H), 7.50 – 7.46 (m, 1 H), 7.16 (d,  $J = 3.5$  Hz, 1 H), 6.75 (d,  $J = 3.5$  Hz, 1 H);  $^{13}C$  NMR (126 MHz,  $CDCl_3$ )  $\delta$  166.10, 144.70, 138.41, 133.74, 132.40, 131.27, 131.06, 130.35, 129.56, 129.05, 127.44, 120.49, 117.17, 116.62, 109.89 ppm. HRMS (ESI) Calcd for  $[C_{15}H_9ClNO_2+H]^+$ : 301.0374, Found: 301.0380.

**(2-Chlorophenyl)(1H-pyrrolo[2,3-b]pyridin-1-yl)methanone (S29)**

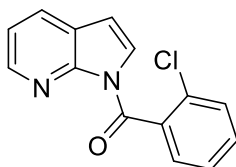

$^1H$  NMR (400 MHz,  $CDCl_3$ )  $\delta$  8.22 (dd,  $J = 4.5, 1.7$  Hz, 1 H), 7.87 (dd,  $J = 7.8, 1.7$  Hz, 1 H), 7.70 (d,  $J = 4.5$  Hz, 1 H), 7.55 – 7.50 (m, 1 H), 7.48 – 7.45 (m, 2 H), 7.41 – 7.39 (m, 1 H), 7.16 (dd,  $J = 7.8, 4.0$  Hz, 1 H), 6.65 (d,  $J = 4.0$  Hz, 1 H);  $^{13}C$  NMR (101 MHz,  $CDCl_3$ )  $\delta$  165.04, 147.98, 144.83, 135.41, 131.57, 131.43, 129.73, 129.25, 128.98, 126.94, 126.07, 123.48, 119.42, 107.21 ppm.

**1-(2-Chlorobenzoyl)-1H-indole-3-carbaldehyde (S30)**

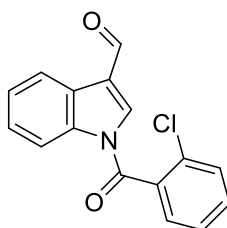

$^1H$  NMR (500 MHz,  $CDCl_3$ )  $\delta$  10.04 (s, 1 H), 8.42 (d,  $J = 8.1$  Hz, 1 H), 8.33 (d,  $J = 7.0$  Hz, 1 H), 7.65 (s, 1 H), 7.62 – 7.57 (m, 3 H), 7.53-7.50 (m, 2 H), 7.48 (td,  $J = 7.4, 1.4$  Hz, 1 H);  $^{13}C$  NMR (126 MHz,  $CDCl_3$ )  $\delta$  185.79, 166.17, 136.68, 136.26, 133.48, 132.60, 131.41, 130.50, 129.19, 127.54, 127.03, 126.56, 126.01, 123.21, 122.18, 116.35 ppm. HRMS (ESI) Calcd for  $[C_{16}H_{10}ClNO_2+H]^+$ : 284.0473, Found: 284.0479.

#### 4-Bromo-1-(2-chlorobenzoyl)-1H-indole-3-carbaldehyde (S31)

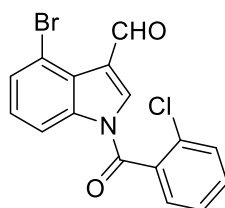

$^1\text{H}$  NMR (500 MHz,  $\text{CDCl}_3$ )  $\delta$  10.97 (s, 1 H), 8.60 (d,  $J = 8.3$  Hz, 1 H), 7.78 (s, 1 H), 7.67 (d,  $J = 7.8$  Hz, 1 H), 7.62 – 7.56 (m, 2 H), 7.56 – 7.52 (m, 1 H), 7.52 – 7.46 (m, 1 H), 7.37 (t,  $J = 8.1$  Hz, 1 H);  $^{13}\text{C}$  NMR (126 MHz,  $\text{CDCl}_3$ )  $\delta$  186.84, 166.47, 137.39, 133.00, 132.79, 132.41, 131.42, 130.58, 129.90, 129.17, 127.55, 127.37, 127.11, 122.72, 116.01, 113.55 ppm. HRMS (ESI) Calcd for  $[\text{C}_{16}\text{H}_9\text{BrClNO}_2+\text{H}]^+$ : 361.9578, Found: 361.9574.

#### (3-Chloropyridin-4-yl)(1H-indol-1-yl)methanone (S32)

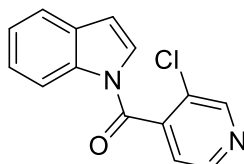

$^1\text{H}$  NMR (400 MHz,  $\text{CDCl}_3$ )  $\delta$  8.81 (s, 1 H), 8.72 (d,  $J = 4.9$  Hz, 1 H), 8.54 (br, 1 H), 7.62 (d,  $J = 7.7$  Hz, 1 H), 7.45 (m, 2 H), 7.39 (t,  $J = 7.6$  Hz, 1 H), 6.89 (br, 1 H), 6.68 (d,  $J = 3.8$  Hz, 1 H);  $^{13}\text{C}$  NMR (101 MHz,  $\text{CDCl}_3$ )  $\delta$  163.41, 150.45, 148.33, 141.55, 135.32, 131.01, 128.37, 125.74, 124.96, 122.28, 121.24, 116.64, 110.97 ppm. HRMS (ESI) Calcd for  $[\text{C}_{14}\text{H}_9\text{ClN}_2\text{O}+\text{H}]^+$ : 257.0476, Found: 257.0470.

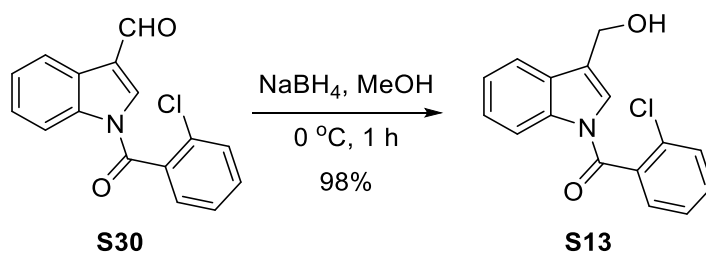

In a 50 mL round-bottom flask charged with a magnetic stirring bar, the suspension of indole derivative (2-chlorophenyl)(3-formyl-1H-indol-1-yl) methanone (1 equiv) in MeOH was cooled down to 0 °C with ice bath.  $\text{NaBH}_4$  (4 equiv) was added slowly. Then the mixture was stirred for 1 h. TLC indicated the substrate was consumed completely. The mixture was quenched with water, extracted with  $\text{CH}_2\text{Cl}_2$  (3 times). The combined organic layer was washed with brine, dried over sodium sulfate. The solvent was removed under reduced pressure. The residue was purified with flash column chromatography (PE:EA = 3:1) to afford the product in 98% yield.

**(2-Chlorophenyl)(3-(hydroxymethyl)-1H-indol-1-yl)methanone (S13)**

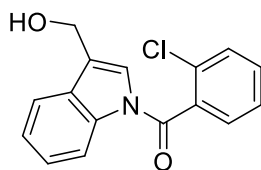

$^1\text{H}$  NMR (500 MHz,  $\text{CDCl}_3$ )  $\delta$  8.33 (br, 1 H), 7.51 (d,  $J = 7.7$  Hz, 1 H), 7.36 (d,  $J = 5.9$  Hz, 2 H), 7.33 (d,  $J = 7.4$  Hz, 1 H), 7.28 (m, 2 H), 7.23 (t,  $J = 7.5$  Hz, 1 H), 6.82 (br, 1 H), 4.63 (s, 2 H), 2.10 (br, 1 H);  $^{13}\text{C}$  NMR (126 MHz,  $\text{CDCl}_3$ )  $\delta$  166.02, 136.05, 134.66, 131.78, 131.13, 130.16, 129.81, 128.78, 127.22, 125.76, 124.50, 123.95, 123.17, 119.48, 116.73, 57.03 ppm. HRMS (ESI) Calcd for  $[\text{C}_{16}\text{H}_{12}\text{ClNO}_2 + \text{H}]^+$ : 286.0629, Found: 286.0636.

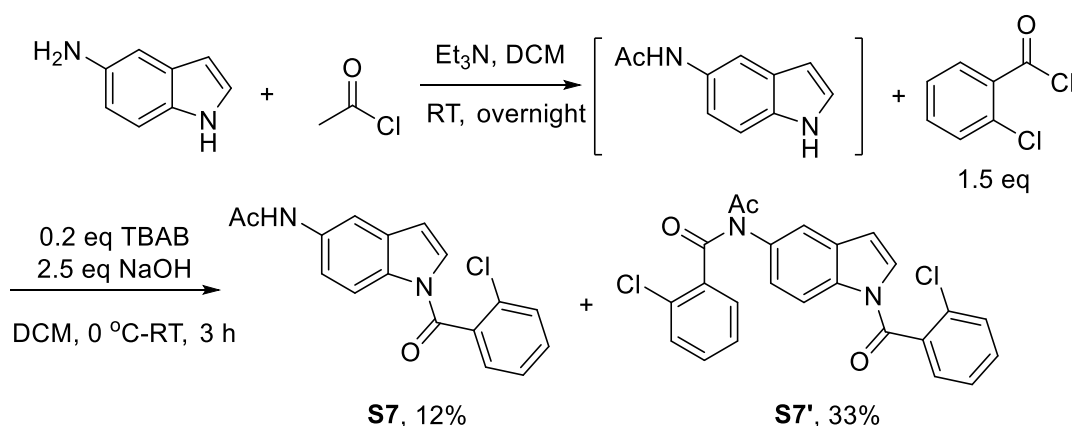

In a 50 mL round-bottom flask charged with a magnetic stirring bar, to the solution of 5-aminoindole (1 equiv) and triethylamine (1.5 equiv) in  $\text{CH}_2\text{Cl}_2$  (10 mL), acetyl chloride (1.2 equiv) was added. The mixture was stirred at room temperature overnight. TLC indicated the substrate was consumed completely. The mixture was quenched with water (10 mL) and extracted with  $\text{CH}_2\text{Cl}_2$  (3 times). The combined organic layer was washed with brine, dried over sodium sulfate. The solvent was removed under reduced pressure to afford the product. The product was subjected to next step without further purification.

A  $\text{CH}_2\text{Cl}_2$  solution of 2-chlorobenzoyl chloride (1.5 equiv) was added dropwise to a solution of the above indole derivative (1 equiv), NaOH (2.5 equiv) and tetrabutylammonium bromide (TBAB, 0.2 equiv) in  $\text{CH}_2\text{Cl}_2$  (15 mL) at 0 °C. The mixture was stirred at 0 °C for 0.5 h. Then the mixture was warmed to room temperature. And another 0.5 equivalent of 2-chlorobenzoyl chloride was added. The mixture was stirred at room temperature for 2.5 h. Water was added to quench the reaction and extracted with  $\text{CH}_2\text{Cl}_2$  (3 times). The combined organic layer was washed with brine, dried over  $\text{Na}_2\text{SO}_4$ . The solvent was removed under reduced pressure. The residue was purified by flash column chromatography (PE:EA from 4:1 to 1:1).

***N*-(1-(2-Chlorobenzoyl)-1H-indol-5-yl)acetamide (S7)**

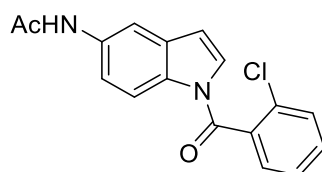

$^1\text{H}$  NMR (500 MHz,  $\text{CDCl}_3$ )  $\delta$  8.37 (br, 1 H), 8.03 (d,  $J = 2.1$  Hz, 1 H), 7.52-7.48 (m, 3 H), 7.43 (dd,  $J = 7.0, 1.9$  Hz, 1 H), 7.40 (m, 1 H), 7.22 (d,  $J = 8.7$  Hz, 1 H), 6.95 (br, 1 H), 6.57 (d,  $J = 3.6$  Hz, 1 H), 2.21 (s, 3 H);  $^{13}\text{C}$  NMR (126 MHz,  $\text{CDCl}_3$ )  $\delta$  167.34, 164.76, 133.61, 133.44, 131.20, 130.70, 130.64, 130.25, 129.11, 127.85, 126.41, 126.11, 116.67, 115.72, 111.46, 108.96, 23.63 ppm. HRMS (ESI) Calcd for  $[\text{C}_{17}\text{H}_{13}\text{ClN}_2\text{O}_2+\text{H}]^+$ : 313.0738, Found: 313.0738.

***N*-Acetyl-2-chloro-*N*-(1-(2-chlorobenzoyl)-1H-indol-5-yl)benzamide (S7')**

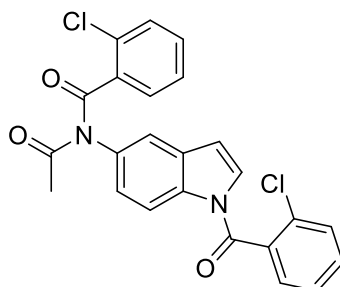

$^1\text{H}$  NMR (400 MHz,  $\text{CDCl}_3$ )  $\delta$  8.47 (br, 1 H), 7.68 – 7.37 (m, 7 H), 7.29 (s, 3 H), 7.03 (s, 1 H), 6.61 (d,  $J = 3.3$  Hz, 1 H), 2.40 (s, 3 H);  $^{13}\text{C}$  NMR (101 MHz,  $\text{CDCl}_3$ )  $\delta$  172.98, 170.02, 165.94, 136.54, 135.15, 134.52, 134.31, 131.96, 131.89, 131.26, 130.73, 130.23, 129.69, 129.57, 128.91, 128.61, 128.02, 127.23, 126.87, 125.56, 121.19, 117.48, 109.49, 26.09 ppm. HRMS (ESI) Calcd for  $[\text{C}_{24}\text{H}_{16}\text{Cl}_2\text{N}_2\text{O}_3+\text{H}]^+$ : 451.0611, Found: 451.0619.

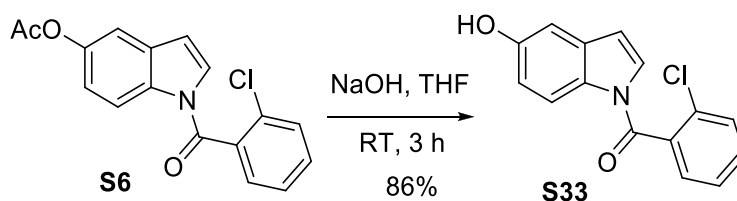

In a 50 mL round-bottom flask, indole derivative **S6** (1.0 mmol) was dissolved in THF (25 mL). A solution of the aqueous NaOH (2 M, 4 mL) was added. The mixture was stirred at room temperature for 3 h. TLC indicated the substrate was consumed. Water (10 mL) was added and extracted with  $\text{CH}_2\text{Cl}_2$  ( $3 \times 10$  mL). The combined organic layer was washed with brine, dried over  $\text{Na}_2\text{SO}_4$ . The solvent was removed under reduced pressure. The residue was purified by flash column chromatography (PE:EA = 10:1 – 5:1).

**(2-Chlorophenyl)(5-hydroxy-1H-indol-1-yl)methanone (S33)**

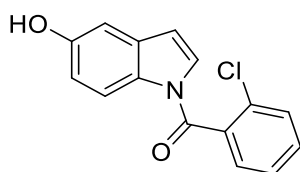

$^1\text{H}$  NMR (500 MHz,  $\text{CDCl}_3$ )  $\delta$  8.39 (br, 1 H), 7.52 (s, 3 H), 7.44 (d,  $J = 6.6$  Hz, 1 H), 7.02 (s, 1 H), 6.94 (d,  $J = 7.6$  Hz, 2 H), 6.51 (s, 1 H), 5.69 (br, 1 H);  $^{13}\text{C}$  NMR (126 MHz,  $\text{CDCl}_3$ )  $\delta$  165.86, 153.00, 134.68, 132.40, 131.70, 131.26, 130.13, 128.87, 127.55, 127.15, 117.33, 113.81, 109.71, 106.38 ppm. HRMS (ESI) Calcd for  $[\text{C}_{15}\text{H}_{10}\text{ClNO}_2+\text{H}]^+$ : 272.0473, Found: 272.0478.

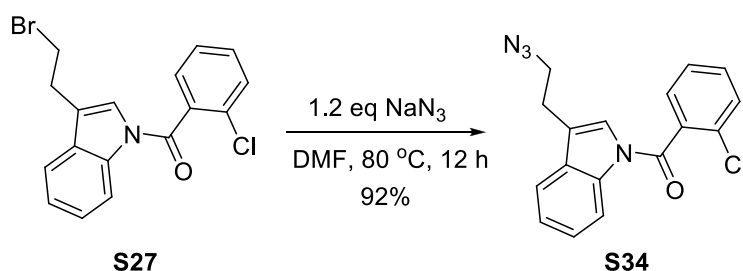

In a 50 mL round-bottom flask charged with a magnetic stirring bar, to the solution of (3-(2-bromoethyl)-1H-indol-1-yl)(2-chlorophenyl)methanone (1 equiv) and  $\text{NaN}_3$  (1.2 equiv) in DMF (10 mL). The mixture was heated to 80 °C for 12 h. TLC indicated the substrate was consumed completely. The mixture was quenched with water (10 mL) and extracted with  $\text{CH}_2\text{Cl}_2$  (3 times). The combined organic layer was washed with brine, dried over sodium sulfate. The solvent was removed under reduced pressure. The residue was purified by flash column chromatography (PE:EA = 10:1) to afford the product in 92% yield.

**(3-(2-Azidoethyl)-1H-indol-1-yl)(2-chlorophenyl)methanone (S34)**

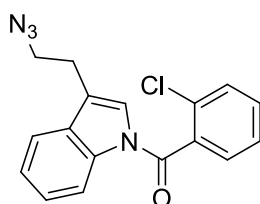

$^1\text{H}$  NMR (400 MHz,  $\text{CDCl}_3$ )  $\delta$  8.47 (br, 1 H), 7.74 – 7.50 (m, 4 H), 7.50–7.34 (m, 3 H), 6.89 (br, 1 H), 3.57 (t,  $J = 7.1$  Hz, 2 H), 2.97 (t,  $J = 6.9$  Hz, 2 H);  $^{13}\text{C}$  NMR (101 MHz,  $\text{CDCl}_3$ )  $\delta$  165.66, 135.80, 134.85, 131.74, 131.26, 130.78, 130.20, 128.89, 127.23, 125.67, 124.35, 124.07, 119.52, 118.77, 116.80, 50.61, 24.87 ppm. HRMS (ESI) Calcd for  $[\text{C}_{17}\text{H}_{13}\text{ClN}_4\text{O}+\text{H}]^+$ : 325.0851, Found: 325.0847.

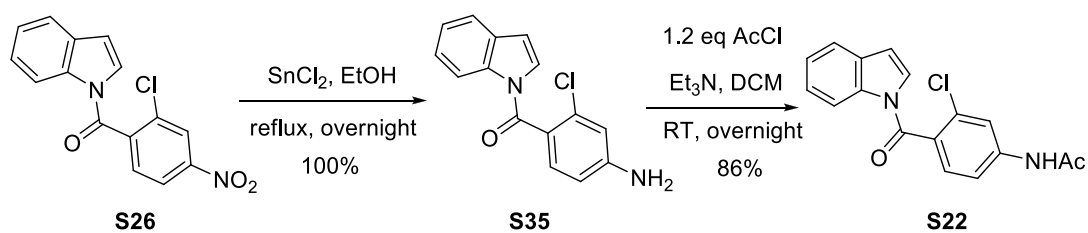

In a 50 mL Schlenk tube charged with a magnetic stirring bar, indole derivative (660 mg) and  $\text{SnCl}_2 \cdot 2\text{H}_2\text{O}$  (2.48 g, 5 eq) were added. Then, the Schlenk tube was evacuated and back-filled with argon three times. Anhydrous ethanol (20 mL) was added, the mixture was heated to reflux overnight. TLC indicated the substrate was consumed completely. The solvent was poured into ice-water. 2 M NaOH was added. Filtration over Celite and the filtrate was extracted with  $\text{CH}_2\text{Cl}_2$ , washed with brine, dried with sodium sulfate. The solvent was removed under reduced pressure. The residue was purified with flash column chromatography (PE:EA = 3:1 to 1:1) to obtain the product in 100% yield.

In a 50 mL round-bottom flask charged with a magnetic stirring bar, (4-amino-2-chlorophenyl)(1H-indol-1-yl)methanone (360 mg) was dissolved in DCM (20 mL), acetyl chloride (1.2 eq) and  $\text{Et}_3\text{N}$  (1.5 eq) were added. The mixture was stirred at room temperature overnight. TLC indicated the substrate was consumed completely. The reaction was quenched with water and extracted with  $\text{CH}_2\text{Cl}_2$  (15 mL  $\times$  3), washed with brine and dried with anhydrous sodium sulfate. The solvent was removed under reduced pressure. The residue was purified with flash column chromatography (PE:EA = 3:1 to 1:1) to obtain the product in 86% yield.

#### (4-Amino-2-chlorophenyl)(1H-indol-1-yl)methanone (S35)

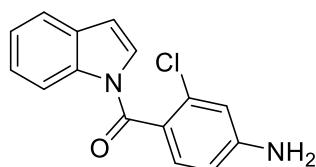

$^1\text{H}$  NMR (500 MHz,  $\text{CDCl}_3$ )  $\delta$  8.37 (d,  $J = 8.2$  Hz, 1 H), 7.60 (d,  $J = 7.6$  Hz, 1 H), 7.39 (t,  $J = 7.7$  Hz, 1 H), 7.33 (dd,  $J = 7.5, 1.1$  Hz, 1 H), 7.31 (d,  $J = 8.3$  Hz, 1 H), 7.16 (d,  $J = 3.8$  Hz, 1 H), 6.77 (d,  $J = 2.3$  Hz, 1 H), 6.65 (dd,  $J = 8.3, 2.2$  Hz, 1 H), 6.61 (dd,  $J = 3.8, 0.8$  Hz, 1 H), 4.10 (br, 2 H);  $^{13}\text{C}$  NMR (126 MHz,  $\text{CDCl}_3$ )  $\delta$  166.58, 149.67, 135.57, 133.03, 131.05, 130.92, 127.26, 124.96, 123.99, 123.84, 120.88, 116.35, 115.34, 112.87, 108.90 ppm. HRMS (ESI) Calcd for  $[\text{C}_{15}\text{H}_{11}\text{ClN}_2\text{O}+\text{H}]^+$ : 271.0633, Found: 271.0629.

### ***N*--(3-Chloro-4-(1*H*-indole-1-carbonyl)phenyl)acetamide (S22)**

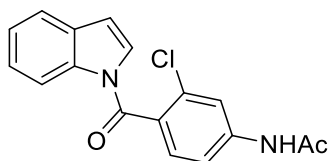

$^1\text{H}$  NMR (500 MHz,  $\text{CDCl}_3$ )  $\delta$  8.40 (br, 1 H), 8.33 (s, 1 H), 7.79 (d,  $J = 2.0$  Hz, 1 H), 7.60 (d,  $J = 7.6$  Hz, 1 H), 7.52 (dd,  $J = 8.3, 1.8$  Hz, 1 H), 7.42 - 7.39 (m, 2 H), 7.35 (td,  $J = 7.6, 0.9$  Hz, 1 H), 7.02 (d,  $J = 3.7$  Hz, 1 H), 6.62 (d,  $J = 3.7$  Hz, 1 H), 2.24 (s, 3 H) ppm.  $^{13}\text{C}$  NMR (101 MHz,  $\text{CDCl}_3$ )  $\delta$  169.19, 166.19, 141.13, 135.43, 131.96, 131.13, 129.75, 129.48, 126.77, 125.31, 124.49, 121.11, 120.72, 117.93, 116.40, 109.94, 24.60 ppm. HRMS (ESI) Calcd for  $[\text{C}_{17}\text{H}_{13}\text{ClN}_2\text{O}_2+\text{H}]^+$ : 313.0738, Found: 313.0732.

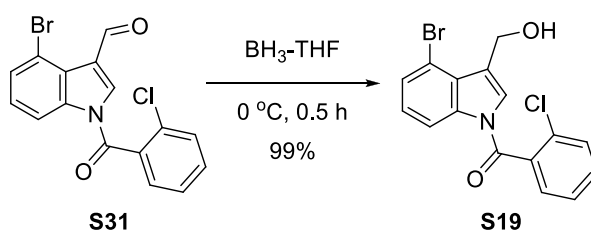

In a 50 mL round-bottom flask charged with a magnetic stirring bar, indole derivative 4-bromo-1-(2-chlorobenzoyl)-1*H*-indole-3-carbaldehyde (800 mg) was dissolved in THF (15 mL). The mixture was cooled to 0 °C with ice-bath,  $\text{BH}_3\text{-THF}$  (1 M, 6 mL) was added dropwise. After 0.5 h, TLC indicated the substrate was consumed completely. The mixture was quenched with MeOH. The solvent was removed under reduced pressure. The residue was purified with flash column chromatography (PE:EA = 2:1) to afford the product respectively in 99% yield.

### **(4-Bromo-3-(hydroxymethyl)-1*H*-indol-1-yl)(2-chlorophenyl)methanone (S19)**

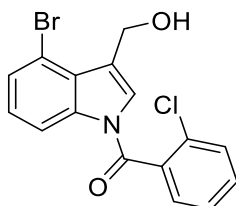

$^1\text{H}$  NMR (500 MHz,  $\text{CDCl}_3$ )  $\delta$  8.54 (br, 1 H), 7.57–7.49 (m, 4 H), 7.47 - 7.44 (m, 1 H), 7.34 – 7.26 (m, 1 H, overlapped with signal of  $\text{CHCl}_3$  residue), 7.04 (s, 1 H), 4.97 (s, 2 H), 2.09 (s, 1 H);  $^{13}\text{C}$  NMR (126 MHz,  $\text{CDCl}_3$ )  $\delta$  165.83, 137.53, 134.26, 132.00, 131.24, 130.27, 128.87, 128.74, 128.55, 127.27, 126.65, 126.11, 123.14, 116.05, 113.55, 57.31 ppm. HRMS (ESI) Calcd for  $[\text{C}_{16}\text{H}_{11}\text{ClBrNO}_2+\text{H}]^+$ : 363.9734, Found: 363.9730.



**General procedure for metal- and photocatalyst-free photoinduced dearomatization reaction of indole derivatives:**

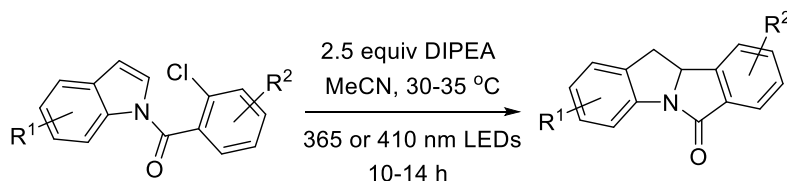

In a 10 mL test tube with a magnetic stirring bar, indole derivative (0.5 mmol) and DIPEA (2.5 equiv) were dissolved in MeCN (5.0 mL). The test tube was sealed with a septum. The mixture was purged with argon for ten minutes. Then the mixture was irradiated at 30-35 °C with 365 nm or 410 nm LEDs for 10–14 h. The solvent was removed under reduced pressure. The residue was purified with flash column chromatography (PE:EA = 10:1 – 1:1) to afford the product.

**10b,11-Dihydro-6H-isoindolo[2,1-a]indol-6-one (1)**

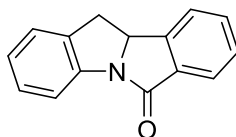

$^1\text{H}$  NMR (400 MHz,  $\text{CDCl}_3$ )  $\delta$  7.92 (d,  $J = 7.5$  Hz, 1 H), 7.71 (d,  $J = 7.8$  Hz, 1 H), 7.63 (t,  $J = 7.4$  Hz, 1 H), 7.54 (d,  $J = 7.7$  Hz, 2 H), 7.37–7.27 (m, 2 H), 7.10 (t,  $J = 7.5$  Hz, 1 H), 5.64 (dd,  $J = 10.3, 8.7$  Hz, 1 H), 3.49 (dd,  $J = 15.1, 8.7$  Hz, 1 H), 3.08 (dd,  $J = 15.2, 10.3$  Hz, 1 H);  $^{13}\text{C}$  NMR (101 MHz,  $\text{CDCl}_3$ )  $\delta$  168.41, 146.06, 140.66, 135.97, 134.24, 132.58, 128.74, 128.03, 125.37, 124.88, 124.47, 122.87, 116.52, 65.46, 33.82 ppm. HRMS (ESI) Calcd for  $[\text{C}_{15}\text{H}_{11}\text{NO}+\text{H}]^+$ : 222.0913, Found: 222.0912.

**2-Bromo-10b,11-dihydro-6H-isoindolo[2,1-a]indol-6-one (2)**

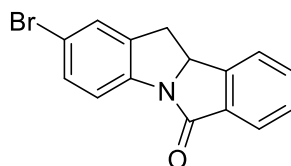

$^1\text{H}$  NMR (500 MHz,  $\text{CDCl}_3$ )  $\delta$  7.90 (d,  $J = 8.3$  Hz, 1 H), 7.64 (t,  $J = 7.5$  Hz, 1 H), 7.56 (d,  $J = 8.3$  Hz, 1 H), 7.53 (t,  $J = 7.1$  Hz, 2 H), 7.42 (d,  $J = 8.8$  Hz, 1 H), 7.38 (s, 1 H), 5.63 (dd,  $J = 10.3, 8.7$  Hz, 1 H), 3.47 (dd,  $J = 15.4, 8.7$  Hz, 1 H), 3.07 (dd,  $J = 15.4, 10.4$  Hz, 1 H);  $^{13}\text{C}$  NMR (126 MHz,  $\text{CDCl}_3$ )  $\delta$  168.38, 145.77, 139.80, 138.16, 133.82, 132.86, 130.94, 128.93, 128.52, 124.99, 122.93, 117.68, 117.22, 65.43, 33.72 ppm. HRMS (ESI) Calcd for  $[\text{C}_{15}\text{H}_{10}\text{BrNO}+\text{H}]^+$ : 300.0019, Found: 300.0014.

**2-Chloro-10b,11-dihydro-6H-isoindolo[2,1-a]indol-6-one (3)**

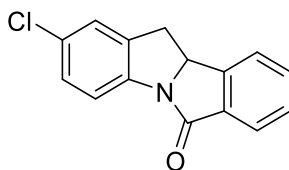

$^1\text{H}$  NMR (500 MHz,  $\text{CDCl}_3$ )  $\delta$  7.87 (d,  $J$  = 8.0 Hz, 1 H), 7.62 (t,  $J$  = 7.5 Hz, 1 H), 7.58 (d,  $J$  = 8.3 Hz, 1 H), 7.52 – 7.49 (m, 2 H), 7.24 (d,  $J$  = 8.3 Hz, 1 H), 7.20 (s, 1 H), 5.61 (dd,  $J$  = 10.3, 8.7 Hz, 1 H), 3.45 (dd,  $J$  = 15.4, 8.8 Hz, 1 H), 3.03 (dd,  $J$  = 15.4, 10.3 Hz, 1 H);  $^{13}\text{C}$  NMR (126 MHz,  $\text{CDCl}_3$ )  $\delta$  168.41, 145.82, 139.31, 137.81, 133.79, 132.84, 129.61, 128.90, 127.96, 125.66, 124.93, 122.93, 117.15, 65.49, 33.75 ppm. HRMS (ESI) Calcd for  $[\text{C}_{15}\text{H}_{10}\text{ClNO}+\text{H}]^+$ : 256.0524, Found: 256.0519.

**2-Fluoro-10b,11-dihydro-6H-isoindolo[2,1-a]indol-6-one (4)**

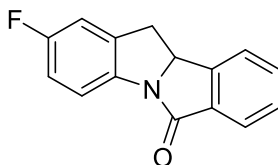

$^1\text{H}$  NMR (400 MHz,  $\text{CDCl}_3$ )  $\delta$  7.88 (d,  $J$  = 8.0 Hz, 1 H), 7.62 (d,  $J$  = 8.3 Hz, 1 H), 7.59 (d,  $J$  = 7.4 Hz, 1 H), 7.52 (s, 1 H), 7.49 (d,  $J$  = 7.0 Hz, 1 H), 6.97 (d,  $J$  = 8.4 Hz, 1 H), 6.94 (s, 1 H), 5.63 (dd,  $J$  = 10.4, 8.7 Hz, 1 H), 3.45 (dd,  $J$  = 15.5, 8.7 Hz, 1 H), 3.04 (dd,  $J$  = 15.3, 10.4 Hz, 1 H);  $^{19}\text{F}$  NMR (376 MHz,  $\text{CDCl}_3$ )  $\delta$  -118.20 - 118.26 (m);  $^{13}\text{C}$  NMR (101 MHz,  $\text{CDCl}_3$ )  $\delta$  168.53, 159.99 (d,  $J$  = 242.8 Hz), 145.88, 137.96 (d,  $J$  = 8.6 Hz), 136.80 (d,  $J$  = 2.2 Hz), 133.89, 132.71, 128.86, 124.87, 122.89, 117.05 (d,  $J$  = 8.8 Hz), 114.31 (d,  $J$  = 23.4 Hz), 112.98 (d,  $J$  = 24.3 Hz), 65.76, 33.98 (d,  $J$  = 1.9 Hz) ppm. HRMS (ESI) Calcd for  $[\text{C}_{15}\text{H}_{10}\text{FNO}+\text{H}]^+$ : 240.0819, Found: 240.0814.

**2-Methoxy-10b,11-dihydro-6H-isoindolo[2,1-a]indol-6-one (5)**

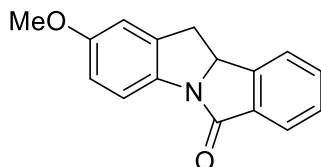

$^1\text{H}$  NMR (500 MHz,  $\text{CDCl}_3$ )  $\delta$  7.89 (d,  $J$  = 7.6 Hz, 1 H), 7.60 (t,  $J$  = 7.9 Hz, 2 H), 7.50 (t,  $J$  = 7.0 Hz, 2 H), 6.82 (d,  $J$  = 8.7 Hz, 2 H), 5.60 (dd,  $J$  = 10.3, 8.6 Hz, 1 H), 3.81 (s, 3 H), 3.43 (dd,  $J$  = 15.2, 8.6 Hz, 1 H), 3.03 (dd,  $J$  = 15.2, 10.3 Hz, 1 H);  $^{13}\text{C}$  NMR (126 MHz,  $\text{CDCl}_3$ )  $\delta$  168.37, 157.07, 145.93, 137.62, 134.30, 134.24, 132.38, 128.71, 124.74, 122.80, 116.85, 112.30, 112.13, 65.81, 55.74, 34.10 ppm. HRMS (ESI) Calcd for  $[\text{C}_{16}\text{H}_{13}\text{NO}_2+\text{H}]^+$ : 252.1019, Found: 252.1014.

**6-Oxo-10b,11-dihydro-6H-isoindolo[2,1-a]indol-2-yl acetate (6)**

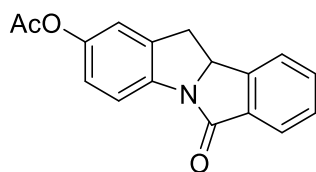

$^1\text{H}$  NMR (400 MHz,  $\text{CDCl}_3$ )  $\delta$  7.89 (d,  $J = 7.7$  Hz, 1 H), 7.67 (d,  $J = 8.6$  Hz, 1 H), 7.62 (t,  $J = 7.1$  Hz, 1 H), 7.53–7.49 (m, 2 H), 7.00 (d,  $J = 7.6$  Hz, 2 H), 5.64 (dd,  $J = 10.3, 8.7$  Hz, 1 H), 3.47 (dd,  $J = 15.4, 8.7$  Hz, 1 H), 3.07 (dd,  $J = 15.3, 10.3$  Hz, 1 H), 2.31 (s, 3 H);  $^{13}\text{C}$  NMR (101 MHz,  $\text{CDCl}_3$ )  $\delta$  169.84, 168.44, 147.36, 145.93, 138.48, 137.35, 133.94, 132.72, 128.84, 124.91, 122.89, 120.93, 119.22, 116.77, 65.72, 33.90, 21.10 ppm. HRMS (ESI) Calcd for  $[\text{C}_{17}\text{H}_{13}\text{NO}_3+\text{H}]^+$ : 280.0968, Found: 280.0964.

**N-(6-Oxo-10b,11-dihydro-6H-isoindolo[2,1-a]indol-2-yl)acetamide (7)**

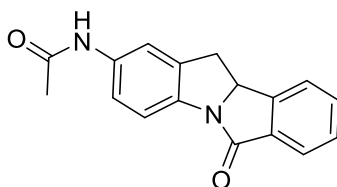

$^1\text{H}$  NMR (400 MHz,  $\text{CDCl}_3$ )  $\delta$  7.90 (d,  $J = 7.1$  Hz, 1 H), 7.77 (s, 1 H), 7.63–7.61 (m, 2 H), 7.53 (d,  $J = 7.1$  Hz, 2 H), 7.37 (s, 1 H), 7.09 (d,  $J = 7.7$  Hz, 1 H), 5.63 (dd,  $J = 10.3, 8.6$  Hz, 1 H), 3.48 (dd,  $J = 15.3, 8.6$  Hz, 1 H), 3.06 (dd,  $J = 15.3, 10.3$  Hz, 1 H), 2.20 (s, 3 H);  $^{13}\text{C}$  NMR (126 MHz,  $\text{CDCl}_3$ )  $\delta$  168.57, 168.47, 146.00, 137.02, 136.92, 134.83, 134.04, 132.65, 128.79, 124.77, 122.94, 119.47, 118.20, 116.36, 65.77, 33.95, 24.50 ppm. HRMS (ESI) Calcd for  $[\text{C}_{17}\text{H}_{14}\text{N}_2\text{O}_2+\text{H}]^+$ : 279.1128, Found: 279.1124.

**2-(Benzyloxy)-10b,11-dihydro-6H-isoindolo[2,1-a]indol-6-one (8)**

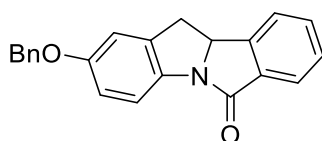

$^1\text{H}$  NMR (400 MHz,  $\text{CDCl}_3$ )  $\delta$  7.90 (d,  $J = 8.1$  Hz, 1 H), 7.65–7.56 (m, 2 H), 7.53–7.49 (m, 2 H), 7.46–7.39 (m, 4 H), 7.35 (d,  $J = 7.0$  Hz, 1 H), 6.90 (d,  $J = 7.1$  Hz, 2 H), 5.60 (dd,  $J = 10.3, 8.6$  Hz, 1 H), 5.06 (s, 2 H), 3.42 (dd,  $J = 15.3, 8.6$  Hz, 1 H), 3.03 (dd,  $J = 15.2, 10.3$  Hz, 1 H);  $^{13}\text{C}$  NMR (126 MHz,  $\text{CDCl}_3$ )  $\delta$  168.41, 156.22, 145.94, 137.66, 136.98, 134.45, 134.27, 132.42, 128.73, 128.62, 128.01, 127.46, 124.76, 122.81, 116.86, 113.51, 113.14, 70.56, 65.82, 34.08 ppm. HRMS (ESI) Calcd for  $[\text{C}_{22}\text{H}_{17}\text{NO}_2+\text{H}]^+$ : 328.1332, Found: 328.1326.

**2-(Allyloxy)-10b,11-dihydro-6H-isoindolo[2,1-a]indol-6-one (9)**

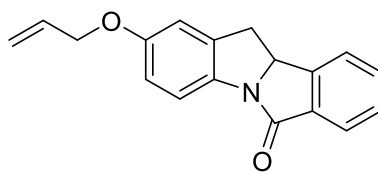

$^1\text{H}$  NMR (500 MHz,  $\text{CDCl}_3$ )  $\delta$  7.89 (d,  $J = 7.8$  Hz, 1 H), 7.61 (t,  $J = 7.1$  Hz, 1 H), 7.59 (t,  $J = 8.1$  Hz, 1 H), 7.52–7.49 (m, 2 H), 6.88–6.78 (m, 2 H), 6.06 (ddt,  $J = 17.3, 10.5, 2.2$  Hz, 1 H), 5.60 (dd,  $J = 10.2, 8.7$  Hz, 1 H), 5.42 (dd,  $J = 17.2, 1.7$  Hz, 1 H), 5.30 (dd,  $J = 10.4, 1.5$  Hz, 1 H), 4.53 (d,  $J = 2.2$  Hz, 2 H), 3.43 (dd,  $J = 15.2, 8.6$  Hz, 1 H), 3.04 (dd,  $J = 15.2, 10.3$  Hz, 1 H);  $^{13}\text{C}$  NMR (126 MHz,  $\text{CDCl}_3$ )  $\delta$  168.38, 156.03, 145.93, 137.58, 134.39, 134.29, 133.26, 132.39, 128.72, 124.76, 122.79, 117.71, 116.83, 113.37, 113.01, 69.38, 65.80, 34.09 ppm. HRMS (ESI) Calcd for  $[\text{C}_{18}\text{H}_{15}\text{NO}_2+\text{H}]^+$ : 278.1176, Found: 278.1171.

**4-Methyl-10b,11-dihydro-6H-isoindolo[2,1-a]indol-6-one (10)**

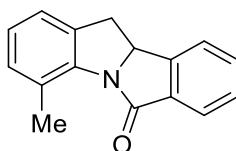

$^1\text{H}$  NMR (500 MHz,  $\text{CDCl}_3$ )  $\delta$  7.78 (d,  $J = 7.9$  Hz, 1 H), 7.51 (t,  $J = 7.4$  Hz, 1 H), 7.43 – 7.40 (m, 2 H), 7.02 (d,  $J = 7.2$  Hz, 1 H), 6.97 (d,  $J = 6.9$  Hz, 1 H), 6.92 (d,  $J = 7.4$  Hz, 1 H), 5.46 (dd,  $J = 10.4, 8.2$  Hz, 1 H), 3.25 (dd,  $J = 14.9, 8.1$  Hz, 1 H), 2.87 (dd,  $J = 14.8, 10.7$  Hz, 1 H), 2.60 (s, 3 H);  $^{13}\text{C}$  NMR (126 MHz,  $\text{CDCl}_3$ )  $\delta$  168.09, 144.68, 139.18, 136.50, 133.09, 131.34, 129.07, 127.67, 127.61, 124.26, 123.66, 121.70, 121.36, 65.86, 33.74, 18.65 ppm. HRMS (ESI) Calcd for  $[\text{C}_{16}\text{H}_{13}\text{NO}+\text{H}]^+$ : 236.1070, Found: 236.1066.

**1-Bromo-10b,11-dihydro-6H-isoindolo[2,1-a]indol-6-one (11)**

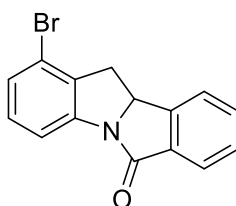

$^1\text{H}$  NMR (500 MHz,  $\text{CDCl}_3$ )  $\delta$  7.90 (d,  $J = 7.6$  Hz, 1 H), 7.66–7.60 (m, 2 H), 7.54–7.50 (m, 2 H), 7.22 (d,  $J = 8.0$  Hz, 1 H), 7.18 (d,  $J = 7.8$  Hz, 1 H), 5.64 (dd,  $J = 10.1, 9.0$  Hz, 1 H), 3.54 (dd,  $J = 15.8, 9.0$  Hz, 1 H), 3.04 (dd,  $J = 15.8, 10.1$  Hz, 1 H);  $^{13}\text{C}$  NMR (126 MHz,  $\text{CDCl}_3$ )  $\delta$  168.75, 145.95, 141.76, 136.44, 133.66, 132.96, 129.66, 128.91, 127.36, 125.00, 122.96, 119.50, 115.16, 64.45, 35.13 ppm. HRMS (ESI) Calcd for  $[\text{C}_{15}\text{H}_{10}\text{BrNO}+\text{H}]^+$ : 300.0019, Found: 300.0015.

**6-Oxo-10b,11-dihydro-6H-isoindolo[2,1-a]indole-1-carbonitrile (12)**

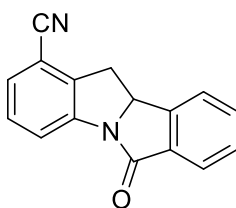

$^1\text{H}$  NMR (500 MHz,  $\text{CDCl}_3$ )  $\delta$  7.89 (d,  $J = 7.7$  Hz, 1 H), 7.86 (d,  $J = 8.1$  Hz, 1 H), 7.67 (td,  $J = 7.5, 1.1$  Hz, 1 H), 7.56 (t,  $J = 8.0$  Hz, 1 H), 7.54 (t,  $J = 7.6$  Hz, 1 H), 7.39 (t,  $J = 7.8$  Hz, 1 H), 7.33 (dd,  $J = 7.8, 1.1$  Hz, 1 H), 5.71 (dd,  $J = 10.2, 8.9$  Hz, 1 H), 3.73 (dd,  $J = 16.2, 8.9$  Hz, 1 H), 3.21 (dd,  $J = 16.2, 10.2$  Hz, 1 H);  $^{13}\text{C}$  NMR (126 MHz,  $\text{CDCl}_3$ )  $\delta$  168.76, 145.67, 141.74, 140.24, 133.36, 133.25, 129.19, 129.11, 127.29, 125.15, 123.14, 120.45, 116.80, 109.60, 64.83, 33.51 ppm. HRMS (ESI) Calcd for  $[\text{C}_{16}\text{H}_{10}\text{N}_2\text{O}+\text{H}]^+$ : 247.0866, Found: 247.0862.

**11-(Hydroxymethyl)-10b,11-dihydro-6H-isoindolo[2,1-a]indol-6-one (13)**

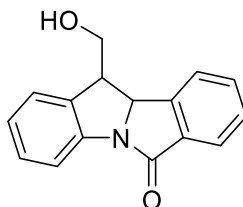

*trans* : *cis* = 4.0:1

Major (*trans*):  $^1\text{H}$  NMR (500 MHz,  $\text{CDCl}_3$ )  $\delta$  7.82 (d,  $J = 7.6$  Hz, 1 H), 7.72 (d,  $J = 7.6$  Hz, 1 H), 7.63 (d,  $J = 7.8$  Hz, 1 H), 7.53 (t,  $J = 7.5$  Hz, 1 H), 7.48 (t,  $J = 7.5$  Hz, 1 H), 7.44 (t,  $J = 7.5$  Hz, 1 H), 7.24 (t,  $J = 7.6$  Hz, 1 H), 7.14 (d,  $J = 7.4$  Hz, 1 H), 7.04 (t,  $J = 7.5$  Hz, 1 H), 5.42 (d,  $J = 9.2$  Hz, 1 H), 4.37 (dd,  $J = 10.7, 4.6$  Hz, 1 H), 4.06 (dd,  $J = 10.7, 8.5$  Hz, 1 H), 3.47 (td,  $J = 8.9, 4.6$  Hz, 1 H);  $^{13}\text{C}$  NMR (126 MHz,  $\text{CDCl}_3$ )  $\delta$  168.91, 145.99, 140.63, 136.33, 133.69, 132.75, 128.69, 128.44, 124.64, 124.47, 124.30, 124.15, 116.50, 70.39, 63.59, 48.46 ppm.

Minor (*cis*):  $^1\text{H}$  NMR (500 MHz,  $\text{CDCl}_3$ )  $\delta$  7.85 (d,  $J = 7.6$  Hz, 1 H), 7.69 (d,  $J = 7.8$  Hz, 1 H), 7.59 (d,  $J = 6.7$  Hz, 2 H), 7.34 (d,  $J = 7.4$  Hz, 1 H), 7.29 (d,  $J = 8.5$  Hz, 1 H), 7.10 (t,  $J = 7.5$  Hz, 1 H), 5.58 (d,  $J = 8.1$  Hz, 1 H), 3.69 (dt,  $J = 8.1, 6.1$  Hz, 1 H), 3.55 (br, 1 H), 3.45 – 3.40 (m, 1 H), 3.21 (dd,  $J = 11.2, 6.1$  Hz, 1 H), 2.44 (s, 1 H);  $^{13}\text{C}$  NMR (126 MHz,  $\text{CDCl}_3$ )  $\delta$  168.28, 142.66, 139.88, 136.84, 134.86, 132.29, 128.83, 128.78, 126.06, 124.71, 124.68, 124.21, 116.38, 67.60, 62.97, 45.34 ppm. HRMS (ESI) Calcd for  $[\text{C}_{16}\text{H}_{13}\text{NO}_2+\text{H}]^+$ : 252.1019, Found: 252.1015.

**Methyl 2-(6-oxo-10b,11-dihydro-6H-isoindolo[2,1-a]indol-11-yl)acetate (14)**

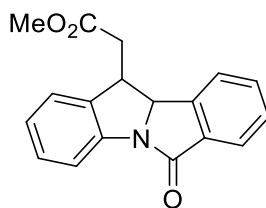

*trans* : *cis* = 12.8 : 1

$^1\text{H}$  NMR (500 MHz,  $\text{CDCl}_3$ )  $\delta$  7.87 (d,  $J = 7.6$  Hz, 1 H), 7.67 (d,  $J = 7.8$  Hz, 1 H), 7.59 (t,  $J = 7.4$  Hz, 1 H), 7.55 (d,  $J = 7.5$  Hz, 1 H), 7.49 (t,  $J = 7.4$  Hz, 1 H), 7.29 (t,  $J = 7.6$  Hz, 1 H), 7.16 (d,  $J = 7.5$  Hz, 1 H), 7.08 (t,  $J = 7.5$  Hz, 1 H), 5.31 (d,  $J = 9.3$  Hz, 1 H), 3.81 (s, 3 H), 3.76 (dd,  $J = 7.7, 5.6$  Hz, 1 H), 3.12 (dd,  $J = 15.9, 5.6$  Hz, 1 H), 2.96 (dd,  $J = 15.9, 7.7$  Hz, 1 H);  $^{13}\text{C}$  NMR (126 MHz,  $\text{CDCl}_3$ )  $\delta$  172.15, 168.42, 145.08, 140.27, 138.09, 133.85, 132.74, 128.98, 128.52, 124.79, 124.66, 124.01, 123.26, 116.49, 71.03, 52.15, 42.73, 37.76 ppm. HRMS (ESI) Calcd for  $[\text{C}_{18}\text{H}_{15}\text{NO}_3 + \text{H}]^+$ : 294.1125, Found: 294.1119.

***tert*-Butyl (2-(6-oxo-10b,11-dihydro-6H-isoindolo[2,1-a]indol-11-yl)ethyl)carbamate (15)**

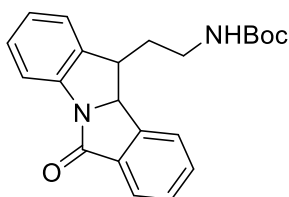

*trans* : *cis* = 3.3 : 1

Major (*trans*):

$^1\text{H}$  NMR (500 MHz,  $\text{CDCl}_3$ )  $\delta$  7.76 (d,  $J = 7.5$  Hz, 1 H), 7.54 (d,  $J = 7.6$  Hz, 1 H), 7.52 – 7.49 (m, 2 H), 7.39 (t,  $J = 7.2$  Hz, 1 H), 7.12 (t,  $J = 7.5$  Hz, 1 H), 7.06 (d,  $J = 7.4$  Hz, 1 H), 6.89 (t,  $J = 7.3$  Hz, 1 H), 5.12 (d,  $J = 9.4$  Hz, 1 H), 5.05 (d,  $J = 6.0$  Hz, 1 H), 3.47 – 3.41 (m, 2 H), 3.17 (dt,  $J = 13.9, 6.6$  Hz, 1 H), 2.29 – 2.22 (m, 1 H), 2.19 – 1.99 (m, 1 H), 1.38 (s, 9 H);  $^{13}\text{C}$  NMR (126 MHz,  $\text{CDCl}_3$ )  $\delta$  168.35, 156.06, 145.30, 140.20, 139.27, 134.00, 132.79, 128.88, 128.10, 124.87, 124.65, 124.13, 123.04, 116.40, 79.53, 71.09, 43.69, 39.11, 28.48, 28.42 ppm.

Minor (*cis*):

$^1\text{H}$  NMR (500 MHz,  $\text{CDCl}_3$ )  $\delta$  7.80 (d,  $J = 7.6$  Hz, 1 H), 7.61 (d,  $J = 7.7$  Hz, 1 H), 7.52 – 7.49 (m, 2 H), 7.41 (t,  $J = 7.6$  Hz, 1 H), 7.27 (d,  $J = 7.8$  Hz, 1 H), 7.21 (t,  $J = 7.7$  Hz, 1 H), 7.00 (t,  $J = 7.2$  Hz, 1 H), 5.44 (d,  $J = 7.7$  Hz, 1 H), 4.50 (t,  $J = 6.0$  Hz, 1 H), 3.07 (q,  $J = 7.2$  Hz, 1 H), 2.88 (ddd,  $J = 14.6, 10.6, 5.2$  Hz, 1 H), 2.19 – 1.99 (m, 2 H), 1.32 (s, 9 H);  $^{13}\text{C}$  NMR (126 MHz,  $\text{CDCl}_3$ )  $\delta$  167.29, 155.99, 142.46, 139.06, 138.94, 135.28, 132.26, 128.50, 126.17, 124.77, 124.45, 116.70, 79.33, 69.04, 41.71, 40.49, 37.38, 32.09, 28.42 ppm

HRMS (ESI) Calcd for  $[\text{C}_{22}\text{H}_{24}\text{N}_2\text{O}_3 + \text{H}]^+$ : 365.1869, Found: 365.1853.

**Methyl (2S)-2-((tert-butoxycarbonyl)amino)-3-(6-oxo-10b,11-dihydro-6H-isoindolo[2,1-a]indol-11-yl)propanoate (16)**

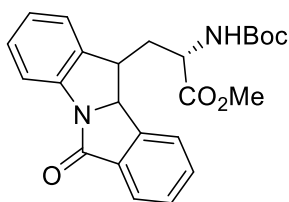

*trans* : *cis* = 1.4 : 1

$^1\text{H}$  NMR (500 MHz,  $\text{CDCl}_3$ )  $\delta$  7.86 (dd,  $J = 7.5, 3.0$  Hz, 0.5 H), 7.81 (d,  $J = 7.6$  Hz, 1 H), 7.69 (t,  $J = 8.2$  Hz, 0.5 H), 7.64 – 7.56 (m, 4.66 H), 7.55 – 7.47 (m, 3 H), 7.43 (p,  $J = 6.2$  Hz, 3 H), 7.30 (t,  $J = 8.6$  Hz, 0.5 H), 7.24 (t,  $J = 7.7$  Hz, 0.5 H), 7.19 (t,  $J = 6.1$  Hz, 2 H), 7.13 (t,  $J = 7.5$  Hz, 1.5 H), 7.07 (d,  $J = 7.4$  Hz, 1 H), 6.97 – 6.90 (m, 2 H), 6.01 (d,  $J = 8.6$  Hz, 0.5 H), 5.83 (d,  $J = 8.6$  Hz, 1 H), 5.52 (dd,  $J = 7.8, 5.6$  Hz, 0.5 H), 5.26 (dd,  $J = 10.0, 6.6$  Hz, 2 H), 4.69 (td,  $J = 8.6, 5.8$  Hz, 1 H), 4.63 – 4.54 (m, 1 H), 4.32 (t,  $J = 7.4$  Hz, 0.5 H), 3.72 (s, 3 H), 3.70 (s, 3 H), 3.64 – 3.54 (m, 0.5 H), 3.50 – 3.38 (m, 1.5 H), 3.38 – 3.30 (m, 1 H), 2.58 (dt,  $J = 12.7, 6.4$  Hz, 1.5 H), 2.51 (ddd,  $J = 14.9, 11.0, 4.1$  Hz, 1.5 H), 2.40 – 2.31 (m, 2 H), 1.41 (s, 6 H), 1.37 (s, 12 H) ppm.  $^{13}\text{C}$  NMR (126 MHz,  $\text{CDCl}_3$ )  $\delta$  173.19, 172.83, 168.59, 168.31, 155.94, 155.59, 145.23, 145.05, 140.12, 140.08, 139.13, 138.68, 133.85, 133.70, 132.88, 132.68, 128.82, 128.17, 128.07, 124.75, 124.68, 124.56, 124.36, 124.05, 123.48, 123.10, 116.30, 80.18, 80.15, 71.36, 71.01, 68.89, 60.40, 52.60, 52.52, 43.06, 42.72, 36.05, 35.39, 28.32, 28.27, 28.25, 21.01, 14.17 ppm HRMS (ESI) Calcd for  $[\text{C}_{24}\text{H}_{26}\text{N}_2\text{O}_5+\text{H}]^+$ : 423.1914, Found: 423.1907.  $[\alpha]_D^{25} = +24.9$  (c 1.0,  $\text{CHCl}_3$ ).

**11-Methyl-10b,11-dihydro-6H-isoindolo[2,1-a]indol-6-one (17)**

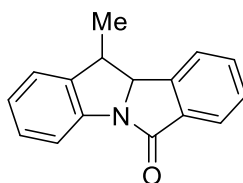

*trans* : *cis* = 5.9 : 1

$^1\text{H}$  NMR (500 MHz,  $\text{CDCl}_3$ )  $\delta$  7.78 (d,  $J = 7.7$  Hz, 1 H), 7.56 (d,  $J = 7.7$  Hz, 1 H), 7.50 (t,  $J = 7.2$  Hz, 1 H), 7.44 (d,  $J = 7.5$  Hz, 1 H), 7.40 (t,  $J = 7.3$  Hz, 1 H), 7.19 (t,  $J = 7.9$  Hz, 1 H), 7.09 (d,  $J = 7.4$  Hz, 1 H), 7.01 (t,  $J = 7.5$  Hz, 1 H), 5.01 (d,  $J = 9.8$  Hz, 1 H), 3.27–3.13 (m, 1 H), 1.60 (d,  $J = 6.8$  Hz, 3 H);  $^{13}\text{C}$  NMR (126 MHz,  $\text{CDCl}_3$ )  $\delta$  166.85, 144.31, 139.96, 139.08, 133.10, 131.45, 127.79, 126.98, 123.85, 123.56, 122.58, 121.32, 115.43, 71.93, 40.29, 15.70 ppm. HRMS (ESI) Calcd for  $[\text{C}_{16}\text{H}_{13}\text{NO}+\text{H}]^+$ : 236.1070, Found: 236.1066.

**10b-Methyl-10b,11-dihydro-6H-isoindolo[2,1-a]indol-6-one (18)**

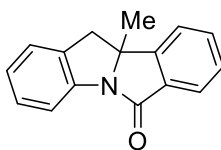

$^1\text{H}$  NMR (400 MHz,  $\text{CDCl}_3$ )  $\delta$  7.89 (d,  $J = 8.1$  Hz, 1 H), 7.70 (d,  $J = 7.8$  Hz, 1 H), 7.62 (t,  $J = 8.0$  Hz, 1 H), 7.55–7.44 (m, 2 H), 7.32 (t,  $J = 7.7$  Hz, 1 H), 7.25 (d,  $J = 7.4$  Hz, 1 H), 7.10 (t,  $J = 7.5$  Hz, 1 H), 3.19 (d,  $J = 15.2$  Hz, 1 H), 3.12 (d,  $J = 15.1$  Hz, 1 H), 1.66 (s, 3 H);  $^{13}\text{C}$  NMR (126 MHz,  $\text{CDCl}_3$ )  $\delta$  168.24, 151.31, 139.52, 135.82, 132.86, 132.65, 128.62, 128.01, 125.70, 124.97, 124.57, 121.95, 117.27, 71.94, 40.38, 27.21 ppm. HRMS (ESI) Calcd for  $[\text{C}_{16}\text{H}_{13}\text{NO}+\text{H}]^+$ : 236.1070, Found: 236.1066.

**1-Bromo-11-(hydroxymethyl)-10b,11-dihydro-6H-isoindolo[2,1-a]indol-6-one (19)**

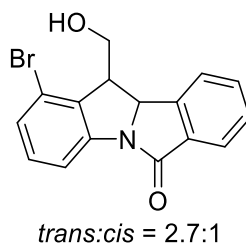

Major (*trans*):

$^1\text{H}$  NMR (500 MHz,  $\text{CDCl}_3$ )  $\delta$  7.87 (d,  $J = 7.6$  Hz, 1 H), 7.74 (d,  $J = 7.5$  Hz, 1 H), 7.69 (d,  $J = 7.8$  Hz, 1 H), 7.66 (d,  $J = 8.0$  Hz, 1 H), 7.58 (t,  $J = 8.0$  Hz, 1 H), 7.49 (t,  $J = 7.5$  Hz, 1 H), 7.18 (d,  $J = 7.5$  Hz, 1 H), 7.08 (t,  $J = 7.1$  Hz, 1 H), 5.48 (d,  $J = 9.2$  Hz, 1 H), 4.42 (dd,  $J = 10.6, 4.5$  Hz, 1 H), 4.22 – 3.95 (m, 1 H), 3.59 – 3.52 (m, 1 H);  $^{13}\text{C}$  NMR (126 MHz,  $\text{CDCl}_3$ )  $\delta$  168.80, 145.94, 140.91, 136.03, 133.83, 132.71, 128.71, 128.58, 124.59, 124.57, 124.17, 124.03, 116.65, 70.21, 63.75, 48.53 ppm.

Minor (*cis*):

$^1\text{H}$  NMR (500 MHz,  $\text{CDCl}_3$ )  $\delta$  7.92 (d,  $J = 7.6$  Hz, 1 H), 7.54 (t,  $J = 7.3$  Hz, 1 H), 7.27 (s, 1 H), 7.24 (d,  $J = 7.7$  Hz, 1 H), 5.63 (d,  $J = 8.0$  Hz, 1 H), 3.80 (ddd,  $J = 8.3, 5.8, 2.8$  Hz, 1 H), 3.66 (dd,  $J = 11.5, 2.9$  Hz, 1 H), 3.60 (d,  $J = 5.7$  Hz, 1 H);  $^{13}\text{C}$  NMR (126 MHz,  $\text{CDCl}_3$ )  $\delta$  168.18, 142.61, 141.75, 135.57, 134.93, 132.44, 130.51, 128.97, 127.93, 124.89, 124.36, 119.68, 115.36, 67.25, 60.56, 47.00 ppm. HRMS (ESI) Calcd for  $[\text{C}_{16}\text{H}_{12}\text{BrNO}_2+\text{H}]^+$ : 330.0124, Found: 330.0121.



**7-Fluoro-10b,11-dihydro-6H-isoindolo[2,1-a]indol-6-one (20)**

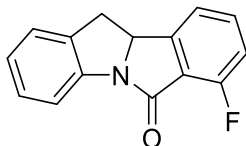

$^1\text{H}$  NMR (400 MHz,  $\text{CDCl}_3$ )  $\delta$  7.65 (d,  $J = 7.8$  Hz, 1 H), 7.60–7.55 (m, 1 H), 7.30 (d,  $J = 7.5$  Hz, 1 H), 7.23 (d,  $J = 7.6$  Hz, 2 H), 7.11 (t,  $J = 8.8$  Hz, 1 H), 7.07 (t,  $J = 7.4$  Hz, 1 H), 5.58 (dd,  $J = 10.3, 8.8$  Hz, 1 H), 3.46 (dd,  $J = 15.2, 8.8$  Hz, 1 H), 3.05 (dd,  $J = 15.1, 10.3$  Hz, 1 H);  $^{19}\text{F}$  NMR (376 MHz,  $\text{CDCl}_3$ )  $\delta$  -116.18 (dd,  $J = 9.0, 4.7$  Hz);  $^{13}\text{C}$  NMR (126 MHz,  $\text{CDCl}_3$ )  $\delta$  165.24 (d,  $J = 2.3$  Hz), 159.36 (d,  $J = 261.9$  Hz), 148.68 (d,  $J = 2.7$  Hz), 140.43, 135.68 (d,  $J = 2.0$  Hz), 134.81 (d,  $J = 7.7$  Hz), 128.00 (d,  $J = 2.2$  Hz), 125.40, 124.67, 121.23 (d,  $J = 12.2$  Hz), 119.00 (d,  $J = 3.8$  Hz), 116.56 (d,  $J = 2.5$  Hz), 116.04 (d,  $J = 19.3$  Hz), 65.09, 33.79 ppm. HRMS (ESI) Calcd for  $[\text{C}_{15}\text{H}_{10}\text{FNO}+\text{H}]^+$ : 240.0819, Found: 240.0814.

**9-Chloro-10b,11-dihydro-6H-isoindolo[2,1-a]indol-6-one (21)**

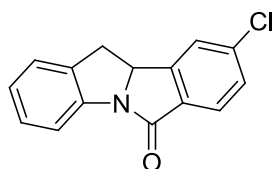

$^1\text{H}$  NMR (500 MHz,  $\text{CDCl}_3$ )  $\delta$  7.84 (d,  $J = 8.1$  Hz, 1 H), 7.69 (d,  $J = 7.8$  Hz, 1 H), 7.54 (s, 1 H), 7.51 (d,  $J = 8.1$  Hz, 1 H), 7.32 (t,  $J = 7.6$  Hz, 1 H), 7.27 (d,  $J = 10.4$  Hz, 1 H), 7.11 (t,  $J = 7.4$  Hz, 1 H), 5.61 (dd,  $J = 10.4, 8.7$  Hz, 1 H), 3.47 (dd,  $J = 15.1, 8.7$  Hz, 1 H), 3.09 (dd,  $J = 15.0, 10.4$  Hz, 1 H);  $^{13}\text{C}$  NMR (101 MHz,  $\text{CDCl}_3$ )  $\delta$  167.28, 147.48, 140.39, 139.00, 135.57, 132.71, 129.38, 128.14, 126.04, 125.44, 124.71, 123.42, 116.50, 64.99, 33.64 ppm. HRMS (ESI) Calcd for  $[\text{C}_{15}\text{H}_{10}\text{ClNO}+\text{H}]^+$ : 256.0524, Found: 256.0519.

**N-(6-Oxo-10b,11-dihydro-6H-isoindolo[2,1-a]indol-9-yl)acetamide (22)**

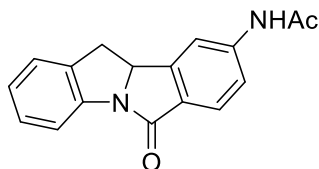

$^1\text{H}$  NMR (400 MHz,  $\text{DMSO}-d_6$ )  $\delta$  10.40 (s, 1 H), 8.07 (s, 1 H), 7.70 (d,  $J = 8.3$  Hz, 1 H), 7.59 (d,  $J = 8.4$  Hz, 1 H), 7.46 (d,  $J = 7.8$  Hz, 1 H), 7.31 (d,  $J = 7.4$  Hz, 1 H), 7.26 (t,  $J = 7.7$  Hz, 1 H), 7.08 (t,  $J = 7.5$  Hz, 1 H), 5.70 (dd,  $J = 10.1, 8.9$  Hz, 1 H), 3.55 (dd,  $J = 15.5, 8.9$  Hz, 1 H), 2.96 (dd,  $J = 15.5, 10.1$  Hz, 1 H), 2.12 (s, 3 H);  $^{13}\text{C}$  NMR (101 MHz,  $\text{DMSO}-d_6$ )  $\delta$  169.54, 168.29, 148.52, 144.12, 140.98, 136.87, 127.93, 127.69, 126.15, 125.32, 124.67, 119.63, 116.14, 113.38, 65.27, 33.72, 24.67 ppm. HRMS (ESI) Calcd for  $[\text{C}_{17}\text{H}_{14}\text{N}_2\text{O}_2+\text{H}]^+$ : 279.1128, Found: 279.1122.

**9-Methoxy-10b,11-dihydro-6H-isoindolo[2,1-a]indol-6-one (23)**

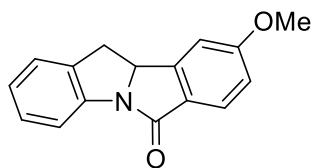

$^1\text{H}$  NMR (400 MHz,  $\text{CDCl}_3$ )  $\delta$  7.82 (d,  $J = 8.4$  Hz, 1 H), 7.68 (d,  $J = 7.8$  Hz, 1 H), 7.31 (d,  $J = 7.8$  Hz, 1 H), 7.25 (d,  $J = 7.4$  Hz, 1 H), 7.08 (td,  $J = 7.5, 1.1$  Hz, 1 H), 7.03 (dd,  $J = 8.4, 2.2$  Hz, 1 H), 7.00 (d,  $J = 2.3$  Hz, 1 H), 5.58 (dd,  $J = 10.3, 8.8$  Hz, 1 H), 3.93 (s, 3 H), 3.46 (dd,  $J = 15.2, 8.8$  Hz, 1 H), 3.09 (dd,  $J = 15.1, 10.3$  Hz, 1 H);  $^{13}\text{C}$  NMR (126 MHz,  $\text{CDCl}_3$ )  $\delta$  168.65, 163.70, 148.63, 141.03, 135.58, 128.01, 126.47, 126.34, 125.28, 124.22, 116.43, 115.17, 107.80, 65.03, 55.76, 33.85 ppm. HRMS (ESI) Calcd for  $[\text{C}_{16}\text{H}_{13}\text{NO}_2+\text{H}]^+$ : 252.1019, Found: 252.1015.

**9-Fluoro-10b,11-dihydro-6H-isoindolo[2,1-a]indol-6-one (24)**

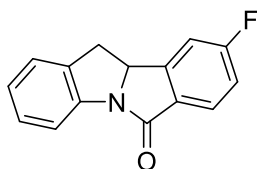

$^1\text{H}$  NMR (400 MHz,  $\text{CDCl}_3$ )  $\delta$  7.94–7.84 (m, 1 H), 7.68 (d,  $J = 7.8$  Hz, 1 H), 7.32 (d,  $J = 7.7$  Hz, 1 H), 7.26 (d,  $J = 7.4$  Hz, 1 H), 7.21 (t,  $J = 8.0$  Hz, 2 H), 7.09 (td,  $J = 7.5, 1.1$  Hz, 1 H), 5.59 (dd,  $J = 10.3, 8.8$  Hz, 1 H), 3.47 (dd,  $J = 15.1, 8.8$  Hz, 1 H), 3.08 (dd,  $J = 15.1, 10.3$  Hz, 1 H);  $^{19}\text{F}$  NMR-decoupling (376 MHz,  $\text{CDCl}_3$ )  $\delta$  -105.56;  $^{13}\text{C}$  NMR (126 MHz,  $\text{CDCl}_3$ )  $\delta$  166.41, 164.73 (d,  $J = 253.2$  Hz), 147.45 (d,  $J = 9.8$  Hz), 139.49, 134.47, 129.12 (d,  $J = 2.3$  Hz), 127.06, 125.90 (d,  $J = 10.0$  Hz), 124.36, 123.55, 115.50 (d,  $J = 23.5$  Hz), 115.39, 109.35 (d,  $J = 24.0$  Hz), 63.91 (d,  $J = 2.7$  Hz), 32.60 ppm. HRMS (ESI) Calcd for  $[\text{C}_{15}\text{H}_{10}\text{FNO}+\text{H}]^+$ : 240.0819, Found: 240.0816.

**8-(Trifluoromethyl)-10b,11-dihydro-6H-isoindolo[2,1-a]indol-6-one (25)**

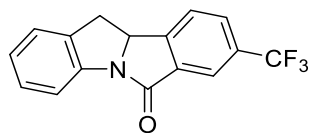

$^1\text{H}$  NMR (400 MHz,  $\text{CDCl}_3$ )  $\delta$  8.18 (s, 1 H), 7.89 (d,  $J = 7.9$  Hz, 1 H), 7.71 (d,  $J = 8.0$  Hz, 1 H), 7.68 (d,  $J = 8.0$  Hz, 1 H), 7.33 (t,  $J = 7.7$  Hz, 1 H), 7.28 (d,  $J = 7.4$  Hz, 1 H), 7.12 (td,  $J = 7.5, 1.1$  Hz, 1 H), 5.68 (dd,  $J = 10.4, 8.7$  Hz, 1 H), 3.53 (dd,  $J = 15.2, 8.7$  Hz, 1 H), 3.10 (dd,  $J = 15.1, 10.4$  Hz, 1 H);  $^{19}\text{F}$  NMR decoupling (376 MHz,  $\text{CDCl}_3$ )  $\delta$  -62.38;  $^{13}\text{C}$  NMR (126 MHz,  $\text{CDCl}_3$ )  $\delta$  165.64, 148.04, 139.11, 134.52, 134.12, 130.57 (q,  $J = 33.0$  Hz), 128.34 (q,  $J = 3.5$

Hz), 127.18, 124.46, 123.89, 122.64 (q,  $J = 272.6$  Hz), 122.56, 121.07 (q,  $J = 4.0$  Hz), 115.54, 64.40, 32.52 ppm. HRMS (ESI) Calcd for  $[C_{16}H_9F_3NO+H]^+$ : 290.0787, Found: 290.0783.

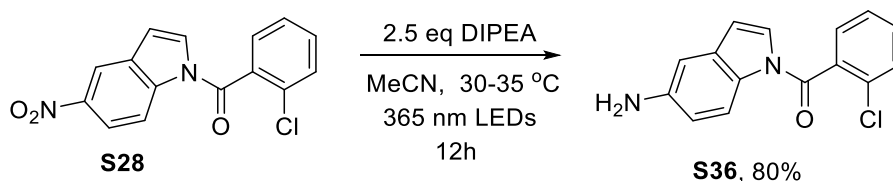

In a 10 mL test tube with a magnetic stirring bar, indole derivative (0.2 mmol) and DIPEA (80  $\mu\text{L}$ , 2.5 equiv) were dissolved in MeCN (2.0 mL). The test tube was sealed with a septum. The mixture was purged with argon for ten minutes, then the mixture was irradiated at 30-35  $^\circ\text{C}$  with 365 nm LEDs for 12 h. The solvent was removed under reduced pressure. The residue was purified by flash column chromatography (PE:EA = 2:1) to give the product (80%).

#### (5-Amino-1H-indol-1-yl)(2-chlorophenyl)methanone (S36)

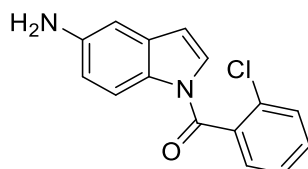

$^1\text{H}$  NMR (400 MHz,  $\text{CDCl}_3$ )  $\delta$  8.30 (br, 1 H), 7.51 (t,  $J = 7.2$  Hz, 3 H), 7.45 – 7.38 (m, 1 H), 6.86 (d,  $J = 1.8$  Hz, 2 H), 6.78 (d,  $J = 7.9$  Hz, 1 H), 6.45 (d,  $J = 3.5$  Hz, 1 H), 3.50 (br, 2 H);  $^{13}\text{C}$  NMR (101 MHz,  $\text{CDCl}_3$ )  $\delta$  165.43, 143.57, 134.96, 132.32, 131.52, 131.26, 130.06, 129.26, 128.87, 127.15, 127.08, 117.23, 114.10, 109.50, 105.97 ppm. HRMS (ESI) Calcd for  $[C_{15}H_{11}ClN_2O+H]^+$ : 271.0633, Found: 271.0630.

## Modification of complex molecules

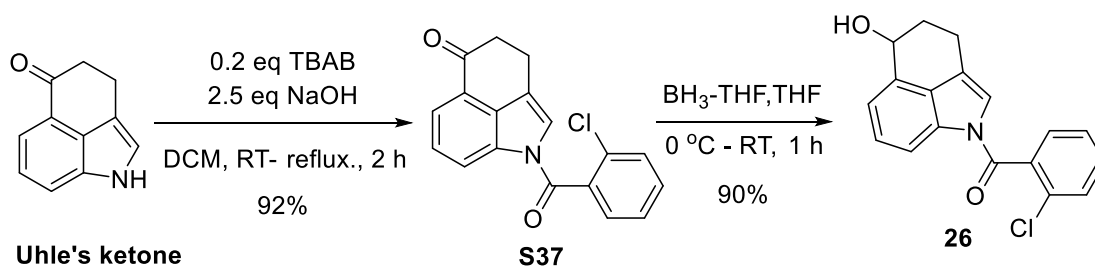

### Scheme S4: Synthesis of compound 26

A  $\text{CH}_2\text{Cl}_2$  solution of 2-chlorobenzoyl chloride (1.5 equiv) was added dropwise to a solution of the Uhle's ketone (1 equiv), which was synthesized accord to the reported peocedure<sup>[11]</sup>, NaOH (2.5 equiv) and tetrabutylammonium bromide (TBAB, 0.2 equiv) in  $\text{CH}_2\text{Cl}_2$  (15 mL) at 0 °C. The mixture was stirred at 0 °C for 0.5 h. Then the mixture was warmed to room temperature. Another 0.5 equivalent of 2-chlorobenzoyl chloride was added. The mixture was heated to reflux for 1 h. Water was added to quench the reaction and extracted with  $\text{CH}_2\text{Cl}_2$  (3  $\times$  20 mL). The combined organic layer was washed with brine, dried over  $\text{Na}_2\text{SO}_4$ . The solvent was removed under reduced pressure. The residue was purified by flash column chromatography (PE:EA = 10:1) to afford the product in 92% yield.

In a 50 mL Schlenk tube charged with a magnetic stirring bar, indole 1-(2-chlorobenzoyl)-3,4-dihydrobenzo[cd]indol-5(1H)-one (190 mg) was dissolved in THF (10 mL). The mixture was cooled to 0 °C with ice-bath,  $\text{BH}_3\cdot\text{THF}$  (1 M, 2 mL) was added dropwise. After 0.5 h, TLC indicated the substrate was consumed completely. The mixture was quenched with MeOH. The solvent was removed under reduced pressure. The residue was purified with flash column chromatography (PE:EA = 2:1) to afford the product respectively in 90% yield.

### 1-(2-Chlorobenzoyl)-3,4-dihydrobenzo[cd]indol-5(1H)-one (S37)

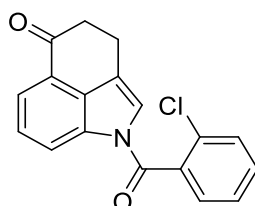

$^1\text{H}$  NMR (500 MHz,  $\text{CDCl}_3$ )  $\delta$  8.61 (br, 1 H), 7.81 (d,  $J = 7.4$  Hz, 1 H), 7.65–7.53 (m, 3 H), 7.52–7.44 (m, 2 H), 6.82 (br, 1 H), 3.19 (t,  $J = 7.5$  Hz, 2 H), 2.90 (t,  $J = 7.5$  Hz, 2 H);  $^{13}\text{C}$  NMR (126 MHz,  $\text{CDCl}_3$ )  $\delta$  196.90, 165.95, 135.40, 134.52, 134.20, 131.94, 131.22, 130.25, 128.82, 127.29, 126.27, 121.90, 120.24, 117.54, 38.31, 20.41 ppm. HRMS (ESI) Calcd for  $[\text{C}_{18}\text{H}_{12}\text{ClNO}_2+\text{H}]^+$ : 310.0629, Found: 310.0627.

### (2-Chlorophenyl)(5-hydroxy-4,5-dihydrobenzo[cd]indol-1(3H)-yl)methanone (26)

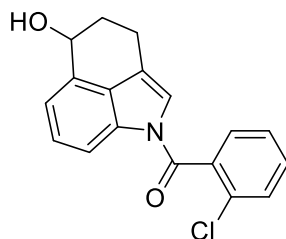

$^1\text{H}$  NMR (400 MHz,  $\text{CDCl}_3$ )  $\delta$  8.35 (br, 1 H), 7.59–7.47 (m, 3 H), 7.48–7.31 (m, 3 H), 6.62 (br, 1 H), 5.09 (d,  $J = 5.1$  Hz, 1 H), 2.94 (dt,  $J = 14.3, 6.4$  Hz, 1 H), 2.83–2.71 (m, 1 H), 2.14 (m, 2 H);  $^{13}\text{C}$  NMR (101 MHz,  $\text{CDCl}_3$ )  $\delta$  165.91, 135.03, 133.84, 133.63, 131.59, 131.18, 130.12, 129.54, 129.33, 128.80, 127.15, 126.16, 120.51, 119.75, 116.15, 67.16, 32.65, 18.04 ppm. HRMS (ESI) Calcd for  $[\text{C}_{18}\text{H}_{14}\text{ClNO}_2+\text{H}]^+$ : 312.0786, Found: 312.0790.

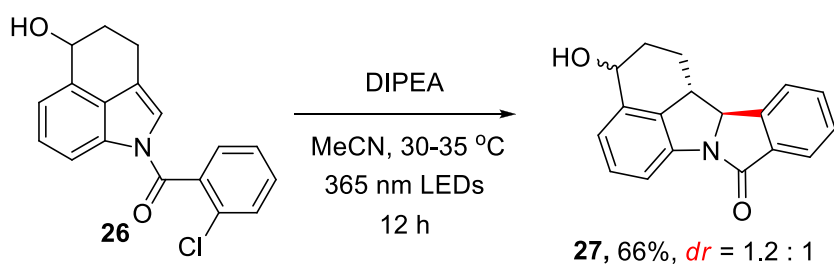

In a 10 mL test tube with a magnetic stirring bar, indole derivative (0.5 mmol) and DIPEA (0.2 mL, 2.5 eq) were dissolved in MeCN (5.0 mL). The test tube was sealed with a septum. The mixture was purged with argon for ten minutes. Then the mixture was irradiated at 30–35 °C with 365 nm LEDs for 12 h. The solvent was removed under reduced pressure. The residue was purified with flash column chromatography (PE:EA = 3:1,  $\text{CH}_2\text{Cl}_2$ :MeOH = 15:1) to afford the product in 66% yield.

### 3-Hydroxy-2,3,12b,12c-tetrahydrobenzo[cd]isoindolo[2,1-a]indol-8(1H)-one (27)

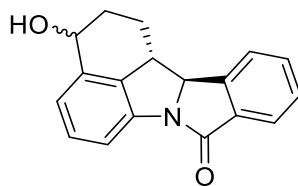

$dr = 1.2 : 1$

$^1\text{H}$  NMR (400 MHz,  $\text{CDCl}_3$ )  $\delta$  7.87 (d,  $J = 7.5$  Hz, 1 H), 7.61 (t,  $J = 7.4$  Hz, 1 H), 7.56–7.47 (m, 2 H), 7.44 (d,  $J = 7.3$  Hz, 1 H), 7.32 (d,  $J = 7.4$  Hz, 0.6 H), 7.23 (t,  $J = 7.7$  Hz, 0.7 H), 7.11 (d,  $J = 7.7$  Hz, 0.7 H), 7.08 (d,  $J = 7.7$  Hz, 0.55 H), 7.03 (d,  $J = 7.6$  Hz, 0.55 H), 5.20 (d,  $J = 10.2$  Hz, 0.55 H), 5.11 (d,  $J = 10.2$  Hz, 0.5 H), 4.90–4.75 (m, 1 H), 2.98–2.89 (m, 1 H), 2.65–2.36 (m, 1 H), 2.32–2.23 (m, 1.86 H), 2.09–1.66 (m, 3 H);  $^{13}\text{C}$  NMR (101 MHz,  $\text{CDCl}_3$ )  $\delta$  167.04, 144.59, 138.23, 137.86, 137.77, 137.56, 136.52, 132.49, 128.99, 128.92, 128.85, 128.46, 125.09, 124.97, 124.07, 122.69, 122.60, 122.56, 115.86, 114.94, 73.61, 73.23, 68.05, 64.29, 43.87,

43.66, 33.87, 32.45, 26.83, 21.59 ppm. HRMS (ESI) Calcd for  $[C_{28}H_{15}NO_2+H]^+$ : 278.1176, Found: 278.1175.

### Scheme S5: Synthesis of compound 28

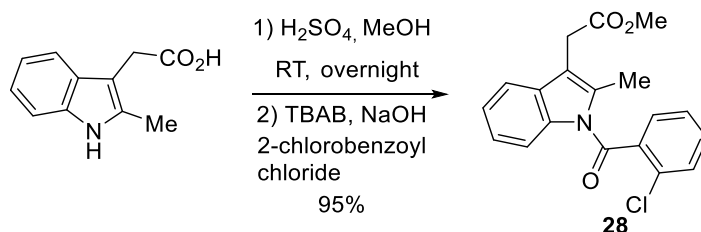

In a 100 mL round-bottom flask charged with a magnetic stirring bar, 2-(2-methyl-1H-indol-3-yl)acetic acid (1.89 g, 10 mmol) was dissolved in MeOH (50 mL). Then a few drops of concentrated  $H_2SO_4$  was added. The mixture was stirred at room temperature overnight. The reaction was quenched with water, extracted with ethyl acetate (20 mL  $\times$  3), washed with brine and dried with anhydrous sodium sulfate. The solvent was removed under reduced pressure. The residue was subjected to next step without purification.

A  $CH_2Cl_2$  solution of 2-chlorobenzoyl chloride (1.5 equiv) was added dropwise to a solution of the above indole derivative (1 equiv), NaOH (2.5 equiv) and tetrabutylammonium bromide (TBAB, 0.2 equiv) in  $CH_2Cl_2$  (15 mL) at 0 °C. The mixture was stirred at 0 °C for 0.5 h. Then the mixture was warmed to room temperature. And another 0.5 equivalent of 2-chlorobenzoyl chloride was added. The mixture was stirred at room temperature for 2.5 h. Water was added to quench the reaction, and extracted with  $CH_2Cl_2$  (3 times). The combined organic layer was washed with brine, dried over  $Na_2SO_4$ . The solvent was removed under reduced pressure. The residue was purified by flash column chromatography (PE:EA = 10:1, 4:1) to afford the product in 95% overall yield.

### Methyl 2-(2-methyl-1H-indol-3-yl)acetate<sup>16</sup>

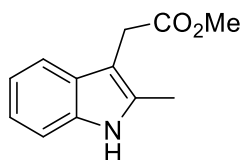

$^1H$  NMR (400 MHz,  $CDCl_3$ )  $\delta$  7.89 (s, 1 H), 7.56 (dd,  $J$  = 6.2, 2.5 Hz, 1 H), 7.44 – 7.22 (m, 1 H), 7.21 – 7.09 (m, 2 H), 3.73 (s, 2 H), 3.70 (s, 3 H), 2.41 (s, 3 H) ppm.

### Methyl 2-(1-(2-chlorobenzoyl)-2-methyl-1H-indol-3-yl)acetate (28)

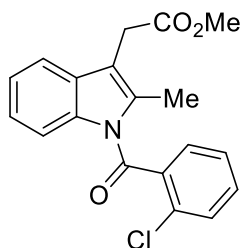

$^1\text{H}$  NMR (500 MHz,  $\text{CDCl}_3$ )  $\delta$  7.61–7.47 (m, 4 H), 7.46–7.38 (m, 1 H), 7.28 (d,  $J = 8.3$  Hz, 1 H), 7.25 (t,  $J = 7.5$  Hz, 1 H), 7.13 (t,  $J = 7.7$  Hz, 1 H), 3.70 (s, 5 H), 2.29 (s, 3 H);  $^{13}\text{C}$  NMR (126 MHz,  $\text{CDCl}_3$ )  $\delta$  171.18, 166.83, 136.37, 135.89, 134.71, 132.14, 131.79, 130.46, 130.16, 129.42, 127.45, 124.15, 123.62, 118.26, 114.62, 113.71, 52.19, 30.09, 13.45 ppm. HRMS (ESI) Calcd for  $[\text{C}_{19}\text{H}_{16}\text{ClNO}_3+\text{H}]^+$ : 342.0891, Found: 342.0889.

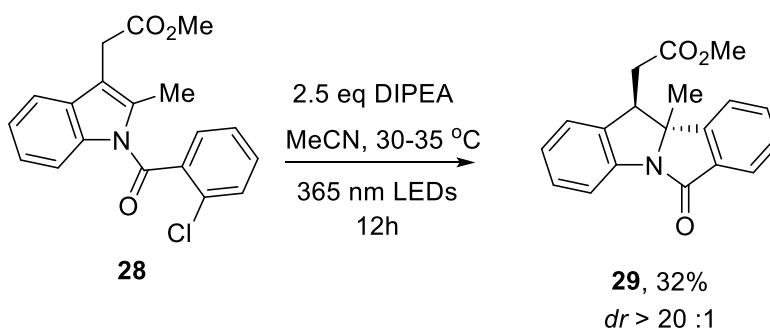

In a 10 mL test tube with a magnetic stirring bar, indole derivative (methyl 2-(1-(2-chlorobenzoyl)-2-methyl-1H-indol-3-yl)acetate (160 mg, 0.47 mmol) and DIPEA (0.2 mL, 2.5 eq) were dissolved in MeCN (5 mL). The test tube was sealed with a septum. The mixture was purged with argon for ten minutes. The mixture was irradiated at 30-35 °C with 365 nm LEDs for 12 h. The solvent was removed under reduced pressure. The residue was purified with flash column chromatography (PE:EA = 10:1) to afford the product respectively in 32% yield.

#### Methyl 2-(10b-methyl-6-oxo-10b,11-dihydro-6H-isindolo[2,1-a]indol-11-yl)acetate (29)

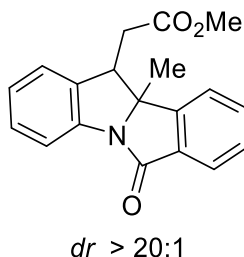

$^1\text{H}$  NMR (400 MHz,  $\text{CDCl}_3$ )  $\delta$  7.90 (d,  $J = 7.6$  Hz, 1 H), 7.66 (d,  $J = 7.7$  Hz, 1 H), 7.61 (td,  $J = 7.5, 1.2$  Hz, 1 H), 7.51 (t,  $J = 7.5$  Hz, 1 H), 7.44 (d,  $J = 7.6$  Hz, 1 H), 7.36–7.32 (dt,  $J = 7.9$ , m, 1 H), 7.13 (d,  $J = 4.1$  Hz, 2 H), 3.82 (s, 3 H), 3.81 (t,  $J = 7.5$  Hz, 1 H), 3.04 (dd,  $J = 15.6, 7.1$  Hz, 1 H), 2.95 (dd,  $J = 15.6, 7.7$  Hz, 1 H), 1.56 (s, 3 H);  $^{13}\text{C}$  NMR (101 MHz,  $\text{CDCl}_3$ )  $\delta$  172.50,

167.31, 150.18, 138.74, 138.47, 132.74, 132.70, 128.93, 128.53, 125.04, 124.83, 123.89, 122.22, 117.46, 74.86, 52.18, 46.25, 33.12, 21.53 ppm. HRMS ESI) Calcd for  $[C_{19}H_{17}NO_3+H]^+$ : 308.1281, Found: 308.1275.

### Scheme S6: Synthesis of glioperazine C analogues

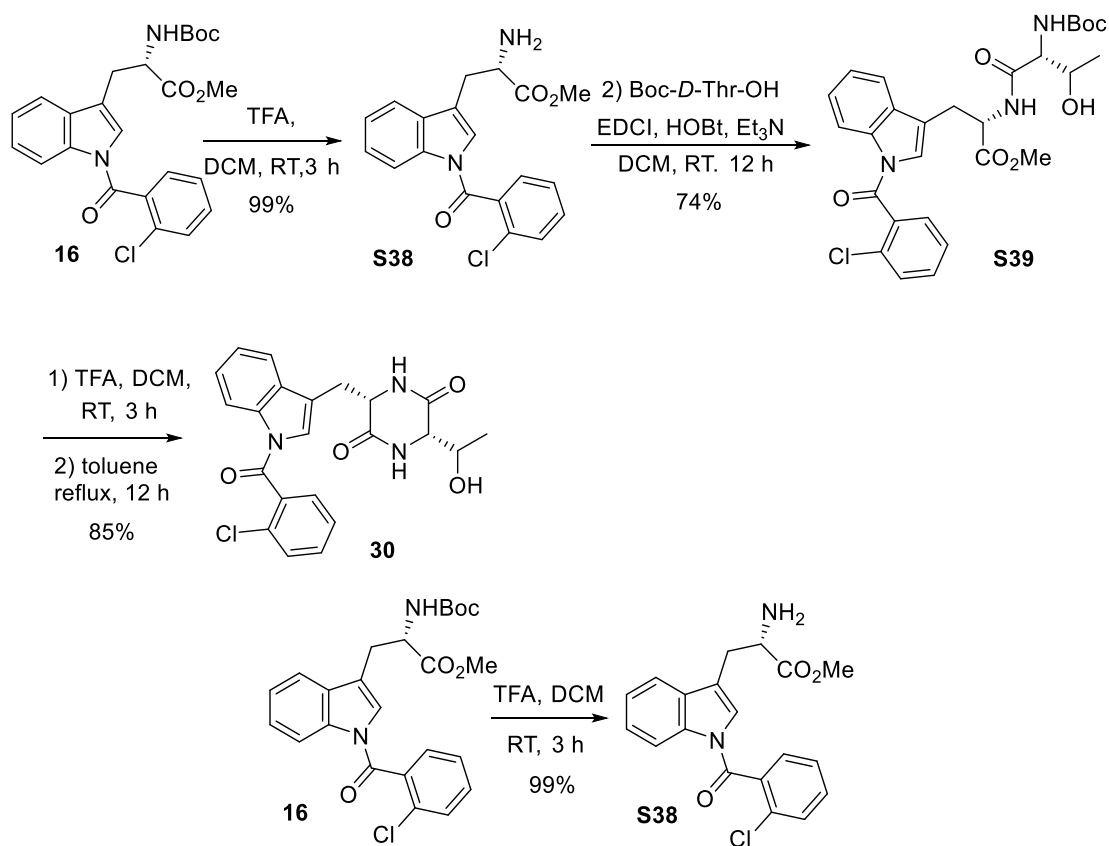

To a stirred solution of compound **16** (400 mg, 0.88 mmol) in CH<sub>2</sub>Cl<sub>2</sub> (10 mL) was dropwise added TFA (4.0 mL) at 0 °C. The solution was stirred at room temperature for 3 h. The reaction mixture was evaporated. The residue was dissolved in DCM (20 mL), washed with NaHCO<sub>3</sub>, brine, dried over anhydrous Na<sub>2</sub>SO<sub>4</sub> and evaporated used in the next step without further purification.

### (L-)Methyl 1-(2-chlorobenzoyl)tryptophanate (S38)

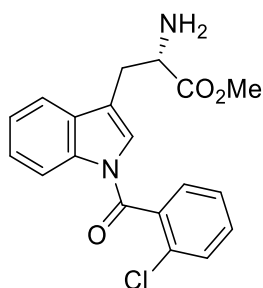



$^1\text{H}$  NMR (400 MHz,  $\text{CDCl}_3$ )  $\delta$  8.46 (s, 1 H), 7.60 (d,  $J = 7.7$  Hz, 1 H), 7.53–7.50 (m, 3 H), 7.49–7.42 (m, 2 H), 7.40 (d,  $J = 7.3$  Hz, 1 H), 7.36 (d,  $J = 7.4$  Hz, 1 H), 6.87 (br, 1 H), 3.81 (d,  $J = 6.5$  Hz, 1 H), 3.68 (s, 3 H), 3.17 (dd,  $J = 14.4, 4.8$  Hz, 1 H), 2.94 (dd,  $J = 14.4, 7.6$  Hz, 1 H);  $^{13}\text{C}$  NMR (101 MHz,  $\text{CDCl}_3$ )  $\delta$  175.25, 165.63, 135.76, 134.86, 131.73, 131.17, 131.04, 130.14, 128.89, 127.23, 125.64, 124.71, 124.32, 119.04, 118.72, 116.69, 54.20, 52.10, 30.45 ppm.

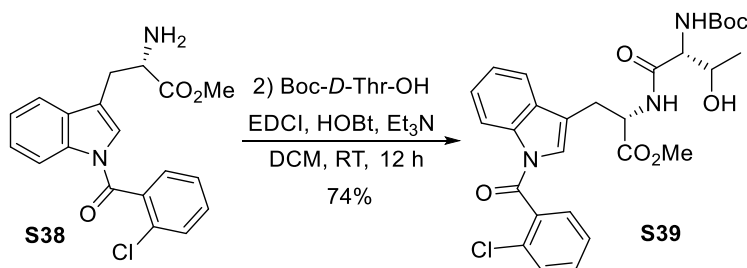

To a solution of indole derivative **S38** (230 mg, 0.64 mmol) in  $\text{CH}_2\text{Cl}_2$  (10 mL), EDCI (150 mg, 0.77 mmol, 1.2 eq), HOBT (100 mg, 0.77 mmol, 1.2 equiv) and *N*-Boc-*D*-Thr (170 mg, 0.77 mmol, 1.2 equiv) were added at room temperature. The solution was stirred at room temperature overnight. After completion of the reaction, the solution was washed with brine. The organic layer was dried over anhydrous  $\text{Na}_2\text{SO}_4$  and evaporated. The crude product was purified by silica gel column chromatography ( $\text{CH}_2\text{Cl}_2$ :MeOH=100:1) to give the desired product (270 mg, 74%) as a white solid.

**(*L*)-Methyl *N*-((*tert*-butoxycarbonyl)-*D*-allothreonyl)-1-(2-chlorobenzoyl)-tryptophanate (**S39**)**

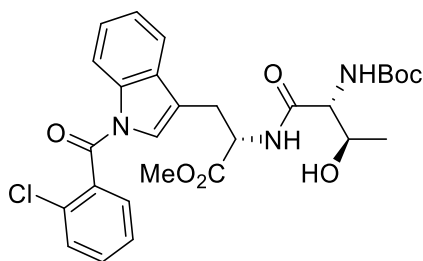

$^1\text{H}$  NMR (400 MHz,  $\text{CDCl}_3$ )  $\delta$  8.41 (br, 1 H), 7.58–7.49 (m, 3 H), 7.46 (dd,  $J = 6.5, 2.2$  Hz, 1 H), 7.42 (d,  $J = 7.9$  Hz, 1 H), 7.39 (d,  $J = 4.1$  Hz, 1 H), 7.35 (d,  $J = 7.3$  Hz, 1 H), 7.18 (d,  $J = 7.2$  Hz, 1 H), 6.85 (br, 1 H), 5.45 (d,  $J = 7.7$  Hz, 1 H), 4.86 (q,  $J = 6.5$  Hz, 1 H), 4.26 (d,  $J = 5.9$  Hz, 1 H), 4.01 (d,  $J = 7.5$  Hz, 1 H), 3.62 (s, 3 H), 3.39–3.09 (m, 3 H), 1.40 (s, 9 H), 1.10 (d,  $J = 6.5$  Hz, 3 H);  $^{13}\text{C}$  NMR (101 MHz,  $\text{CDCl}_3$ )  $\delta$  171.64, 171.59, 165.63, 156.45, 135.66, 134.76, 131.74, 131.17, 130.84, 130.12, 128.93, 127.21, 125.72, 124.70, 124.44, 118.78, 117.53, 116.70, 80.45, 66.68, 58.08, 52.54, 52.24, 28.22, 27.44, 18.26 ppm. HRMS (ESI) Calcd for  $[\text{C}_{28}\text{H}_{32}\text{ClN}_3\text{O}_7+\text{H}]^+$ : 558.2002, Found: 558.1996.

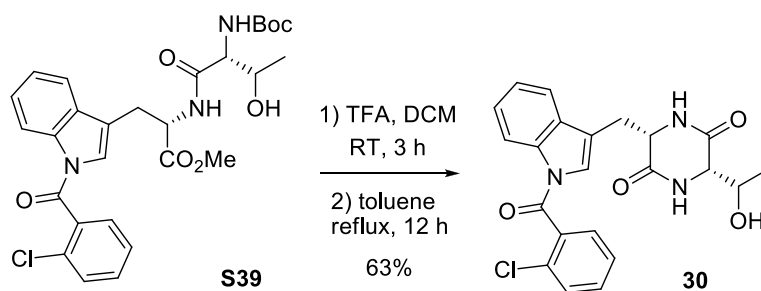

To a stirred solution of **S39** (270 mg, 0.48 mmol) in  $\text{CH}_2\text{Cl}_2$  (10 mL) was dropwise added TFA (3.0 mL) at 0 °C. The solution was stirred at room temperature for 3 h. The reaction mixture was evaporated and the residue was dissolved in  $\text{CH}_2\text{Cl}_2$  (20 mL), washed with  $\text{NaHCO}_3$ , brine, dried over anhydrous  $\text{Na}_2\text{SO}_4$  and evaporated used in the next step without further purification. The residue was dissolved in toluene (10 mL), and stirred under reflux 12 h with white solid precipitated out of solution. The solid was filtered and washed with  $\text{Et}_2\text{O}$  to give the product (130 mg, 63%) as a white solid.

**(3*S*,6*S*)-3-((1-(2-Chlorobenzoyl)-1*H*-indol-3-yl)methyl)-6-((*R*)-1-hydroxyethyl)piperazine-2,5-dione (**30**)**

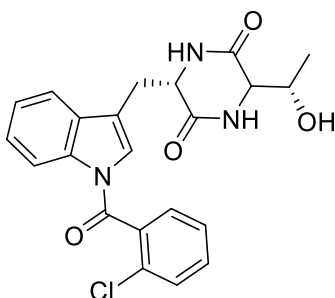

$^1\text{H}$  NMR (500 MHz,  $\text{DMSO}-d_6$ )  $\delta$  8.28 (br, 1 H), 8.03 (d,  $J = 9.1$  Hz, 2 H), 7.77 (d,  $J = 7.3$  Hz, 1 H), 7.72–7.65 (m, 3 H), 7.57 (td,  $J = 7.2, 1.9$  Hz, 1 H), 7.39–7.33 (m, 2 H), 7.01 (br, 1 H), 4.98 (d,  $J = 5.4$  Hz, 1 H), 4.20 (t,  $J = 4.6$  Hz, 1 H), 3.97 (td,  $J = 7.3, 3.7$  Hz, 1 H), 3.26 (t,  $J = 2.6$  Hz, 1 H), 3.17 (dd,  $J = 14.9, 4.4$  Hz, 1 H), 3.00 (dd,  $J = 14.8, 4.7$  Hz, 1 H), 1.04 (d,  $J = 6.5$  Hz, 3 H);  $^{13}\text{C}$  NMR (126 MHz,  $\text{DMSO}-d_6$ )  $\delta$  168.65, 168.63, 165.65, 135.14, 134.75, 132.75, 131.99, 130.39, 130.29, 129.56, 128.30, 126.03, 125.51, 124.51, 120.64, 118.53, 115.84, 68.65, 61.16, 53.65, 26.67, 20.30 ppm. HRMS (ESI) Calcd for  $[\text{M} + \text{MeOH} + \text{H}^+]$   $\text{C}_{23}\text{H}_{25}\text{ClN}_3\text{O}_5$ : 458.1477, Found: 458.1473.  $[\alpha]_D^{25} = +33.5$  (c 0.25, MeOH).

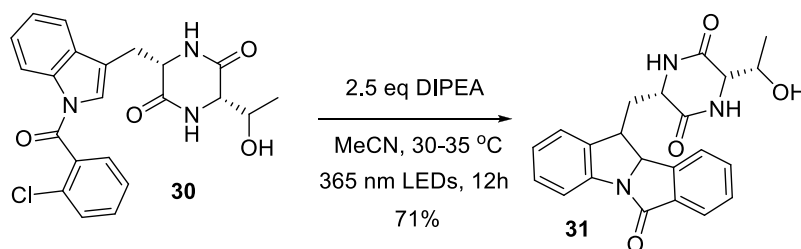

In a 10 mL test tube with a magnetic stirring bar, **30** (85.2 mg, 0.2 mmol) and DIPEA (83  $\mu$ L, 0.5 mmol, 2.5 equiv) were dissolved in MeCN (4 mL). The test tube was sealed with a septum. The mixture was purged with argon for ten minutes, then the mixture was irradiated at 30-35  $^{\circ}$ C with 365 nm LEDs for 12 h. The solvent was removed under reduced pressure. The residue was purified with flash column chromatography (CH<sub>2</sub>Cl<sub>2</sub>:MeOH = 50:1) to afford the product as a white solid in 71% yield (*trans* only).

**(3*R*,6*R*)-3-((*R*)-1-Hydroxyethyl)-6-((6-oxo-10*b*,11-dihydro-6*H*-isoindolo[2,1-*a*]indol-11-yl)methyl)piperazine-2,5-dione (**31**)**

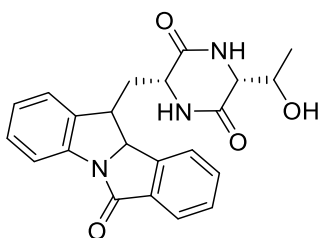

<sup>1</sup>H NMR (500 MHz, DMSO-*d*<sub>6</sub>)  $\delta$  8.58 (br, 1 H), 8.39–8.28 (m, 1 H), 7.84 (d, *J* = 7.6 Hz, 1 H), 7.78 (d, *J* = 7.4 Hz, 1 H), 7.74 (d, *J* = 7.4 Hz, 1 H), 7.58 (t, *J* = 7.4 Hz, 1 H), 7.51 (d, *J* = 7.4 Hz, 1 H), 7.39 (d, *J* = 7.5 Hz, 1 H), 7.32 (t, *J* = 7.6 Hz, 1 H), 7.14 (t, *J* = 7.4 Hz, 1 H), 5.46 (d, *J* = 9.4 Hz, 1 H), 4.90 (s, 1 H), 4.54 (s, 1 H), 2.93 (d, *J* = 4.9 Hz, 1 H), 2.59–2.52 (m, 1 H), 1.86 (s, 1 H), 1.16 (m, 1 H), 0.93 (d, *J* = 6.3 Hz, 3 H); <sup>13</sup>C NMR (126 MHz, DMSO-*d*<sub>6</sub>)  $\delta$  174.37, 172.59, 168.08, 146.05, 140.53, 140.09, 133.46, 133.36, 129.44, 128.34, 125.38, 125.09, 124.54, 124.14, 116.24, 70.66, 68.20, 61.06, 52.68, 43.04, 35.34, 20.46 ppm. HRMS (ESI) Calcd for [C<sub>22</sub>H<sub>21</sub>N<sub>3</sub>O<sub>4</sub>+H]<sup>+</sup>: 392.1605, Found: 392.1600. [ $\alpha$ ]<sub>D</sub><sup>25</sup> = +19.0 (c 0.25, MeOH).

### Scheme S7: Synthesis of compound 32

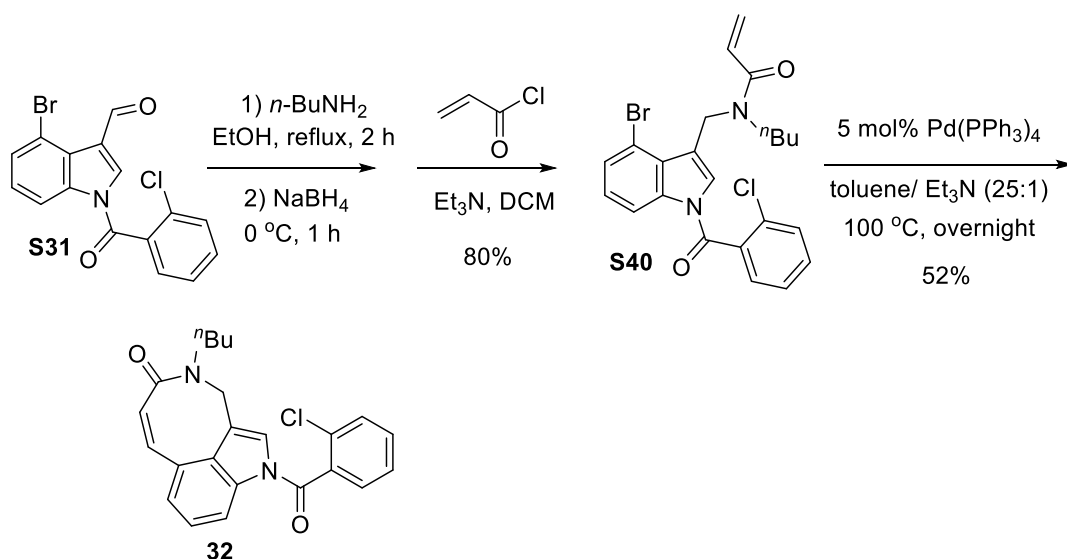

In a 50 mL round-bottom flask charged with a magnetic stirring bar, to a suspension of indole derivative **S31** (1.0 equiv) in EtOH (20 mL), butan-1-amine (1.0 equiv) was added. The mixture was heated to reflux for 2 h. Then the mixture was cooled down to room temperature.  $\text{NaBH}_4$  (4 equiv) was added slowly. After 1 h, the mixture was quenched with MeOH. Water was added to quench the reaction and extracted with  $\text{CH}_2\text{Cl}_2$  ( $3 \times 20$  mL). The combined organic layer was washed with brine, dried over  $\text{Na}_2\text{SO}_4$ . The solvent was removed under reduced pressure. The residue was subjected to next step without purification

In a 50 mL round-bottom flask charged with a magnetic stirring bar, to above substrate in DCM (20 mL), acryloyl chloride (1.0 equiv) and  $\text{Et}_3\text{N}$  (1.5 equiv) were added. The mixture was stirred at room temperature overnight. The mixture was quenched with water and extracted with  $\text{CH}_2\text{Cl}_2$  (3 times). The combined organic layer was washed with brine, dried over  $\text{Na}_2\text{SO}_4$ . The solvent was removed under reduced pressure. The residue was purified by flash column chromatography (PE:EA = 4:1, 1:1) to afford the product in 80% yield.

#### *N*-((4-Bromo-1-(2-chlorobenzoyl)-1H-indol-3-yl)methyl)-*N*-butylacrylamide (**S40**)

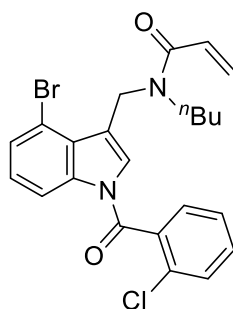

amide's rotamer 3:2

$^1\text{H}$  NMR (400 MHz,  $\text{CDCl}_3$ )  $\delta$  8.50 (s, 0.6 H), 8.36 (s, 0.4 H), 7.56 – 7.41 (m, 5 H), 7.30 (t,  $J$  = 8.1 Hz, 0.6 H), 7.23 (t,  $J$  = 8.0 Hz, 0.4 H), 6.86 (s, 0.4 H), 6.71 (s, 0.6 H), 6.55 (dd,  $J$  = 16.6, 10.6 Hz, 0.4 H), 6.45 (dd,  $J$  = 16.6, 10.2 Hz, 0.6 H), 6.34 (d,  $J$  = 13.4 Hz, 0.6 H), 6.30 (d,  $J$  = 13.4 Hz, 0.4 H), 5.68 (d,  $J$  = 10.7 Hz, 0.4 H), 5.63 (dd,  $J$  = 10.1, 3.0 Hz, 0.6 H), 5.03 (s, 2 H), 3.41 (t,  $J$  = 7.7 Hz, 1.2 H), 3.35 (t,  $J$  = 7.8 Hz, 0.8 H), 1.57 (m, 2 H), 1.32 (td,  $J$  = 14.7, 7.3 Hz, 2 H), 0.93 (t,  $J$  = 7.3 Hz, 3 H);  $^{13}\text{C}$  NMR (126 MHz,  $\text{CDCl}_3$ )  $\delta$  166.57, 166.43, 165.71, 165.54, 137.74, 137.36, 134.25, 132.50, 132.06, 131.20, 131.08, 130.32, 130.11, 129.21, 128.98, 128.85, 128.71, 128.58, 128.32, 128.16, 127.61, 127.46, 127.32, 126.94, 126.42, 125.98, 124.97, 120.75, 119.75, 115.96, 115.69, 113.92, 113.73, 47.57, 47.09, 46.02, 42.26, 31.72, 30.24, 20.30, 19.99, 13.91, 13.80 ppm. HRMS (ESI) Calcd for  $[\text{C}_{23}\text{H}_{22}\text{BrClN}_2\text{O}_2+\text{H}]^+$ : 473.0626, Found: 473.0619.

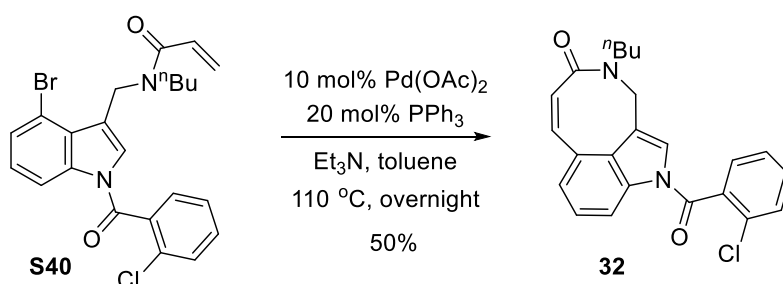

In a 25 mL Schlenk tube charged with a magnetic stirring bar, indole derivative **S40** (1.0 equiv) was added. The Schlenk tube was evacuated and back-filled with argon three times. Then  $\text{Et}_3\text{N}$  (0.2 mL),  $\text{Pd}(\text{PPh}_3)_4$  (16 mg) and toluene (5 mL) were added. The mixture was degassed by freeze-pump-thaw cycle for three times and back-filled with argon. The mixture was heated to reflux overnight. TLC indicated the substrate was consumed completely. The solvent was removed under reduced pressure. The residue was purified with flash column chromatography (PE:EA = 10:1 to 4:1) to afford the product in 50% yield.

**(Z)-9-Butyl-2-(2-chlorobenzoyl)-9,10-dihydroazocino[3,4,5-cd]indol-8(2H)-one (32)**

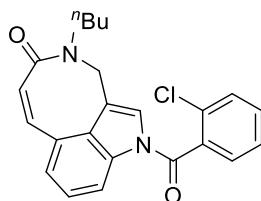

$^1\text{H}$  NMR (500 MHz,  $\text{CDCl}_3$ )  $\delta$  8.35 (s, 1 H), 7.63–7.52 (m, 3 H), 7.50–7.47 (m, 1 H), 7.37 (t,  $J$  = 7.8 Hz, 1 H), 7.17 (d,  $J$  = 7.6 Hz, 1 H), 6.90 (br, 1 H), 6.83 (d,  $J$  = 13.3 Hz, 1 H), 6.15 (d,  $J$  = 13.3 Hz, 1 H), 5.24 (d,  $J$  = 15.2 Hz, 1 H), 3.85 (d,  $J$  = 15.2 Hz, 1 H), 3.79 (dd,  $J$  = 13.6, 7.1 Hz, 1 H), 2.85 (br, 1 H), 1.59–1.52 (m, 2 H), 1.36–1.26 (m, 2 H), 0.91 (t,  $J$  = 7.4 Hz, 3 H);  $^{13}\text{C}$  NMR (126 MHz,  $\text{CDCl}_3$ )  $\delta$  168.31, 165.69, 136.67, 134.59, 131.98, 131.43, 131.19, 130.25, 129.03,

128.98, 127.40, 127.08, 127.03, 125.96, 125.18, 123.46, 120.55, 116.71, 45.23, 43.67, 29.48, 20.20, 13.91 ppm. HRMS (ESI) Calcd for  $[C_{23}H_{21}ClN_2O_2+H]^+$ : 393.1363, Found: 393.1360.

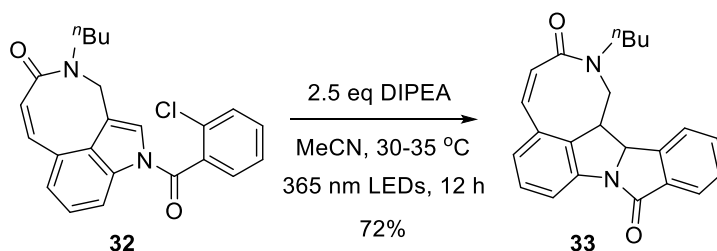

In a 10 mL test tube with a magnetic stirring bar, indole **32** (100 mg, 0.255 mmol) and DIPEA (0.11 mL, 0.638 mmol, 2.5 eq) were dissolved in MeCN (3 mL). The test tube was sealed with a septum. The mixture was purged with argon for ten minutes. Then the mixture was irradiated at 30-35 °C with 365 nm LEDs for 12 h. The solvent was removed under reduced pressure. The residue was purified with flash column chromatography (PE:EA = 1:1) to afford the product in 71% yield.

**(Z)-2-Butyl-1,2,14b,14c-tetrahydroazocino[3,4,5-cd]isoindolo[2,1-a]indole-3,10-dione (33)**

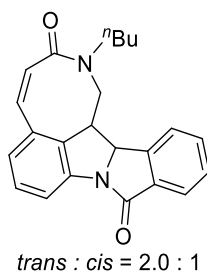

$^1\text{H NMR}$  (400 MHz,  $\text{CDCl}_3$ )  $\delta$  8.28 (d,  $J = 8.3$  Hz, 0.5 H), 7.82 (d,  $J = 7.9$  Hz, 1 H), 7.75 (d,  $J = 6.9$  Hz, 1 H), 7.66 (t,  $J = 8.0$  Hz, 0.5 H), 7.59–7.54 (m, 4 H), 7.51–7.45 (m, 1 H), 7.44–7.32 (m, 2 H), 7.27–7.20 (m, 1 H), 7.20–7.11 (m, 1 H), 6.98 (d,  $J = 7.6$  Hz, 0.5 H), 6.90 (s, 0.5 H), 6.83 (dd,  $J = 13.3, 6.3$  Hz, 1 H), 6.75 (d,  $J = 13.3$  Hz, 0.5 H), 6.17 (d,  $J = 13.2$  Hz, 0.5 H), 6.14 (d,  $J = 13.3$  Hz, 1 H), 5.25 (dd,  $J = 18.8, 15.4$  Hz, 1.5 H), 4.34 (d,  $J = 15.3$  Hz, 0.5 H), 3.97–3.75 (m, 2 H), 2.93 (dt,  $J = 14.0, 7.0$  Hz, 0.5 H), 2.82 (m, 1 H), 1.69–1.60 (m, 1 H), 1.60–1.48 (m, 2 H), 1.40–1.23 (m, 5 H), 0.96–0.87 (m, 5 H);  $^{13}\text{C NMR}$  (101 MHz,  $\text{CDCl}_3$ )  $\delta$  168.46, 168.38, 168.31, 165.70, 134.69, 134.27, 134.00, 132.23, 131.98, 131.65, 131.50, 131.40, 131.18, 130.25, 130.19, 129.22, 129.17, 128.98, 128.92, 128.79, 127.40, 127.06, 127.03, 126.81, 126.63, 126.62, 125.95, 125.93, 125.59, 125.29, 125.08, 124.96, 124.52, 123.47, 120.50, 120.45, 116.64, 113.54, 45.64, 45.22, 43.69, 29.46, 20.30, 20.20, 13.89 ppm. HRMS (ESI) Calcd for  $[C_{23}H_{22}N_2O_2+H]^+$ : 359.1754, Found: 359.1748.

## Large-scale reaction and application

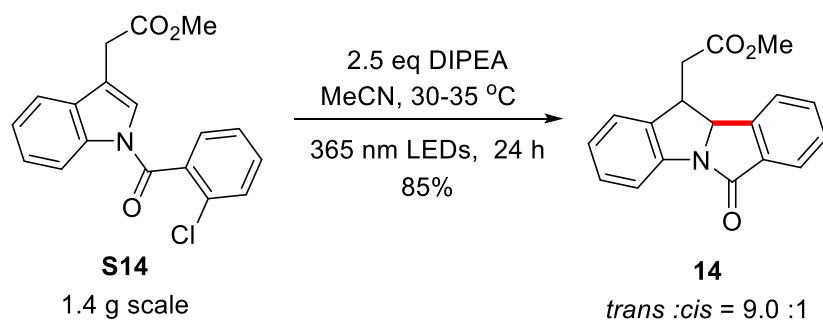

In a 100 mL round-bottom flask with a magnetic stirring bar, methyl 2-(1-(2-chlorobenzoyl)-1H-indol-3-yl)acetate **S14** (1.40 g, 4.3 mmol) and DIPEA (1.87 mL, 10.7 mmol, 2.5 eq) were dissolved in MeCN (20 mL). The round-bottom flask was sealed with a septum. The mixture was purged with argon for ten minutes. Then the mixture was irradiated with 365 nm LEDs at 30-35 °C for 24 h. The solvent was removed under reduced pressure. The residue was purified with flash column chromatography (PE:EA = 10:1) to afford the product (1.10 g) in 85% yield.

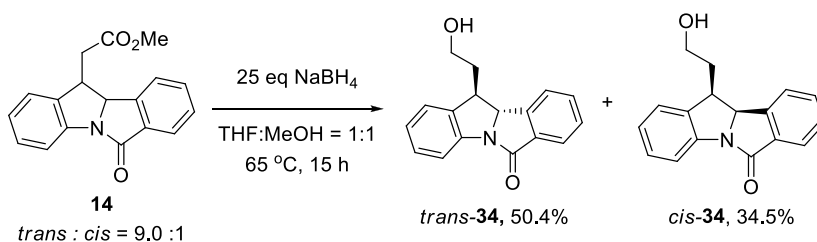

To a 50 mL Schlenk tube was charged with **14** (290 mg, 0.99 mmol), NaBH<sub>4</sub> (93.0 mg, 25 mmol) and dry THF (10 mL) under argon. To the stirred mixture, CH<sub>3</sub>OH (10 mL) was added slowly. The solution became gradually to reflux. When the bubble ceased to evolve, the mixture was heated to reflux for 15 h. The mixture was then quenched with water. The mixture was extracted with CH<sub>2</sub>Cl<sub>2</sub> three times. The combined organic layer was washed with brine (30 mL) and dried over anhydrous Na<sub>2</sub>SO<sub>4</sub>. After filtration and concentration under vacuum, the residue was purified by flash column chromatography on silica gel (PE:EA = 2:1) to afford the products as a white solid with an overall yield of 85%. *Trans-34* was isolated in pure form in 45% yield.

***Trans*-(11-(2-Hydroxyethyl)-10b,11-dihydro-6H-isoindolo[2,1-a]indol-6-one (*trans*-34)**

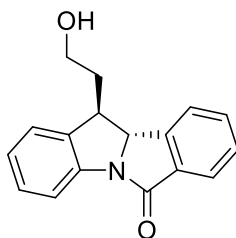

$^1\text{H}$  NMR (400 MHz,  $\text{CDCl}_3$ )  $\delta$  7.84 (d,  $J = 7.6$  Hz, 1 H), 7.64 (dd,  $J = 7.6, 3.3$  Hz, 2 H), 7.54 (t,  $J = 7.5$  Hz, 1 H), 7.45 (t,  $J = 7.4$  Hz, 1 H), 7.22 (t,  $J = 7.6$  Hz, 1 H), 7.15 (d,  $J = 7.5$  Hz, 1 H), 7.02 (t,  $J = 7.5$  Hz, 1 H), 5.31 (d,  $J = 9.3$  Hz, 1 H), 4.11–4.08 (m, 2 H), 3.46–3.36 (m, 1 H), 3.04 (s, 1 H), 2.64–2.39 (m, 1 H), 2.25–2.09 (m, 1 H);  $^{13}\text{C}$  NMR (101 MHz,  $\text{CDCl}_3$ )  $\delta$  168.62, 145.73, 140.11, 139.77, 133.88, 132.76, 128.75, 128.00, 124.67, 124.65, 124.23, 123.35, 116.24, 71.33, 60.49, 43.22, 35.71 ppm. HRMS (ESI) Calcd for  $[\text{C}_{17}\text{H}_{15}\text{NO}_2+\text{H}]^+$ : 266.1176, Found: 266.1171.

***Cis*-(11-(2-Hydroxyethyl)-10b,11-dihydro-6H-isoindolo[2,1-a]indol-6-one (*cis*-34)**

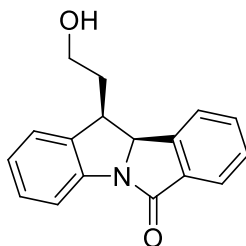

$^1\text{H}$  NMR (500 MHz,  $\text{CDCl}_3$ )  $\delta$  7.92 (d,  $J = 7.6$  Hz, 1 H), 7.74 (d,  $J = 7.7$  Hz, 1 H), 7.62 (d,  $J = 7.5$  Hz, 1 H), 7.60–7.50 (m, 2 H), 7.35 (d,  $J = 7.9$  Hz, 2 H), 7.12 (t,  $J = 7.6$  Hz, 1 H), 5.60 (d,  $J = 7.7$  Hz, 1 H), 3.81–3.76 (m, 1 H), 3.54–3.50 (m, 2 H), 1.85 (br, 1 H), 1.63–1.57 (m, 1 H), 0.93–0.86 (m, 1 H);  $^{13}\text{C}$  NMR (126 MHz,  $\text{CDCl}_3$ )  $\delta$  167.44, 142.69, 139.04, 135.32, 132.20, 128.84, 128.43, 126.19, 124.77, 124.30, 124.01, 116.74, 69.06, 58.76, 39.32, 33.85 ppm. HRMS (ESI) Calcd for  $[\text{C}_{17}\text{H}_{15}\text{NO}_2+\text{H}]^+$ : 266.1176, Found: 266.1170.



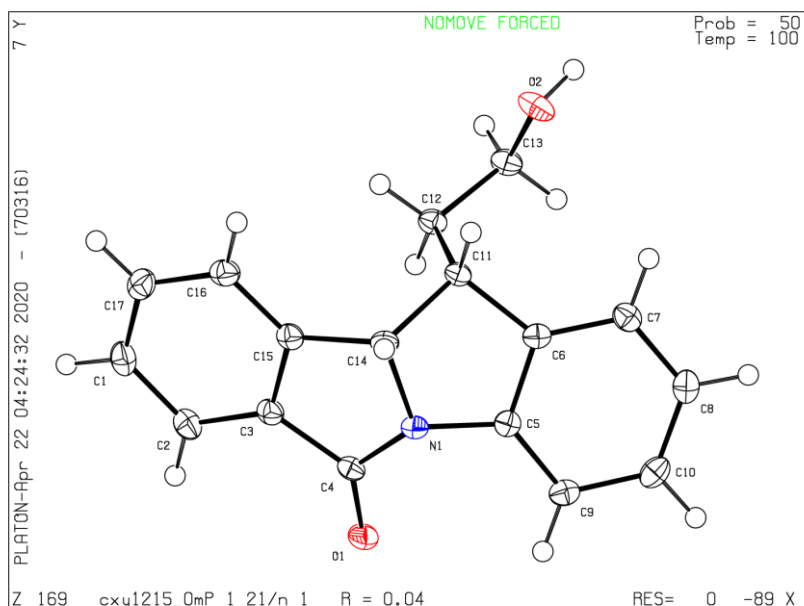

**Figure S13:** X-ray crystal structure of compound *cis*-**34**.

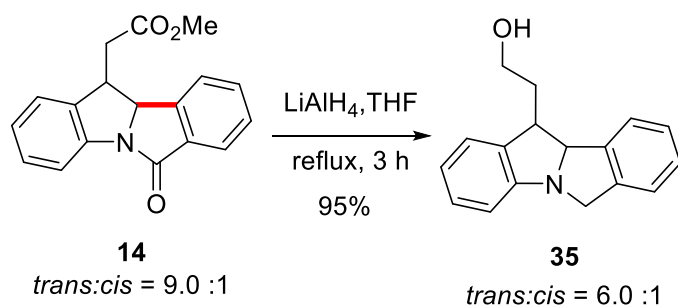

In a 50 mL round-bottom flask charged with a magnetic stirring bar, to a solution of **14** (380 mg, 1.3 mmol) in THF (20 mL), LiAlH<sub>4</sub> (250 mg, 4 eq) was added. The mixture was stirred at 80 °C for 5 h. TLC indicated the substrate was consumed completely. The reaction was quenched with water, extracted with ethyl acetate (15 mL × 3), washed with brine and dried with anhydrous sodium sulfate. The solvent was removed under reduced pressure. The residue was purified with flash column chromatography (PE:EA = 4:1 to 1:1) to obtain the product (310 mg) in 95% yield.

**2-(10b,11-dihydro-6H-isoindolo[2,1-a]indol-11-yl)ethan-1-ol (35)**

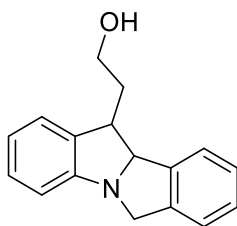

*trans* : *cis* = 6.0 : 1

$^1\text{H}$  NMR (400 MHz,  $\text{CDCl}_3$ )  $\delta$  7.35 (d,  $J = 6.7$  Hz, 1 H), 7.23–7.24 (m, 2 H), 7.24 (d,  $J = 5.7$  Hz, 1 H), 7.16 (t,  $J = 7.2$  Hz, 1 H), 7.09 (d,  $J = 7.3$  Hz, 1 H), 6.90–6.79 (m, 2 H), 4.97 (s, 1 H), 4.63 (d,  $J = 14.0$  Hz, 1 H), 4.53 (d,  $J = 14.9$  Hz, 1 H), 3.98–3.72 (m, 3 H), 3.28 (br, 1 H), 2.25–2.01 (m, 2 H);  $^{13}\text{C}$  NMR (126 MHz,  $\text{CDCl}_3$ )  $\delta$  154.02, 143.20, 139.65, 133.37, 128.12, 127.74, 127.34, 124.57, 122.72, 122.30, 120.93, 112.37, 76.08, 60.55, 58.74, 44.86, 38.94 ppm. HRMS (ESI) Calcd for  $[\text{C}_{17}\text{H}_{17}\text{NO}+\text{H}]^+$ : 252.1383, Found: 252.1379.

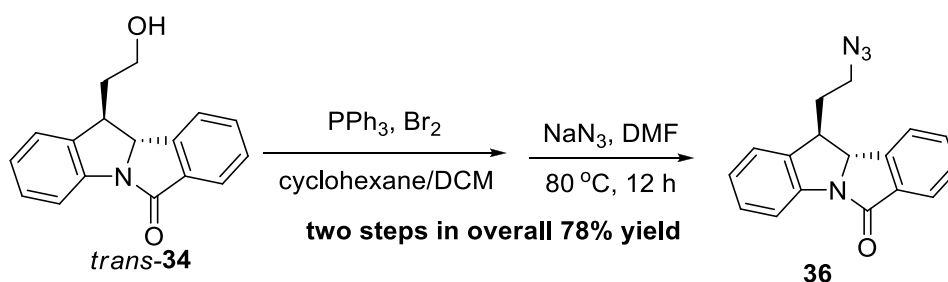

In a 50 mL Schlenk tube charged with a magnetic stirring bar, triphenylphosphine (140 mg) was added. Then the Schlenk tube was evacuated and back-filled with argon three times. Cyclohexane (10 mL),  $\text{Br}_2$  (83.0 mg) were added. A yellow solid was formed immediately and stirred for 10 min at room temperature. *Trans*-**34** (110 mg) dissolved in  $\text{CH}_2\text{Cl}_2$  (2 mL) was added dropwise. The mixture was stirred at room temperature for 5 h. TLC indicated the substrate was consumed completely. The solvent was removed under reduced pressure. Filtration over Celite and concentration of the filtrate in vacuo yielded the corresponding product. To the aforementioned product, DMF (10 mL),  $\text{NaN}_3$  (28.0 mg) were added. The mixture was heated to 80  $^\circ\text{C}$  overnight. The solvent was removed under reduced pressure. The residue was purified with flash column chromatography (PE:EA = 10:1) to obtain the product 78% yield for two steps.

**Trans-11-(2-Azidoethyl)-10b,11-dihydro-6H-isoindolo[2,1-a]indol-6-one (36)**

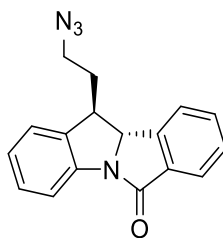

$^1\text{H}$  NMR (400 MHz,  $\text{CDCl}_3$ )  $\delta$  7.92 (d,  $J = 7.6$  Hz, 1 H), 7.71 (d,  $J = 7.8$  Hz, 1 H), 7.65 (t,  $J = 7.4$  Hz, 1 H), 7.56 (d,  $J = 4.6$  Hz, 1 H), 7.55–7.50 (m, 1 H), 7.33 (t,  $J = 7.6$  Hz, 1 H), 7.22 (d,  $J = 7.6$  Hz, 1 H), 7.13 (t,  $J = 7.5$  Hz, 1 H), 5.32 (d,  $J = 9.3$  Hz, 1 H), 3.82–3.69 (m, 2 H), 3.53–3.47 (m, 1 H), 2.55–2.47 (m, 1 H), 2.31–2.22 (m, 1 H);  $^{13}\text{C}$  NMR (126 MHz,  $\text{CDCl}_3$ )  $\delta$  168.36, 145.22, 140.50, 138.48, 134.03, 132.82, 129.01, 128.47, 125.05, 124.69, 124.02, 122.84, 116.59, 70.69, 49.23, 43.74, 31.85 ppm. HRMS (ESI) Calcd for  $[\text{C}_{17}\text{H}_{14}\text{N}_4\text{O}+\text{H}]^+$ : 291.1240, Found: 291.1238.

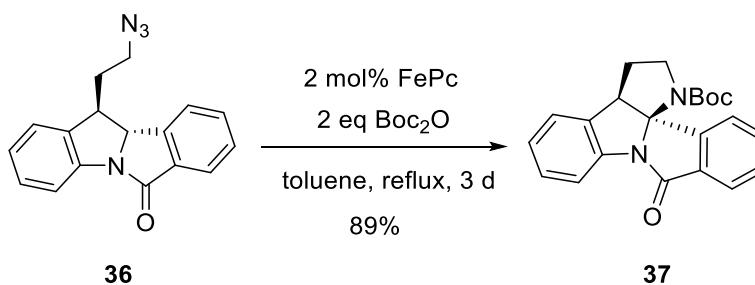

In a 25 mL Schlenk tube charged with a magnetic stirring bar, iron(II) phthalocyanine (FePc, 1.50 mg) and  $\text{Boc}_2\text{O}$  (44.4 mg) were added. The Schlenk tube was evacuated and back-filled with argon three times. Then **36** (39.4 mg) in toluene (5 mL) was added. The mixture was degassed by freeze-pump-thaw cycle for three times and back-filled with argon. The mixture was heated to reflux for 3 days. TLC indicated the substrate was consumed completely. The solvent was removed under reduced pressure. The residue was purified with flash column chromatography (PE : EA = 10 : 1) to obtain the product (43.7 mg) in 89% yield.

**Tert-Butyl-8-Oxo-1,13b-dihydro-8H-isoindolo[2,1-a]pyrrolo[2,3-b]indole-3(2H)-carboxylate (37)**

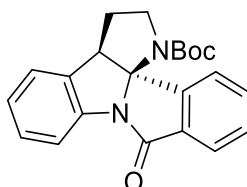

$^1\text{H}$  NMR (500 MHz,  $\text{CDCl}_3$ )  $\delta$  7.74 (d,  $J = 7.5$  Hz, 1 H), 7.58 (d,  $J = 7.8$  Hz, 1 H), 7.54 (t,  $J = 7.4$  Hz, 1 H), 7.43 (t,  $J = 7.4$  Hz, 1 H), 7.36 (d,  $J = 7.5$  Hz, 1 H), 7.25 (t,  $J = 7.6$  Hz, 1 H), 7.13 (d,  $J = 7.4$  Hz, 1 H), 7.06 (t,  $J = 7.4$  Hz, 1 H), 3.93 (d,  $J = 6.5$  Hz, 1 H), 3.89 (t,  $J = 8.7$  Hz, 1 H),

3.29 (td,  $J = 11.2, 5.9$  Hz, 1 H), 2.60–2.44 (m, 1 H), 2.35 (dd,  $J = 12.8, 5.8$  Hz, 1 H), 0.97 (s, 9 H);  $^{13}\text{C}$  NMR (126 MHz,  $\text{CDCl}_3$ )  $\delta$  168.06, 152.18, 146.25, 139.80, 135.50, 132.48, 132.07, 128.29, 127.77, 123.86, 123.28, 122.95, 120.53, 116.46, 89.98, 79.51, 51.88, 45.39, 26.78, 26.23 ppm. HRMS (ESI) Calcd for  $[\text{C}_{22}\text{H}_{22}\text{N}_2\text{O}_3+\text{H}]^+$ : 363.1703, Found: 363.1696.

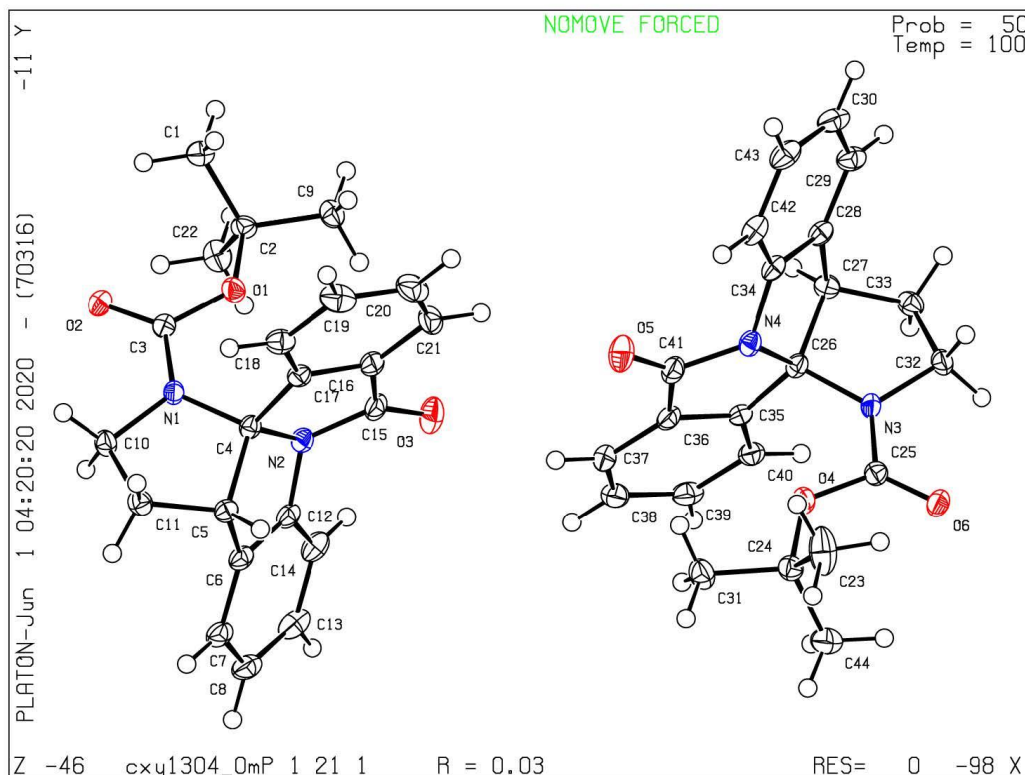

**Figure S14:** X-ray crystal structure of compound **37**

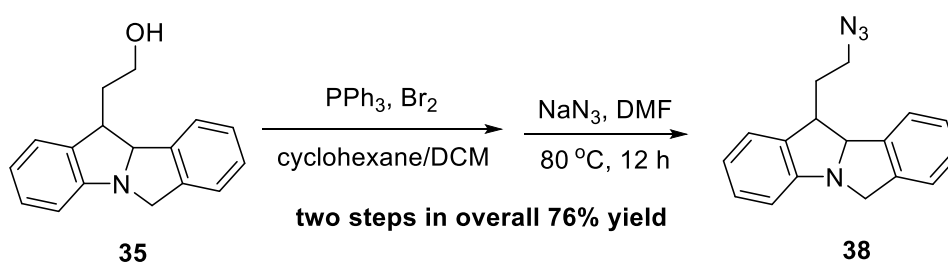

In a 25 mL Schlenk tube charged with a magnetic stirring bar, triphenylphosphine (12.0 mg) was added. Then the Schlenk tube was evacuated and back-filled with argon three times. Cyclohexane (10 mL),  $\text{Br}_2$  (25  $\mu\text{L}$ ) were added. A yellow solid was formed immediately and stirred for 10 min at room temperature. **35** (96.3 mg) dissolved in  $\text{CH}_2\text{Cl}_2$  (2 mL) was added dropwise. The mixture was stirred at room temperature for 5 h. TLC indicated the substrate was consumed completely. The solvent was removed under reduced pressure. Filtration over Celite



***tert*-Butyl 1,13b-dihydro-8H-isoindolo[2,1-a]pyrrolo[2,3-b]indole-3(2H)-carboxylate (39)**

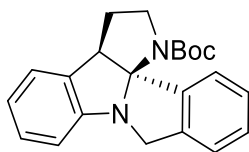

$^1\text{H}$  NMR (500 MHz,  $\text{CDCl}_3$ )  $\delta$  7.70 (d,  $J = 7.3$  Hz, 1 H), 7.54 (d,  $J = 7.9$  Hz, 1 H), 7.37 (d,  $J = 7.5$  Hz, 1 H), 7.31 (t,  $J = 7.4$  Hz, 1 H), 7.24 (d,  $J = 8.1$  Hz, 1 H), 7.21 (t,  $J = 7.7$  Hz, 1 H), 7.12 (t,  $J = 7.5$  Hz, 1 H), 7.03 (t,  $J = 7.4$  Hz, 1 H), 4.94 (s, 2 H), 4.59 (t,  $J = 6.4$  Hz, 1 H), 3.41 (t,  $J = 6.6$  Hz, 2 H), 3.15 (t,  $J = 6.7$  Hz, 2 H), 1.33 (s, 9 H);  $^{13}\text{C}$  NMR (126 MHz,  $\text{CDCl}_3$ )  $\delta$  156.14, 141.82, 141.13, 133.85, 133.30, 132.52, 128.37, 126.84, 124.49, 123.68, 121.80, 121.21, 119.71, 119.32, 112.60, 110.59, 109.35, 103.76, 48.29, 41.49, 28.55, 25.28 ppm. HRMS (ESI) Calcd for  $[\text{C}_{22}\text{H}_{24}\text{N}_2\text{O}_2+\text{H}]^+$ : 349.1911, Found: 349.1902.

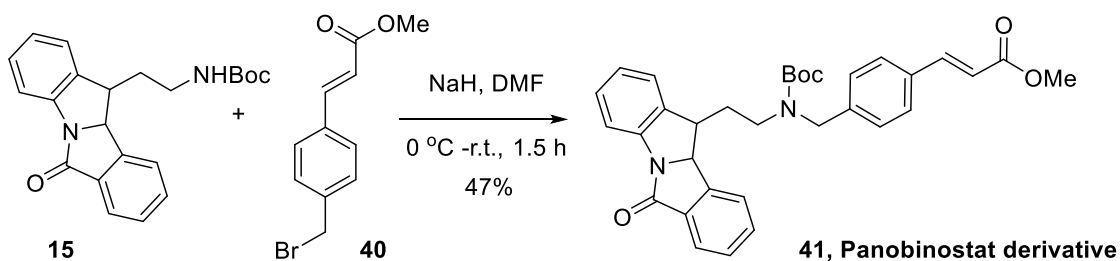

In a 25 mL Schlenk tube charged with a magnetic stirring bar, compound **15** (11.0 mg, 0.30 mmol) was added. The Schlenk tube was evacuated and back-filled with argon three times. Then DMF (5 mL), NaH (24.0 mg, 0.6 mmol) were added. The mixture was stirred at 0 °C for 30 min. methyl (*E*)-3-(4-(bromomethyl)phenyl)acrylate **40** (84.2 mg, 0.33 mmol) was added. The mixture was stirred at room temperature for 1 h. TLC indicated the substrate was consumed completely. The solvent was removed under reduced pressure. The residue was purified with flash column chromatography (PE:EA = 4:1) to afford the product (75.3 mg) in 47% yield.

**Methyl (*E*)-3-(4-(((*tert*-butoxycarbonyl)(2-(6-oxo-10b,11-dihydro-6H-isoindolo[2,1-a]indol-11-yl)ethyl)amino)methyl)phenyl)acrylate (41)**

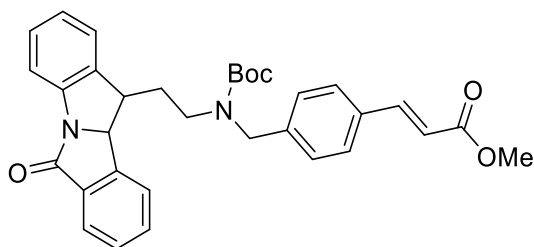

$^1\text{H}$  NMR (400 MHz,  $\text{CDCl}_3$ )  $\delta$  7.77 (d,  $J = 7.7$  Hz, 1 H), 7.64 (d,  $J = 7.3$  Hz, 3 H), 7.52 (d,  $J = 16.0$  Hz, 1 H), 7.42 (m, 4 H), 7.16 (t,  $J = 8.2$  Hz, 3 H), 6.69 (d,  $J = 8.0$  Hz, 2 H), 6.29 (d,  $J =$

16.0 Hz, 1 H), 4.45 (t,  $J = 5.7$  Hz, 1 H), 3.87–3.81 (m, 1 H), 3.77 (s, 3 H), 3.34 (dd,  $J = 10.8, 4.5$  Hz, 1 H), 3.20 (s, 2 H), 3.00 (m, 1 H), 1.85 (s, 1 H) 1.43 (s, 9 H);  $^{13}\text{C}$  NMR (101 MHz,  $\text{CDCl}_3$ )  $\delta$  167.46, 166.96, 155.97, 145.14, 144.51, 138.64, 137.74, 136.92, 134.68, 132.67, 131.97, 130.50, 128.95, 128.81, 127.26, 126.55, 124.70, 124.58, 123.74, 117.34, 117.26, 79.43, 78.40, 51.66, 47.01, 44.43, 37.54, 33.36, 28.39 ppm. HRMS (ESI) Calcd for  $[\text{C}_{33}\text{H}_{34}\text{N}_2\text{O}_5+\text{H}]^+$ : 539.2540, Found: 539.2553.

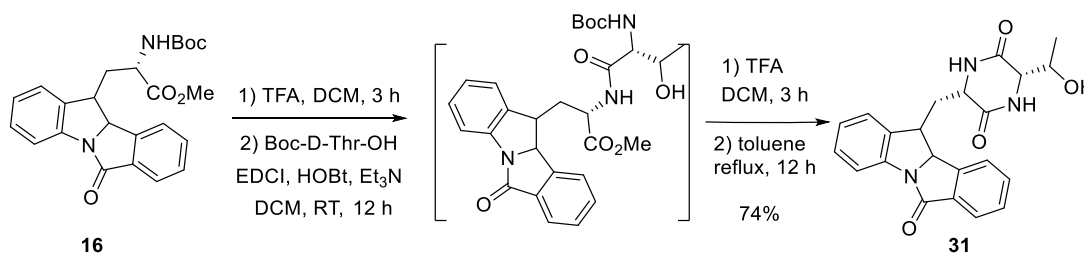

To a stirred solution of compound **16** (400 mg, 0.95 mmol) in  $\text{CH}_2\text{Cl}_2$  (10 mL) was dropwise added TFA (4.0 mL) at 0 °C. The solution was stirred at room temperature for 3 h. The reaction mixture was evaporated and the residue was dissolved in  $\text{CH}_2\text{Cl}_2$  (20 mL), washed with  $\text{NaHCO}_3$ , brine, dried over anhydrous  $\text{Na}_2\text{SO}_4$  and evaporated. The crude product was used in the next step without further purification.

To a solution of indole derivative in  $\text{CH}_2\text{Cl}_2$  (10 mL), EDCI (210 mg, 1.2 eq), HOBT (150 mg, 1.2 equiv) and *N*-Boc-*D*-Thr (240 mg, 1.2 equiv) were added at room temperature. The solution was stirred at room temperature overnight. After completion of the reaction, the solution was washed with brine. The organic layer was dried over anhydrous  $\text{Na}_2\text{SO}_4$  and evaporated. The crude product was purified by silica gel column chromatography ( $\text{DCM} : \text{MeOH} = 100 : 1$ ) to give the desired product.

To a stirred solution of the above obtained product in  $\text{CH}_2\text{Cl}_2$  (10 mL) was dropwise added TFA (4.0 mL) at 0 °C. The solution was stirred at room temperature for 3 h. The reaction mixture was evaporated under reduced pressure. The residue was dissolved in  $\text{CH}_2\text{Cl}_2$  (20 mL), washed with  $\text{NaHCO}_3$ , brine, dried over anhydrous  $\text{Na}_2\text{SO}_4$  and evaporated to dryness. The residue was dissolved in toluene (10 mL), and stirred under reflux 12 h. A white solid precipitated out of solution. The solid was filtered and washed with  $\text{Et}_2\text{O}$  to give the solid (276 mg) in 74% yield.

## Mechanistic experiments

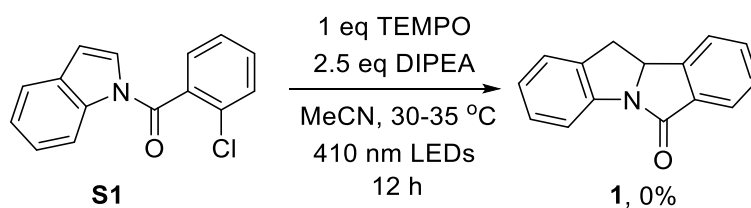

In a 10 mL test tube with a magnetic stirring bar, indole derivative (0.2 mmol), DIPEA (87  $\mu$ L, 2.5 equiv) and TEMPO (0.2 mmol, 1.0 equiv) were dissolved in MeCN (2.0 mL). The test tube was sealed with a septum. The mixture was purged with argon for ten minutes, then the mixture was irradiated at 30-35 °C with 410 nm LEDs for 12 h. The solvent was removed under reduced pressure. 1,3,5-trimethoxybenzene (0.2 mmol) was added. The mixture was analyzed by  $^1\text{H}$  NMR and GC-MS.

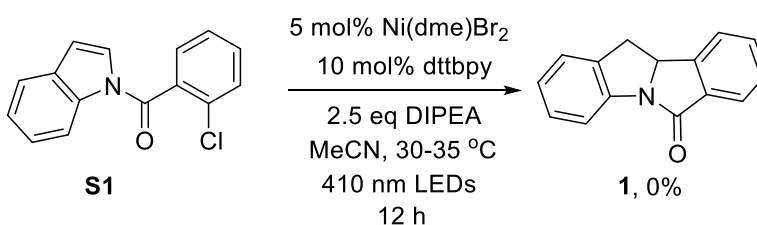

In a 10 mL test tube with a magnetic stirring bar, indole derivative (0.2 mmol), DIPEA (87  $\mu$ L, 2.5 equiv) Ni(dme)Br<sub>2</sub> (3.1 mg, 0.001 mmol, 5 mol%) and dttbpy (5.4 mg, 0.02 mmol, 10 mol%) were dissolved in MeCN (2.0 mL). The test tube was sealed with a septum. The mixture was purged with argon for ten minutes, then the mixture was irradiated at 30-35 °C with 410 nm LEDs for 12 h. The solvent was removed under reduced pressure. Dibromomethane (0.2 mmol) was added. The mixture was analyzed by  $^1\text{H}$  NMR and GC-MS.

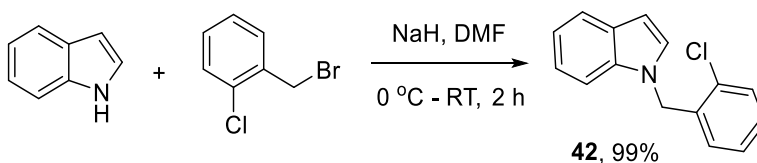

To a Schlenk tube (50 mL) charged with magnetic stirring bar, indole (234 mg, 2 mmol) was added. The Schlenk tube was evacuated and back-filled with argon three times. Anhydrous DMF (10 mL) was added and then cooled down to 0 °C with ice bath. Sodium hydride (60%, 96 mg, 2.4 mmol) was added. The mixture was stirred at 0 °C for 30 min. 2-chlorobenzyl bromide (45.0 mg, 2.2 mmol, 1.1 eq) was added in one portion. The mixture was stirred at room temperature for 1.5 h. TLC showed that the reaction was consumed completely. Water was added to quench the reaction and extracted with DCM (3 times). The combined organic layer was washed with brine, dried over Na<sub>2</sub>SO<sub>4</sub>. The solvent was removed under reduced pressure.



The residue was purified by flash column chromatography (PE:EA = 50:1) to give the product (48.0 mg, 99%) as a colorless oil.

### 1-(2-Chlorobenzyl)-1H-indole (42)<sup>8</sup>

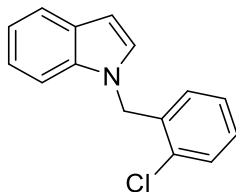

<sup>1</sup>H NMR (500 MHz, CDCl<sub>3</sub>) δ 7.71 (d, *J* = 7.7 Hz, 1 H), 7.44 (d, *J* = 8.0 Hz, 1 H), 7.29 (d, *J* = 7.7 Hz, 1 H), 7.26–7.19 (m, 2 H), 7.20–7.14 (m, 2 H), 7.11 (t, *J* = 7.5 Hz, 1 H), 6.81–6.54 (m, 2 H), 5.46 (s, 2 H) ppm. <sup>13</sup>C NMR (126 MHz, CDCl<sub>3</sub>) δ 136.29, 135.16, 132.38, 129.50, 128.81, 128.67, 128.40, 127.98, 127.23, 121.91, 121.07, 119.73, 109.64, 102.06, 47.68 ppm.

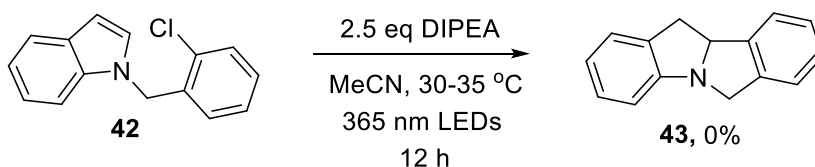

In a 10 mL test tube with a magnetic stirring bar, indole derivative (0.2 mmol) and DIPEA (87 μL, 2.5 equiv) were dissolved in MeCN (2.0 mL). The test tube was sealed with a septum. The mixture was purged with argon for ten minutes, then the mixture was irradiated at 30–35 °C with 365 nm LEDs for 12 h. The solvent was removed under reduced pressure. Then the mixture was detected by <sup>1</sup>H NMR and GC-MS. Substrate was recovered completely.

### Isotope labelling experiments

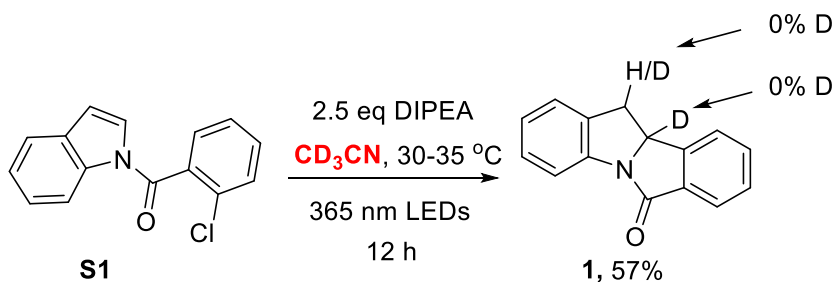

In a 10 mL test tube with a magnetic stirring bar, indole derivative (0.2 mmol) and DIPEA (87 μL, 2.5 equiv) were dissolved in CD<sub>3</sub>CN (2.0 mL). The test tube was sealed with a septum. The mixture was purged with argon for ten minutes, then the mixture was irradiated at 30–35 °C with 365 nm LEDs for 12 h. The solvent was removed under reduced pressure. The residue was purified by flash column chromatography (PE:EA = 10:1) to give the product in 57% yield.

# <sup>1</sup>H NMR of 1

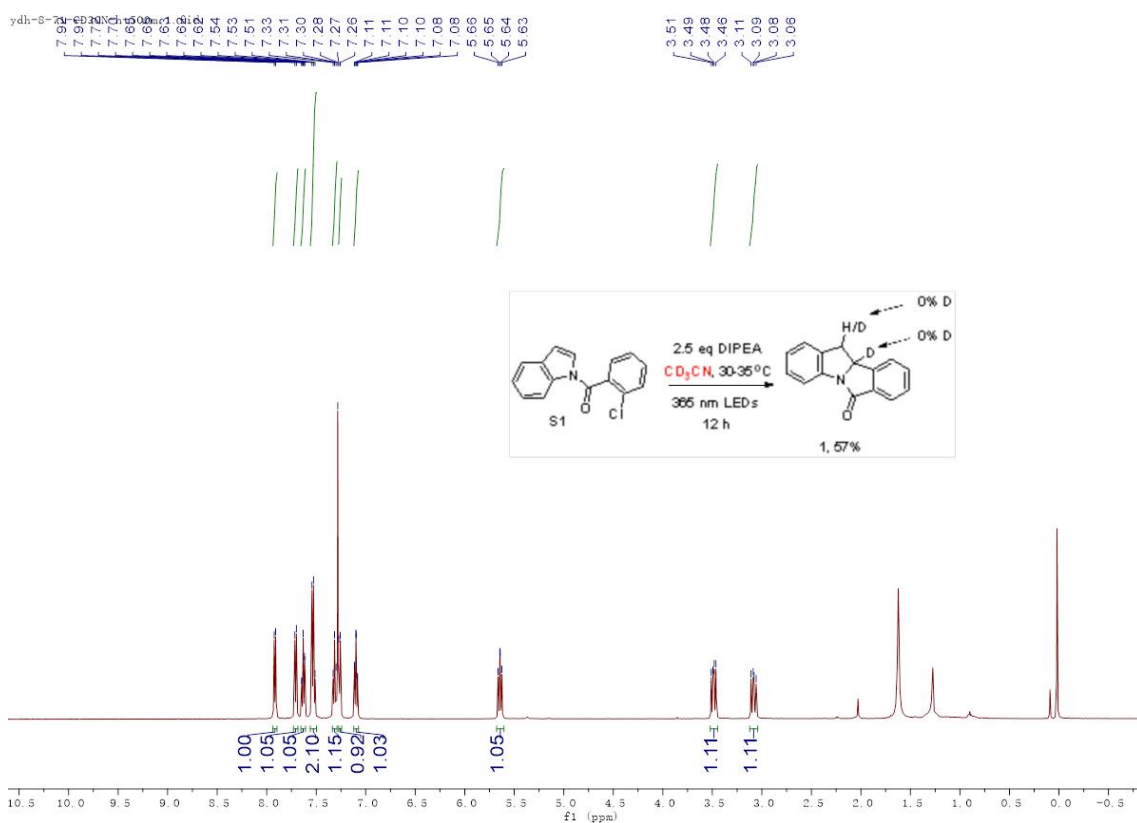

# <sup>13</sup>C NMR

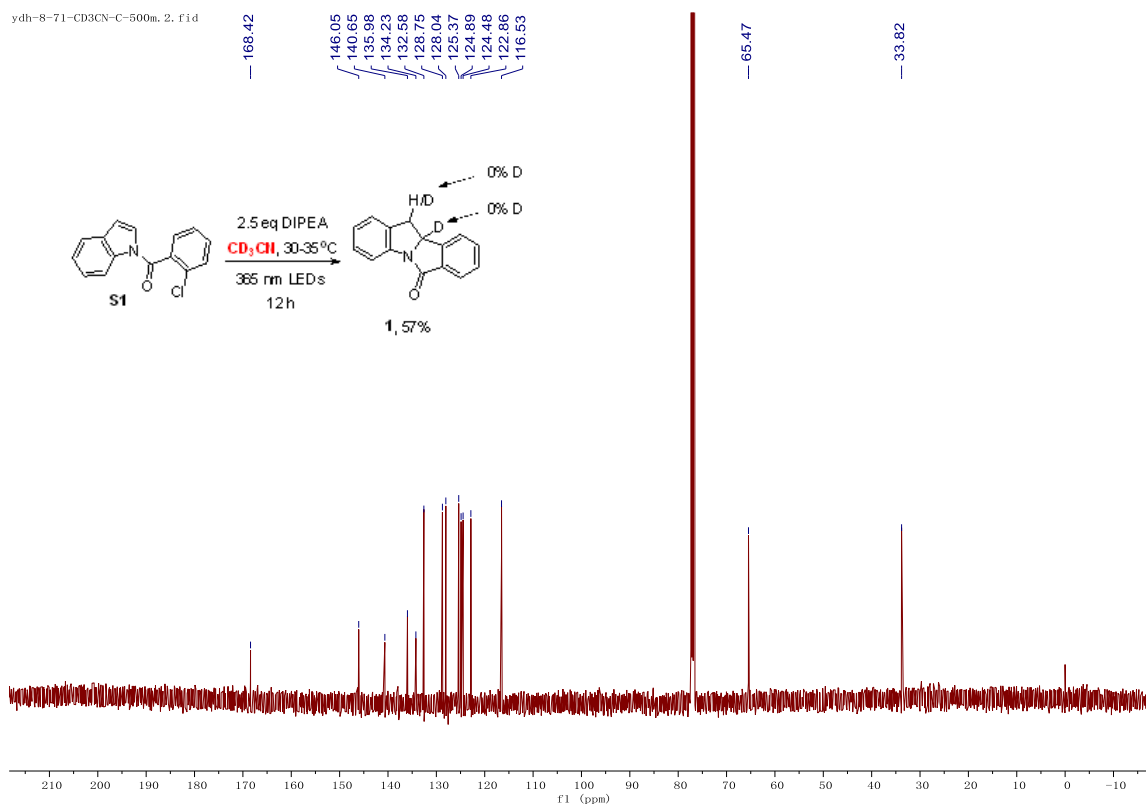

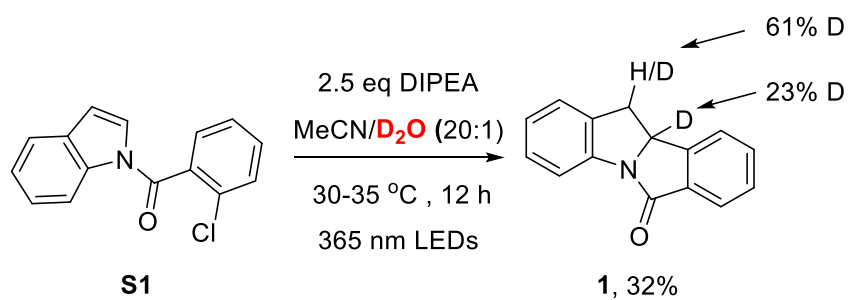

In a 10 mL test tube with a magnetic stirring bar, indole derivative (0.2 mmol) and DIPEA (87  $\mu\text{L}$ , 2.5 equiv) were dissolved in  $\text{CH}_3\text{CN/D}_2\text{O}$  (v/v, 2.0/0.10 mL). The test tube was sealed with a septum. The mixture was purged with argon for ten minutes, then the mixture was irradiated at 30-35  $^\circ\text{C}$  with 365 nm LEDs for 12 h. The solvent was removed under reduced pressure. The residue was purified by flash column chromatography (PE:EA = 10:1) to give the product in 32% yield.

# <sup>1</sup>H NMR of 1

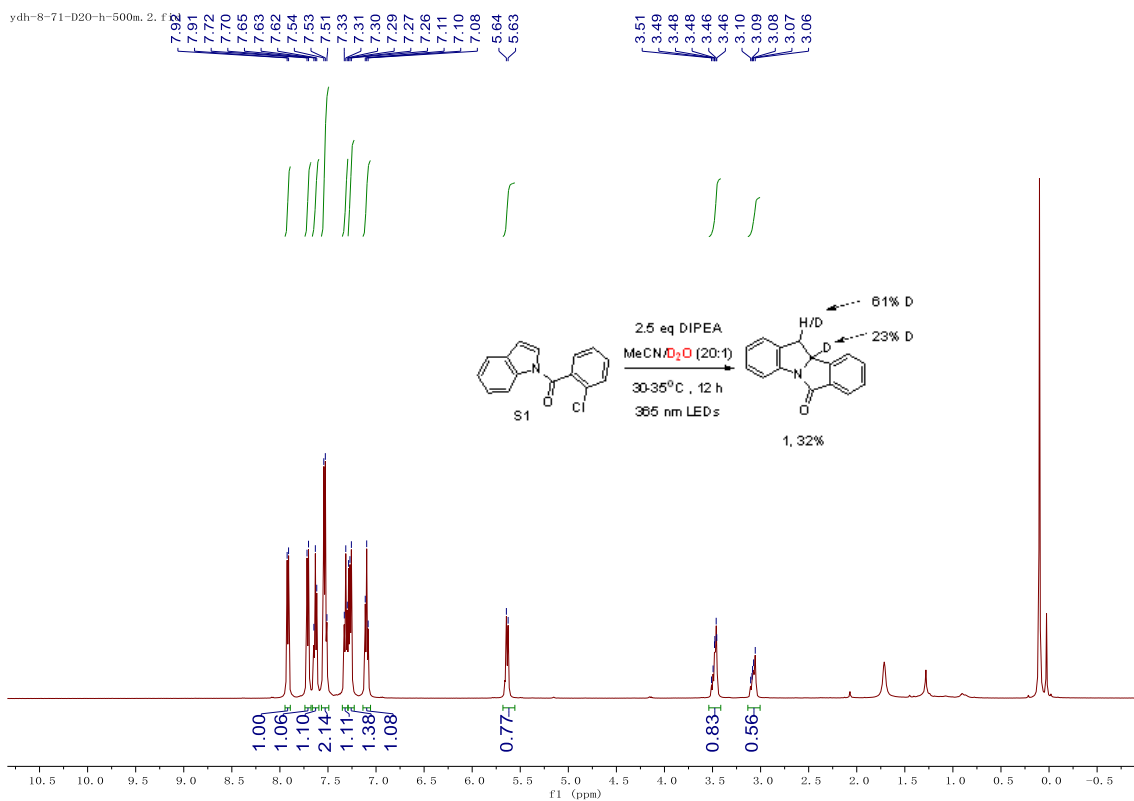

# <sup>13</sup>C NMR

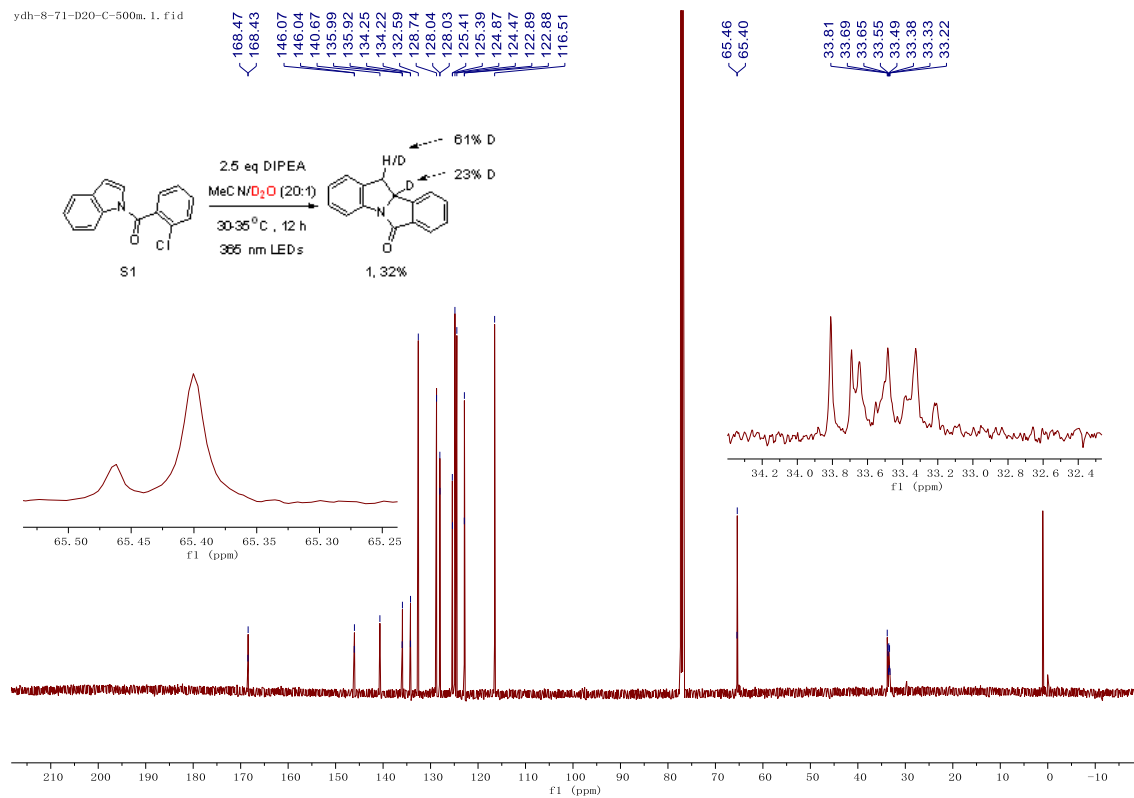

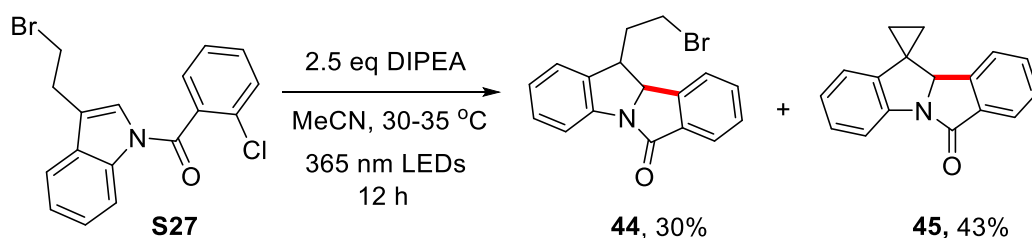

In a 10 mL test tube with a magnetic stirring bar, indole derivative **S27** (0.5 mmol), DIPEA (0.20 mL, 2.5 equiv) were dissolved in MeCN (5.0 mL). The test tube was screwed with a stopper. The mixture was purged with argon for ten minutes, then the mixture was irradiated at 30-35 °C with 365 nm LEDs for 12 h. The solvent was removed under reduced pressure. The residue was purified by flash column chromatography (PE:EA = 10:1) to give the as a colorless oil product **44** and **45** as a mixture.

**11-(2-Bromoethyl)-10b,11-dihydro-6H-isoindolo[2,1-a]indol-6-one (**44**) and spiro [cyclopropane-1,11'-isoindolo[2,1-a]indol]-6'(10b'H)-one (**45**)**

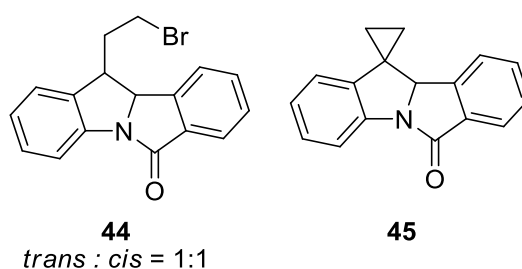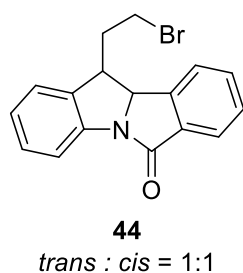

$^1\text{H NMR}$  (500 MHz,  $\text{CDCl}_3$ )  $\delta$  7.90 (d, 1 H), 7.75 (d,  $J = 7.8$  Hz, 1 H), 7.66 – 7.61 (m, 3 H), 7.61 – 7.56 (m, 2 H), 7.53 (t,  $J = 7.3$  Hz, 2 H), 7.35 (td,  $J = 7.7, 1.3$  Hz, 2 H), 7.28 (d,  $J = 8.9$  Hz, 3 H), 7.13 (td,  $J = 5.6, 2.8$  Hz, 2 H), 5.55 (d,  $J = 7.8$  Hz, 1 H), 5.27 (d,  $J = 9.3$  Hz, 1 H), 3.43 (m, 1 H), 3.34 (td,  $J = 8.6, 4.7$  Hz, 1 H), 2.27 (m, 1 H), 2.01 (dt,  $J = 14.6, 7.5$  Hz, 1 H), 1.55 – 1.47 (m, 2 H), 1.01 – 0.91 (m, 2 H), 0.66 – 0.59 (m, 2 H);  $^{13}\text{C NMR}$  (126 MHz,  $\text{CDCl}_3$ )  $\delta$  168.52, 167.45, 145.93, 142.99, 140.93, 139.65, 139.41, 139.30, 135.35, 134.18, 132.58, 132.01, 128.72, 128.65, 128.26, 128.00, 126.05, 124.91, 124.73, 124.52, 124.20, 124.06, 123.90, 123.01, 116.52, 116.37, 70.67, 69.21, 47.46, 44.31, 25.25, 24.78, 12.10, 10.39 ppm. HRMS (ESI) Calcd for  $[\text{C}_{17}\text{H}_{14}\text{BrNO}+\text{H}]^+$ : 328.0332, Found: 328.0328.

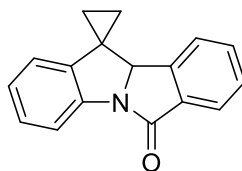

**45**

$^1\text{H}$  NMR (500 MHz,  $\text{CDCl}_3$ )  $\delta$  7.93 (d,  $J = 7.7$  Hz, 1 H), 7.72 (d,  $J = 7.9$  Hz, 1 H), 7.62 – 7.56 (m, 1 H), 7.53 (t,  $J = 7.3$  Hz, 1 H), 7.28 (d,  $J = 8.9$  Hz, 1 H), 7.22 (d,  $J = 7.4$  Hz, 1 H), 7.09 (d,  $J = 7.5$  Hz, 1 H), 6.77 (d,  $J = 7.5$  Hz, 1 H), 5.64 (s, 1 H), 1.34 (t,  $J = 7.6$  Hz, 2 H), 0.68 (t,  $J = 7.4$  Hz, 2 H);  $^{13}\text{C}$  NMR (126 MHz,  $\text{CDCl}_3$ )  $\delta$  169.19, 143.30, 141.12, 132.41, 128.98, 127.28, 125.19, 124.78, 122.30, 119.19, 116.28, 68.81, 27.27, 18.32, 10.80 ppm. HRMS (ESI) Calcd for  $[\text{C}_{17}\text{H}_{13}\text{NO}+\text{H}]^+$ : 248.1070, Found: 248.1067.

## Computational details

DFT/TDDFT calculations were performed using the Gaussian09 program package.<sup>18</sup> The real vibrational frequencies of these optimized structures were computed to confirm that all the optimized structures are potential energy minima. Hybrid functional PBE0<sup>19</sup> with dispersion corrections in revision three (D3BJ)<sup>20</sup> was employed. The 6-31G\* basis set<sup>21</sup> was used for all atoms. Unrestricted DFT calculations were performed to optimize the structures of molecules at triplet excited states of T<sub>1</sub>.

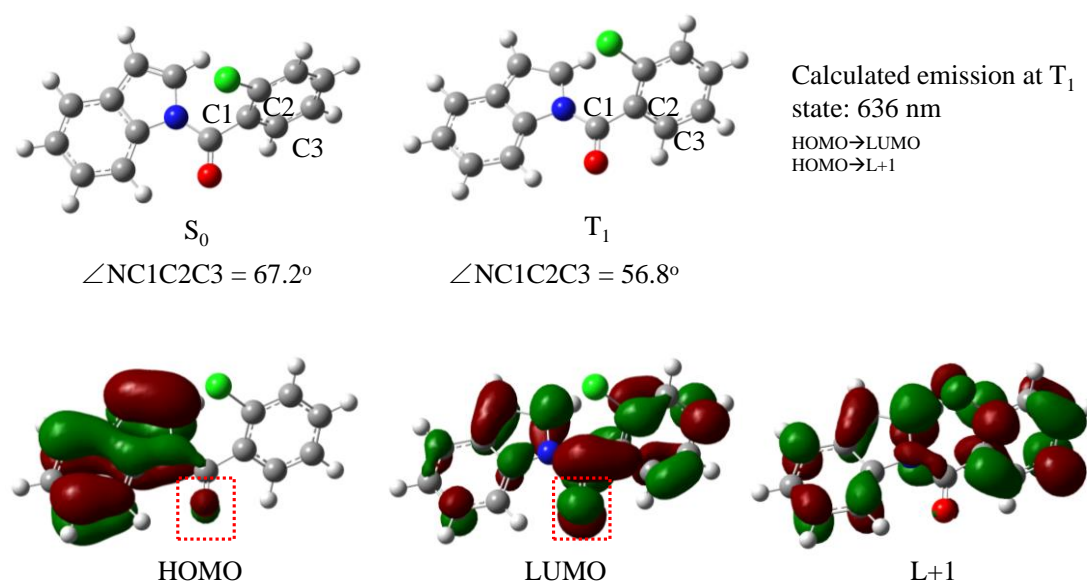

**Figure S15.** Calculated frontier molecular orbitals of **S1** at T<sub>1</sub> State

Table S2. Mulliken charge distribution of **S1** in the ground state (S<sub>0</sub>) and T<sub>1</sub> state.

|                | indole group | carbonyl group | 2-chlorobenzoyl |
|----------------|--------------|----------------|-----------------|
| S <sub>0</sub> | -0.04        | 0.05           | -0.01           |
| T <sub>1</sub> | 0.17         | -0.08          | -0.09           |

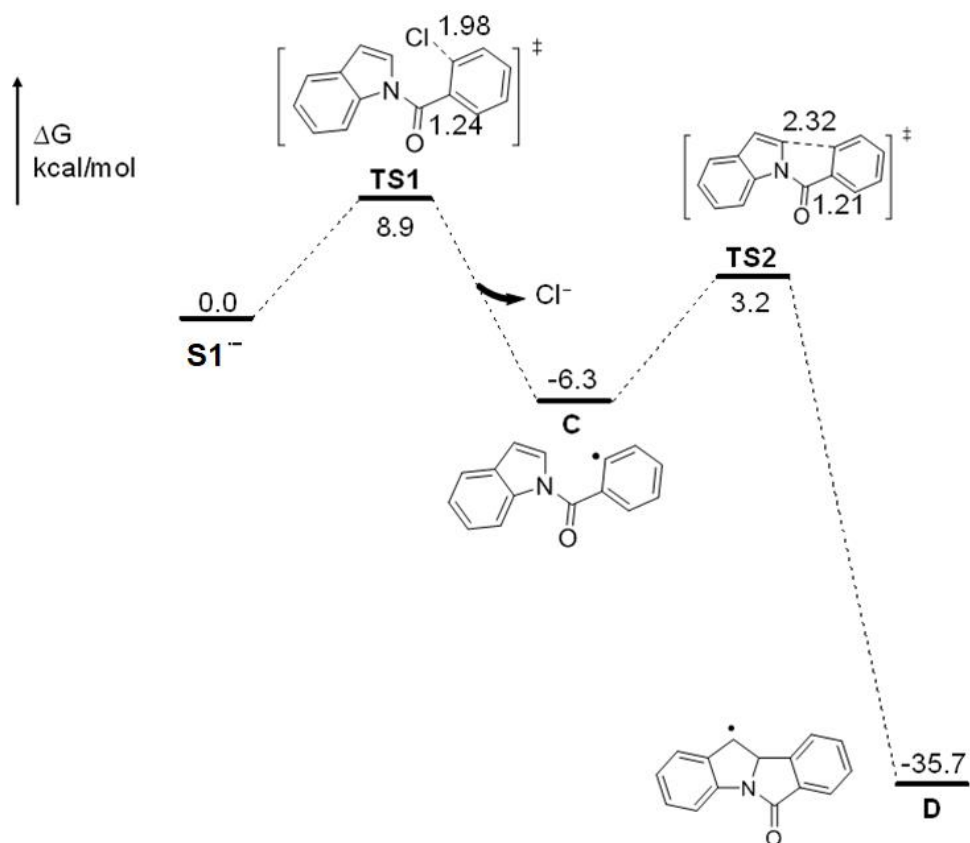

**Figure S16.** Energy profile for the proposed reaction pathway (in Scheme 2 in manuscript) calculated at the M06-2X-D3/6-311++G\*\*/PCM//B3LYP-D3/6-311G\*/PCM level of theory. Critical bond lengths are given in Å.



**Calculated coordinates:****S1, S<sub>0</sub>**

|    |             |             |             |
|----|-------------|-------------|-------------|
| C  | 2.65052200  | -0.72671900 | -0.79063200 |
| C  | 2.01128400  | 0.28735500  | -0.04445700 |
| C  | 2.71843600  | 1.17664800  | 0.75998900  |
| C  | 4.09968800  | 1.02642600  | 0.80460400  |
| C  | 4.75428500  | 0.02728100  | 0.07166300  |
| C  | 4.04027100  | -0.85319100 | -0.72848300 |
| C  | 1.62305000  | -1.44894500 | -1.49752300 |
| C  | 0.43374600  | -0.89063500 | -1.17306500 |
| H  | 2.20730400  | 1.95045700  | 1.31684000  |
| H  | 4.68280900  | 1.70385100  | 1.42194500  |
| H  | 4.54831600  | -1.62824800 | -1.29570000 |
| H  | 1.76682100  | -2.28342100 | -2.17024700 |
| H  | -0.56554700 | -1.13439600 | -1.50048200 |
| N  | 0.63476300  | 0.17153600  | -0.28376700 |
| C  | -0.34845400 | 0.98991600  | 0.24684900  |
| C  | -1.76955700 | 0.60519000  | -0.04318500 |
| C  | -2.38005300 | -0.54755000 | 0.45814100  |
| C  | -2.54315000 | 1.50586700  | -0.77891900 |
| C  | -3.72246700 | -0.81276700 | 0.20387600  |
| C  | -3.87985200 | 1.24419600  | -1.04784200 |
| H  | -2.07450500 | 2.41830200  | -1.13533500 |
| C  | -4.46682200 | 0.08064000  | -0.55758200 |
| H  | -4.17392200 | -1.71087500 | 0.61201300  |
| H  | -4.46367600 | 1.94928600  | -1.63134500 |
| H  | -5.51316300 | -0.13144800 | -0.75683200 |
| Cl | -1.48804300 | -1.65970000 | 1.45117100  |
| O  | -0.09029500 | 1.99441000  | 0.87790400  |
| H  | 5.83574700  | -0.05690200 | 0.13177800  |

**S1, T<sub>1</sub>**

|    |             |             |             |
|----|-------------|-------------|-------------|
| C  | 2.69388100  | -0.79317000 | -0.69524200 |
| C  | 2.00413400  | 0.30085100  | -0.05131600 |
| C  | 2.66568900  | 1.27824000  | 0.63722000  |
| C  | 4.07994200  | 1.17421100  | 0.72414100  |
| C  | 4.78140300  | 0.11975700  | 0.11875900  |
| C  | 4.11833300  | -0.86205200 | -0.59018800 |
| C  | 1.76194100  | -1.59342600 | -1.30526900 |
| C  | 0.43268100  | -1.00155200 | -1.05395800 |
| H  | 2.12473000  | 2.09436300  | 1.09566300  |
| H  | 4.62475000  | 1.93231300  | 1.27784000  |
| H  | 4.65602600  | -1.67644300 | -1.06580100 |
| H  | 1.92904700  | -2.50578900 | -1.86146500 |
| H  | -0.50755300 | -1.20307100 | -1.54237200 |
| N  | 0.60766500  | 0.12778600  | -0.27858800 |
| C  | -0.36412400 | 0.99730900  | 0.18330400  |
| C  | -1.78486300 | 0.60880500  | -0.04079200 |
| C  | -2.38470700 | -0.58126900 | 0.39203600  |
| C  | -2.60601800 | 1.56673700  | -0.65099600 |
| C  | -3.73731000 | -0.82934400 | 0.17648700  |
| C  | -3.95316500 | 1.32836600  | -0.87517400 |
| H  | -2.15076100 | 2.50862900  | -0.94125800 |
| C  | -4.51911600 | 0.12183300  | -0.46760300 |
| H  | -4.16915600 | -1.75901200 | 0.53229100  |
| H  | -4.56333800 | 2.08276100  | -1.36272500 |
| H  | -5.57384100 | -0.07625000 | -0.63450800 |
| Cl | -1.47465600 | -1.76840000 | 1.28163200  |
| O  | -0.06872600 | 2.08481400  | 0.68096000  |
| H  | 5.86318900  | 0.08050900  | 0.20857500  |

[S1]<sup>-1</sup>

|   |            |             |             |
|---|------------|-------------|-------------|
| C | 2.69540700 | -0.72187300 | -0.64993100 |
|---|------------|-------------|-------------|

|    |             |             |             |
|----|-------------|-------------|-------------|
| C  | 1.93262400  | 0.32951200  | -0.06833100 |
| C  | 2.50974000  | 1.28596800  | 0.76904900  |
| C  | 3.86594500  | 1.17343000  | 1.03578100  |
| C  | 4.63846100  | 0.13696900  | 0.47847400  |
| C  | 4.06545300  | -0.80510000 | -0.36129200 |
| C  | 1.79071500  | -1.48740300 | -1.44962200 |
| C  | 0.55923100  | -0.90240500 | -1.31801800 |
| H  | 1.90259800  | 2.09324400  | 1.16123100  |
| H  | 4.34343900  | 1.90520600  | 1.68376500  |
| H  | 4.66873900  | -1.60226400 | -0.79196200 |
| H  | 2.02145400  | -2.36107000 | -2.04525100 |
| H  | -0.38971000 | -1.16542200 | -1.76383700 |
| N  | 0.62312000  | 0.18256900  | -0.47563000 |
| C  | -0.44200900 | 1.12183200  | -0.21214800 |
| C  | -1.77550300 | 0.61981900  | -0.07847000 |
| C  | -2.23940600 | -0.67452200 | 0.33074400  |
| C  | -2.82665900 | 1.56108800  | -0.34328400 |
| C  | -3.58012300 | -1.01633900 | 0.33423300  |
| C  | -4.15659800 | 1.21827500  | -0.34378700 |
| H  | -2.50529200 | 2.57150400  | -0.57670000 |
| C  | -4.56495500 | -0.09493300 | -0.03577700 |
| H  | -3.85689700 | -2.01296000 | 0.66942500  |
| H  | -4.90175900 | 1.97485000  | -0.58585100 |
| H  | -5.61290900 | -0.38102500 | -0.04169600 |
| Cl | -1.14546600 | -1.85439500 | 1.05094300  |
| O  | -0.13667100 | 2.33485000  | -0.18481900 |
| H  | 5.70086200  | 0.07996600  | 0.70707800  |

**S1<sup>-</sup>**

|   |              |              |              |
|---|--------------|--------------|--------------|
| C | -1.465206000 | 0.085411000  | -7.709592000 |
| C | -1.917036000 | -0.688469000 | -6.627361000 |
| C | -2.290460000 | -0.034673000 | -5.417636000 |
| C | -2.223881000 | 1.355505000  | -5.278092000 |
| C | -1.771195000 | 2.093463000  | -6.364835000 |
| C | -1.394634000 | 1.465185000  | -7.570540000 |
| C | -2.110001000 | -2.094503000 | -6.412007000 |
| C | -2.564605000 | -2.239675000 | -5.128287000 |
| N | -2.668664000 | -1.007094000 | -4.506760000 |
| H | -1.173257000 | -0.391573000 | -8.640770000 |
| H | -2.536601000 | 1.830162000  | -4.356693000 |
| H | -1.709552000 | 3.174437000  | -6.285790000 |
| H | -1.047161000 | 2.072861000  | -8.400469000 |
| H | -1.935665000 | -2.892602000 | -7.119519000 |
| H | -2.824533000 | -3.131771000 | -4.579387000 |
| C | -3.227282000 | -0.759509000 | -3.192626000 |
| O | -4.109389000 | 0.137000000  | -3.106697000 |
| C | -2.802927000 | -1.588787000 | -2.105071000 |
| C | -1.576825000 | -2.321698000 | -1.948488000 |
| C | -3.692722000 | -1.690166000 | -0.977048000 |
| C | -1.330207000 | -3.147736000 | -0.865703000 |
| C | -3.447792000 | -2.514603000 | 0.098148000  |
| C | -2.271461000 | -3.287620000 | 0.162461000  |
| H | -4.601244000 | -1.100619000 | -1.021510000 |

|    |              |              |              |
|----|--------------|--------------|--------------|
| H  | -0.377768000 | -3.663797000 | -0.803977000 |
| H  | -4.175091000 | -2.568812000 | 0.903729000  |
| H  | -2.073786000 | -3.948342000 | 0.998918000  |
| Cl | -0.186655000 | -2.049293000 | -3.042267000 |

**TS1**

|   |              |              |              |
|---|--------------|--------------|--------------|
| C | -1.506953000 | 0.068889000  | -7.734177000 |
| C | -1.860898000 | -0.668273000 | -6.594414000 |
| C | -2.273141000 | 0.016874000  | -5.418494000 |
| C | -2.331634000 | 1.413131000  | -5.367356000 |
| C | -1.973358000 | 2.118421000  | -6.511373000 |
| C | -1.566512000 | 1.455788000  | -7.685110000 |
| C | -1.904181000 | -2.074655000 | -6.295544000 |
| C | -2.304904000 | -2.198149000 | -4.999162000 |
| N | -2.529831000 | -0.942868000 | -4.439205000 |
| H | -1.188464000 | -0.440631000 | -8.638607000 |
| H | -2.660447000 | 1.918869000  | -4.470426000 |
| H | -2.012115000 | 3.203089000  | -6.497838000 |
| H | -1.296898000 | 2.038564000  | -8.560337000 |
| H | -1.666416000 | -2.888361000 | -6.965582000 |
| H | -2.451026000 | -3.080299000 | -4.398408000 |
| C | -3.086540000 | -0.679183000 | -3.141901000 |
| O | -3.805428000 | 0.322752000  | -3.018399000 |
| C | -2.757910000 | -1.582609000 | -2.060722000 |
| C | -1.660597000 | -2.497332000 | -2.034386000 |
| C | -3.609250000 | -1.567315000 | -0.912433000 |

|    |              |              |              |
|----|--------------|--------------|--------------|
| C  | -1.499239000 | -3.397688000 | -0.972188000 |
| C  | -3.478877000 | -2.493397000 | 0.094844000  |
| C  | -2.436179000 | -3.457530000 | 0.044300000  |
| H  | -4.389890000 | -0.814347000 | -0.873058000 |
| H  | -0.632517000 | -4.053115000 | -0.958343000 |
| H  | -4.165586000 | -2.483510000 | 0.935539000  |
| H  | -2.361878000 | -4.224186000 | 0.809934000  |
| Cl | 0.089796000  | -1.878797000 | -2.731538000 |

**TS1'**

|   |              |              |              |
|---|--------------|--------------|--------------|
| C | -1.425247000 | 0.102374000  | -7.724727000 |
| C | -1.826047000 | -0.658845000 | -6.602546000 |
| C | -2.309629000 | -0.000359000 | -5.433347000 |
| C | -2.396020000 | 1.366988000  | -5.350597000 |
| C | -1.985510000 | 2.105209000  | -6.486107000 |
| C | -1.511885000 | 1.486306000  | -7.649508000 |
| C | -1.849152000 | -2.036010000 | -6.344096000 |
| C | -2.336338000 | -2.197852000 | -5.016727000 |
| N | -2.606504000 | -1.007582000 | -4.476229000 |
| H | -1.057658000 | -0.391955000 | -8.615964000 |
| H | -2.770830000 | 1.861973000  | -4.467060000 |
| H | -2.044315000 | 3.186546000  | -6.445866000 |
| H | -1.211936000 | 2.094724000  | -8.493799000 |
| H | -1.556791000 | -2.842398000 | -6.999257000 |
| H | -2.493675000 | -3.109346000 | -4.463561000 |
| C | -3.191627000 | -0.744618000 | -3.148863000 |

|    |              |              |              |
|----|--------------|--------------|--------------|
| O  | -3.934275000 | 0.229648000  | -3.084569000 |
| C  | -2.810983000 | -1.617026000 | -2.070063000 |
| C  | -1.777075000 | -2.590632000 | -2.108922000 |
| C  | -3.564506000 | -1.503585000 | -0.859431000 |
| C  | -1.554219000 | -3.445328000 | -1.022835000 |
| C  | -3.378311000 | -2.386225000 | 0.175889000  |
| C  | -2.390099000 | -3.398100000 | 0.078332000  |
| H  | -4.303043000 | -0.712239000 | -0.789170000 |
| H  | -0.731968000 | -4.153232000 | -1.060155000 |
| H  | -3.980555000 | -2.304892000 | 1.074467000  |
| H  | -2.276736000 | -4.125140000 | 0.876649000  |
| Cl | 0.031951000  | -2.077220000 | -3.002174000 |

**TS1''**

|   |              |              |              |
|---|--------------|--------------|--------------|
| C | -1.034833000 | -0.142066000 | -7.260747000 |
| C | -1.764485000 | -0.769425000 | -6.231969000 |
| C | -2.552931000 | 0.023095000  | -5.351209000 |
| C | -2.626942000 | 1.395822000  | -5.456214000 |
| C | -1.888561000 | 1.995821000  | -6.490805000 |
| C | -1.107709000 | 1.239944000  | -7.378235000 |
| C | -1.900841000 | -2.117965000 | -5.832731000 |
| C | -2.749767000 | -2.148275000 | -4.706242000 |
| N | -3.154521000 | -0.849649000 | -4.418789000 |
| H | -0.428253000 | -0.731529000 | -7.938442000 |
| H | -3.232235000 | 1.981024000  | -4.778115000 |
| H | -1.930725000 | 3.073013000  | -6.604854000 |

|          |              |              |              |
|----------|--------------|--------------|--------------|
| H        | -0.558026000 | 1.743963000  | -8.164598000 |
| H        | -1.482445000 | -2.989045000 | -6.313588000 |
| H        | -3.355611000 | -2.985946000 | -4.402003000 |
| C        | -3.526914000 | -0.468657000 | -3.101616000 |
| O        | -4.092155000 | 0.574744000  | -2.862829000 |
| C        | -3.060187000 | -1.469327000 | -2.120315000 |
| C        | -2.065455000 | -2.368828000 | -2.527796000 |
| C        | -3.575792000 | -1.546920000 | -0.825900000 |
| C        | -1.618216000 | -3.394491000 | -1.697112000 |
| C        | -3.123150000 | -2.557817000 | 0.020706000  |
| C        | -2.160352000 | -3.483609000 | -0.417562000 |
| H        | -4.342361000 | -0.848565000 | -0.507801000 |
| H        | -0.845566000 | -4.081841000 | -2.022793000 |
| H        | -3.528788000 | -2.642040000 | 1.022303000  |
| H        | -1.826129000 | -4.266224000 | 0.255704000  |
| Cl       | 0.027346000  | -1.072524000 | -3.184315000 |
| <b>C</b> |              |              |              |
| C        | -1.531902000 | 0.054597000  | -7.743294000 |
| C        | -1.864882000 | -0.641637000 | -6.575641000 |
| C        | -2.268946000 | 0.073561000  | -5.422204000 |
| C        | -2.341796000 | 1.467208000  | -5.411324000 |
| C        | -2.003589000 | 2.136850000  | -6.584957000 |
| C        | -1.605084000 | 1.442397000  | -7.738772000 |
| C        | -1.894534000 | -2.044938000 | -6.243456000 |
| C        | -2.282585000 | -2.154141000 | -4.950187000 |



|   |              |              |              |
|---|--------------|--------------|--------------|
| N | -2.509699000 | -0.874251000 | -4.405243000 |
| H | -1.221124000 | -0.483944000 | -8.632461000 |
| H | -2.658754000 | 2.004159000  | -4.530203000 |
| H | -2.054705000 | 3.220332000  | -6.605187000 |
| H | -1.352100000 | 1.998318000  | -8.635525000 |
| H | -1.670396000 | -2.869104000 | -6.904567000 |
| H | -2.464924000 | -3.035608000 | -4.360441000 |
| C | -2.950659000 | -0.570302000 | -3.113176000 |
| O | -3.401651000 | 0.529825000  | -2.848067000 |
| C | -2.827782000 | -1.625522000 | -2.061668000 |
| C | -1.884806000 | -2.632049000 | -2.045596000 |
| C | -3.666415000 | -1.545378000 | -0.931832000 |
| C | -1.702825000 | -3.556960000 | -1.048574000 |
| C | -3.538195000 | -2.463115000 | 0.104600000  |
| C | -2.564083000 | -3.464569000 | 0.054938000  |
| H | -4.407759000 | -0.755026000 | -0.890801000 |
| H | -0.935557000 | -4.322174000 | -1.097405000 |
| H | -4.198762000 | -2.397952000 | 0.961834000  |
| H | -2.466638000 | -4.173195000 | 0.871034000  |

**TS2**

|   |              |              |              |
|---|--------------|--------------|--------------|
| C | -1.171967000 | 0.099112000  | -7.541839000 |
| C | -1.789807000 | -0.663297000 | -6.538275000 |
| C | -2.495755000 | -0.003314000 | -5.498317000 |
| C | -2.572614000 | 1.384011000  | -5.419407000 |
| C | -1.946219000 | 2.116535000  | -6.426249000 |

|          |              |              |              |
|----------|--------------|--------------|--------------|
| C        | -1.258724000 | 1.483397000  | -7.477364000 |
| C        | -1.893820000 | -2.071648000 | -6.299195000 |
| C        | -2.601246000 | -2.254785000 | -5.127810000 |
| N        | -2.998976000 | -0.988600000 | -4.630584000 |
| H        | -0.635746000 | -0.388903000 | -8.348765000 |
| H        | -3.111595000 | 1.866267000  | -4.615541000 |
| H        | -1.999576000 | 3.199650000  | -6.401359000 |
| H        | -0.790844000 | 2.088423000  | -8.246632000 |
| H        | -1.550078000 | -2.862662000 | -6.949475000 |
| H        | -3.167568000 | -3.131322000 | -4.856557000 |
| C        | -3.192490000 | -0.761570000 | -3.250520000 |
| O        | -3.721005000 | 0.246637000  | -2.826589000 |
| C        | -2.588179000 | -1.828805000 | -2.419870000 |
| C        | -1.764948000 | -2.760836000 | -3.026462000 |
| C        | -2.752969000 | -1.877609000 | -1.027023000 |
| C        | -1.119337000 | -3.768426000 | -2.344684000 |
| C        | -2.100987000 | -2.869549000 | -0.302598000 |
| C        | -1.289137000 | -3.807432000 | -0.952654000 |
| H        | -3.385874000 | -1.143898000 | -0.538728000 |
| H        | -0.492834000 | -4.499307000 | -2.845721000 |
| H        | -2.223098000 | -2.920682000 | 0.773568000  |
| H        | -0.782565000 | -4.573880000 | -0.374115000 |
| <b>D</b> |              |              |              |
| C        | -1.072327000 | 0.287579000  | -7.570997000 |
| C        | -1.635480000 | -0.531721000 | -6.565962000 |

|   |              |              |              |
|---|--------------|--------------|--------------|
| C | -2.546397000 | 0.060262000  | -5.631302000 |
| C | -2.874199000 | 1.400808000  | -5.664419000 |
| C | -2.292228000 | 2.190739000  | -6.669198000 |
| C | -1.409020000 | 1.634786000  | -7.608793000 |
| C | -1.466431000 | -1.888167000 | -6.250545000 |
| C | -2.416051000 | -2.241278000 | -5.139095000 |
| N | -2.946439000 | -0.923959000 | -4.708853000 |
| H | -0.384211000 | -0.135110000 | -8.295095000 |
| H | -3.551221000 | 1.822132000  | -4.932896000 |
| H | -2.534533000 | 3.246434000  | -6.721011000 |
| H | -0.983117000 | 2.271111000  | -8.377473000 |
| H | -0.879667000 | -2.614935000 | -6.793500000 |
| H | -3.245732000 | -2.844501000 | -5.542149000 |
| C | -2.893566000 | -0.760426000 | -3.319557000 |
| O | -3.196185000 | 0.254861000  | -2.720272000 |
| C | -2.336578000 | -2.025220000 | -2.783754000 |
| C | -1.970210000 | -2.866023000 | -3.836570000 |
| C | -2.099950000 | -2.370549000 | -1.456332000 |
| C | -1.370008000 | -4.091977000 | -3.584571000 |
| C | -1.484752000 | -3.593606000 | -1.199599000 |
| C | -1.122177000 | -4.441856000 | -2.254446000 |
| H | -2.385850000 | -1.699387000 | -0.653809000 |
| H | -1.090428000 | -4.759209000 | -4.392732000 |
| H | -1.282843000 | -3.894269000 | -0.177432000 |
| H | -0.639492000 | -5.387972000 | -2.033808000 |

## X-ray crystallographic details of compound 37

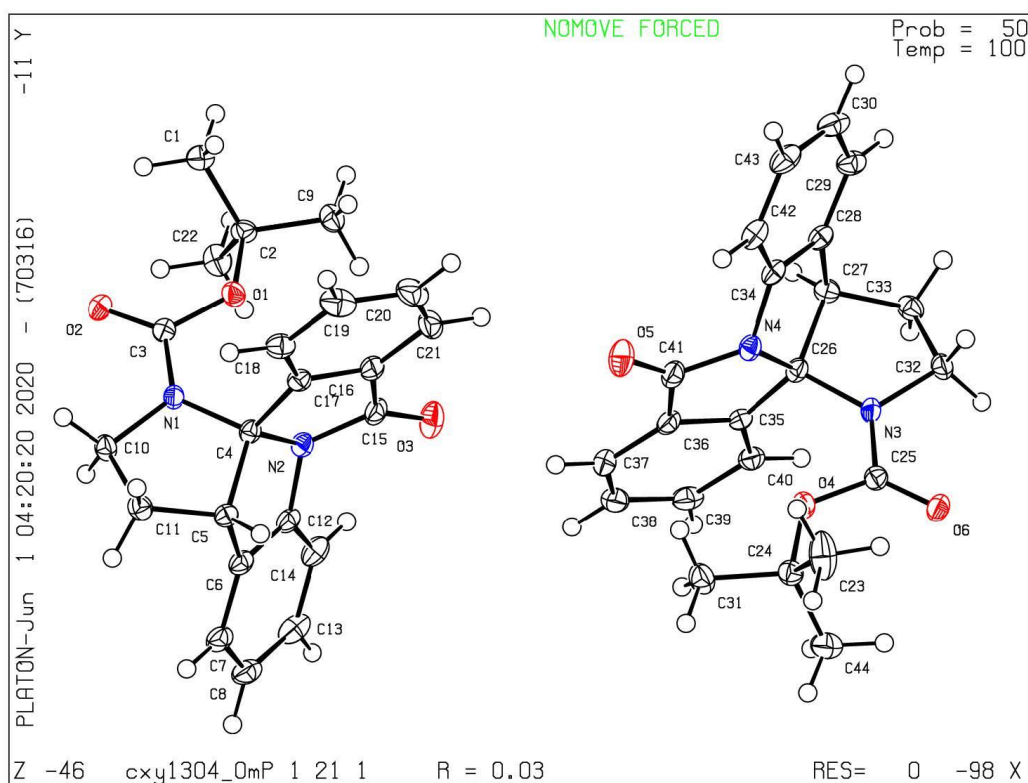

**cxy1304\_0m** (CCDC number 2101131)

**Table S3 Crystal data and structure refinement for cxy1304\_0m.**

|                                    |                                                               |
|------------------------------------|---------------------------------------------------------------|
| Identification code                | cxy1304_0m                                                    |
| Empirical formula                  | C <sub>22</sub> H <sub>22</sub> N <sub>2</sub> O <sub>3</sub> |
| Formula weight                     | 362.41                                                        |
| Temperature/K                      | 100.0                                                         |
| Crystal system                     | monoclinic                                                    |
| Space group                        | P2 <sub>1</sub>                                               |
| a/Å                                | 9.6179(7)                                                     |
| b/Å                                | 15.5833(12)                                                   |
| c/Å                                | 12.4610(9)                                                    |
| α/°                                | 90                                                            |
| β/°                                | 93.679(3)                                                     |
| γ/°                                | 90                                                            |
| Volume/Å <sup>3</sup>              | 1863.8(2)                                                     |
| Z                                  | 4                                                             |
| ρ <sub>calc</sub> /cm <sup>3</sup> | 1.292                                                         |
| μ/mm <sup>-1</sup>                 | 0.087                                                         |
| F(000)                             | 768.0                                                         |
| Crystal size/mm <sup>3</sup>       | 0.34 × 0.32 × 0.29                                            |
| Radiation                          | MoKα (λ = 0.71073)                                            |
| 2θ range for data collection/°     | 4.984 to 55.086                                               |

|                                             |                                                               |
|---------------------------------------------|---------------------------------------------------------------|
| Index ranges                                | -12 ≤ h ≤ 12, -20 ≤ k ≤ 20, -16 ≤ l ≤ 16                      |
| Reflections collected                       | 44261                                                         |
| Independent reflections                     | 8583 [R <sub>int</sub> = 0.0475, R <sub>sigma</sub> = 0.0345] |
| Data/restraints/parameters                  | 8583/1/494                                                    |
| Goodness-of-fit on F <sup>2</sup>           | 1.023                                                         |
| Final R indexes [I ≥ 2σ (I)]                | R <sub>1</sub> = 0.0344, wR <sub>2</sub> = 0.0786             |
| Final R indexes [all data]                  | R <sub>1</sub> = 0.0416, wR <sub>2</sub> = 0.0830             |
| Largest diff. peak/hole / e Å <sup>-3</sup> | 0.27/-0.18                                                    |
| Flack parameter                             | 0.4(3)                                                        |

**Table S4 Fractional Atomic Coordinates ( $\times 10^4$ ) and Equivalent Isotropic Displacement Parameters ( $\text{\AA}^2 \times 10^3$ ) for cxy1304\_0m.  $U_{\text{eq}}$  is defined as 1/3 of the trace of the orthogonalised  $U_{\text{H}}$  tensor.**

| Atom | x          | y          | z           | U(eq)   |
|------|------------|------------|-------------|---------|
| O1   | 1728.5(14) | 4098.4(9)  | -326.5(11)  | 19.3(3) |
| O2   | -96.5(15)  | 3621.0(9)  | -1427.9(11) | 20.0(3) |
| O3   | 2922.7(17) | 4266.8(11) | 2811.8(13)  | 29.4(4) |
| O4   | 6461.7(14) | 5970.7(10) | 7013.6(11)  | 22.0(3) |
| O5   | 5690.9(17) | 5924.6(11) | 3807.1(13)  | 30.4(4) |
| O6   | 8150.8(15) | 6340.6(10) | 8298.5(11)  | 20.9(3) |
| N1   | -425.2(17) | 4458.8(11) | 17.3(13)    | 15.5(3) |
| N2   | 845.2(17)  | 4280.6(11) | 1773.3(13)  | 16.7(3) |
| N3   | 8635.1(17) | 5567.3(11) | 6830.6(13)  | 17.3(4) |
| N4   | 7622.8(17) | 5808.5(11) | 4996.7(13)  | 17.7(4) |
| C1   | 3003(2)    | 3728.8(16) | -1901.9(17) | 25.1(5) |
| C2   | 2803(2)    | 3534.7(14) | -731.4(16)  | 17.7(4) |
| C3   | 379(2)     | 4014.3(12) | -644.7(15)  | 15.3(4) |
| C4   | 79(2)      | 4871.3(13) | 1029.3(15)  | 15.0(4) |
| C5   | -1303(2)   | 5058.2(13) | 1571.0(16)  | 16.7(4) |
| C6   | -1390(2)   | 4287.5(13) | 2308.9(16)  | 18.1(4) |
| C7   | -2483(2)   | 3997.8(14) | 2879.9(16)  | 21.6(4) |
| C8   | -2254(2)   | 3306.1(15) | 3581.9(17)  | 25.0(5) |
| C9   | 4087(2)    | 3794.8(15) | -31.4(18)   | 22.1(4) |
| C10  | -1951(2)   | 4451.8(14) | -163.2(16)  | 18.0(4) |
| C11  | -2407(2)   | 5117.5(13) | 635.9(17)   | 18.6(4) |
| C12  | -105(2)    | 3877.2(13) | 2435.6(16)  | 18.1(4) |
| C13  | -964(3)    | 2914.7(14) | 3702.7(18)  | 25.7(5) |
| C14  | 143(2)     | 3186.7(14) | 3121.0(17)  | 23.0(5) |
| C15  | 2140(2)    | 4599.3(14) | 2127.8(16)  | 21.0(4) |
| C16  | 2316(2)    | 5406.8(14) | 1534.6(17)  | 19.2(4) |
| C17  | 1113(2)    | 5579.7(13) | 899.1(16)   | 17.0(4) |
| C18  | 998(2)     | 6304.6(14) | 258.4(17)   | 21.4(4) |
| C19  | 2119(3)    | 6867.5(15) | 315(2)      | 28.5(5) |
| C20  | 3314(2)    | 6706.9(16) | 974(2)      | 29.9(5) |
| C21  | 3439(2)    | 5971.2(16) | 1591.6(18)  | 25.6(5) |
| C22  | 2424(2)    | 2600.2(14) | -556.1(19)  | 24.2(5) |
| C23  | 5641(3)    | 7390.3(16) | 7448(2)     | 39.0(7) |

|     |          |            |            |         |
|-----|----------|------------|------------|---------|
| C24 | 5322(2)  | 6443.5(14) | 7461.1(17) | 19.4(4) |
| C25 | 7766(2)  | 5996.1(14) | 7458.5(16) | 17.1(4) |
| C26 | 8224(2)  | 5180.7(13) | 5784.3(15) | 16.0(4) |
| C27 | 9654(2)  | 4937.9(14) | 5354.1(16) | 18.0(4) |
| C28 | 9932(2)  | 5702.1(13) | 4648.2(16) | 18.0(4) |
| C29 | 11140(2) | 5948.4(14) | 4189.5(17) | 21.8(4) |
| C30 | 11099(2) | 6664.4(15) | 3520.6(18) | 24.8(5) |
| C31 | 4096(2)  | 6230.9(15) | 6672.3(18) | 24.9(5) |
| C32 | 10137(2) | 5531.6(14) | 7117.5(17) | 18.9(4) |
| C33 | 10630(2) | 4838.5(14) | 6361.7(17) | 19.7(4) |
| C34 | 8713(2)  | 6174.8(13) | 4438.3(16) | 18.5(4) |
| C35 | 7090(2)  | 4515.5(14) | 5811.8(16) | 17.0(4) |
| C36 | 5990(2)  | 4746.0(14) | 5094.0(16) | 19.5(4) |
| C37 | 4816(2)  | 4234.8(15) | 4939.3(18) | 23.7(5) |
| C38 | 4780(2)  | 3480.7(16) | 5529.3(18) | 25.7(5) |
| C39 | 5873(2)  | 3258.5(15) | 6264.5(17) | 24.1(5) |
| C40 | 7044(2)  | 3780.6(14) | 6424.1(17) | 20.8(4) |
| C41 | 6335(2)  | 5553.7(14) | 4536.4(16) | 20.5(4) |
| C42 | 8652(2)  | 6880.2(14) | 3763.6(17) | 22.3(5) |
| C43 | 9878(3)  | 7116.7(14) | 3303.0(17) | 25.2(5) |
| C44 | 5078(3)  | 6107(2)    | 8571.2(19) | 40.2(7) |

**Table S5 Anisotropic Displacement Parameters ( $\text{\AA}^2 \times 10^3$ ) for cxy1304\_0m. The Anisotropic displacement factor exponent takes the form:  $-2\pi^2[h^2a^{*2}U_{11}+2hka^*b^*U_{12}+\dots]$ .**

| Atom | $U_{11}$ | $U_{22}$ | $U_{33}$ | $U_{23}$ | $U_{13}$ | $U_{12}$ |
|------|----------|----------|----------|----------|----------|----------|
| O1   | 14.9(7)  | 22.2(8)  | 20.7(7)  | -5.7(6)  | 1.0(6)   | 0.9(6)   |
| O2   | 21.8(7)  | 21.8(8)  | 16.3(7)  | -4.2(6)  | 0.1(6)   | -0.8(6)  |
| O3   | 29.2(8)  | 31.9(9)  | 25.4(8)  | -2.1(7)  | -10.9(7) | 5.3(7)   |
| O4   | 15.5(7)  | 28.9(8)  | 21.4(7)  | -9.1(7)  | -0.9(6)  | 2.7(6)   |
| O5   | 30.9(8)  | 33.3(9)  | 25.1(8)  | 4.4(7)   | -11.1(6) | 2.8(7)   |
| O6   | 22.0(7)  | 24.7(8)  | 15.7(7)  | -3.9(6)  | -1.9(6)  | 0.1(6)   |
| N1   | 14.1(8)  | 17.4(8)  | 14.8(8)  | -2.3(7)  | -1.3(6)  | 0.6(7)   |
| N2   | 17.6(8)  | 17.4(8)  | 14.9(8)  | 1.2(7)   | -0.3(6)  | 0.8(7)   |
| N3   | 14.3(8)  | 22.8(9)  | 14.5(8)  | -2.0(7)  | -2.5(6)  | 0.8(7)   |
| N4   | 18.9(8)  | 18.4(9)  | 15.3(8)  | 0.5(7)   | -2.0(6)  | 2.6(7)   |
| C1   | 21.6(11) | 34.0(13) | 20.1(11) | 1.8(9)   | 3.6(8)   | -1.5(10) |
| C2   | 16.2(9)  | 18.6(10) | 18.5(10) | -0.2(8)  | 3.0(8)   | 3.7(8)   |
| C3   | 17.6(9)  | 13.1(9)  | 15.2(10) | 1.2(8)   | 0.5(7)   | -1.4(8)  |
| C4   | 16.3(9)  | 14.1(9)  | 14.5(9)  | -1.7(7)  | -0.2(7)  | 1.3(8)   |
| C5   | 17.5(9)  | 16.6(10) | 16.2(9)  | -2.5(8)  | 1.7(7)   | 0.7(8)   |
| C6   | 23.2(10) | 16.5(10) | 14.8(9)  | -4.0(8)  | 2.0(8)   | -1.8(8)  |
| C7   | 26.7(11) | 21.1(10) | 17.3(10) | -6.1(8)  | 4.1(8)   | -3.6(9)  |
| C8   | 33.8(12) | 23.8(11) | 18.3(10) | -4.8(9)  | 7.8(9)   | -9.2(10) |
| C9   | 16.3(10) | 25.5(11) | 24.0(11) | -0.1(9)  | -1.3(8)  | 1.0(9)   |
| C10  | 14.5(9)  | 19.8(10) | 19.4(10) | -0.8(8)  | -2.1(7)  | 1.3(8)   |
| C11  | 16.2(9)  | 18.0(10) | 21.5(10) | -0.8(8)  | 0.6(8)   | 1.9(8)   |
| C12  | 23.8(10) | 17.1(10) | 13.4(9)  | -3.8(8)  | 1.2(8)   | -2.0(8)  |

|     |          |          |          |           |           |           |
|-----|----------|----------|----------|-----------|-----------|-----------|
| C13 | 43.3(14) | 16.4(10) | 17.5(10) | -0.2(8)   | 4.2(9)    | -4.3(10)  |
| C14 | 33.6(12) | 17.4(10) | 17.7(10) | -1.8(8)   | -0.1(9)   | 2.8(9)    |
| C15 | 21.2(10) | 26.0(11) | 15.4(10) | -7.4(8)   | -1.6(8)   | 2.1(9)    |
| C16 | 18.8(10) | 21.5(10) | 17.4(10) | -7.5(8)   | 1.9(8)    | 1.7(8)    |
| C17 | 17.6(9)  | 17.6(10) | 16.1(10) | -4.5(8)   | 3.5(7)    | 0.0(8)    |
| C18 | 23.7(10) | 18.5(10) | 22.5(10) | -1.4(9)   | 5.9(8)    | 1.2(9)    |
| C19 | 32.4(13) | 18.4(11) | 35.9(13) | -0.4(10)  | 10.9(10)  | -2.7(9)   |
| C20 | 26.3(12) | 27.3(12) | 37.0(13) | -10.3(10) | 9.9(10)   | -11.4(10) |
| C21 | 18.3(10) | 30.6(12) | 27.8(11) | -11.5(10) | 0.9(8)    | -4.6(9)   |
| C22 | 24.0(11) | 19.1(10) | 29.0(12) | 3.6(9)    | -2.1(9)   | 1.9(9)    |
| C23 | 38.6(15) | 22.0(12) | 53.3(16) | -6.5(12)  | -20.7(13) | 3.8(11)   |
| C24 | 17.0(10) | 20.7(10) | 20.6(10) | -2.2(8)   | 1.1(8)    | 1.9(8)    |
| C25 | 17.3(9)  | 17.8(9)  | 16.0(9)  | 2.5(8)    | -0.1(7)   | -0.8(8)   |
| C26 | 17.4(9)  | 17.0(9)  | 13.5(9)  | -0.7(8)   | -0.9(7)   | 3.0(8)    |
| C27 | 17.7(9)  | 17.1(10) | 19.5(10) | 0.1(8)    | 2.2(8)    | 1.3(8)    |
| C28 | 23.3(10) | 16.3(10) | 14.4(9)  | -3.0(8)   | 1.4(8)    | 0.2(8)    |
| C29 | 25.8(11) | 19.9(10) | 20.5(10) | -3.2(9)   | 6.6(8)    | -0.7(9)   |
| C30 | 34.4(12) | 21.3(11) | 19.9(10) | -4.2(9)   | 10.6(9)   | -6.4(10)  |
| C31 | 17.8(10) | 27.1(12) | 29.4(12) | -4.3(9)   | -1.8(8)   | 2.2(9)    |
| C32 | 14.4(9)  | 22.9(10) | 18.9(10) | 2.1(8)    | -2.2(7)   | -1.3(8)   |
| C33 | 15.9(10) | 20.6(10) | 22.6(11) | 4.6(8)    | 1.0(8)    | 1.3(8)    |
| C34 | 24.0(10) | 18.3(10) | 13.2(9)  | -3.3(8)   | 0.2(8)    | -0.2(8)   |
| C35 | 16.9(9)  | 20.5(10) | 13.8(9)  | -3.8(8)   | 3.3(7)    | 0.7(8)    |
| C36 | 20.7(10) | 25.0(11) | 12.9(9)  | -3.9(8)   | 0.8(7)    | 2.2(8)    |
| C37 | 20.2(10) | 32.9(12) | 17.7(10) | -5.8(9)   | -0.7(8)   | -1.9(9)   |
| C38 | 23.1(11) | 31.9(12) | 22.9(11) | -6.0(9)   | 6.5(9)    | -8.0(9)   |
| C39 | 28.4(12) | 23.9(11) | 21.0(11) | 0.9(9)    | 9.0(9)    | -3.1(9)   |
| C40 | 20.3(10) | 25.3(11) | 17.1(10) | 0.1(8)    | 3.6(8)    | 2.6(9)    |
| C41 | 21.5(10) | 23.3(11) | 16.4(10) | -4.6(8)   | -1.8(8)   | 2.1(9)    |
| C42 | 31.8(12) | 18.3(11) | 16.3(10) | -0.4(8)   | -1.5(9)   | 2.5(9)    |
| C43 | 40.3(13) | 18.8(10) | 16.6(10) | 2.0(8)    | 3.1(9)    | -3.0(10)  |
| C44 | 24.4(12) | 72(2)    | 24.7(12) | 6.6(13)   | 5.1(9)    | -4.3(13)  |

**Table S6 Bond Lengths for cxy1304\_0m.**

| Atom | Atom | Length/Å | Atom | Atom | Length/Å |
|------|------|----------|------|------|----------|
| O1   | C2   | 1.470(2) | C10  | C11  | 1.522(3) |
| O1   | C3   | 1.339(2) | C12  | C14  | 1.385(3) |
| O2   | C3   | 1.217(2) | C13  | C14  | 1.392(3) |
| O3   | C15  | 1.216(3) | C15  | C16  | 1.475(3) |
| O4   | C24  | 1.461(2) | C16  | C17  | 1.386(3) |
| O4   | C25  | 1.339(2) | C16  | C21  | 1.391(3) |
| O5   | C41  | 1.213(3) | C17  | C18  | 1.384(3) |
| O6   | C25  | 1.213(2) | C18  | C19  | 1.389(3) |
| N1   | C3   | 1.357(3) | C19  | C20  | 1.392(4) |
| N1   | C4   | 1.470(2) | C20  | C21  | 1.381(4) |
| N1   | C10  | 1.471(2) | C23  | C24  | 1.507(3) |

|    |     |          |     |     |          |
|----|-----|----------|-----|-----|----------|
| N2 | C4  | 1.470(3) | C24 | C31 | 1.522(3) |
| N2 | C12 | 1.417(3) | C24 | C44 | 1.512(3) |
| N2 | C15 | 1.386(3) | C26 | C27 | 1.555(3) |
| N3 | C25 | 1.357(3) | C26 | C35 | 1.507(3) |
| N3 | C26 | 1.467(3) | C27 | C28 | 1.515(3) |
| N3 | C32 | 1.467(2) | C27 | C33 | 1.526(3) |
| N4 | C26 | 1.477(2) | C28 | C29 | 1.381(3) |
| N4 | C34 | 1.415(3) | C28 | C34 | 1.395(3) |
| N4 | C41 | 1.389(3) | C29 | C30 | 1.392(3) |
| C1 | C2  | 1.514(3) | C30 | C43 | 1.381(3) |
| C2 | C9  | 1.521(3) | C32 | C33 | 1.528(3) |
| C2 | C22 | 1.520(3) | C34 | C42 | 1.383(3) |
| C4 | C5  | 1.556(3) | C35 | C36 | 1.388(3) |
| C4 | C17 | 1.502(3) | C35 | C40 | 1.378(3) |
| C5 | C6  | 1.518(3) | C36 | C37 | 1.385(3) |
| C5 | C11 | 1.528(3) | C36 | C41 | 1.486(3) |
| C6 | C7  | 1.383(3) | C37 | C38 | 1.388(3) |
| C6 | C12 | 1.391(3) | C38 | C39 | 1.393(3) |
| C7 | C8  | 1.397(3) | C39 | C40 | 1.394(3) |
| C8 | C13 | 1.382(3) | C42 | C43 | 1.394(3) |

**Table S7 Bond Angles for cxy1304\_0m.**

| Atom | Atom | Atom | Angle/°    | Atom | Atom | Atom | Angle/°    |
|------|------|------|------------|------|------|------|------------|
| C3   | O1   | C2   | 121.96(16) | C16  | C17  | C4   | 109.26(18) |
| C25  | O4   | C24  | 122.22(16) | C18  | C17  | C4   | 129.29(18) |
| C3   | N1   | C4   | 125.13(16) | C18  | C17  | C16  | 121.44(19) |
| C3   | N1   | C10  | 120.38(17) | C17  | C18  | C19  | 116.9(2)   |
| C4   | N1   | C10  | 113.92(15) | C18  | C19  | C20  | 121.7(2)   |
| C12  | N2   | C4   | 109.21(16) | C21  | C20  | C19  | 121.1(2)   |
| C15  | N2   | C4   | 112.34(17) | C20  | C21  | C16  | 117.2(2)   |
| C15  | N2   | C12  | 124.95(17) | O4   | C24  | C23  | 109.33(19) |
| C25  | N3   | C26  | 125.01(16) | O4   | C24  | C31  | 102.30(16) |
| C25  | N3   | C32  | 120.76(17) | O4   | C24  | C44  | 109.80(18) |
| C32  | N3   | C26  | 113.96(16) | C23  | C24  | C31  | 110.86(19) |
| C34  | N4   | C26  | 108.86(16) | C23  | C24  | C44  | 113.1(2)   |
| C41  | N4   | C26  | 112.68(17) | C44  | C24  | C31  | 110.86(19) |
| C41  | N4   | C34  | 125.54(17) | O4   | C25  | N3   | 109.99(17) |
| O1   | C2   | C1   | 110.29(17) | O6   | C25  | O4   | 126.59(18) |
| O1   | C2   | C9   | 101.94(16) | O6   | C25  | N3   | 123.42(18) |
| O1   | C2   | C22  | 110.03(16) | N3   | C26  | N4   | 112.97(16) |
| C1   | C2   | C9   | 110.53(17) | N3   | C26  | C27  | 102.25(15) |
| C1   | C2   | C22  | 112.10(19) | N3   | C26  | C35  | 114.61(16) |
| C22  | C2   | C9   | 111.49(18) | N4   | C26  | C27  | 104.44(16) |
| O1   | C3   | N1   | 110.47(16) | N4   | C26  | C35  | 102.58(15) |
| O2   | C3   | O1   | 126.46(19) | C35  | C26  | C27  | 119.88(17) |
| O2   | C3   | N1   | 123.05(18) | C28  | C27  | C26  | 101.66(16) |



|     |     |     |            |     |     |     |            |
|-----|-----|-----|------------|-----|-----|-----|------------|
| N1  | C4  | N2  | 113.05(16) | C28 | C27 | C33 | 115.81(17) |
| N1  | C4  | C5  | 102.14(15) | C33 | C27 | C26 | 104.59(16) |
| N1  | C4  | C17 | 114.41(16) | C29 | C28 | C27 | 130.05(19) |
| N2  | C4  | C5  | 104.54(15) | C29 | C28 | C34 | 119.64(19) |
| N2  | C4  | C17 | 102.68(15) | C34 | C28 | C27 | 110.26(17) |
| C17 | C4  | C5  | 119.95(17) | C28 | C29 | C30 | 118.6(2)   |
| C6  | C5  | C4  | 101.33(16) | C43 | C30 | C29 | 121.2(2)   |
| C6  | C5  | C11 | 116.56(17) | N3  | C32 | C33 | 102.47(16) |
| C11 | C5  | C4  | 104.56(16) | C27 | C33 | C32 | 103.69(16) |
| C7  | C6  | C5  | 130.03(19) | C28 | C34 | N4  | 109.58(17) |
| C7  | C6  | C12 | 119.4(2)   | C42 | C34 | N4  | 128.02(19) |
| C12 | C6  | C5  | 110.45(17) | C42 | C34 | C28 | 122.39(19) |
| C6  | C7  | C8  | 118.7(2)   | C36 | C35 | C26 | 109.27(18) |
| C13 | C8  | C7  | 120.9(2)   | C40 | C35 | C26 | 129.26(19) |
| N1  | C10 | C11 | 102.78(16) | C40 | C35 | C36 | 121.5(2)   |
| C10 | C11 | C5  | 104.04(16) | C35 | C36 | C41 | 109.69(18) |
| C6  | C12 | N2  | 109.34(18) | C37 | C36 | C35 | 121.4(2)   |
| C14 | C12 | N2  | 127.7(2)   | C37 | C36 | C41 | 128.8(2)   |
| C14 | C12 | C6  | 122.9(2)   | C36 | C37 | C38 | 117.5(2)   |
| C8  | C13 | C14 | 121.4(2)   | C37 | C38 | C39 | 121.0(2)   |
| C12 | C14 | C13 | 116.8(2)   | C38 | C39 | C40 | 121.2(2)   |
| O3  | C15 | N2  | 125.0(2)   | C35 | C40 | C39 | 117.4(2)   |
| O3  | C15 | C16 | 129.0(2)   | O5  | C41 | N4  | 124.9(2)   |
| N2  | C15 | C16 | 106.01(17) | O5  | C41 | C36 | 129.4(2)   |
| C17 | C16 | C15 | 109.50(18) | N4  | C41 | C36 | 105.61(17) |
| C17 | C16 | C21 | 121.5(2)   | C34 | C42 | C43 | 117.2(2)   |
| C21 | C16 | C15 | 128.9(2)   | C30 | C43 | C42 | 121.0(2)   |

**Table S8 Torsion Angles for cxy1304\_0m.**

| A  | B   | C   | D   | Angle/°     | A   | B   | C   | D   | Angle/°     |
|----|-----|-----|-----|-------------|-----|-----|-----|-----|-------------|
| O3 | C15 | C16 | C17 | -174.8(2)   | C15 | C16 | C21 | C20 | -177.5(2)   |
| O3 | C15 | C16 | C21 | 2.1(4)      | C16 | C17 | C18 | C19 | -2.6(3)     |
| N1 | C4  | C5  | C6  | 96.25(17)   | C17 | C4  | C5  | C6  | -136.03(18) |
| N1 | C4  | C5  | C11 | -25.29(19)  | C17 | C4  | C5  | C11 | 102.4(2)    |
| N1 | C4  | C17 | C16 | -124.46(18) | C17 | C16 | C21 | C20 | -0.9(3)     |
| N1 | C4  | C17 | C18 | 54.5(3)     | C17 | C18 | C19 | C20 | 0.8(3)      |
| N1 | C10 | C11 | C5  | -31.4(2)    | C18 | C19 | C20 | C21 | 0.8(4)      |
| N2 | C4  | C5  | C6  | -21.75(19)  | C19 | C20 | C21 | C16 | -0.8(3)     |
| N2 | C4  | C5  | C11 | -143.29(16) | C21 | C16 | C17 | C4  | -178.28(18) |
| N2 | C4  | C17 | C16 | -1.6(2)     | C21 | C16 | C17 | C18 | 2.7(3)      |
| N2 | C4  | C17 | C18 | 177.4(2)    | C24 | O4  | C25 | O6  | 6.0(3)      |
| N2 | C12 | C14 | C13 | 179.02(19)  | C24 | O4  | C25 | N3  | -174.41(17) |
| N2 | C15 | C16 | C17 | 3.6(2)      | C25 | O4  | C24 | C23 | 61.0(3)     |
| N2 | C15 | C16 | C21 | -179.5(2)   | C25 | O4  | C24 | C31 | 178.55(19)  |
| N3 | C26 | C27 | C28 | -96.17(17)  | C25 | O4  | C24 | C44 | -63.7(3)    |
| N3 | C26 | C27 | C33 | 24.7(2)     | C25 | N3  | C26 | N4  | 58.3(3)     |

|              |             |               |             |
|--------------|-------------|---------------|-------------|
| N3 C26C35C36 | 124.00(18)  | C25 N3 C26C27 | 169.97(18)  |
| N3 C26C35C40 | -55.6(3)    | C25 N3 C26C35 | -58.7(3)    |
| N3 C32C33C27 | 32.6(2)     | C25 N3 C32C33 | 167.71(18)  |
| N4 C26C27C28 | 21.75(19)   | C26N3 C25 O4  | 3.7(3)      |
| N4 C26C27C33 | 142.62(16)  | C26N3 C25 O6  | -176.7(2)   |
| N4 C26C35C36 | 1.2(2)      | C26N3 C32C33  | -17.9(2)    |
| N4 C26C35C40 | -178.4(2)   | C26N4 C34C28  | 12.4(2)     |
| N4 C34C42C43 | -179.85(19) | C26N4 C34C42  | -168.6(2)   |
| C2 O1 C3 O2  | -16.4(3)    | C26N4 C41 O5  | -173.6(2)   |
| C2 O1 C3 N1  | 165.49(16)  | C26N4 C41 C36 | 4.3(2)      |
| C3 O1 C2 C1  | 70.3(2)     | C26C27C28C29  | 167.2(2)    |
| C3 O1 C2 C9  | -172.33(17) | C26C27C28C34  | -15.5(2)    |
| C3 O1 C2 C22 | -53.9(2)    | C26C27C33C32  | -36.0(2)    |
| C3 N1 C4 N2  | -53.9(2)    | C26C35C36C37  | 178.53(19)  |
| C3 N1 C4 C5  | -165.61(18) | C26C35C36C41  | 1.3(2)      |
| C3 N1 C4 C17 | 63.2(2)     | C26C35C40C39  | -178.0(2)   |
| C3 N1 C10C11 | -172.11(17) | C27C26C35C36  | -113.8(2)   |
| C4 N1 C3 O1  | -8.3(3)     | C27C26C35C40  | 66.6(3)     |
| C4 N1 C3 O2  | 173.56(19)  | C27C28C29C30  | 176.7(2)    |
| C4 N1 C10C11 | 16.1(2)     | C27C28C34N4   | 2.8(2)      |
| C4 N2 C12C6  | -11.3(2)    | C27C28C34C42  | -176.32(19) |
| C4 N2 C12C14 | 169.1(2)    | C28C27C33C32  | 74.9(2)     |
| C4 N2 C15O3  | 173.70(19)  | C28C29C30C43  | -0.9(3)     |
| C4 N2 C15C16 | -4.8(2)     | C28C34C42C43  | -1.0(3)     |
| C4 C5 C6 C7  | -168.1(2)   | C29C28C34N4   | -179.58(18) |
| C4 C5 C6 C12 | 16.2(2)     | C29C28C34C42  | 1.3(3)      |
| C4 C5 C11C10 | 35.7(2)     | C29C30C43C42  | 1.3(3)      |
| C4 C17C18C19 | 178.6(2)    | C32N3 C25 O4  | 177.38(18)  |
| C5 C4 C17C16 | 113.7(2)    | C32N3 C25 O6  | -3.0(3)     |
| C5 C4 C17C18 | -67.4(3)    | C32N3 C26N4   | -115.77(19) |
| C5 C6 C7 C8  | -174.5(2)   | C32N3 C26C27  | -4.1(2)     |
| C5 C6 C12N2  | -3.9(2)     | C32N3 C26C35  | 127.20(19)  |
| C5 C6 C12C14 | 175.74(18)  | C33C27C28C29  | 54.5(3)     |
| C6 C5 C11C10 | -75.2(2)    | C33C27C28C34  | -128.17(19) |
| C6 C7 C8 C13 | -0.3(3)     | C34N4 C26N3   | 88.63(19)   |
| C6 C12C14C13 | -0.6(3)     | C34N4 C26C27  | -21.7(2)    |
| C7 C6 C12N2  | 179.80(18)  | C34N4 C26C35  | -147.45(16) |
| C7 C6 C12C14 | -0.5(3)     | C34N4 C41 O5  | -36.8(3)    |
| C7 C8 C13C14 | -0.9(3)     | C34N4 C41 C36 | 141.13(19)  |
| C8 C13C14C12 | 1.3(3)      | C34C28C29C30  | -0.4(3)     |
| C10N1 C3 O1  | -179.08(17) | C34C42C43C30  | -0.3(3)     |
| C10N1 C3 O2  | 2.8(3)      | C35C26C27C28  | 135.79(18)  |
| C10N1 C4 N2  | 117.46(18)  | C35C26C27C33  | -103.3(2)   |
| C10N1 C4 C5  | 5.7(2)      | C35C36C37C38  | -0.1(3)     |
| C10N1 C4 C17 | -125.46(18) | C35C36C41 O5  | 174.4(2)    |
| C11C5 C6 C7  | -55.3(3)    | C35C36C41 N4  | -3.4(2)     |
| C11C5 C6 C12 | 128.95(19)  | C36C35C40C39  | 2.5(3)      |
| C12N2 C4 N1  | -89.17(19)  | C36C37C38C39  | 1.3(3)      |

|              |             |              |             |
|--------------|-------------|--------------|-------------|
| C12N2 C4 C5  | 21.1(2)     | C37C36C41 O5 | -2.6(4)     |
| C12N2 C4 C17 | 147.05(16)  | C37C36C41 N4 | 179.6(2)    |
| C12N2 C15 O3 | 37.5(3)     | C37C38C39C40 | -0.7(3)     |
| C12N2 C15C16 | -140.92(19) | C38C39C40C35 | -1.2(3)     |
| C12C6 C7 C8  | 0.9(3)      | C40C35C36C37 | -1.9(3)     |
| C15N2 C4 N1  | 127.78(18)  | C40C35C36C41 | -179.08(18) |
| C15N2 C4 C5  | -121.95(17) | C41N4 C26N3  | -127.42(18) |
| C15N2 C4 C17 | 4.0(2)      | C41N4 C26C27 | 122.27(18)  |
| C15N2 C12C6  | 126.0(2)    | C41N4 C26C35 | -3.5(2)     |
| C15N2 C12C14 | -53.6(3)    | C41N4 C34C28 | -125.8(2)   |
| C15C16C17C4  | -1.2(2)     | C41N4 C34C42 | 53.2(3)     |
| C15C16C17C18 | 179.81(18)  | C41C36C37C38 | 176.6(2)    |

**Table S9 Hydrogen Atom Coordinates ( $\text{\AA} \times 10^4$ ) and Isotropic Displacement Parameters ( $\text{\AA}^2 \times 10^3$ ) for cxy1304\_0m.**

| Atom | x        | y       | z        | U(eq) |
|------|----------|---------|----------|-------|
| H1A  | 2180.24  | 3539.19 | -2343.81 | 38    |
| H1B  | 3827.79  | 3424.88 | -2126.2  | 38    |
| H1C  | 3129.63  | 4347.84 | -1993.57 | 38    |
| H5   | -1240.35 | 5605.52 | 1990.26  | 20    |
| H7   | -3372.09 | 4263.88 | 2796.45  | 26    |
| H8   | -2995.05 | 3101.86 | 3981.6   | 30    |
| H9A  | 4254.53  | 4410.9  | -114.21  | 33    |
| H9B  | 4896.75  | 3472.92 | -251.89  | 33    |
| H9C  | 3938.69  | 3668.14 | 723.01   | 33    |
| H10A | -2338.88 | 3879.13 | -11.4    | 22    |
| H10B | -2243.04 | 4617.67 | -910.9   | 22    |
| H11A | -3342.98 | 4981.41 | 876.18   | 22    |
| H11B | -2425.48 | 5698.66 | 314.52   | 22    |
| H13  | -829.55  | 2450.6  | 4192.72  | 31    |
| H14  | 1026.06  | 2912.02 | 3190.77  | 28    |
| H18  | 188.62   | 6412.29 | -199.35  | 26    |
| H19  | 2069.92  | 7375.57 | -106.9   | 34    |
| H20  | 4056.46  | 7110.08 | 1000.53  | 36    |
| H21  | 4257.68  | 5855.58 | 2035.97  | 31    |
| H22A | 2242.73  | 2510.97 | 200.87   | 36    |
| H22B | 3196.73  | 2232.03 | -745.71  | 36    |
| H22C | 1587.09  | 2455.34 | -1010.36 | 36    |
| H23A | 6492.04  | 7503.45 | 7901.37  | 59    |
| H23B | 4863.45  | 7710.06 | 7725.71  | 59    |
| H23C | 5775.41  | 7572.8  | 6709.52  | 59    |
| H27  | 9590.68  | 4394.14 | 4927.57  | 22    |
| H29  | 11980.24 | 5635.69 | 4327.66  | 26    |
| H30  | 11925.65 | 6845.3  | 3208.16  | 30    |
| H31A | 4298.35  | 6425.68 | 5951     | 37    |
| H31B | 3257.51  | 6520.95 | 6895.66  | 37    |
| H31C | 3941.82  | 5609.19 | 6662.28  | 37    |

|      |          |         |         |    |
|------|----------|---------|---------|----|
| H32A | 10327.88 | 5367.11 | 7880.1  | 23 |
| H32B | 10589.06 | 6089.45 | 6987.2  | 23 |
| H33A | 11611.08 | 4933.9  | 6197.38 | 24 |
| H33B | 10542.6  | 4260.42 | 6680.06 | 24 |
| H37  | 4064.51  | 4394.35 | 4447.94 | 28 |
| H38  | 3997.42  | 3110.35 | 5430.33 | 31 |
| H39  | 5818.57  | 2741.76 | 6664.17 | 29 |
| H40  | 7782.73  | 3635.69 | 6934.94 | 25 |
| H42  | 7810.48  | 7190.48 | 3620.11 | 27 |
| H43  | 9874.22  | 7596.26 | 2832.13 | 30 |
| H44A | 5046.24  | 5478.45 | 8554.25 | 60 |
| H44B | 4190.8   | 6329.19 | 8800.56 | 60 |
| H44C | 5837.6   | 6294.92 | 9078.51 | 60 |

**Table S10 Crystal data and structure refinement for cxy1304\_0m.**

|                                             |                                                               |
|---------------------------------------------|---------------------------------------------------------------|
| Identification code                         | cxy1304_0m                                                    |
| Empirical formula                           | C <sub>22</sub> H <sub>22</sub> N <sub>2</sub> O <sub>3</sub> |
| Formula weight                              | 362.41                                                        |
| Temperature/K                               | 100.0                                                         |
| Crystal system                              | monoclinic                                                    |
| Space group                                 | P2 <sub>1</sub>                                               |
| a/Å                                         | 9.6179(7)                                                     |
| b/Å                                         | 15.5833(12)                                                   |
| c/Å                                         | 12.4610(9)                                                    |
| α/°                                         | 90                                                            |
| β/°                                         | 93.679(3)                                                     |
| γ/°                                         | 90                                                            |
| Volume/Å <sup>3</sup>                       | 1863.8(2)                                                     |
| Z                                           | 4                                                             |
| ρ <sub>calc</sub> /cm <sup>3</sup>          | 1.292                                                         |
| μ/mm <sup>-1</sup>                          | 0.087                                                         |
| F(000)                                      | 768.0                                                         |
| Crystal size/mm <sup>3</sup>                | 0.34 × 0.32 × 0.29                                            |
| Radiation                                   | MoKα (λ = 0.71073)                                            |
| 2θ range for data collection/°              | 4.984 to 55.086                                               |
| Index ranges                                | -12 ≤ h ≤ 12, -20 ≤ k ≤ 20, -16 ≤ l ≤ 16                      |
| Reflections collected                       | 44261                                                         |
| Independent reflections                     | 8583 [R <sub>int</sub> = 0.0475, R <sub>sigma</sub> = 0.0345] |
| Data/restraints/parameters                  | 8583/1/494                                                    |
| Goodness-of-fit on F <sup>2</sup>           | 1.023                                                         |
| Final R indexes [I ≥ 2σ (I)]                | R <sub>1</sub> = 0.0344, wR <sub>2</sub> = 0.0786             |
| Final R indexes [all data]                  | R <sub>1</sub> = 0.0416, wR <sub>2</sub> = 0.0830             |
| Largest diff. peak/hole / e Å <sup>-3</sup> | 0.27/-0.18                                                    |
| Flack parameter                             | 0.4(3)                                                        |

## X-Ray details of compound *cis*-34

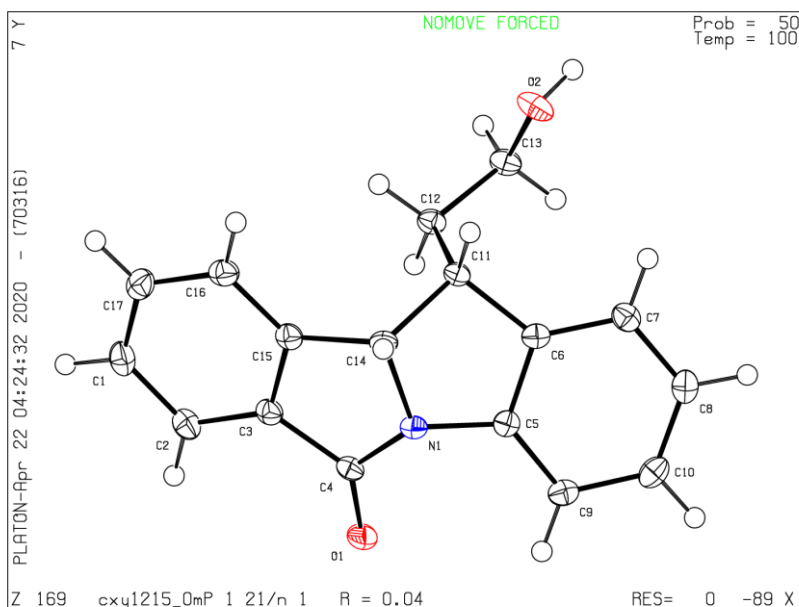

**cxy1215\_0m** (CCDC number 2101130)

**Table S11 Crystal data and structure refinement for cxy1215\_0m.**

|                                    |                                                               |
|------------------------------------|---------------------------------------------------------------|
| Identification code                | cxy1215_0m                                                    |
| Empirical formula                  | C <sub>17</sub> H <sub>15</sub> NO <sub>2</sub>               |
| Formula weight                     | 265.30                                                        |
| Temperature/K                      | 100                                                           |
| Crystal system                     | monoclinic                                                    |
| Space group                        | P2 <sub>1</sub> /n                                            |
| a/Å                                | 10.4073(6)                                                    |
| b/Å                                | 8.7265(5)                                                     |
| c/Å                                | 14.6032(7)                                                    |
| α/°                                | 90                                                            |
| β/°                                | 94.709(2)                                                     |
| γ/°                                | 90                                                            |
| Volume/Å <sup>3</sup>              | 1321.78(12)                                                   |
| Z                                  | 4                                                             |
| ρ <sub>calc</sub> /cm <sup>3</sup> | 1.333                                                         |
| μ/mm <sup>-1</sup>                 | 0.088                                                         |
| F(000)                             | 560.0                                                         |
| Crystal size/mm <sup>3</sup>       | 0.34 × 0.29 × 0.12                                            |
| Radiation                          | MoKα (λ = 0.71073)                                            |
| 2θ range for data collection/°     | 4.632 to 55.162                                               |
| Index ranges                       | -13 ≤ h ≤ 13, -11 ≤ k ≤ 9, -18 ≤ l ≤ 19                       |
| Reflections collected              | 18279                                                         |
| Independent reflections            | 3054 [R <sub>int</sub> = 0.0357, R <sub>sigma</sub> = 0.0229] |
| Data/restraints/parameters         | 3054/0/183                                                    |
| Goodness-of-fit on F <sup>2</sup>  | 1.054                                                         |

Final R indexes [ $I \geq 2\sigma(I)$ ]  $R_1 = 0.0365$ ,  $wR_2 = 0.0919$   
 Final R indexes [all data]  $R_1 = 0.0430$ ,  $wR_2 = 0.0960$   
 Largest diff. peak/hole /  $e \text{ \AA}^{-3}$  0.31/-0.20

**Table S12 Fractional Atomic Coordinates ( $\times 10^4$ ) and Equivalent Isotropic Displacement Parameters ( $\text{\AA}^2 \times 10^3$ ) for cxy1215\_0m.  $U_{eq}$  is defined as 1/3 of of the trace of the orthogonalised  $U_{ij}$  tensor.**

| Atom | x          | y          | z         | U(eq)   |
|------|------------|------------|-----------|---------|
| O1   | 4575.9(8)  | 2426.3(10) | 878.5(5)  | 21.1(2) |
| O2   | 1532.6(8)  | 3810.9(10) | 4907.7(6) | 23.8(2) |
| N1   | 3831.5(9)  | 4160.0(10) | 1903.4(6) | 15.3(2) |
| C1   | 7765.9(11) | 2381.4(14) | 3150.8(8) | 22.0(3) |
| C2   | 6929.1(11) | 2276.5(13) | 2358.7(8) | 20.2(2) |
| C3   | 5794.2(10) | 3121.5(12) | 2330.2(7) | 16.3(2) |
| C4   | 4715.5(10) | 3154.7(12) | 1599.5(7) | 15.8(2) |
| C5   | 2475.3(10) | 4087.4(11) | 1758.0(7) | 14.9(2) |
| C6   | 1941.2(11) | 4373.3(12) | 2589.3(7) | 15.1(2) |
| C7   | 613.0(11)  | 4449.3(12) | 2603.4(8) | 18.5(2) |
| C8   | -156.1(11) | 4202.1(13) | 1783.6(8) | 20.6(2) |
| C9   | 1731.5(11) | 3806.3(12) | 943.7(7)  | 17.9(2) |
| C10  | 397.2(11)  | 3861.4(13) | 975.0(8)  | 20.3(2) |
| C11  | 2998.3(10) | 4486.3(12) | 3372.3(7) | 14.2(2) |
| C12  | 3135.0(11) | 2996.1(12) | 3937.0(7) | 16.3(2) |
| C13  | 1925.5(11) | 2547.7(12) | 4388.3(8) | 18.3(2) |
| C14  | 4199.1(10) | 4799.2(12) | 2827.4(7) | 14.9(2) |
| C15  | 5481.5(10) | 4037.6(12) | 3063.7(7) | 15.9(2) |
| C16  | 6340.0(11) | 4170.5(13) | 3839.7(7) | 19.3(2) |
| C17  | 7481.9(11) | 3326.6(14) | 3877.5(8) | 21.3(3) |

**Table S13 Anisotropic Displacement Parameters ( $\text{\AA}^2 \times 10^3$ ) for cxy1215\_0m. The Anisotropic displacement factor exponent takes the form:  $-2\pi^2[h^2a^{*2}U_{11}+2hka^*b^*U_{12}+\dots]$ .**

| Atom | $U_{11}$ | $U_{22}$ | $U_{33}$ | $U_{23}$ | $U_{13}$ | $U_{12}$ |
|------|----------|----------|----------|----------|----------|----------|
| O1   | 20.9(4)  | 26.1(4)  | 16.5(4)  | -6.1(3)  | 3.6(3)   | 0.8(3)   |
| O2   | 27.2(5)  | 22.5(4)  | 23.7(4)  | -5.5(3)  | 13.4(3)  | -5.9(3)  |
| N1   | 17.4(5)  | 15.9(4)  | 12.7(4)  | -1.1(3)  | 2.1(3)   | -0.3(3)  |
| C1   | 14.7(5)  | 22.8(6)  | 28.6(6)  | 3.0(5)   | 3.0(4)   | -0.6(4)  |
| C2   | 17.4(6)  | 20.3(6)  | 23.5(6)  | -1.7(4)  | 5.0(4)   | -1.6(4)  |
| C3   | 15.8(5)  | 16.6(5)  | 16.8(5)  | 0.0(4)   | 3.4(4)   | -3.7(4)  |
| C4   | 16.7(5)  | 16.1(5)  | 15.1(5)  | 0.9(4)   | 5.0(4)   | -1.7(4)  |
| C5   | 17.1(5)  | 11.3(5)  | 16.3(5)  | 1.6(4)   | 1.4(4)   | 1.1(4)   |
| C6   | 19.5(5)  | 11.3(5)  | 14.6(5)  | 0.9(4)   | 1.8(4)   | 0.5(4)   |
| C7   | 19.5(5)  | 16.3(5)  | 20.3(5)  | 1.0(4)   | 4.4(4)   | 1.6(4)   |
| C8   | 16.3(5)  | 19.1(5)  | 26.1(6)  | 2.7(4)   | 0.1(4)   | -0.1(4)  |
| C9   | 23.0(6)  | 15.2(5)  | 15.4(5)  | -0.2(4)  | 1.0(4)   | 1.4(4)   |
| C10  | 22.9(6)  | 16.3(5)  | 20.6(5)  | 1.3(4)   | -4.5(4)  | -1.7(4)  |
| C11  | 16.2(5)  | 12.8(5)  | 13.8(5)  | -0.5(4)  | 3.2(4)   | -0.1(4)  |
| C12  | 19.3(5)  | 14.5(5)  | 15.6(5)  | 1.4(4)   | 3.5(4)   | 0.9(4)   |

|     |         |         |         |         |         |         |
|-----|---------|---------|---------|---------|---------|---------|
| C13 | 22.4(6) | 15.5(5) | 17.6(5) | 0.2(4)  | 5.1(4)  | -1.8(4) |
| C14 | 18.7(5) | 13.1(5) | 12.9(5) | -1.3(4) | 2.1(4)  | -1.9(4) |
| C15 | 16.3(5) | 14.7(5) | 17.0(5) | 1.7(4)  | 3.2(4)  | -3.7(4) |
| C16 | 20.6(5) | 20.8(5) | 16.8(5) | -0.9(4) | 2.8(4)  | -5.4(4) |
| C17 | 17.7(5) | 24.0(6) | 21.9(5) | 4.1(4)  | -1.0(4) | -6.3(4) |

**Table S14 Bond Lengths for cxy1215\_0m.**

| Atom | Atom | Length/Å   | Atom | Atom | Length/Å   |
|------|------|------------|------|------|------------|
| O1   | C4   | 1.2282(13) | C6   | C7   | 1.3857(15) |
| O2   | C13  | 1.4172(13) | C6   | C11  | 1.5235(14) |
| N1   | C4   | 1.3711(14) | C7   | C8   | 1.4011(15) |
| N1   | C5   | 1.4115(14) | C8   | C10  | 1.3878(17) |
| N1   | C14  | 1.4810(13) | C9   | C10  | 1.3941(16) |
| C1   | C2   | 1.3925(16) | C11  | C12  | 1.5402(14) |
| C1   | C17  | 1.3947(17) | C11  | C14  | 1.5597(14) |
| C2   | C3   | 1.3901(16) | C12  | C13  | 1.5193(15) |
| C3   | C4   | 1.4843(15) | C14  | C15  | 1.5054(15) |
| C3   | C15  | 1.3962(15) | C15  | C16  | 1.3892(15) |
| C5   | C6   | 1.3984(15) | C16  | C17  | 1.3953(17) |
| C5   | C9   | 1.3864(14) |      |      |            |

**Table S15 Bond Angles for cxy1215\_0m.**

| Atom | Atom | Atom | Angle/°    | Atom | Atom | Atom | Angle/°    |
|------|------|------|------------|------|------|------|------------|
| C4   | N1   | C5   | 127.72(9)  | C6   | C7   | C8   | 118.72(10) |
| C4   | N1   | C14  | 113.95(9)  | C10  | C8   | C7   | 120.81(10) |
| C5   | N1   | C14  | 109.53(8)  | C5   | C9   | C10  | 116.96(10) |
| C2   | C1   | C17  | 120.91(11) | C8   | C10  | C9   | 121.28(10) |
| C3   | C2   | C1   | 117.51(10) | C6   | C11  | C12  | 112.12(8)  |
| C2   | C3   | C4   | 128.50(10) | C6   | C11  | C14  | 100.83(8)  |
| C2   | C3   | C15  | 122.12(10) | C12  | C11  | C14  | 112.23(9)  |
| C15  | C3   | C4   | 109.27(9)  | C13  | C12  | C11  | 113.97(9)  |
| O1   | C4   | N1   | 124.98(10) | O2   | C13  | C12  | 108.52(9)  |
| O1   | C4   | C3   | 129.45(10) | N1   | C14  | C11  | 103.95(8)  |
| N1   | C4   | C3   | 105.53(9)  | N1   | C14  | C15  | 101.56(8)  |
| C6   | C5   | N1   | 108.98(9)  | C15  | C14  | C11  | 122.56(9)  |
| C9   | C5   | N1   | 128.17(10) | C3   | C15  | C14  | 109.57(9)  |
| C9   | C5   | C6   | 122.85(10) | C16  | C15  | C3   | 119.92(10) |
| C5   | C6   | C11  | 110.43(9)  | C16  | C15  | C14  | 130.46(10) |
| C7   | C6   | C5   | 119.31(10) | C15  | C16  | C17  | 118.48(10) |
| C7   | C6   | C11  | 130.20(10) | C1   | C17  | C16  | 121.00(10) |

**Table S16 Torsion Angles for cxy1215\_0m.**

| A | B | C | D | Angle/° | A | B | C | D | Angle/° |
|---|---|---|---|---------|---|---|---|---|---------|
|---|---|---|---|---------|---|---|---|---|---------|

|                |             |                 |             |
|----------------|-------------|-----------------|-------------|
| N1 C5 C6 C7    | 176.29(9)   | C6 C5 C9 C10    | 1.80(16)    |
| N1 C5 C6 C11   | -6.19(11)   | C6 C7 C8 C10    | 1.09(16)    |
| N1 C5 C9 C10   | -177.27(10) | C6 C11 C12 C13  | -60.49(12)  |
| N1 C14 C15 C3  | 1.79(11)    | C6 C11 C14 N1   | -24.11(10)  |
| N1 C14 C15 C16 | 179.14(11)  | C6 C11 C14 C15  | -137.91(10) |
| C1 C2 C3 C4    | -176.48(10) | C7 C6 C11 C12   | 76.75(14)   |
| C1 C2 C3 C15   | -0.54(16)   | C7 C6 C11 C14   | -163.68(11) |
| C2 C1 C17 C16  | 1.30(17)    | C7 C8 C10 C9    | -2.25(17)   |
| C2 C3 C4 O1    | 1.85(19)    | C9 C5 C6 C7     | -2.93(16)   |
| C2 C3 C4 N1    | 179.72(11)  | C9 C5 C6 C11    | 174.58(9)   |
| C2 C3 C15 C14  | -179.86(10) | C11 C6 C7 C8    | -175.55(10) |
| C2 C3 C15 C16  | 2.47(16)    | C11 C12 C13 O2  | -53.34(12)  |
| C3 C15 C16 C17 | -2.46(16)   | C11 C14 C15 C3  | 116.78(10)  |
| C4 N1 C5 C6    | 134.17(10)  | C11 C14 C15 C16 | -65.87(15)  |
| C4 N1 C5 C9    | -46.66(16)  | C12 C11 C14 N1  | 95.38(9)    |
| C4 N1 C14 C11  | -127.69(9)  | C12 C11 C14 C15 | -18.42(13)  |
| C4 N1 C14 C15  | 0.39(11)    | C14 N1 C4 O1    | 175.74(10)  |
| C4 C3 C15 C14  | -3.23(12)   | C14 N1 C4 C3    | -2.25(11)   |
| C4 C3 C15 C16  | 179.10(9)   | C14 N1 C5 C6    | -10.80(11)  |
| C5 N1 C4 O1    | 32.03(17)   | C14 N1 C5 C9    | 168.37(10)  |
| C5 N1 C4 C3    | -145.96(10) | C14 C11 C12 C13 | -173.14(9)  |
| C5 N1 C14 C11  | 22.53(10)   | C14 C15 C16 C17 | -179.57(11) |
| C5 N1 C14 C15  | 150.61(8)   | C15 C3 C4 O1    | -174.50(11) |
| C5 C6 C7 C8    | 1.41(15)    | C15 C3 C4 N1    | 3.37(12)    |
| C5 C6 C11 C12  | -100.41(10) | C15 C16 C17 C1  | 0.63(16)    |
| C5 C6 C11 C14  | 19.16(11)   | C17 C1 C2 C3    | -1.33(17)   |
| C5 C9 C10 C8   | 0.80(16)    |                 |             |

**Table S17 Hydrogen Atom Coordinates ( $\text{\AA} \times 10^4$ ) and Isotropic Displacement Parameters ( $\text{\AA}^2 \times 10^3$ ) for cxy1215\_0m.**

| Atom | x        | y       | z       | U(eq) |
|------|----------|---------|---------|-------|
| H2   | 912.17   | 3548.26 | 5206.17 | 36    |
| H1   | 8540.79  | 1801.11 | 3196.81 | 26    |
| H2A  | 7126.52  | 1650.96 | 1856.68 | 24    |
| H7   | 231.34   | 4664.83 | 3158.26 | 22    |
| H8   | -1067.48 | 4268.49 | 1781.29 | 25    |
| H9   | 2113.8   | 3586.04 | 389.73  | 21    |
| H10  | -144     | 3661.98 | 432.19  | 24    |
| H11  | 2835.66  | 5375.03 | 3779.34 | 17    |
| H12A | 3366.85  | 2152.34 | 3528.33 | 20    |
| H12B | 3852.23  | 3118.6  | 4420.24 | 20    |
| H13A | 1232.15  | 2266.95 | 3913.15 | 22    |
| H13B | 2104.31  | 1651.65 | 4794.72 | 22    |
| H14  | 4329.16  | 5930.35 | 2776.15 | 18    |
| H16  | 6153.93  | 4820.99 | 4333.44 | 23    |
| H17  | 8074.99  | 3397.01 | 4406.12 | 26    |



## Experimental details

Single crystals of  $C_{17}H_{15}NO_2$  [**cxy1215\_0m**] were generated from ethyl acetate and hexane. A suitable crystal was selected on a **BrukerD8 venture microsource** diffractometer. The crystal was kept at 100 K during data collection. Using Olex2,<sup>[18]</sup> the structure was solved with the ShelXT<sup>[19]</sup> structure solution program using Intrinsic Phasing and refined with the ShelXL<sup>[20]</sup> refinement package using Least Squares minimisation.

## Crystal structure determination of [**cxy1215\_0m**]

**Crystal Data** for  $C_{17}H_{15}NO_2$  ( $M = 265.30$  g/mol): monoclinic, space group  $P2_1/n$  (no. 14),  $a = 10.4073(6)$  Å,  $b = 8.7265(5)$  Å,  $c = 14.6032(7)$  Å,  $\beta = 94.709(2)$ ,  $V = 1321.78(12)$  Å<sup>3</sup>,  $Z = 4$ ,  $T = 100$  K,  $00MoK\alpha = 0.088$  mm<sup>-1</sup>,  $D_{calc} = 1.333$  g/cm<sup>3</sup>, 18279 reflections measured (4.632  $\theta$  max),  $R_{int} = 0.0357$ ,  $R_{\sigma} = 0.0229$  which were used in all calculations. The final  $R_1$  was 0.0365 ( $I > 2\sigma(I)$ ) and  $wR_2$  was 0.0960 (all data).

## Refinement model description

Number of restraints - 0, number of constraints - unknown.

Details:

1. Fixed Uiso
  - At 1.2 times of:
    - All C(H) groups, All C(H,H) groups
  - At 1.5 times of:
    - All O(H) groups
  - 2.a Ternary CH refined with riding coordinates:
    - C11(H11), C14(H14)
  - 2.b Secondary CH2 refined with riding coordinates:
    - C12(H12A,H12B), C13(H13A,H13B)
  - 2.c Aromatic/amide H refined with riding coordinates:
    - C1(H1), C2(H2A), C7(H7), C8(H8), C9(H9), C10(H10), C16(H16), C17(H17)
  - 2.d Idealised tetrahedral OH refined as rotating group:
    - O2(H2)

# NMR Spectra

## <sup>1</sup>H NMR of S1

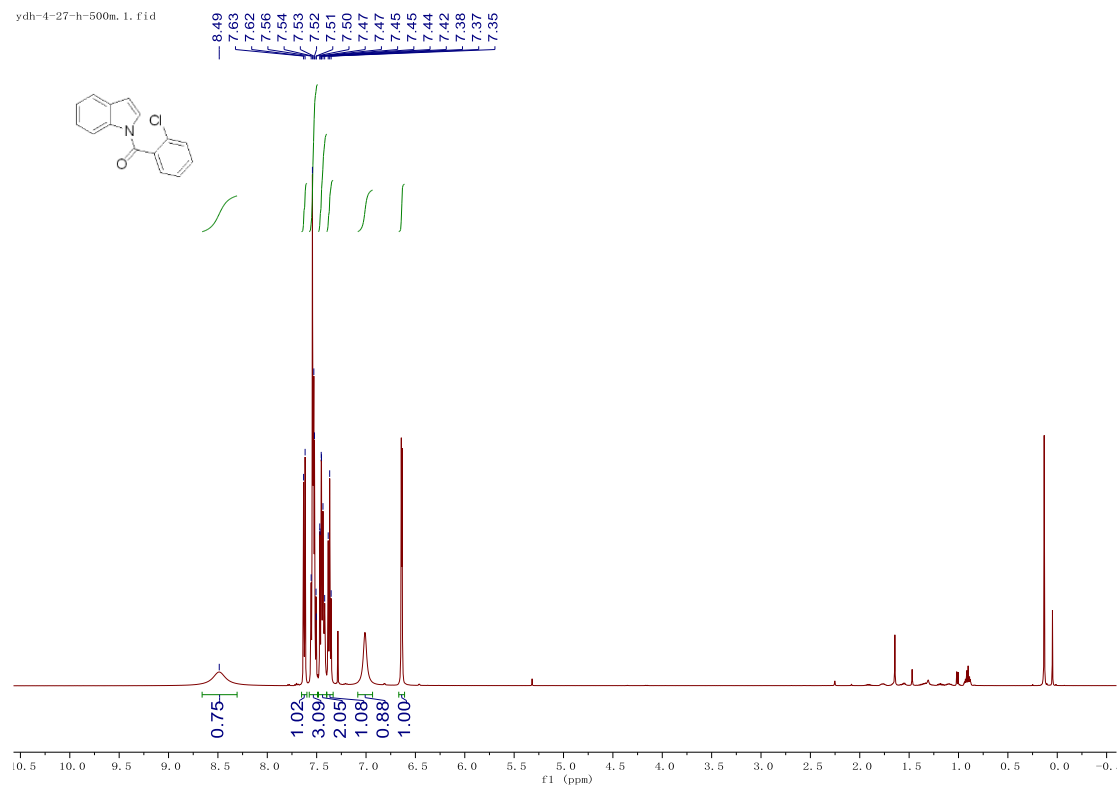

## <sup>1</sup>H NMR of S1'

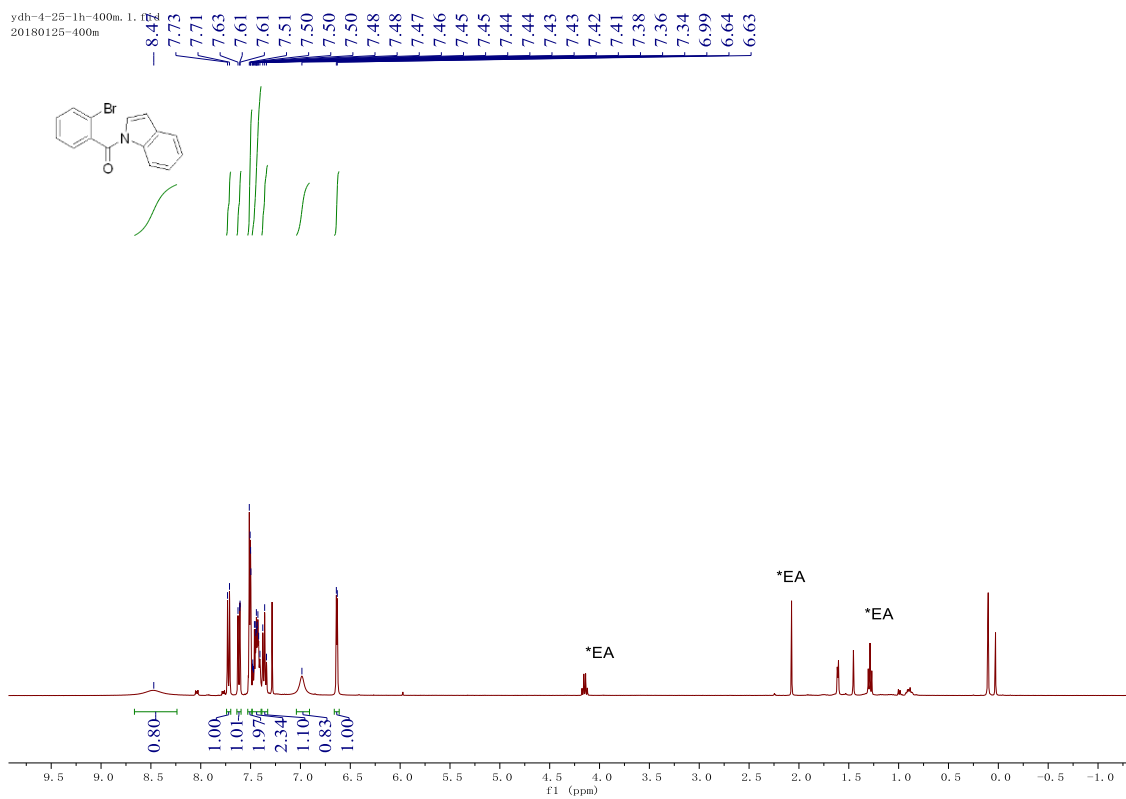

# <sup>1</sup>H NMR of S1''

ydh-3-198-indole-1-1H-0105.1.f1d  
20180105-300m

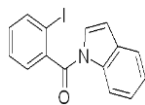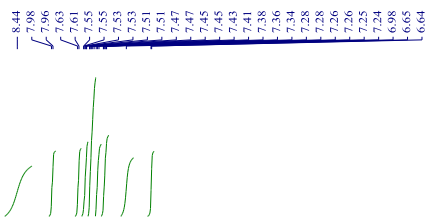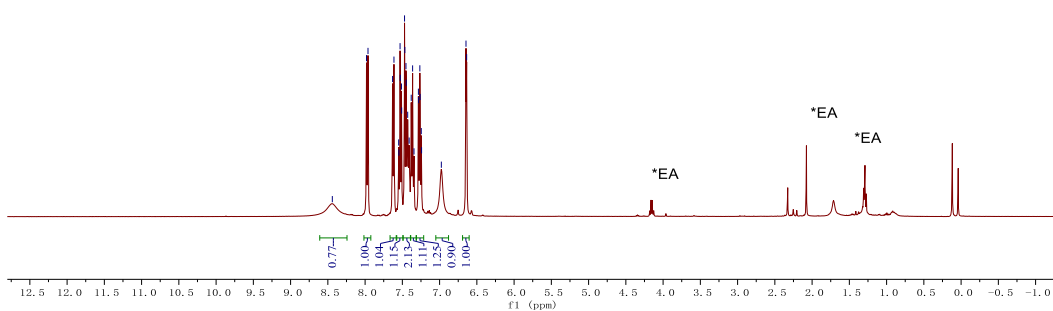

# <sup>1</sup>H NMR of S2

ydh-  
8.35  
7.75  
7.72  
7.68  
7.65  
7.63  
7.62  
7.52  
7.51  
7.50  
7.50  
7.49  
7.46  
7.45  
7.45  
7.44  
7.43  
7.00  
6.56

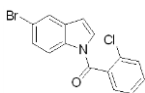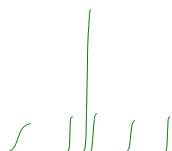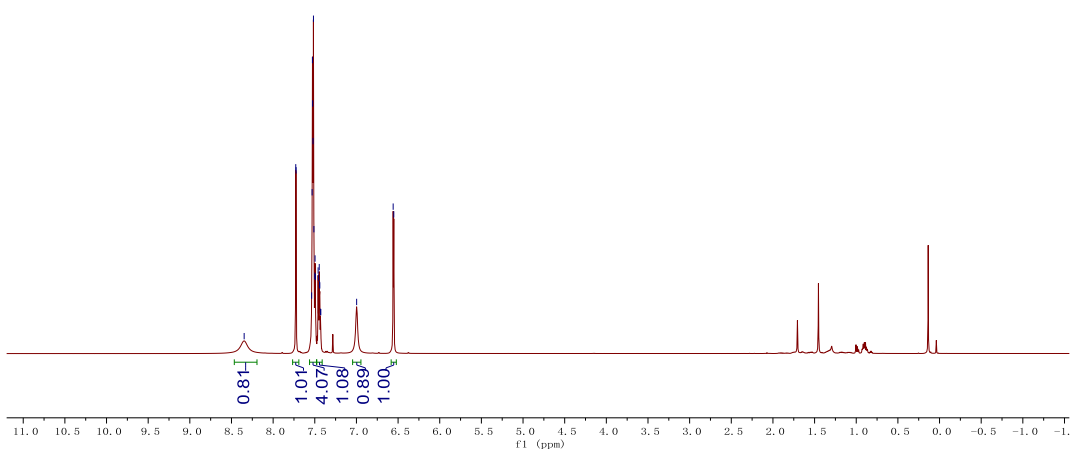

### <sup>13</sup>C NMR of S2

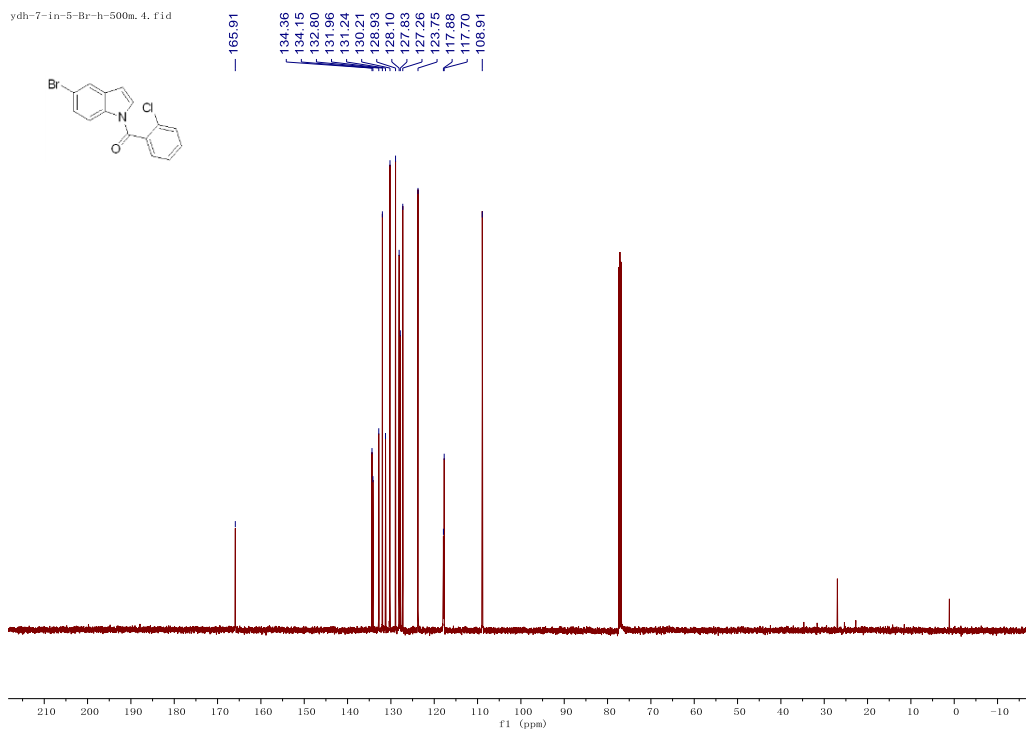

### <sup>1</sup>H NMR of S3

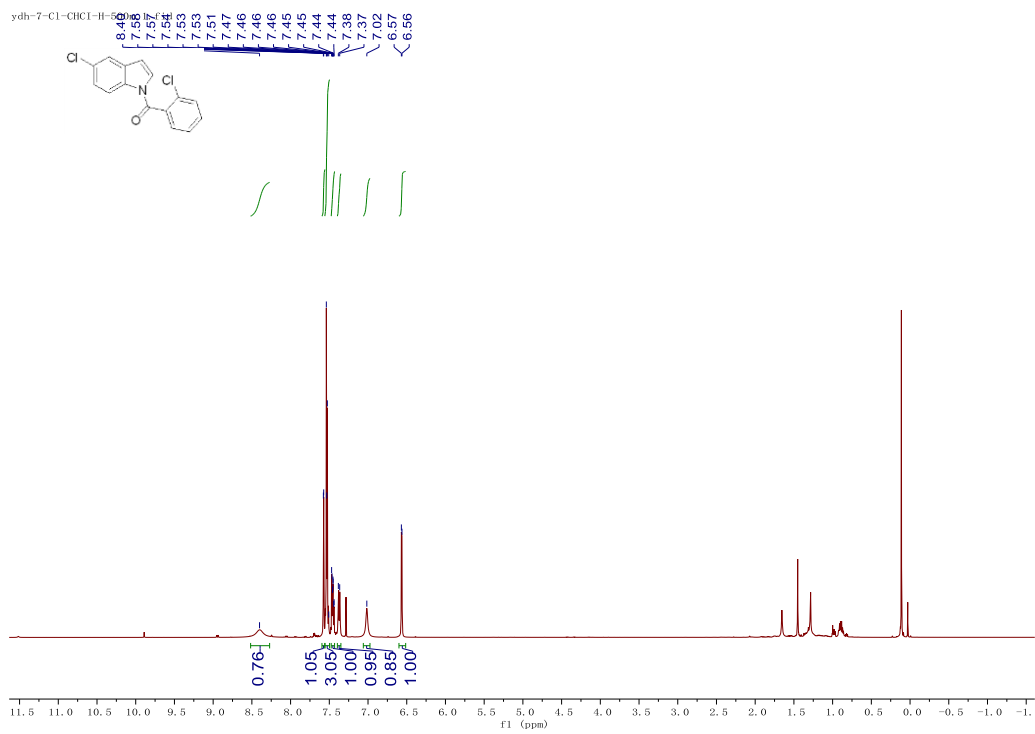

### <sup>13</sup>C NMR of S3

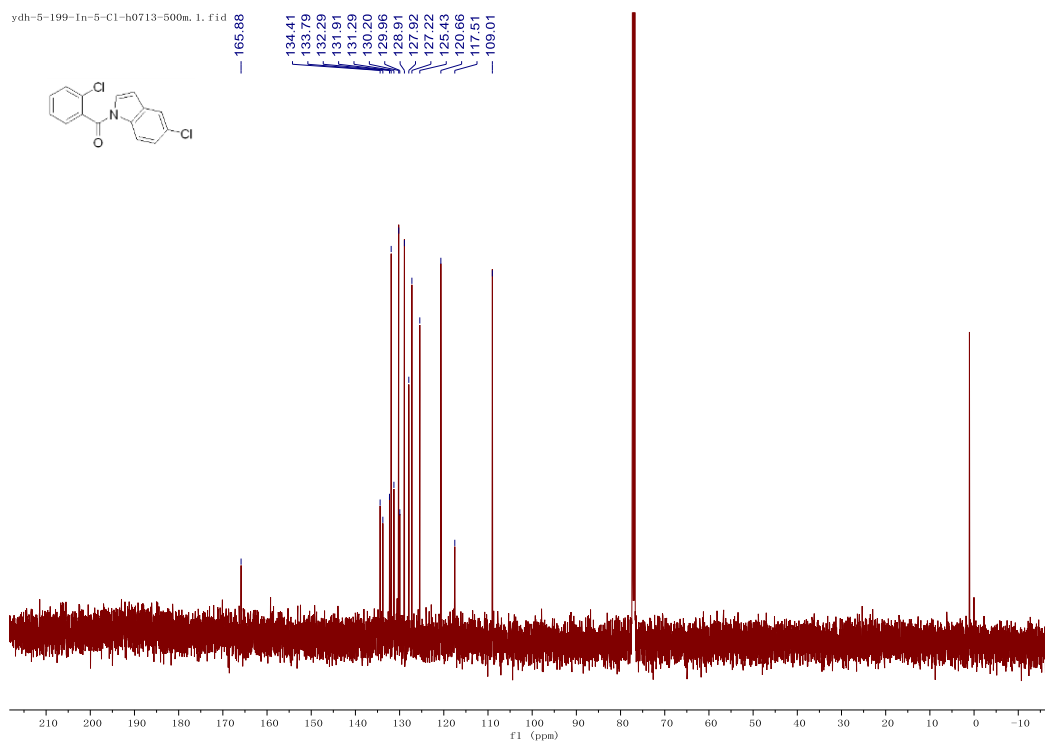

### <sup>1</sup>H NMR of S4

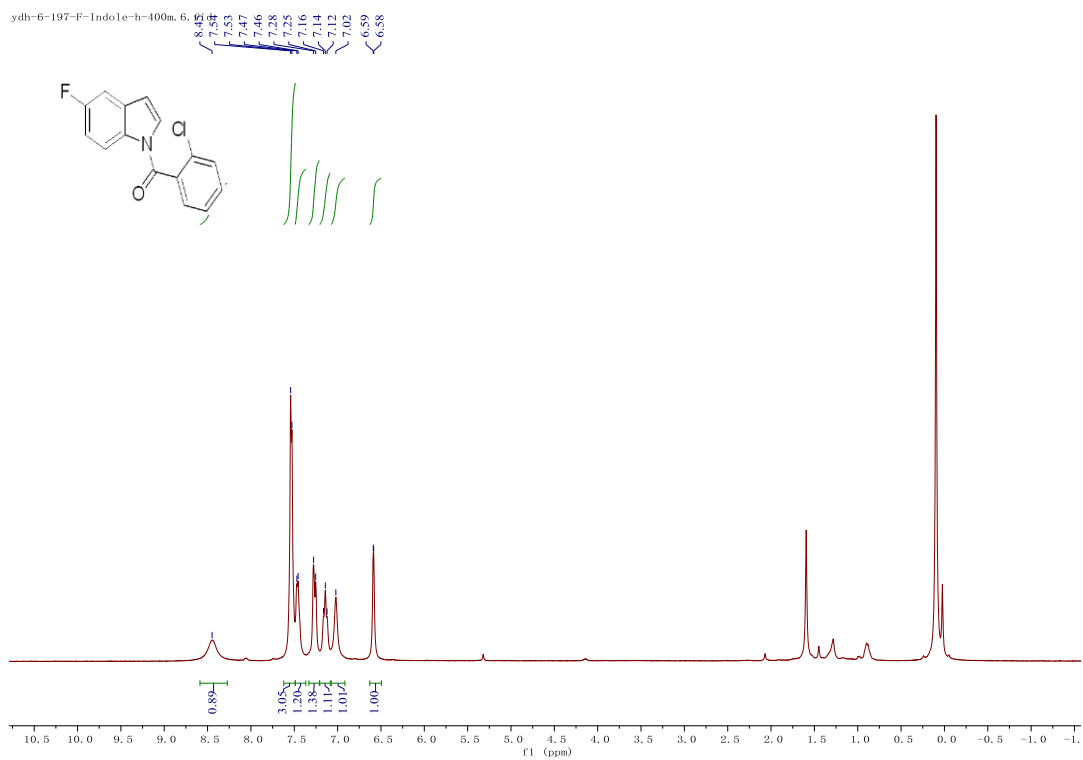

# <sup>19</sup>F NMR of S4

ydh-6-198-F-indole-F-400m.1.fid

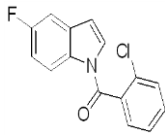

-118.26

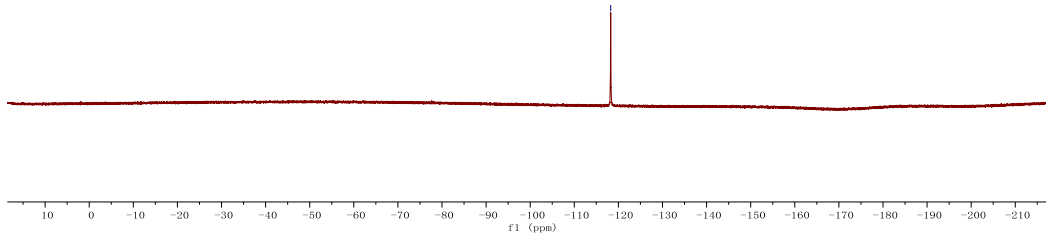

# <sup>13</sup>C NMR of S4

ydh-7-1n-5-F-S-h-400m.1.fid  
CDCl<sub>3</sub>

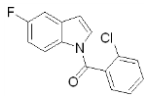

165.78  
163.38  
158.59  
134.52  
132.19  
132.09  
131.82  
131.29  
130.17  
128.90  
128.19  
127.18  
117.63  
117.55  
113.05  
112.81  
109.42  
109.39  
106.82  
106.58

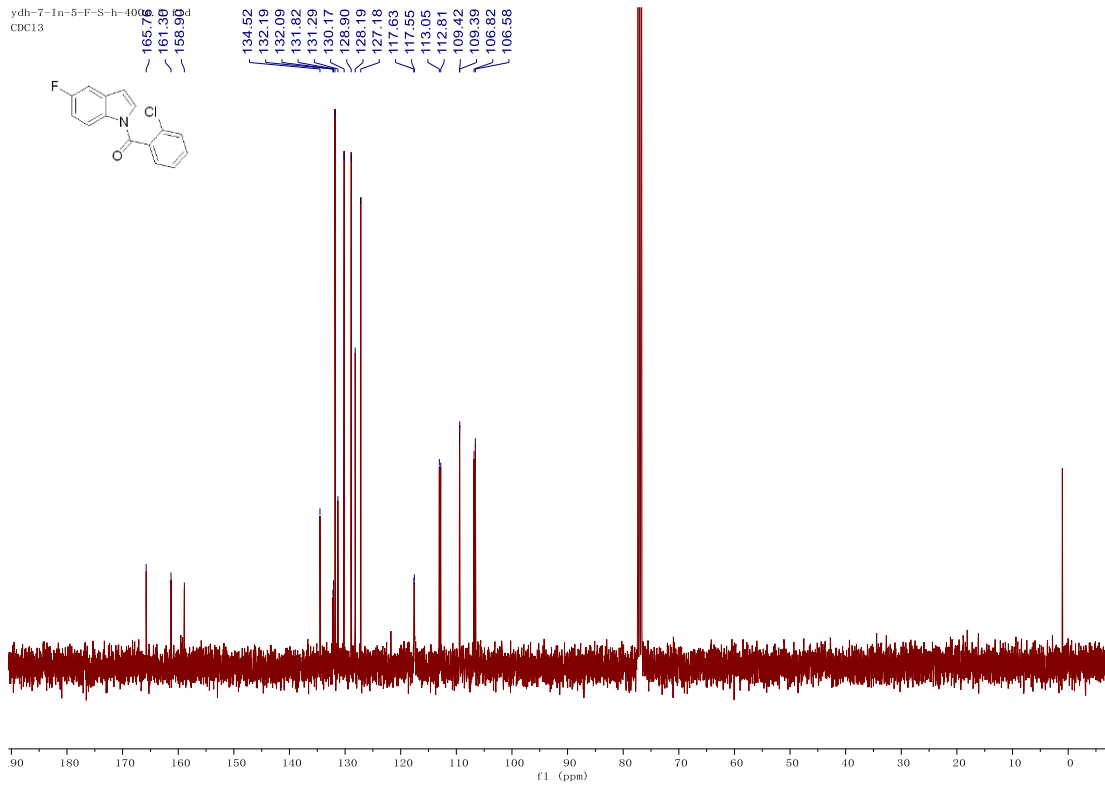

# <sup>1</sup>H NMR of S5

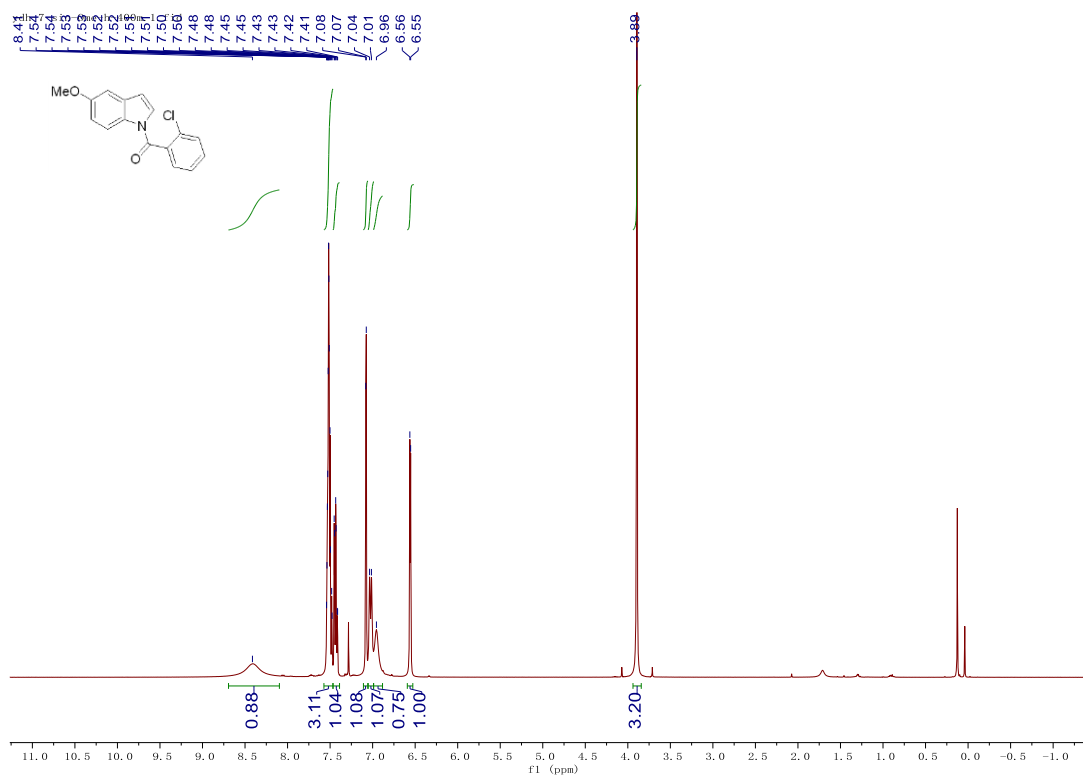

# <sup>13</sup>C NMR of S5

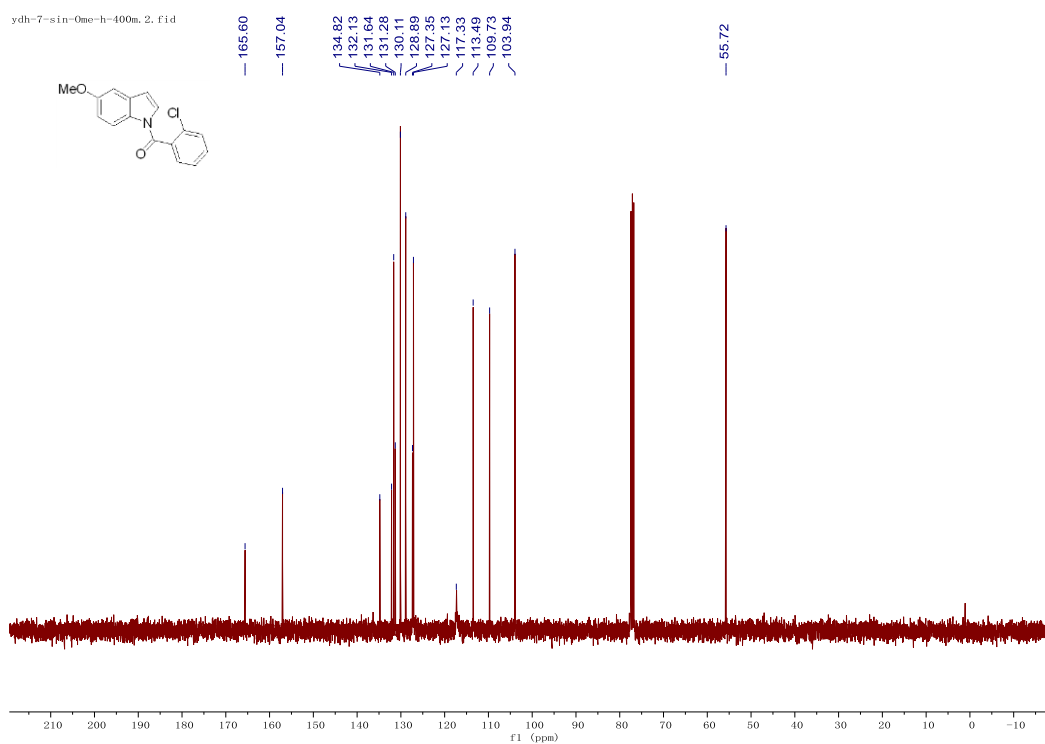

# <sup>1</sup>H NMR of S6

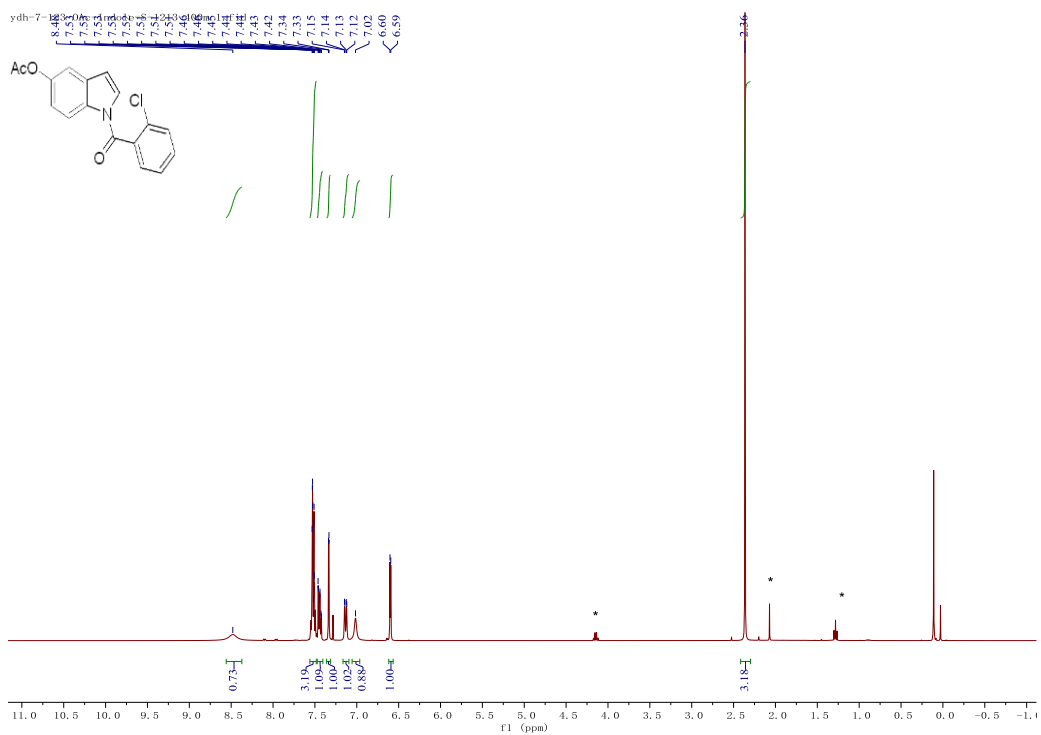

# <sup>13</sup>C NMR of S6

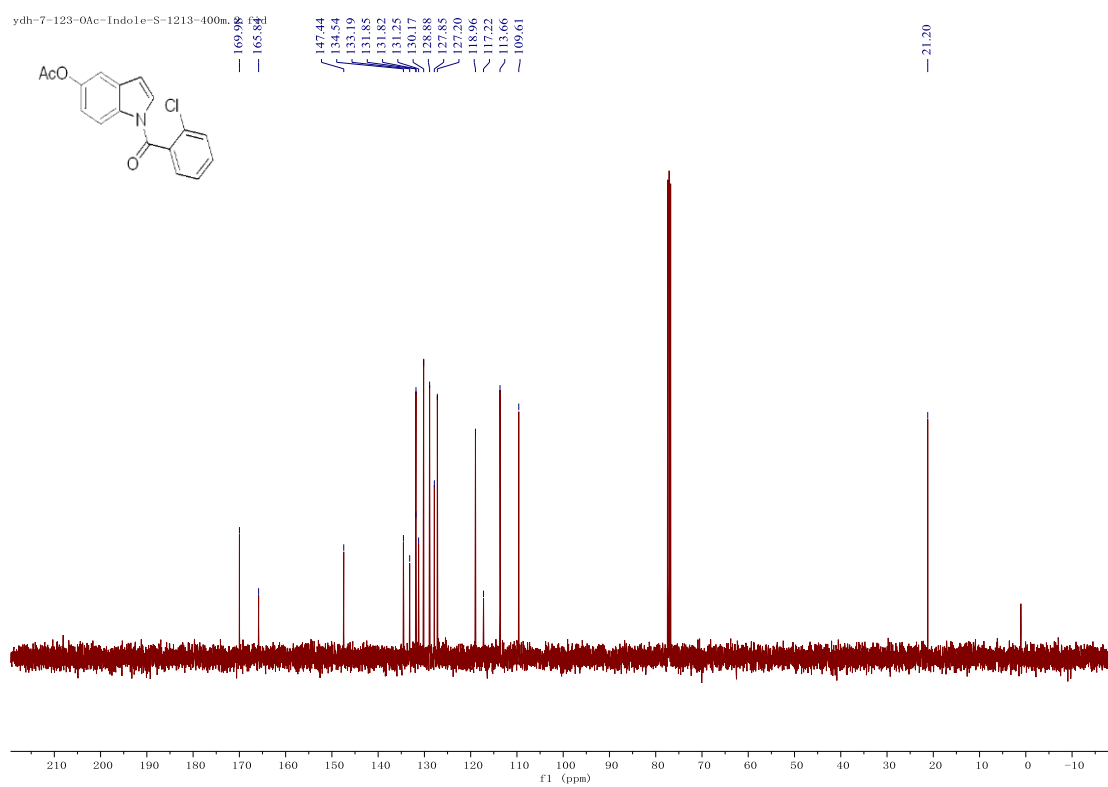



# <sup>1</sup>H NMR of S7

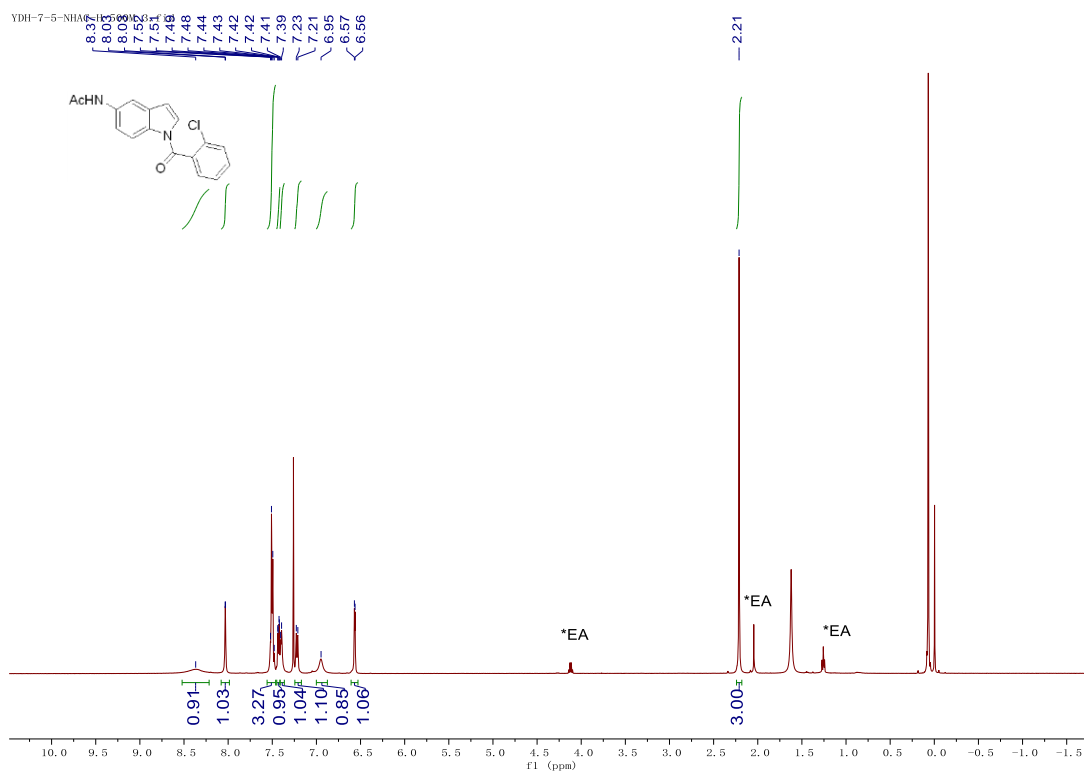

# <sup>13</sup>C NMR of S7

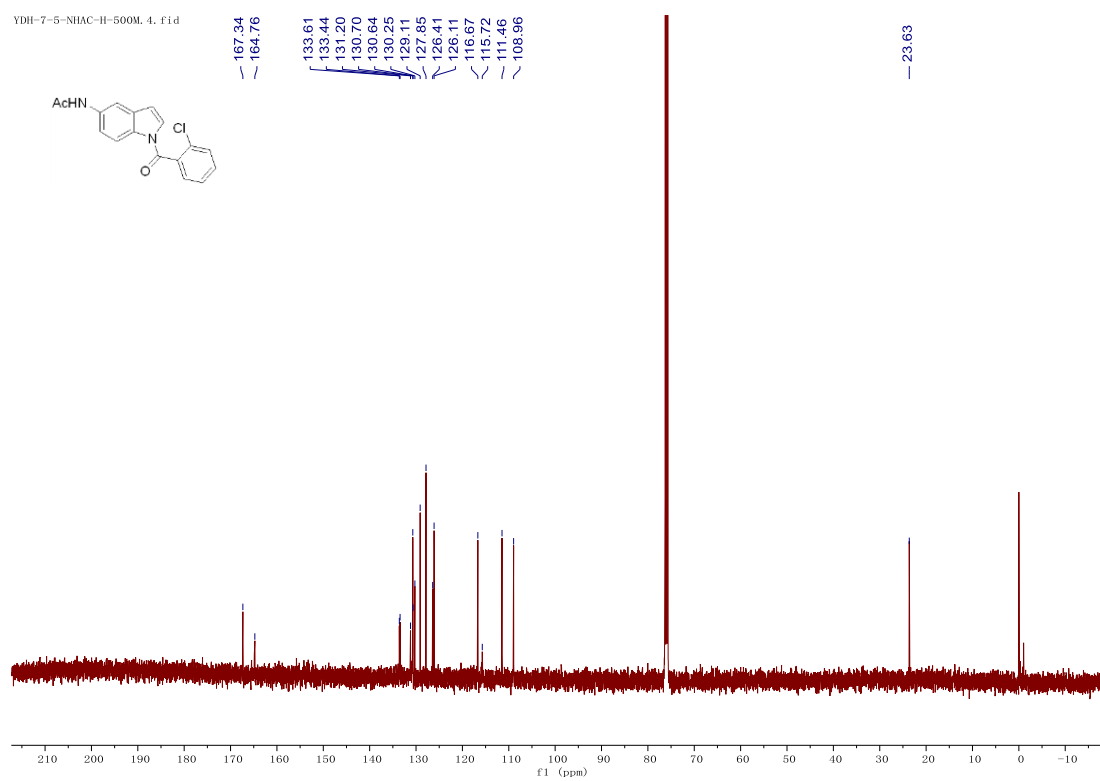

# <sup>1</sup>H NMR of S7'

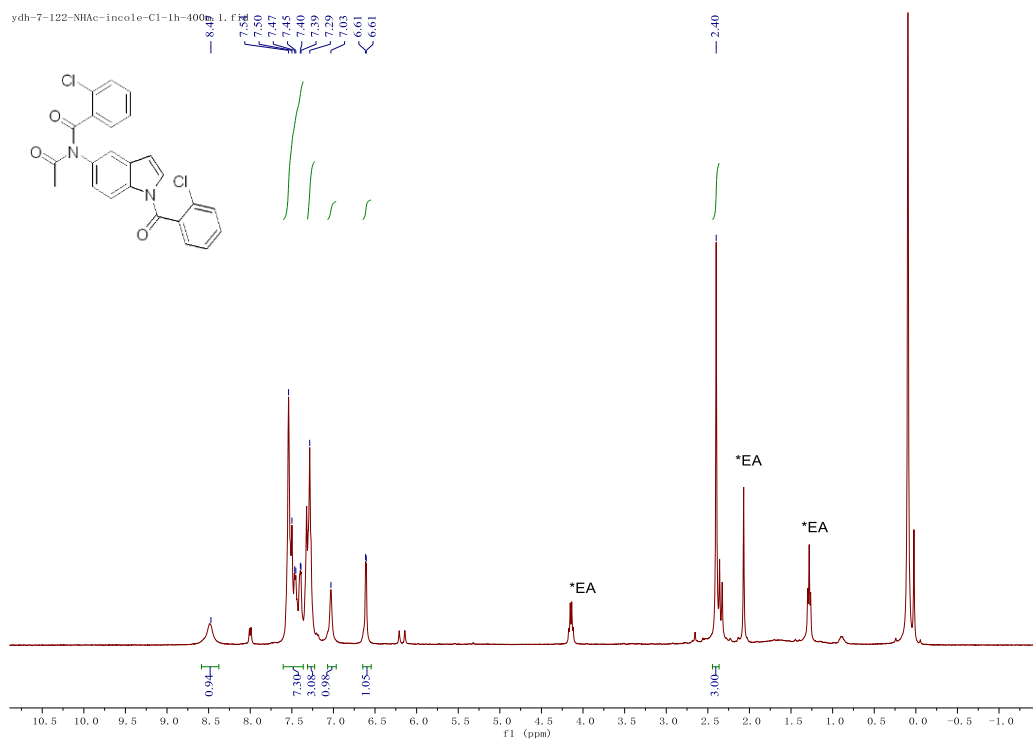

# <sup>13</sup>C NMR of S7'

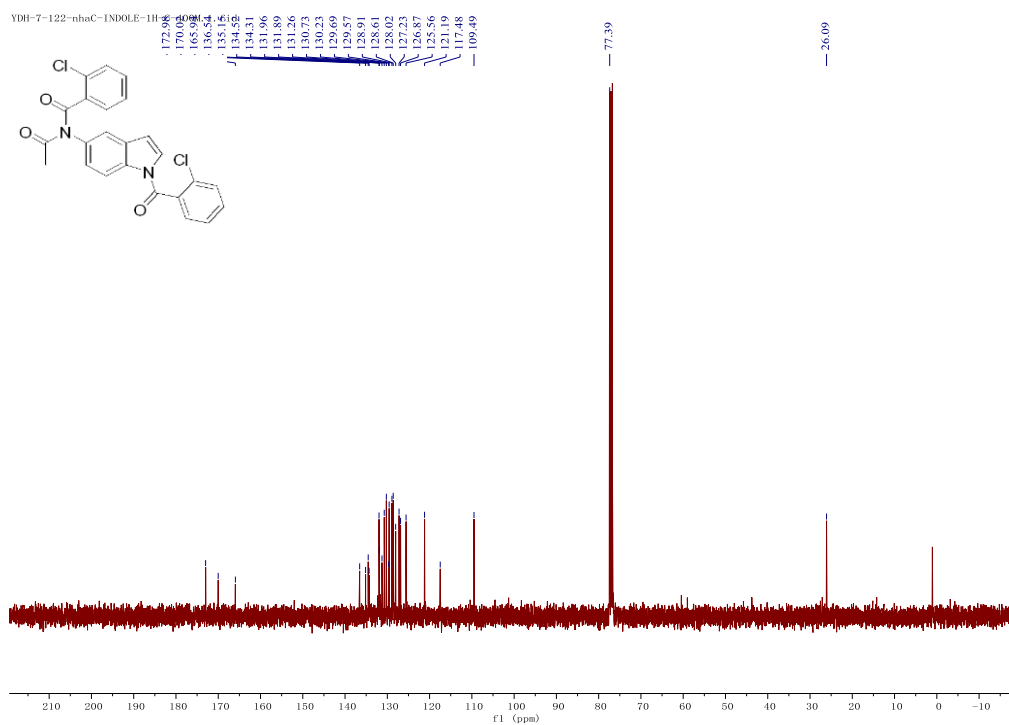

# <sup>1</sup>H NMR of S8

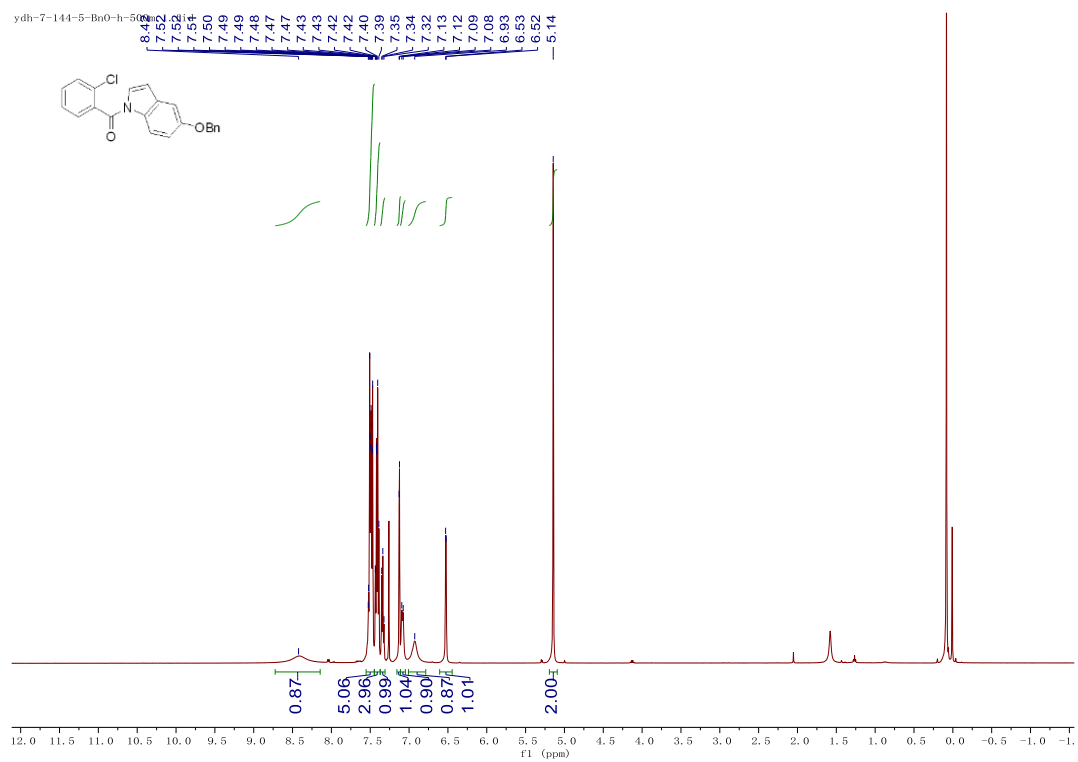

# <sup>13</sup>C NMR of S8

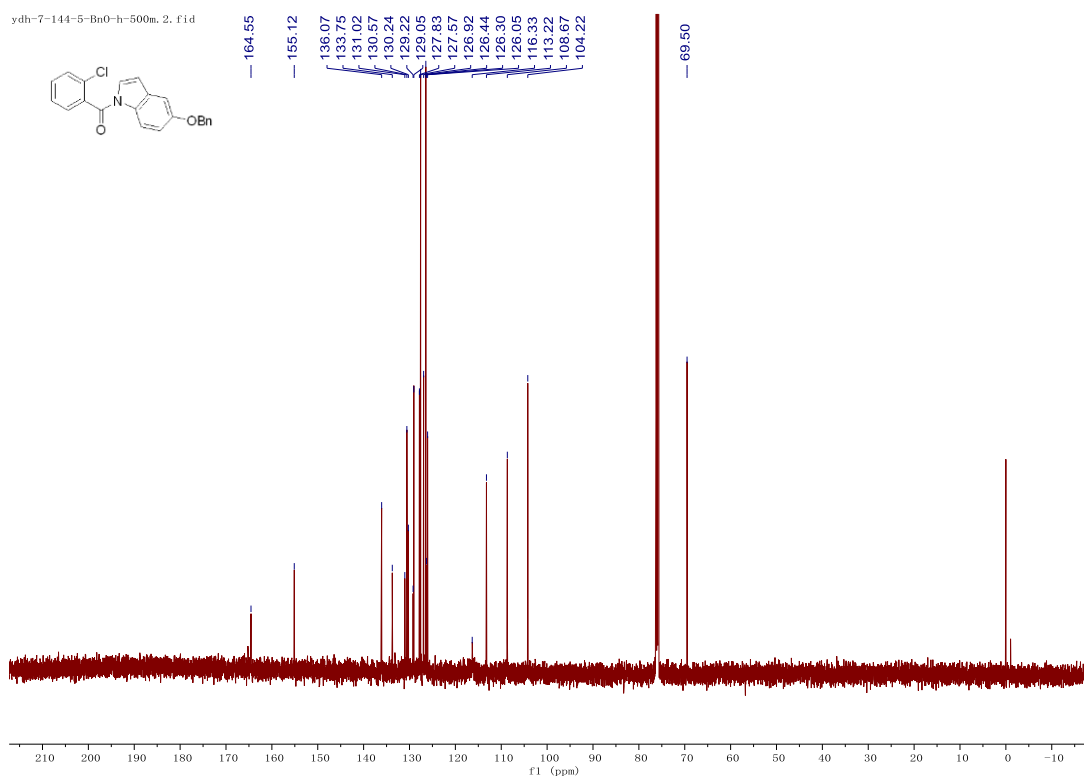

# <sup>1</sup>H NMR of S9

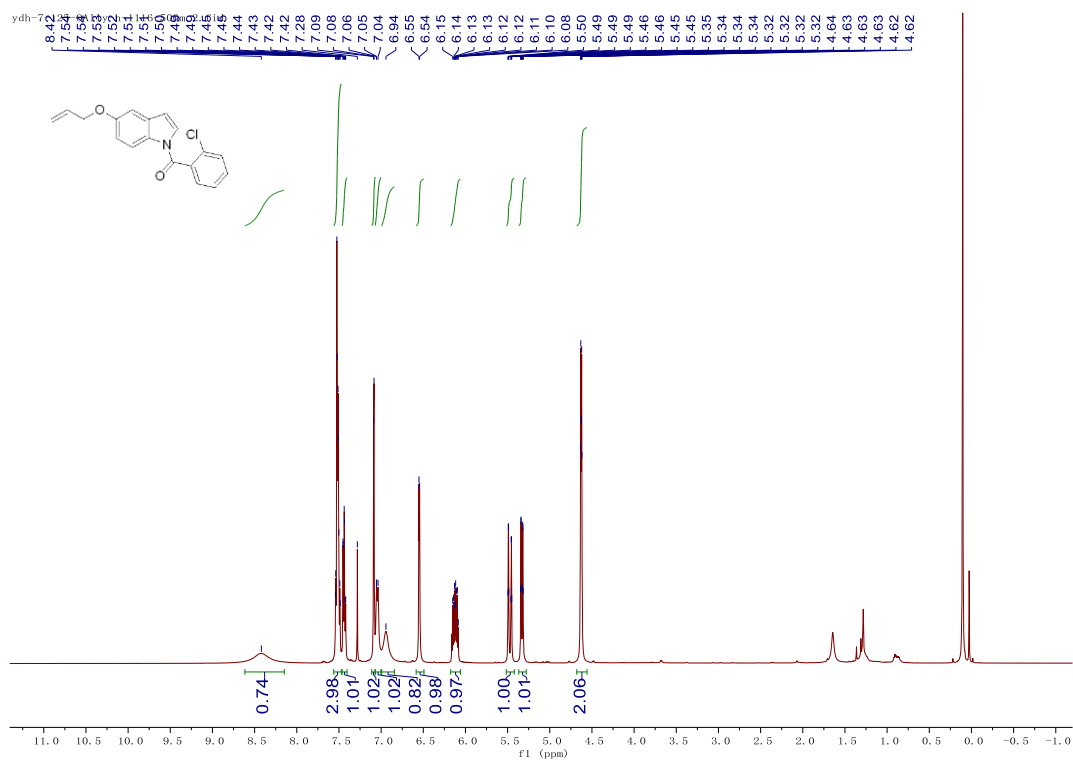

# <sup>13</sup>C NMR of S9

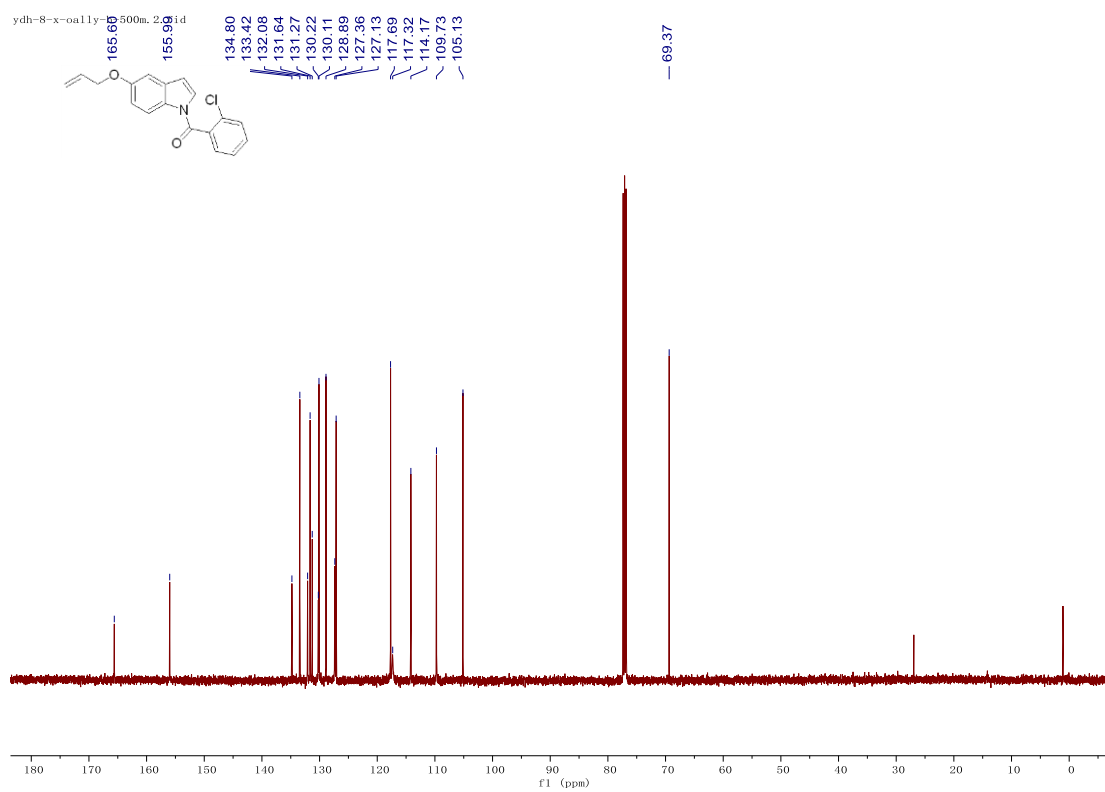

# <sup>1</sup>H NMR of S10

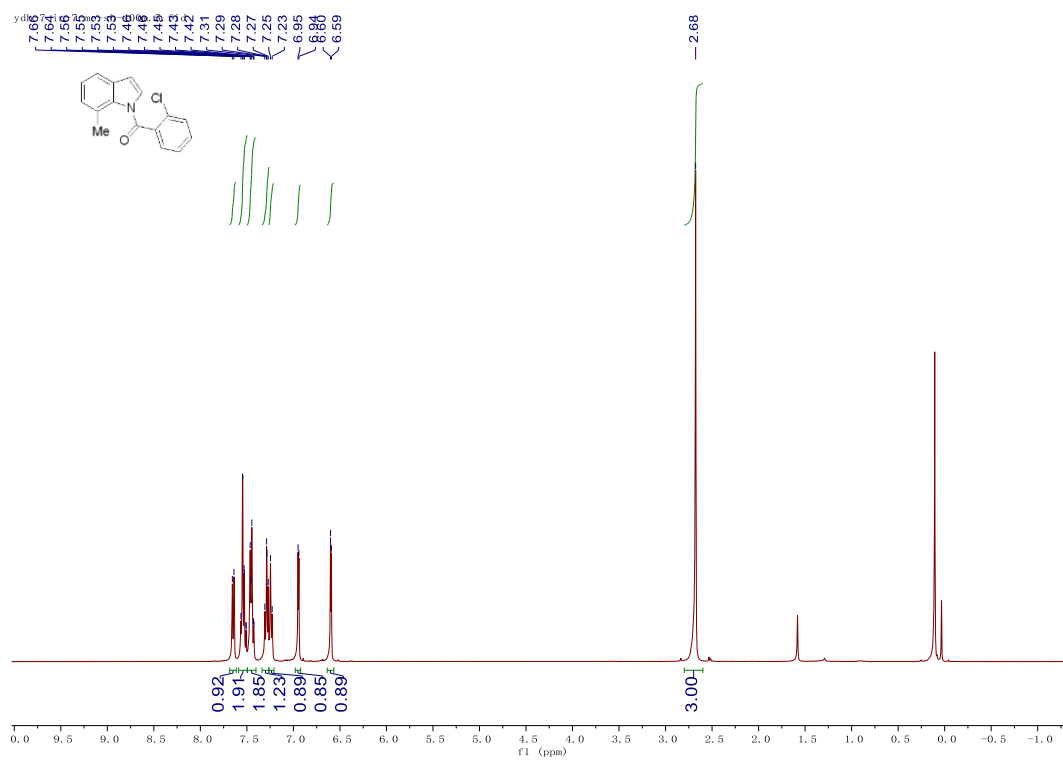

# <sup>13</sup>C NMR of S10

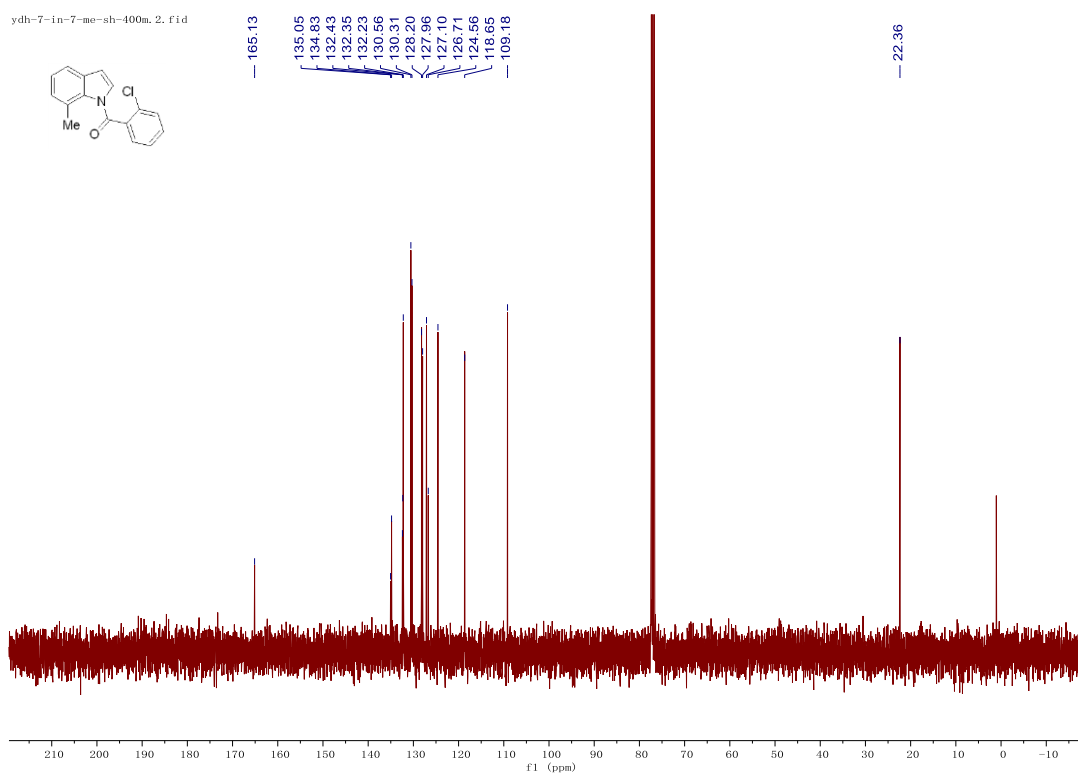

# <sup>1</sup>H NMR of S11

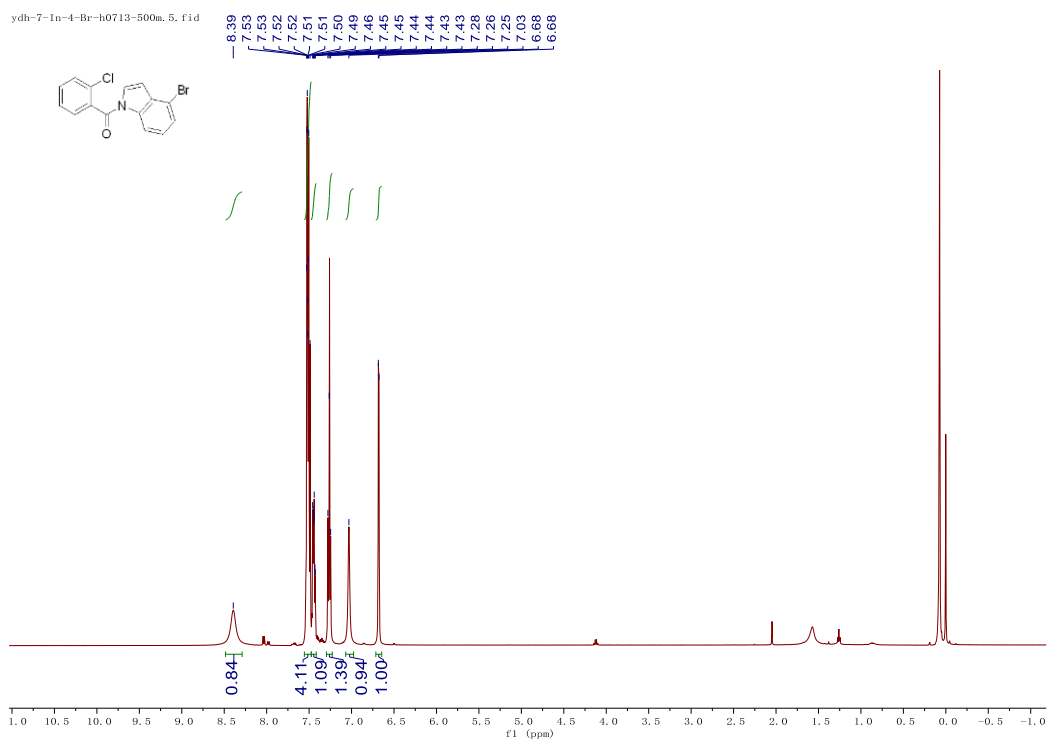

# <sup>13</sup>C NMR of S11

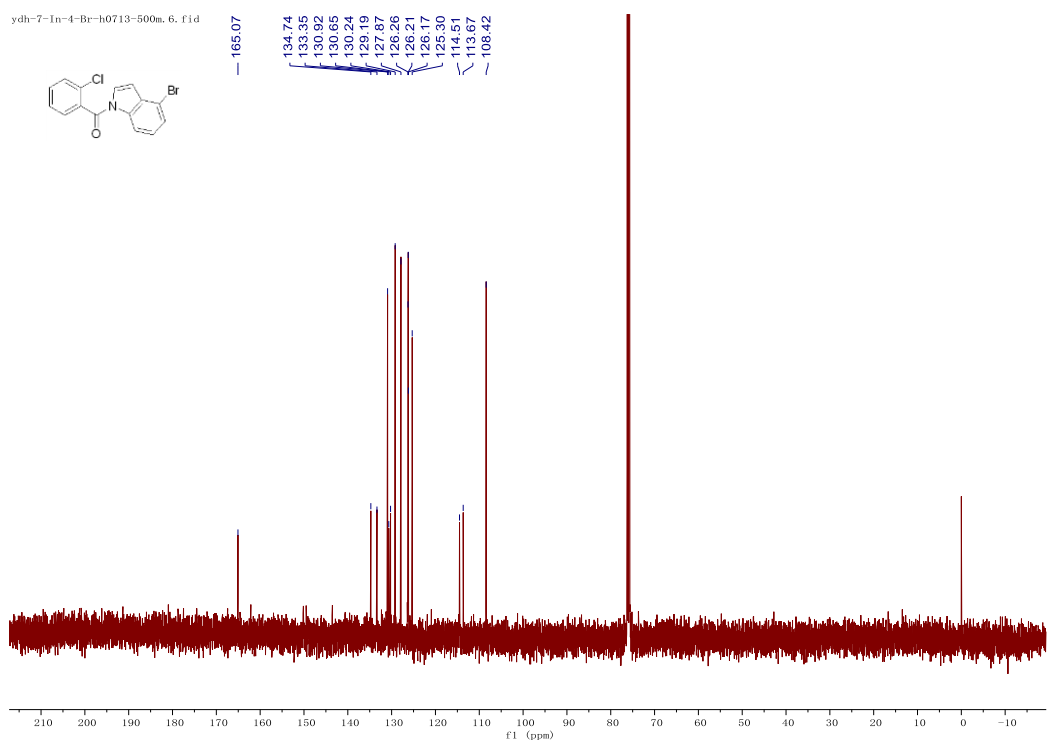

# <sup>1</sup>H NMR of S12

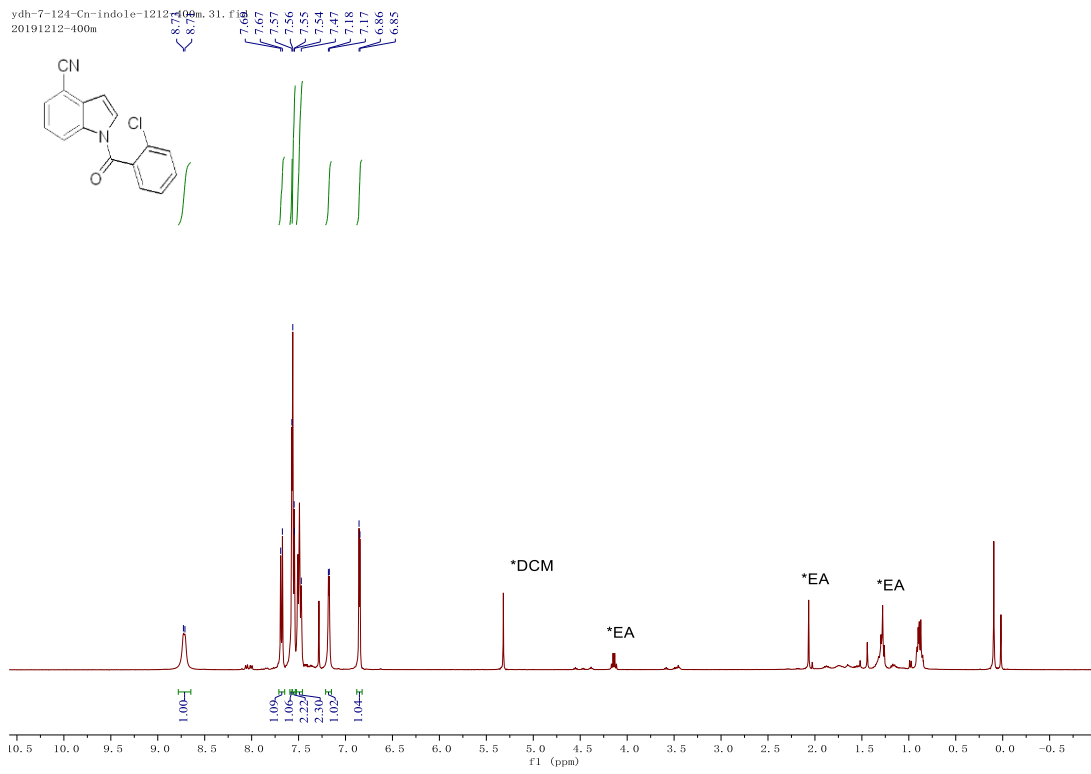

# <sup>13</sup>C NMR of S12

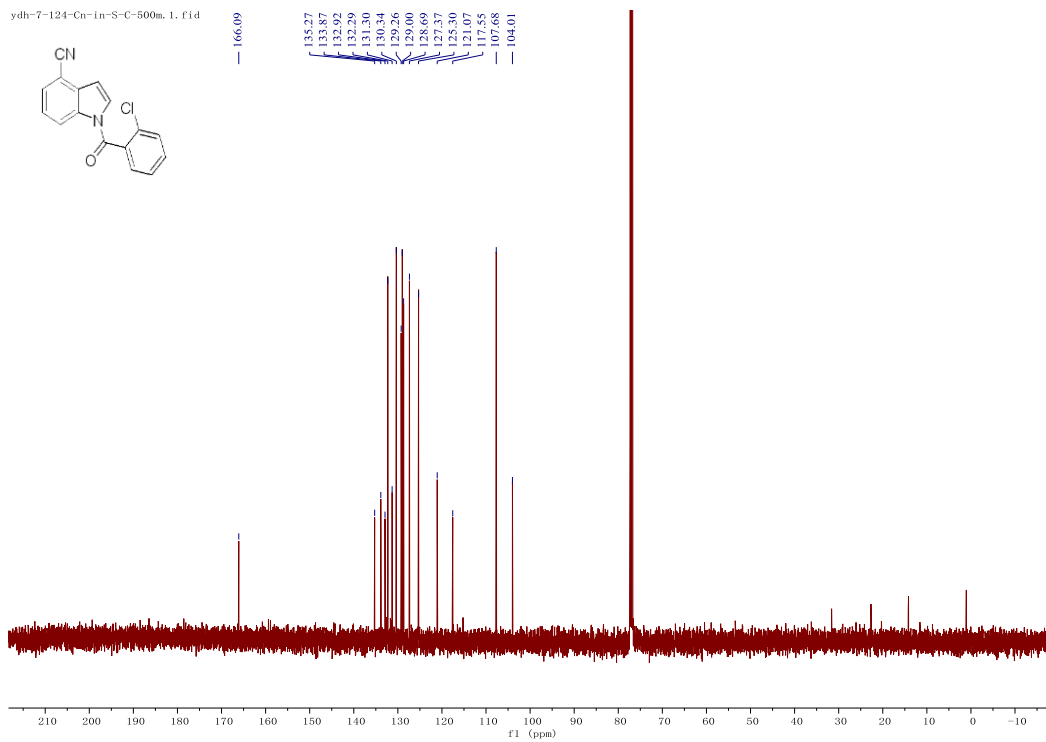

# <sup>1</sup>H NMR of S13

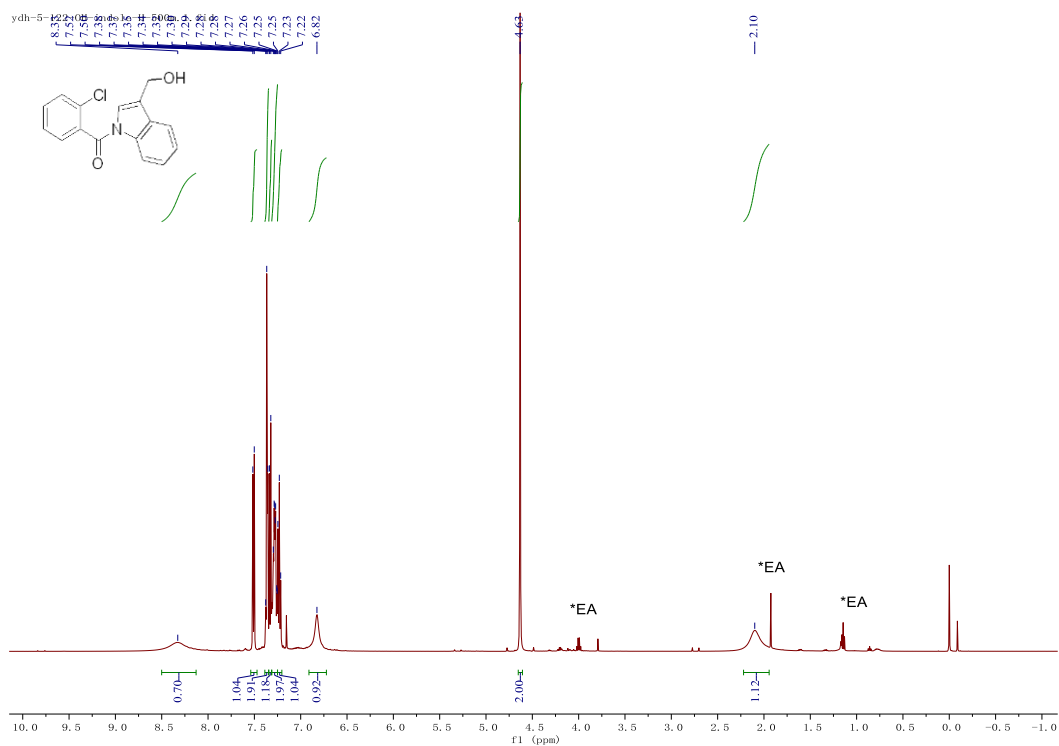

# <sup>13</sup>C NMR of S13

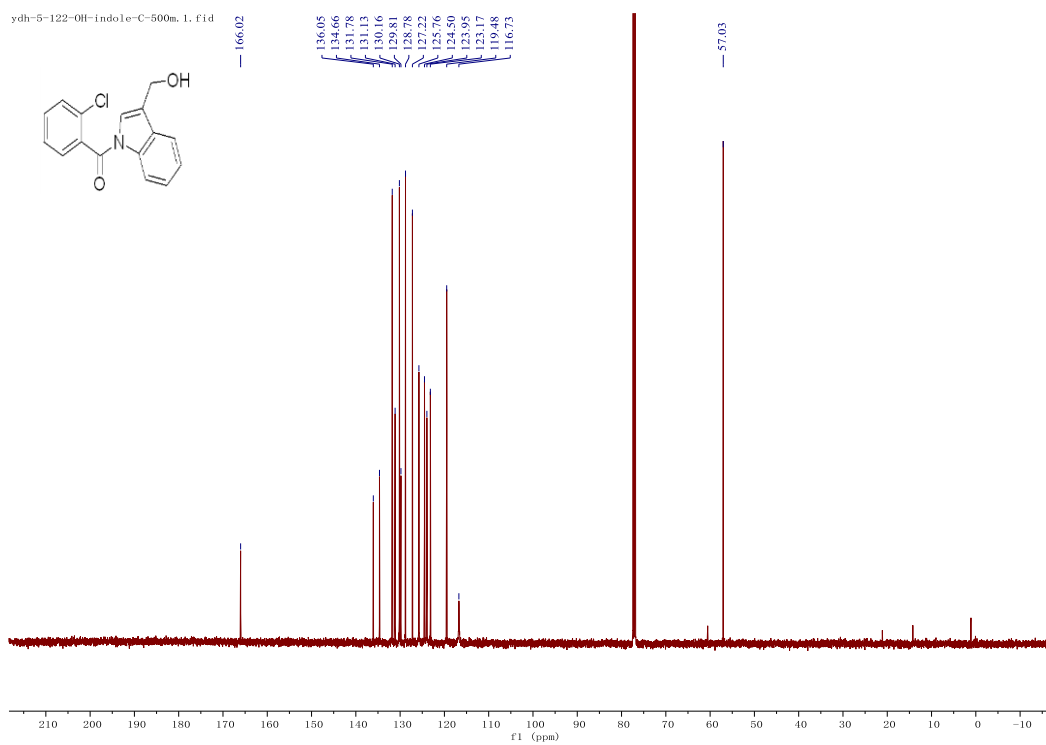



# <sup>1</sup>H NMR of S14

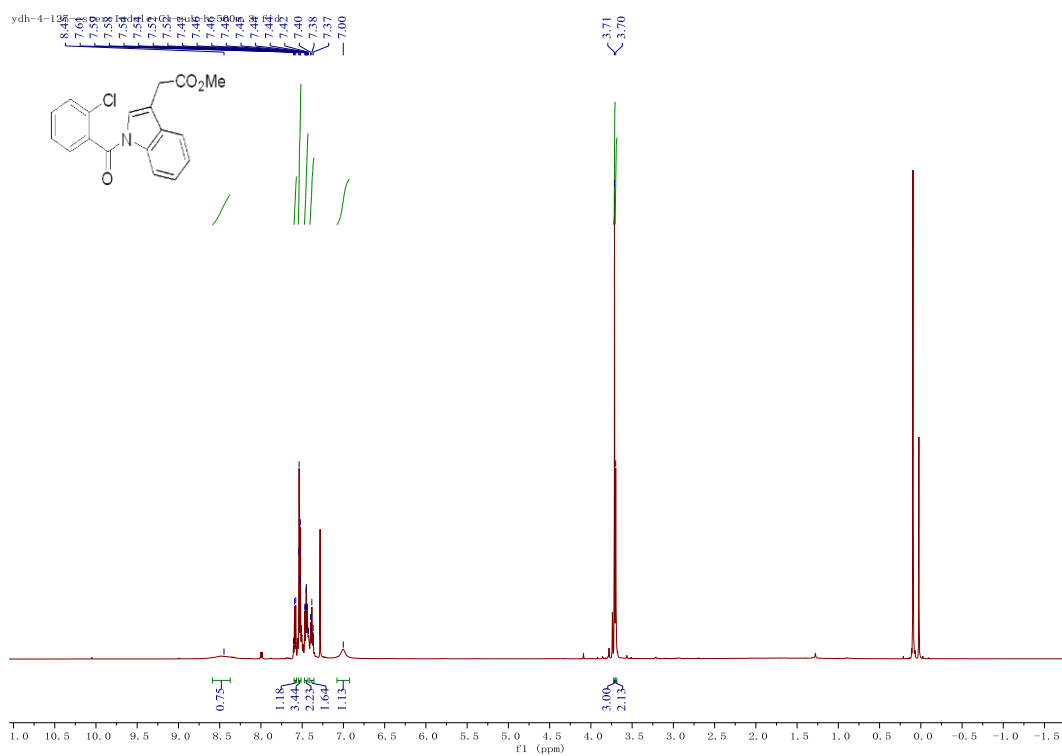

# <sup>13</sup>C NMR of S14

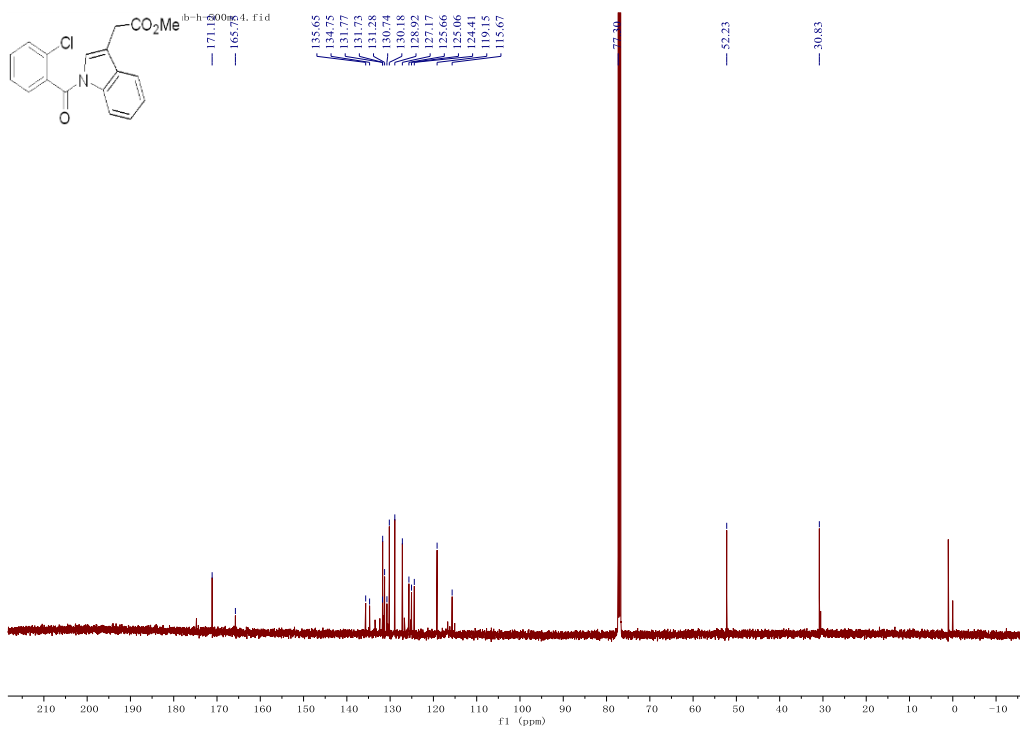

# <sup>1</sup>H NMR of S15

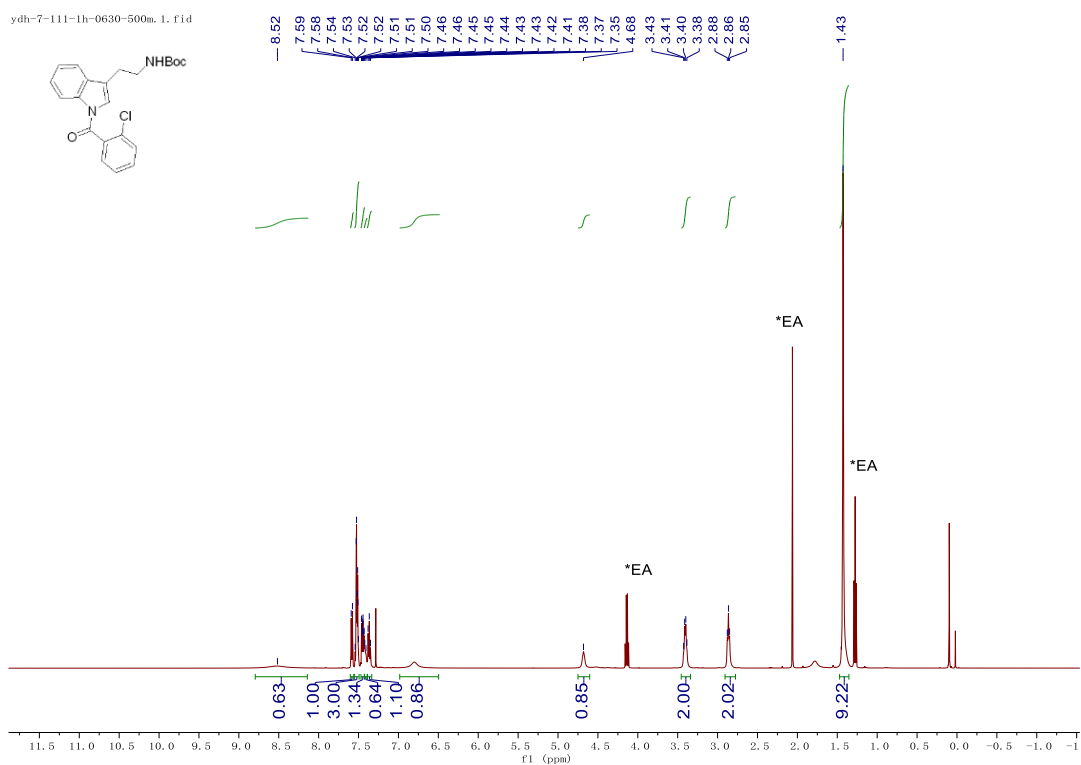

# <sup>13</sup>C NMR of S15

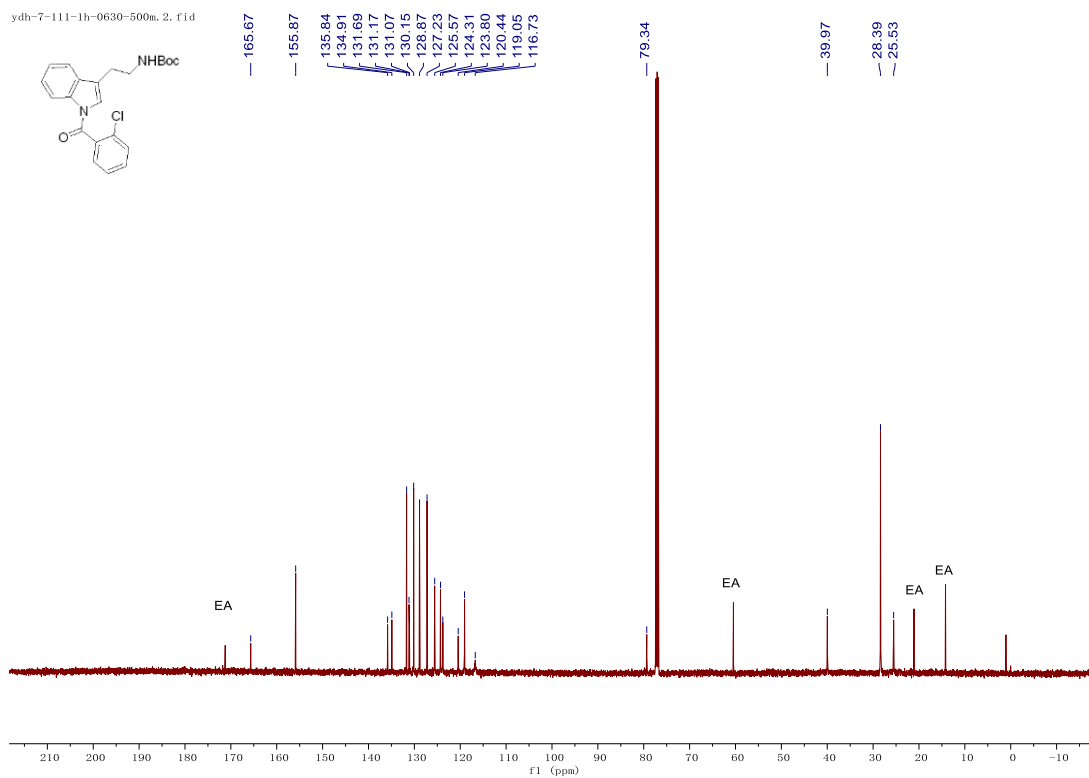

# <sup>1</sup>H NMR of S16

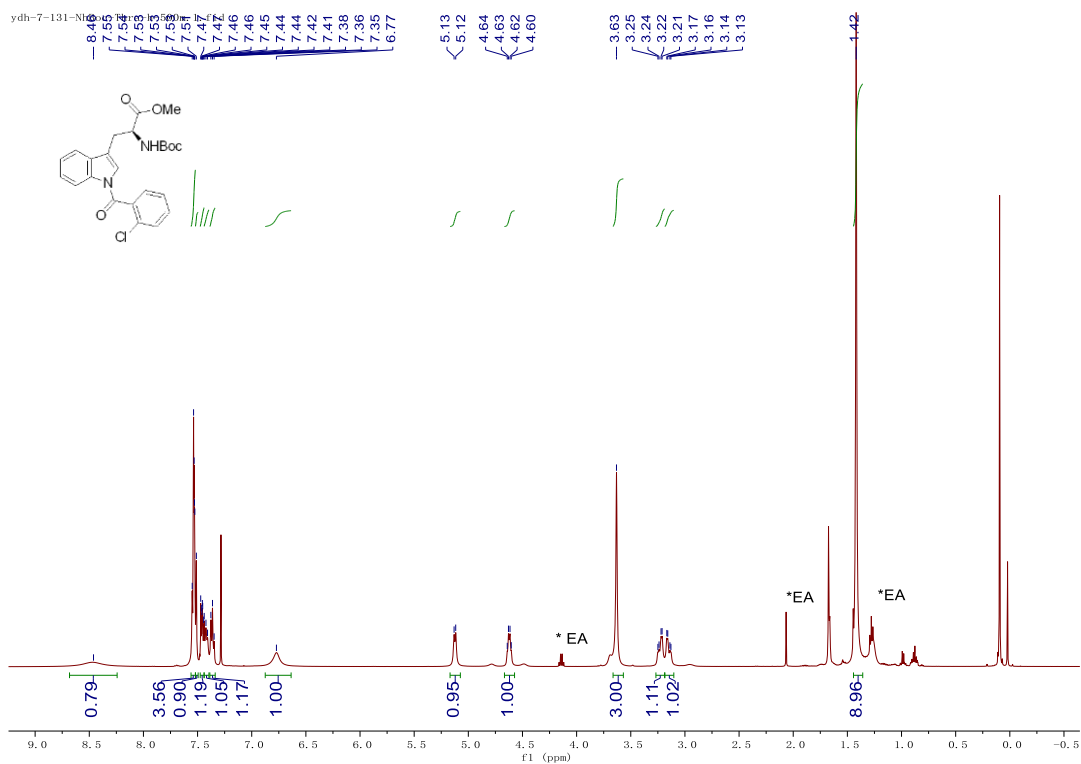

# <sup>13</sup>C NMR of S16

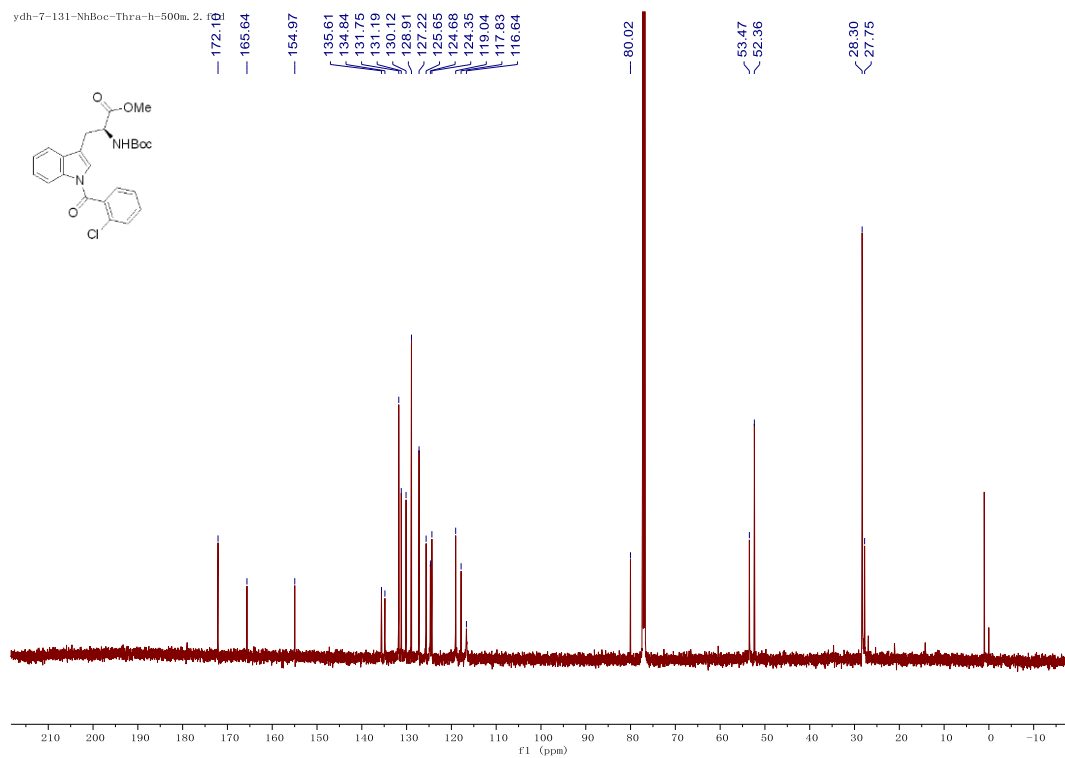

# <sup>1</sup>H NMR of S17

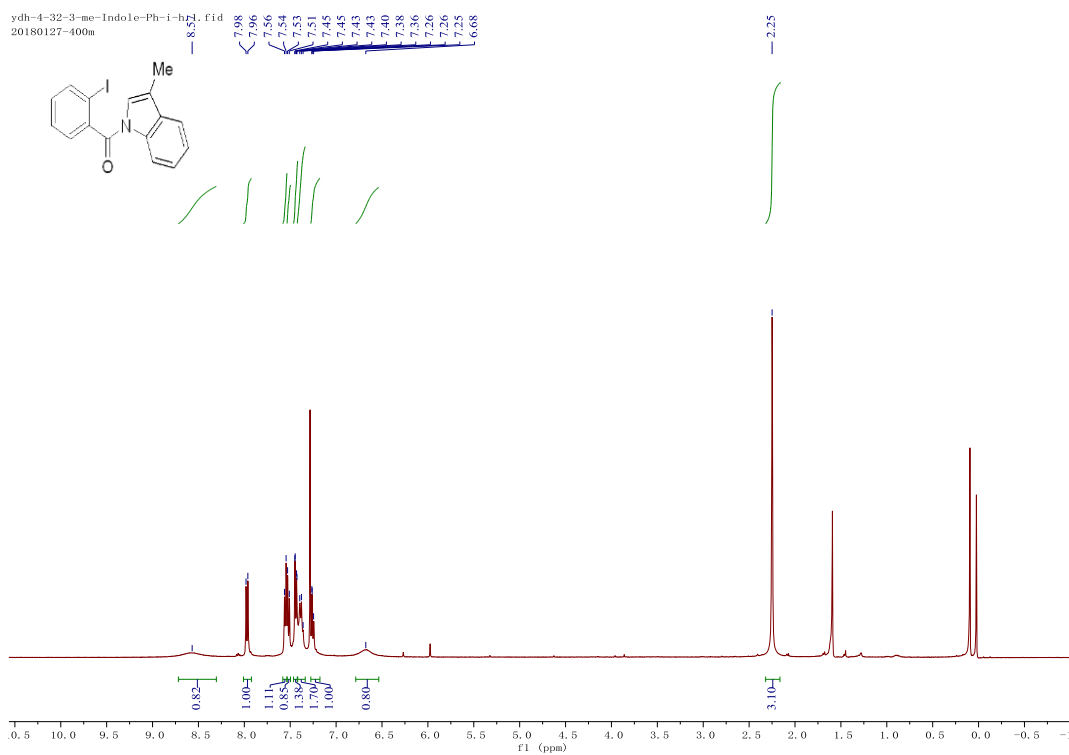

# <sup>1</sup>H NMR of S18

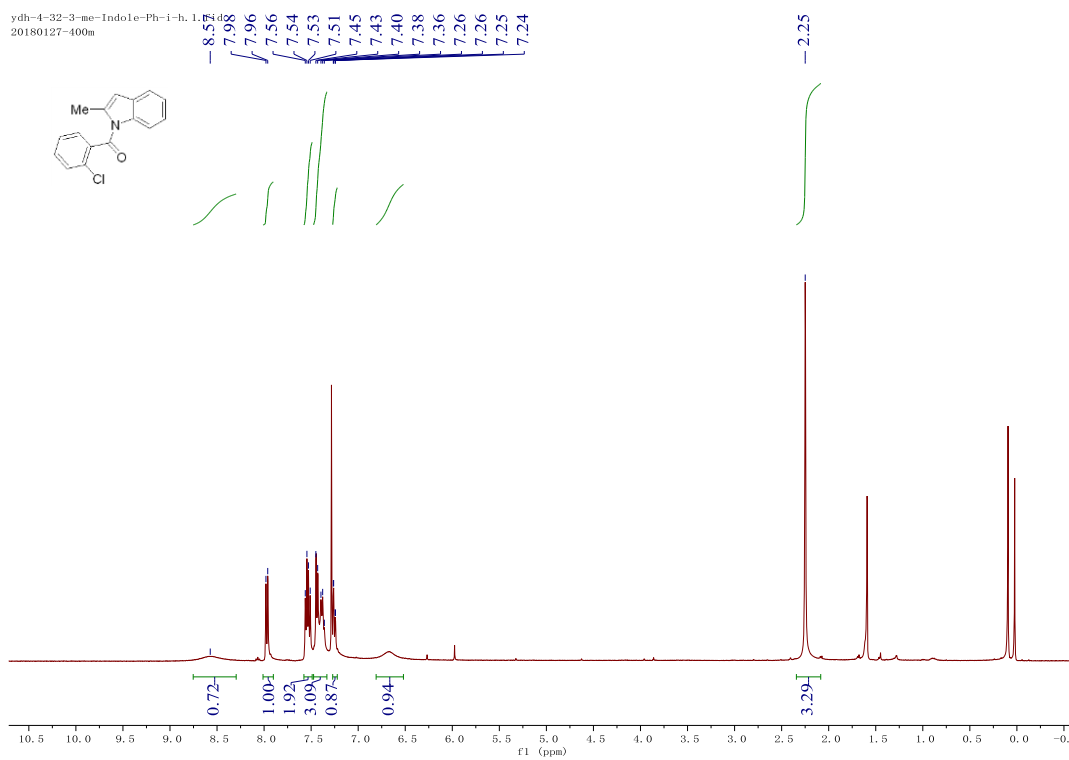

# <sup>1</sup>H NMR of S19

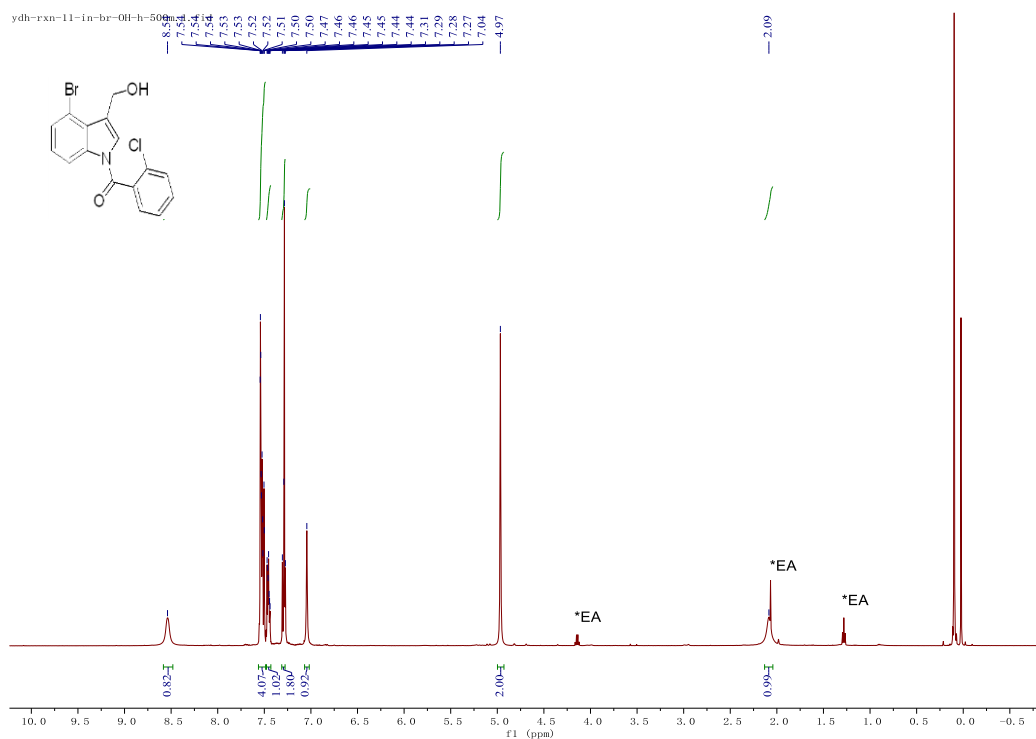

# <sup>13</sup>C NMR of S19

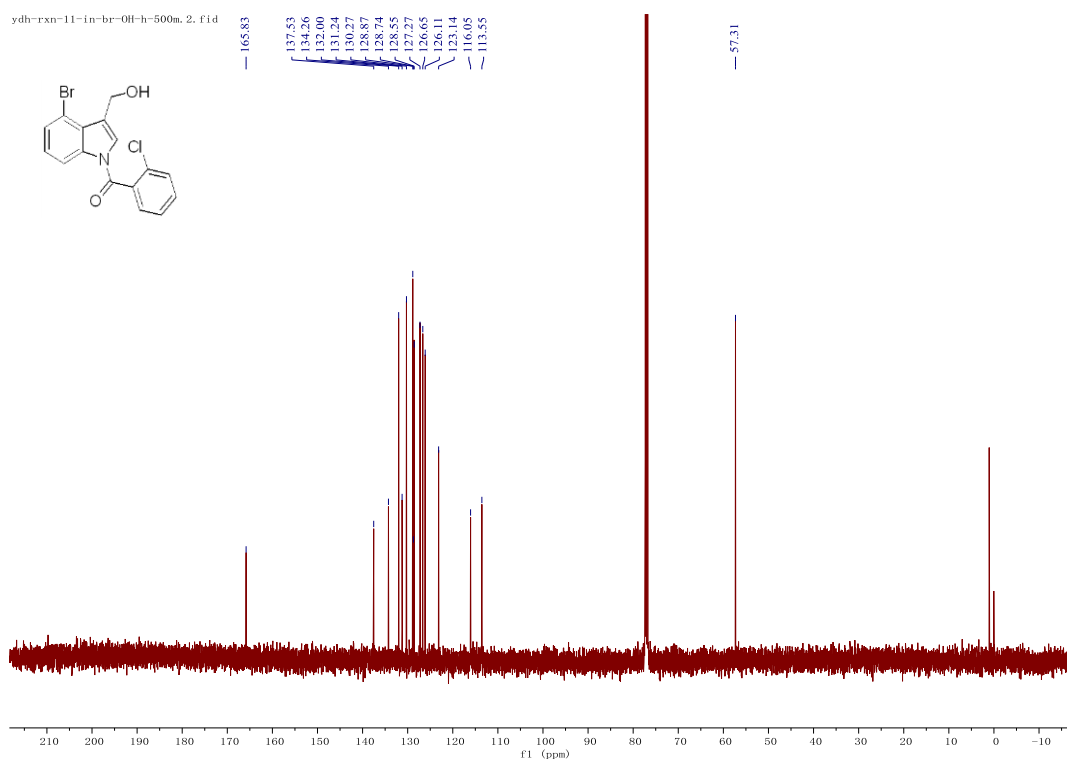

# <sup>1</sup>H NMR of S20

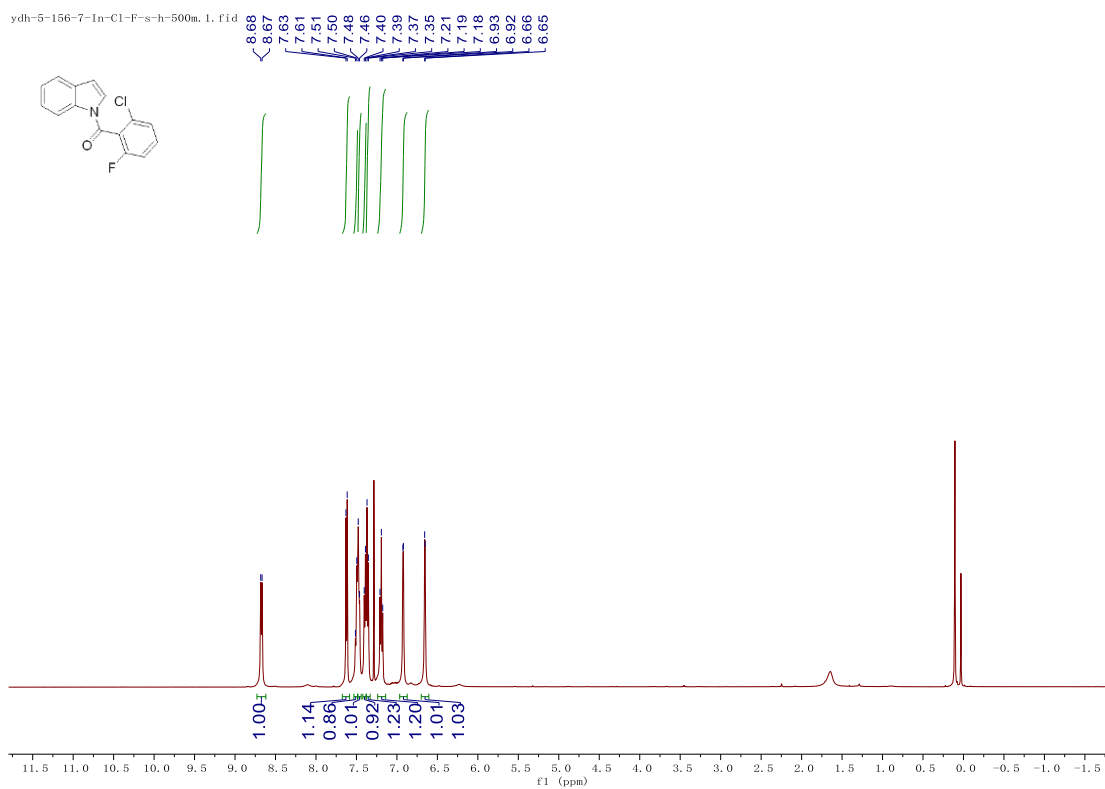

# <sup>19</sup>F NMR of S20

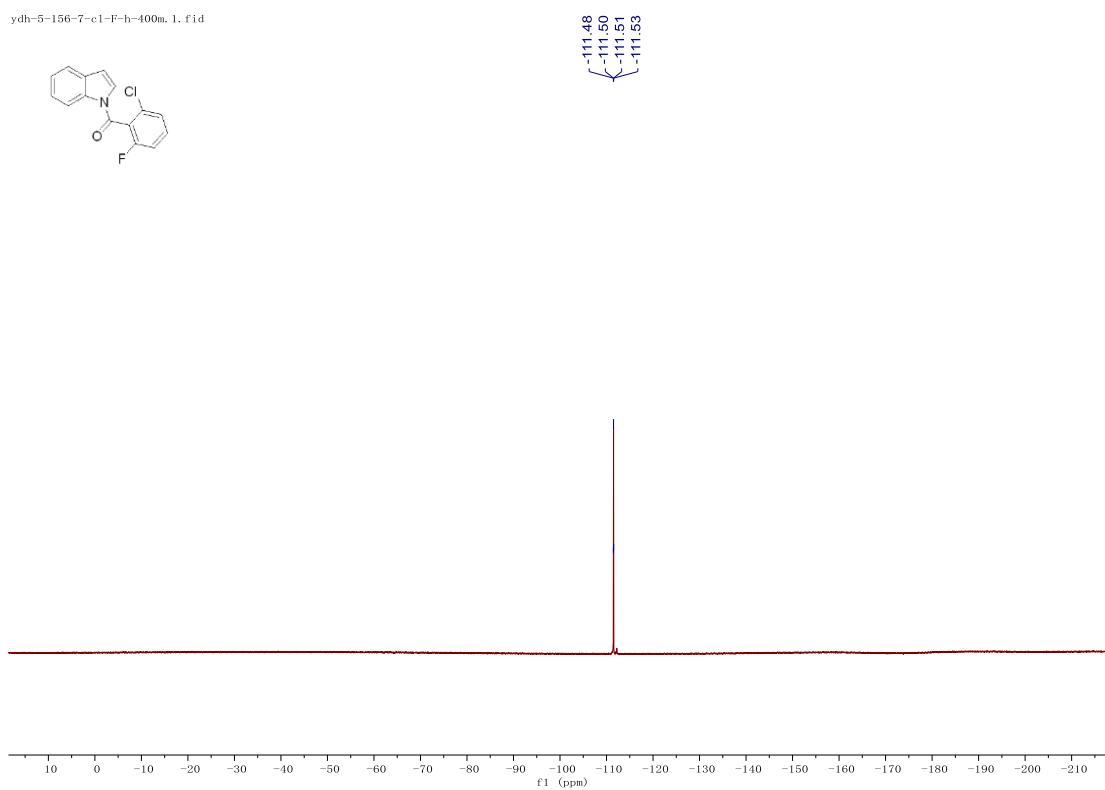

### <sup>13</sup>C NMR of S20

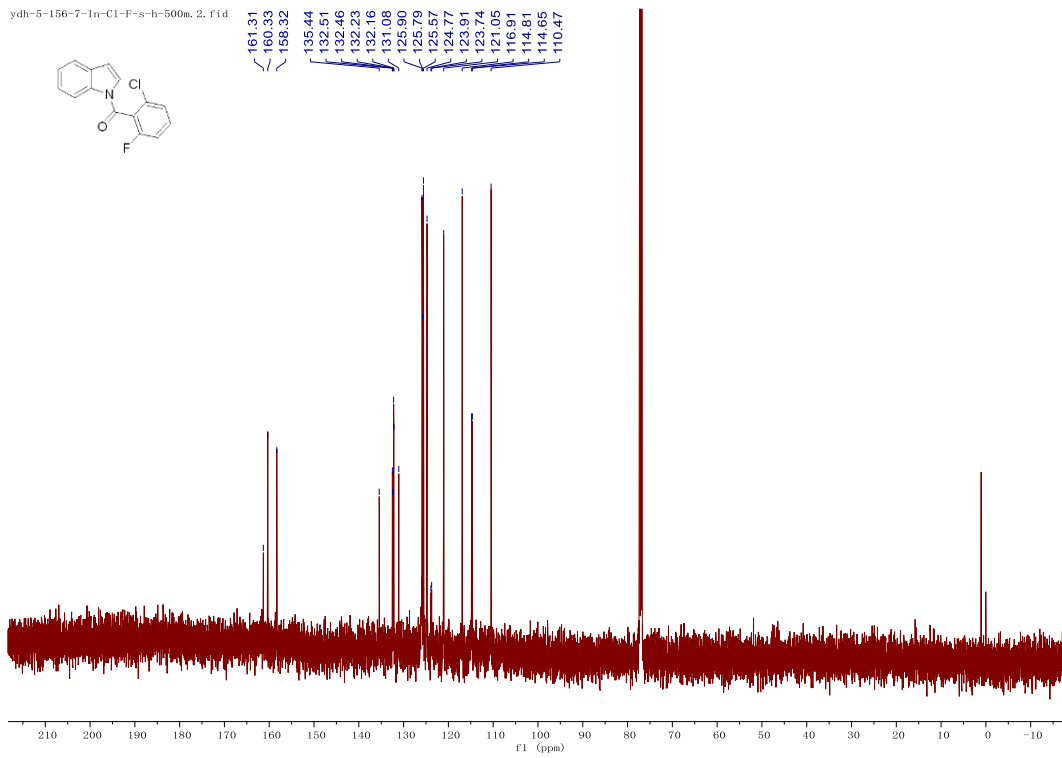

### <sup>1</sup>H NMR of S21

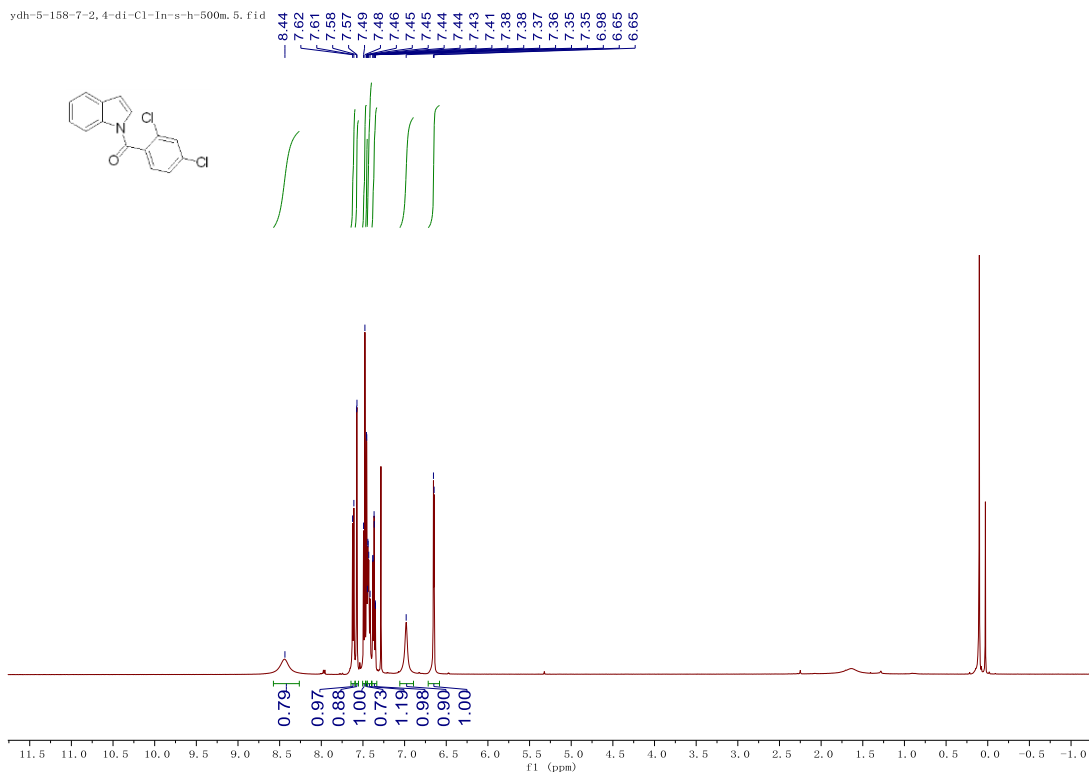

# <sup>13</sup>C NMR of S21

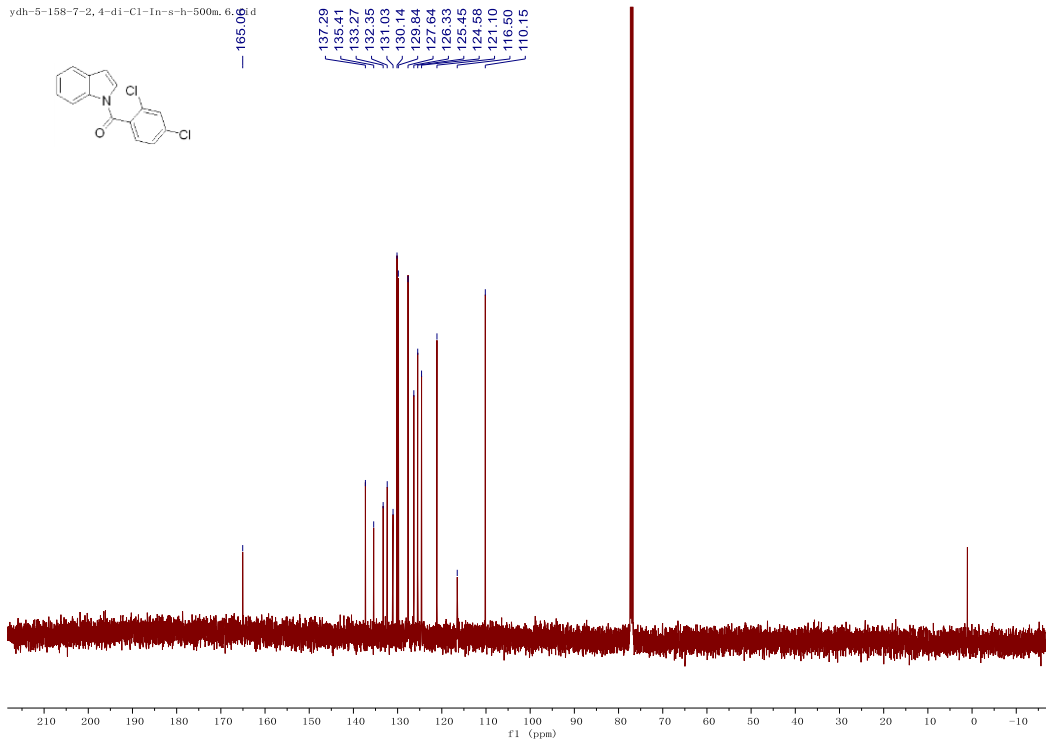

# <sup>1</sup>H NMR of S21'

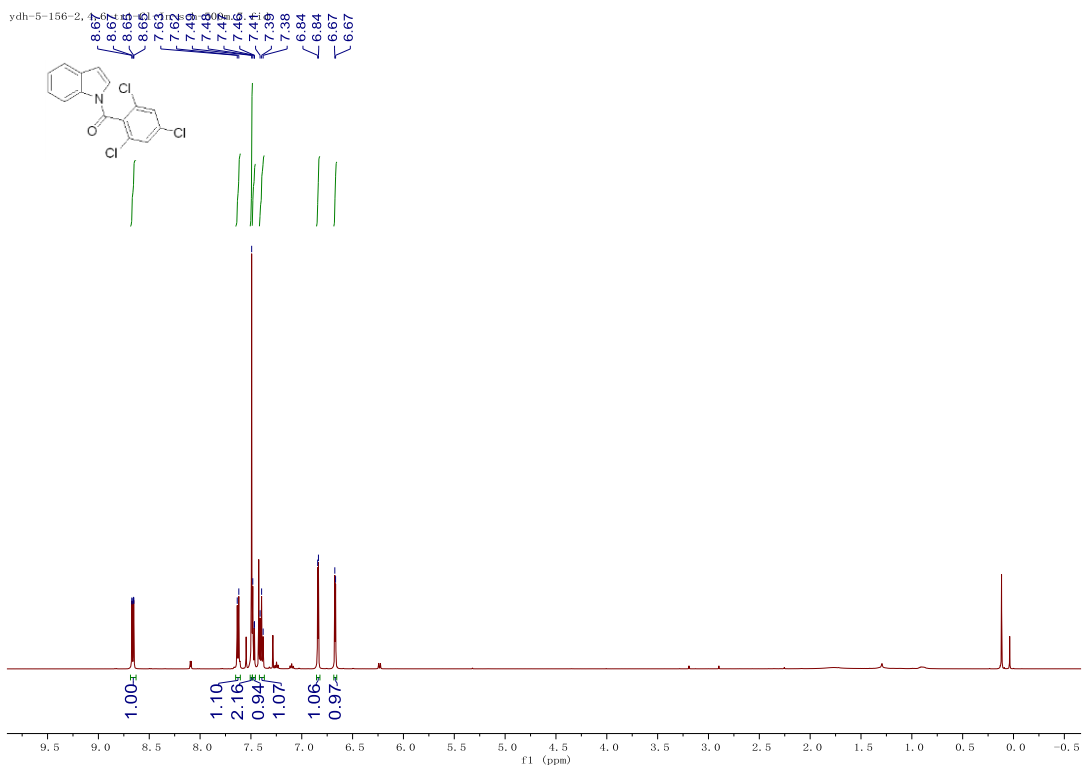



### <sup>13</sup>C NMR of S21'

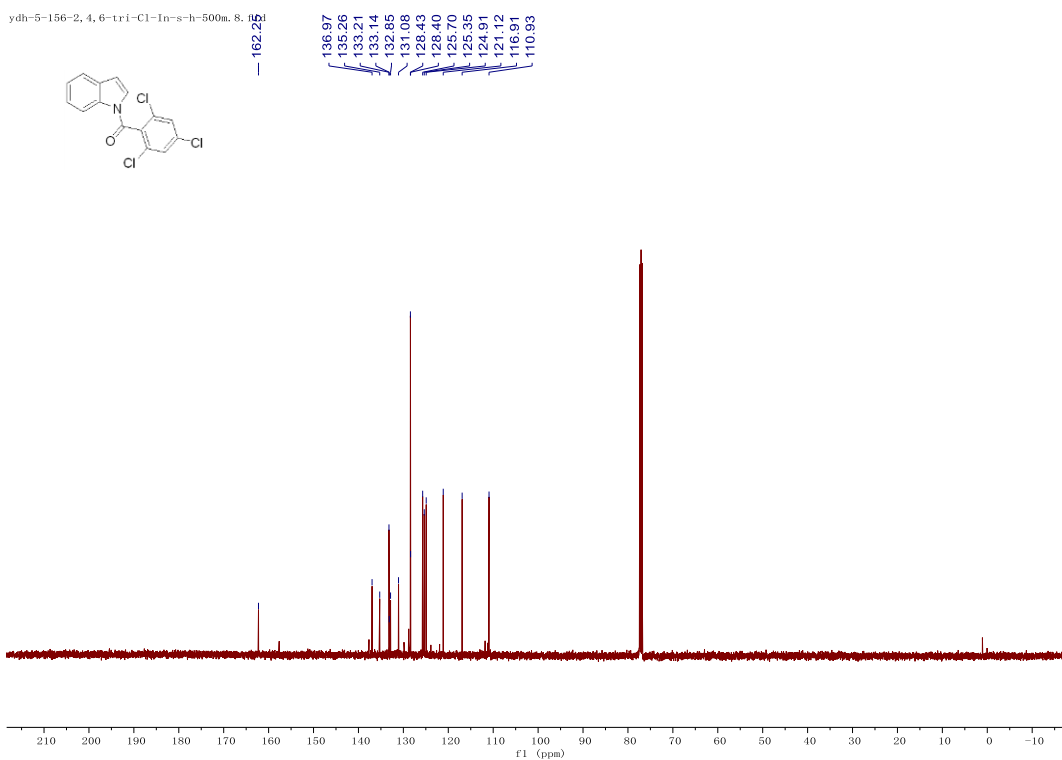

### <sup>1</sup>H NMR of S22

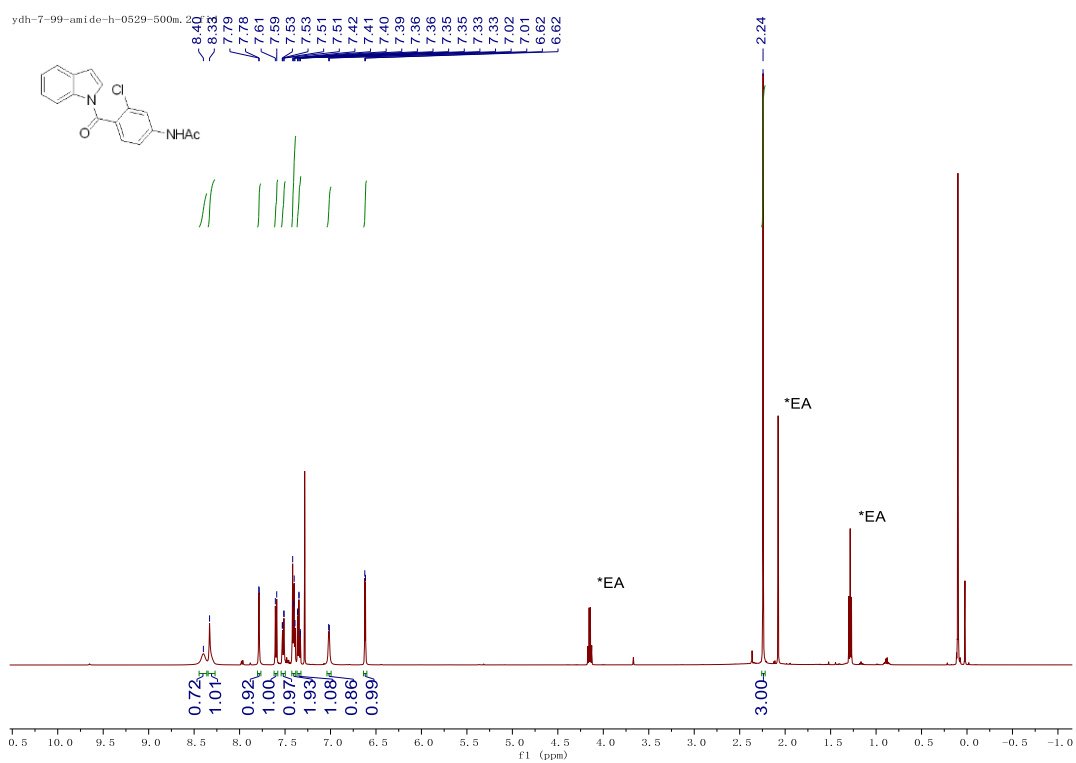

# <sup>13</sup>C NMR of S22

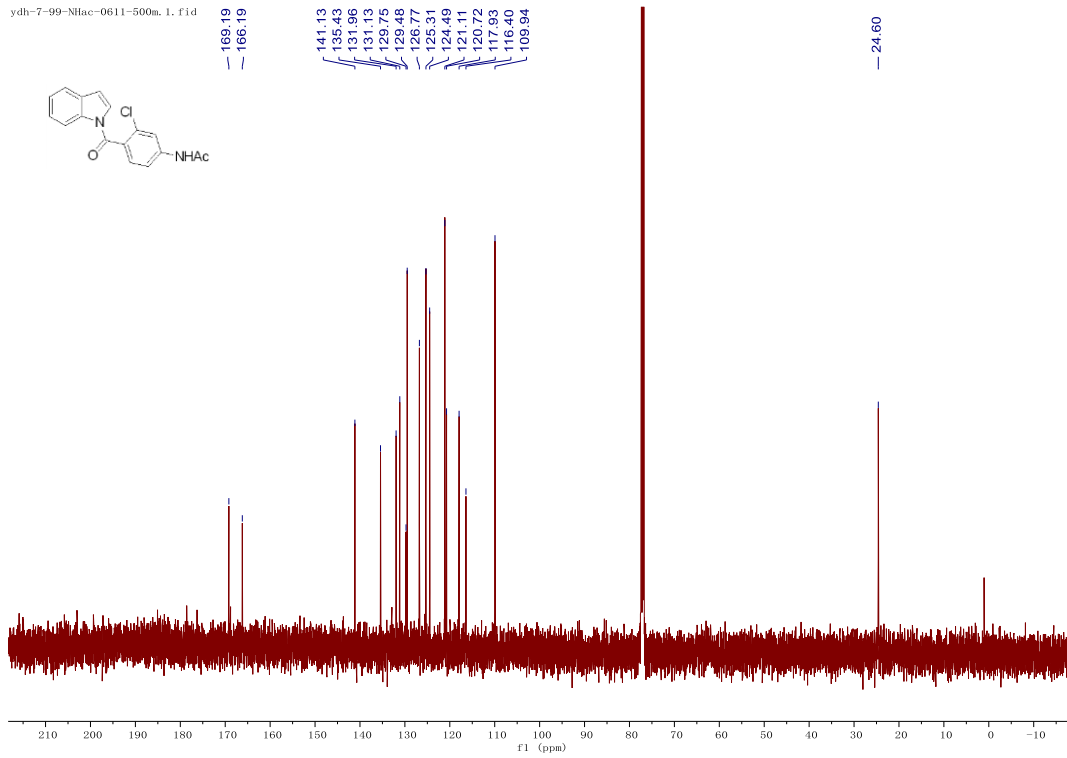

# <sup>1</sup>H NMR of S23

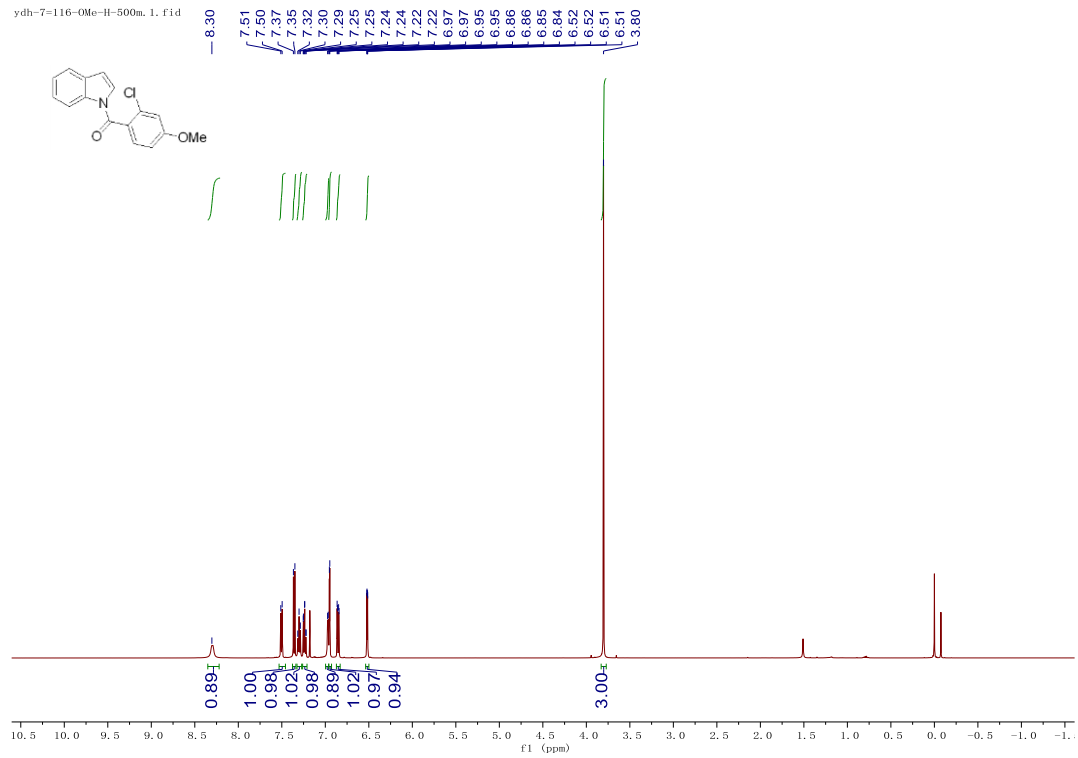

### <sup>13</sup>C NMR of S23

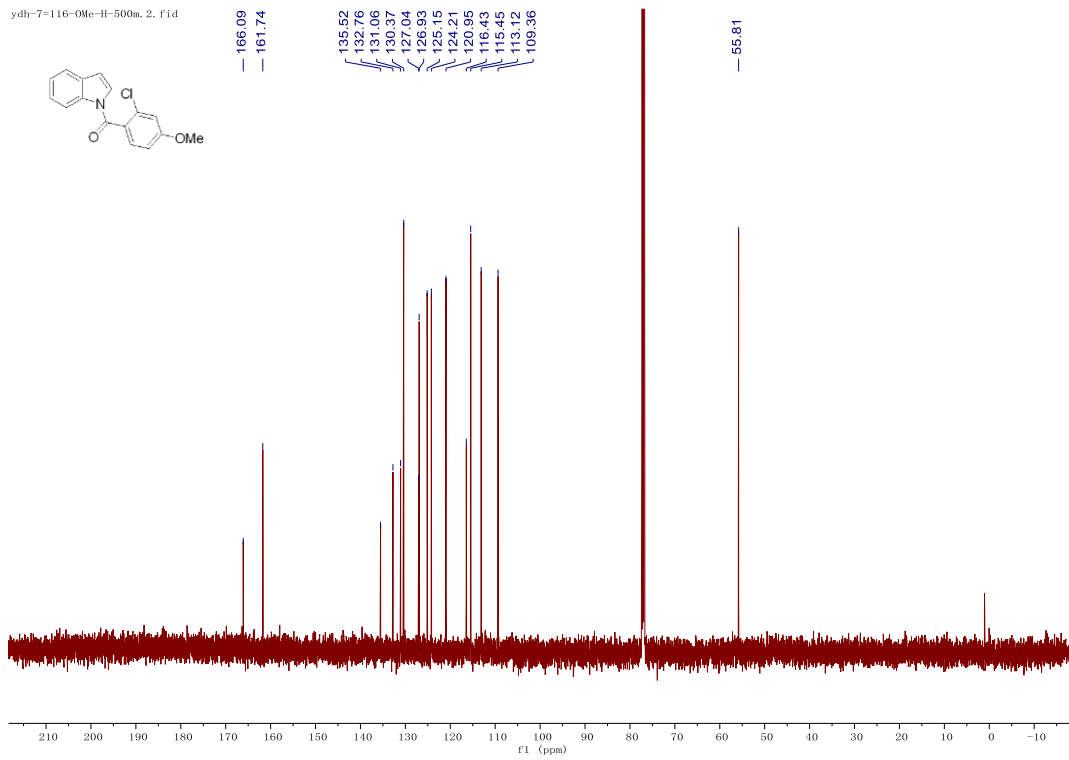

### <sup>1</sup>H NMR of S24

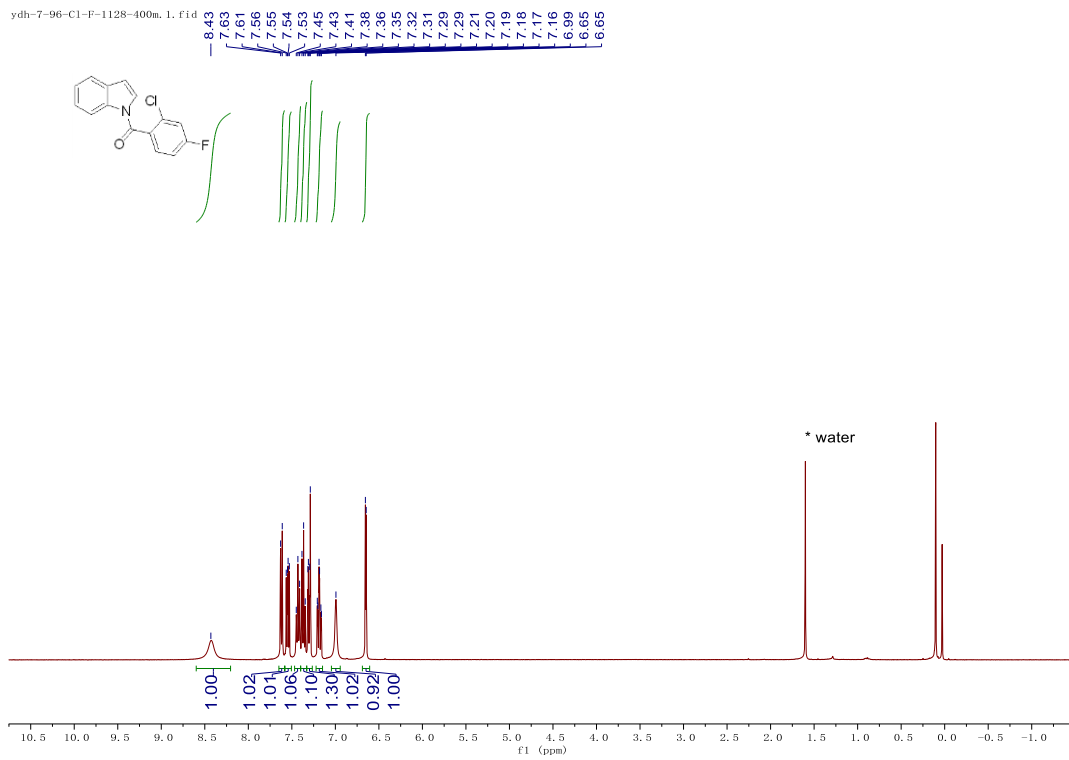

# <sup>19</sup>F NMR of S24

ydh-7-96-F-F-400m.2.fid

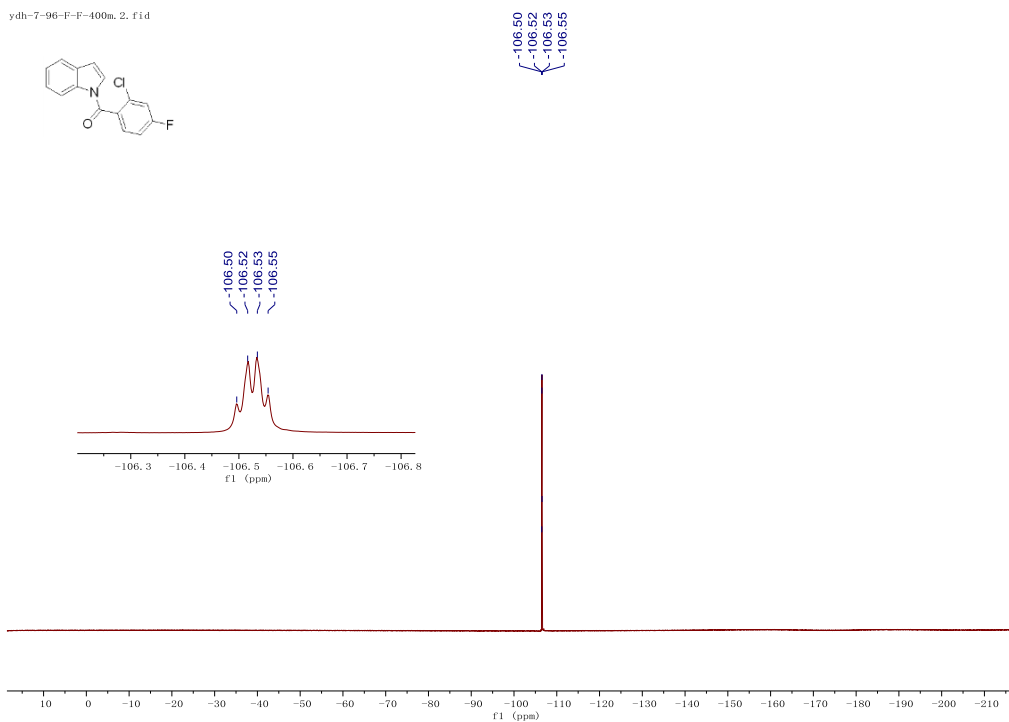

# <sup>13</sup>C NMR of S24

ydh-7-96-F-sub-h-500m.1.f1

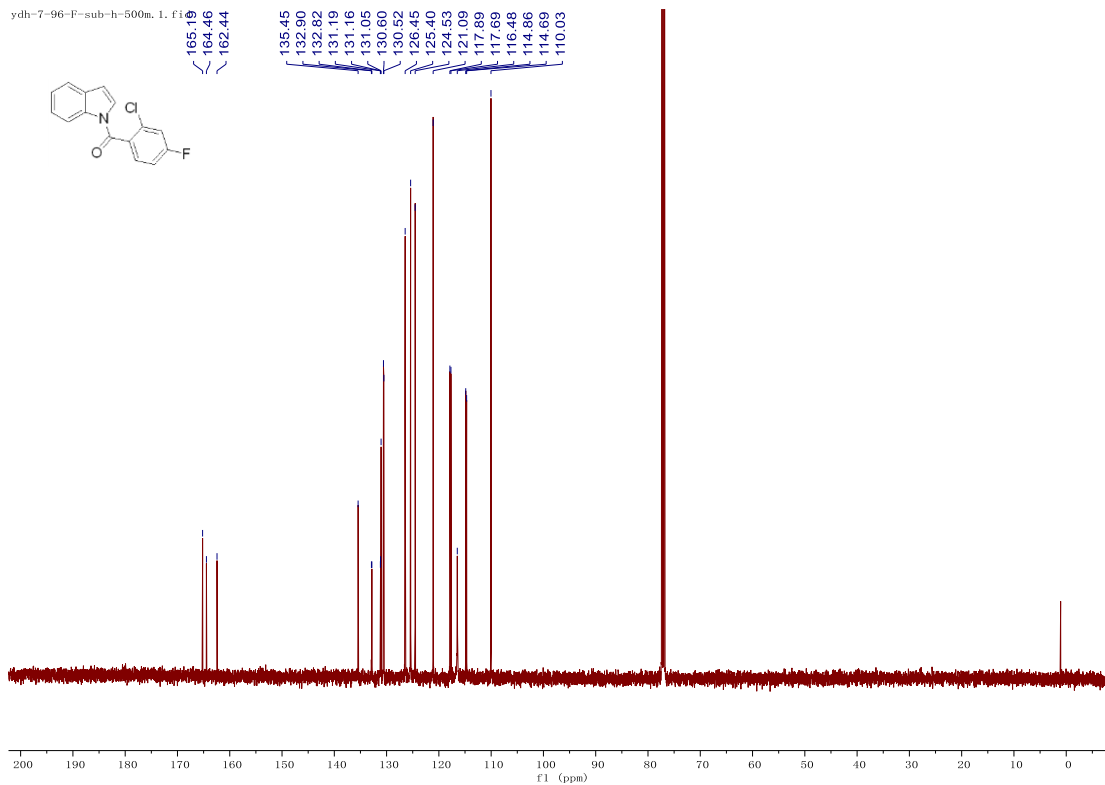

# <sup>1</sup>H NMR of S25

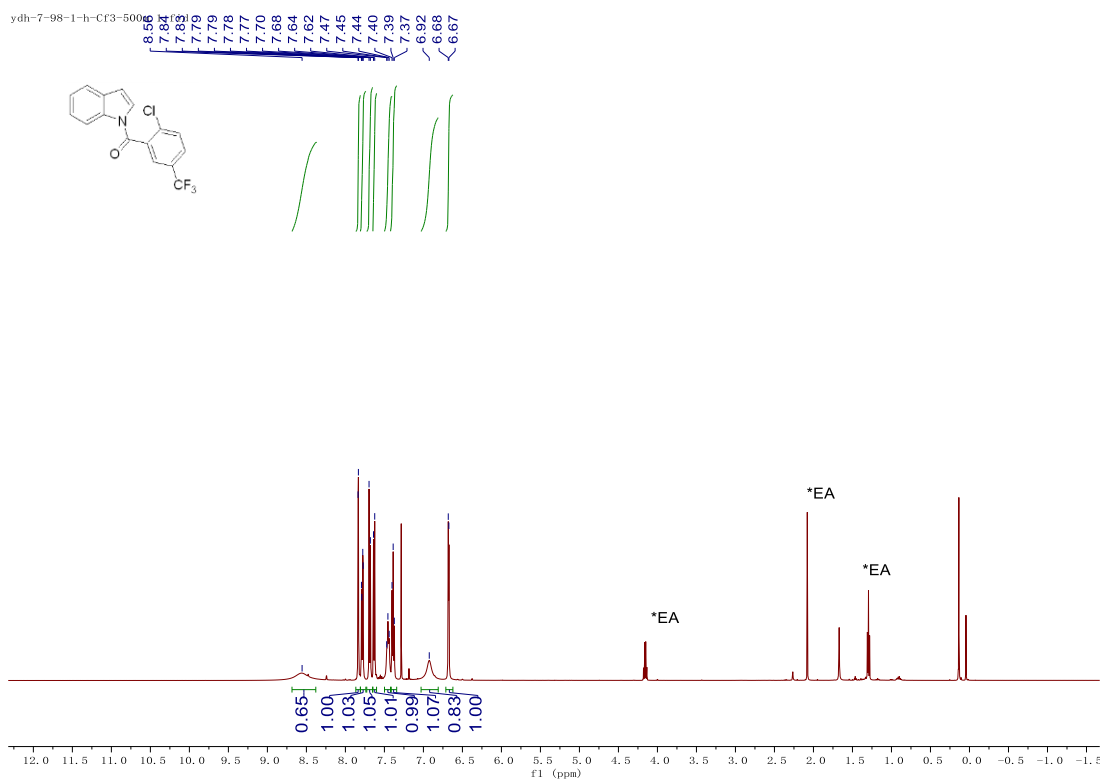

# <sup>19</sup>F NMR of S25

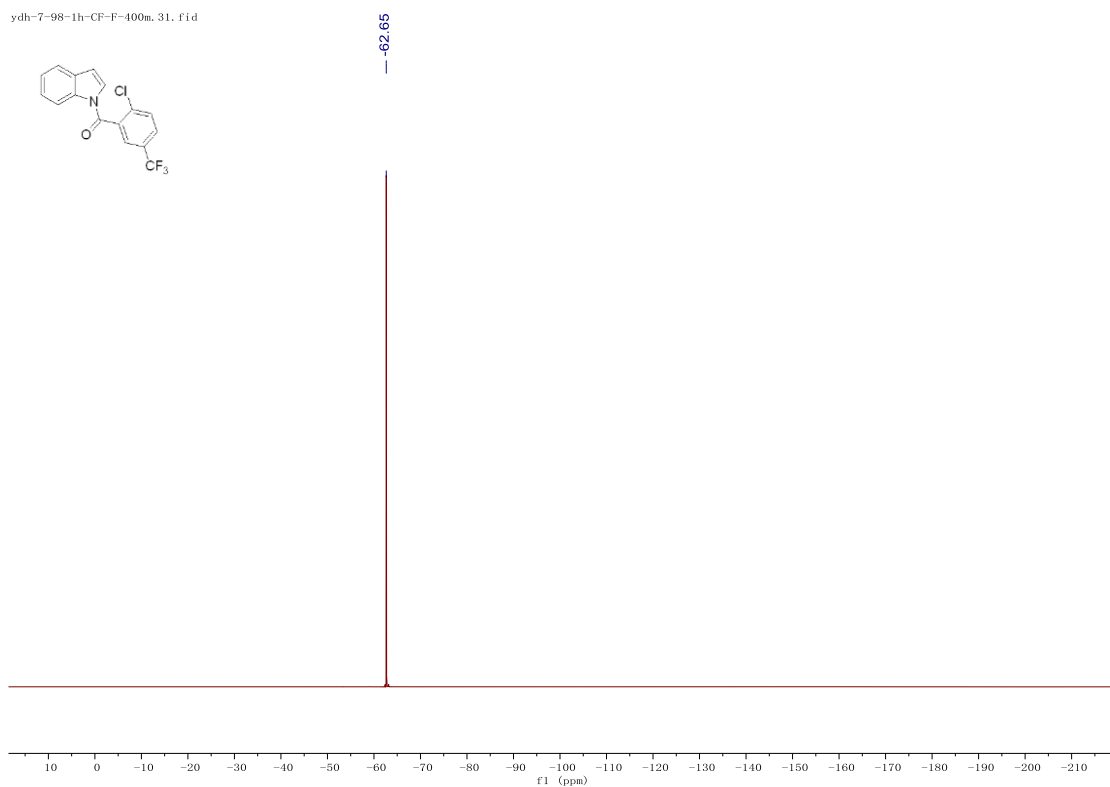

### <sup>13</sup>C NMR of S25

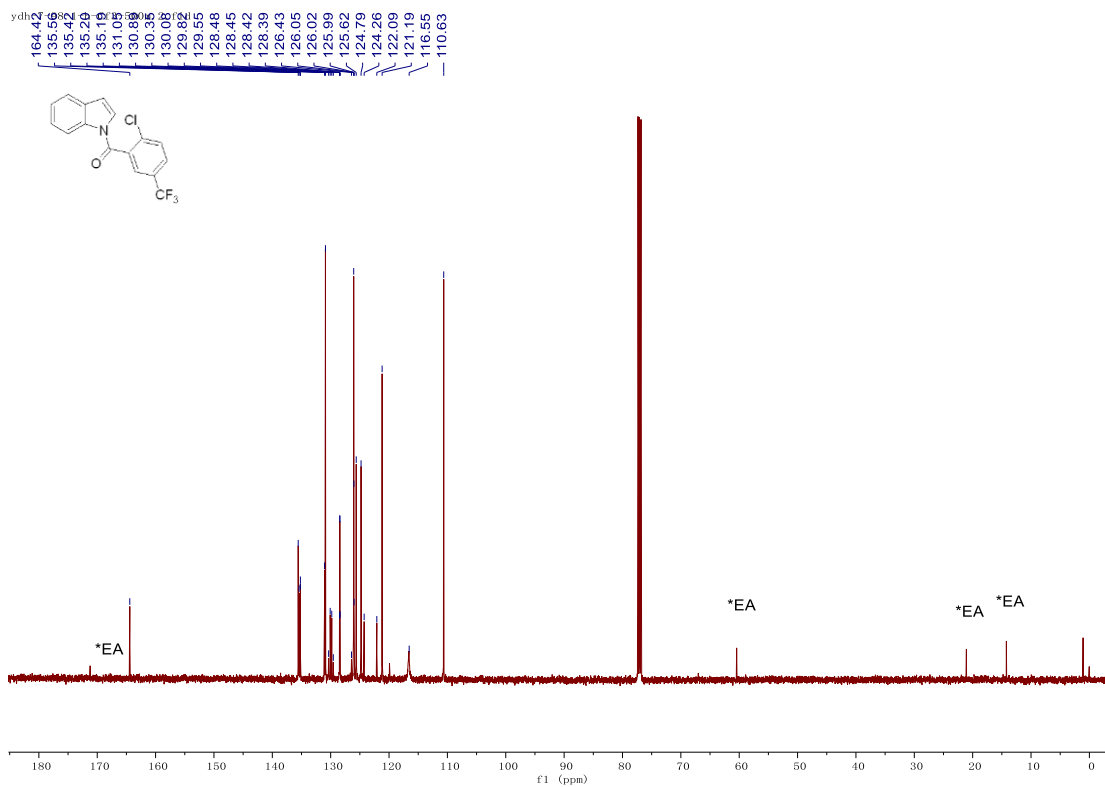

### <sup>1</sup>H NMR of S26

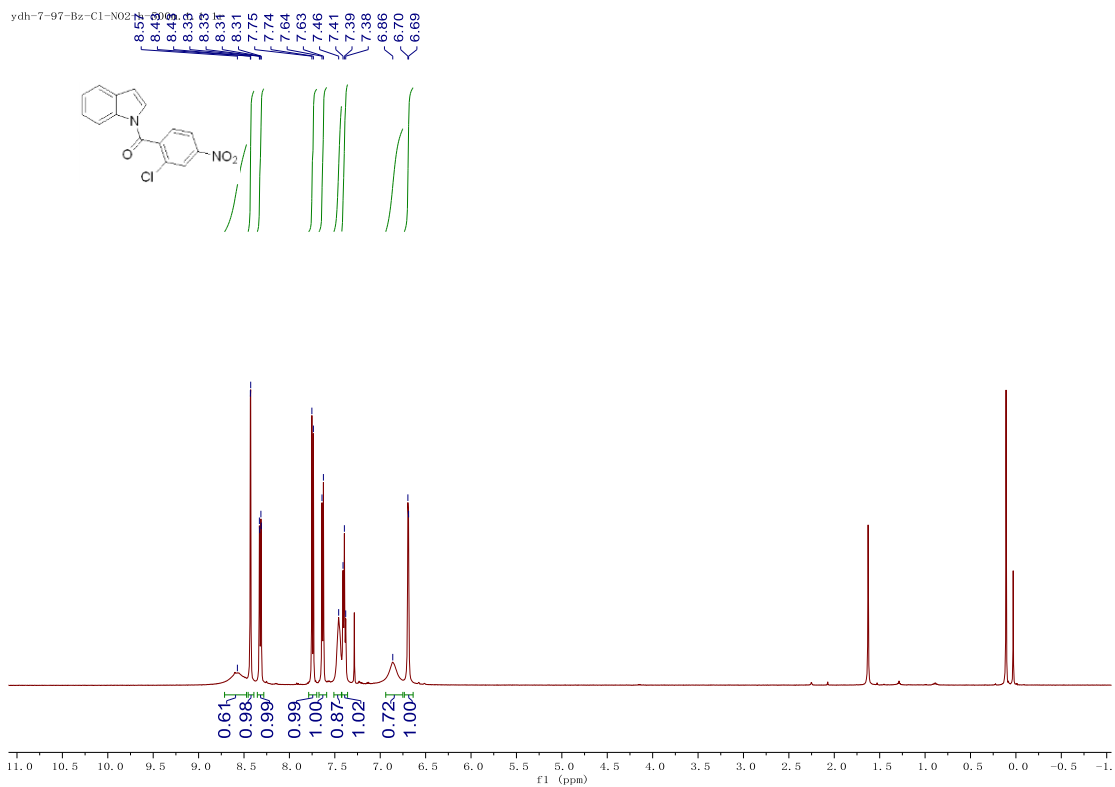



### <sup>13</sup>C NMR of S27

ydh-7-141-n3-ind-1-h-400m. 3. f1d

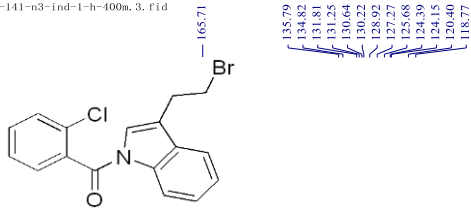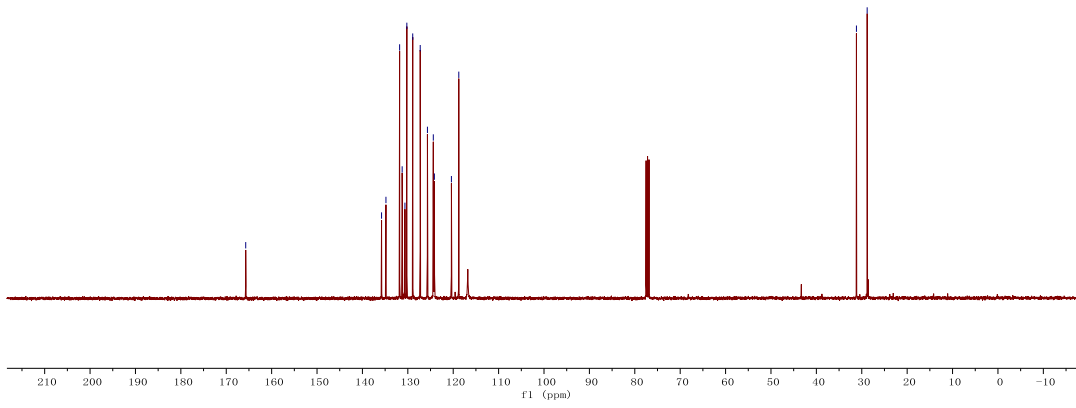

### <sup>1</sup>H NMR of S28

ydh-7-In-5-NO2-h-500m. 3. f1d

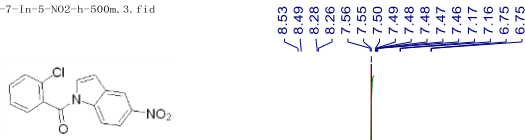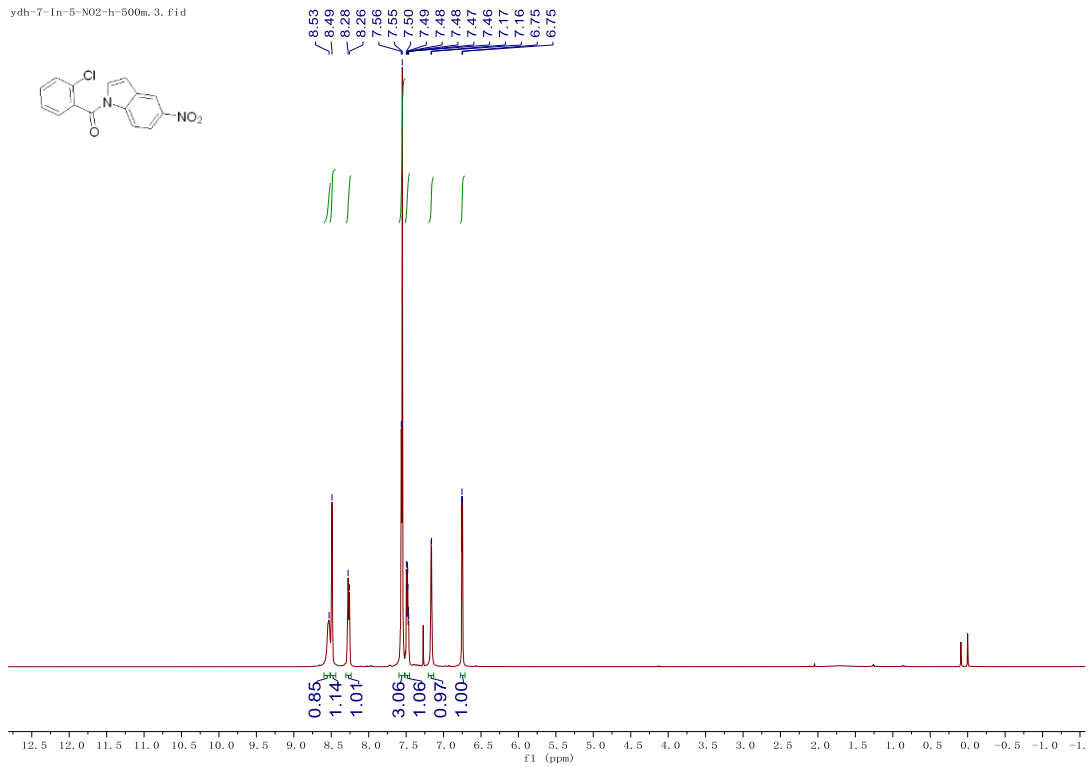



# <sup>13</sup>C NMR of S28

ydh-7-In-5-NO2-h-500m. 4. fid

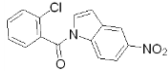

166.10  
144.70  
138.41  
133.74  
132.40  
131.27  
131.06  
130.35  
129.56  
127.44  
120.49  
117.17  
116.62  
109.89

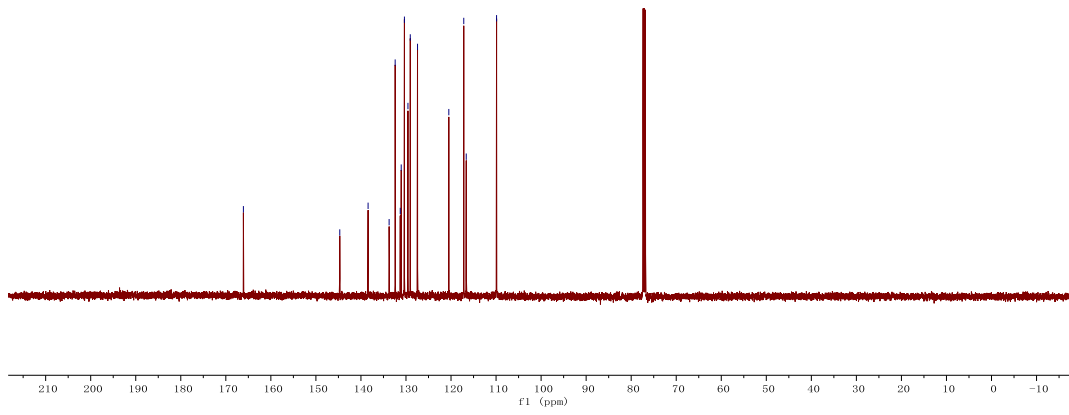

# <sup>1</sup>H NMR of S29

ydh-7-In-5-NO2-h-500m. 4. fid  
8.25  
8.23  
8.21  
8.21  
7.87  
7.85  
7.85  
7.79  
7.69  
7.59  
7.53  
7.48  
7.46  
7.43  
7.41  
7.18  
7.17  
7.16  
6.15  
6.65

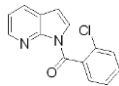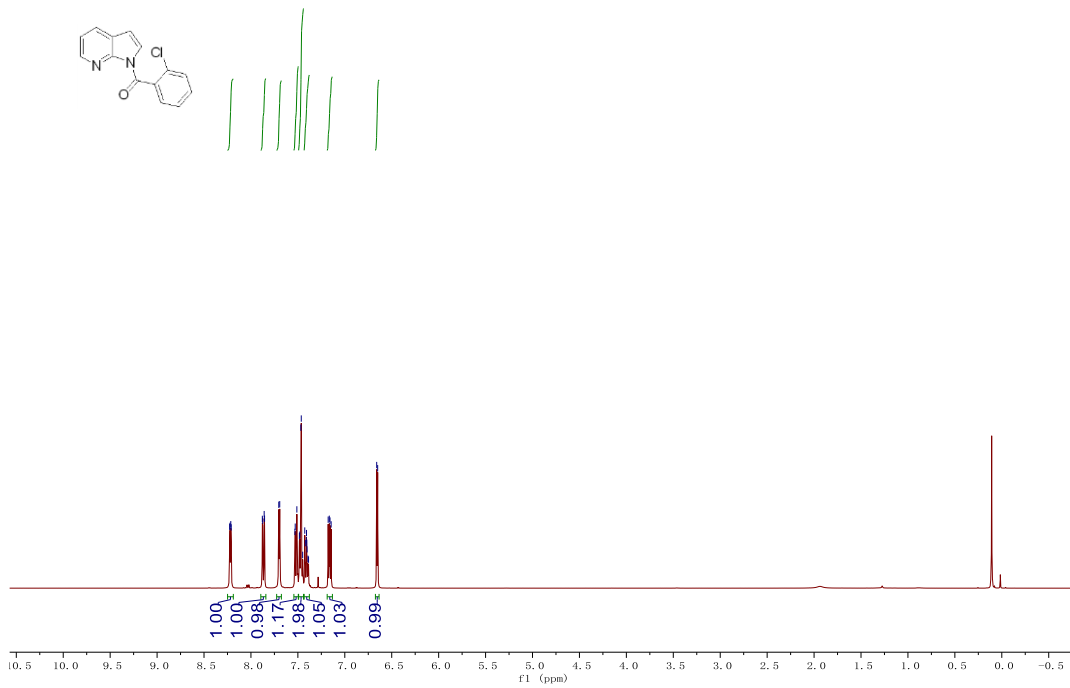

### <sup>13</sup>C NMR of S29

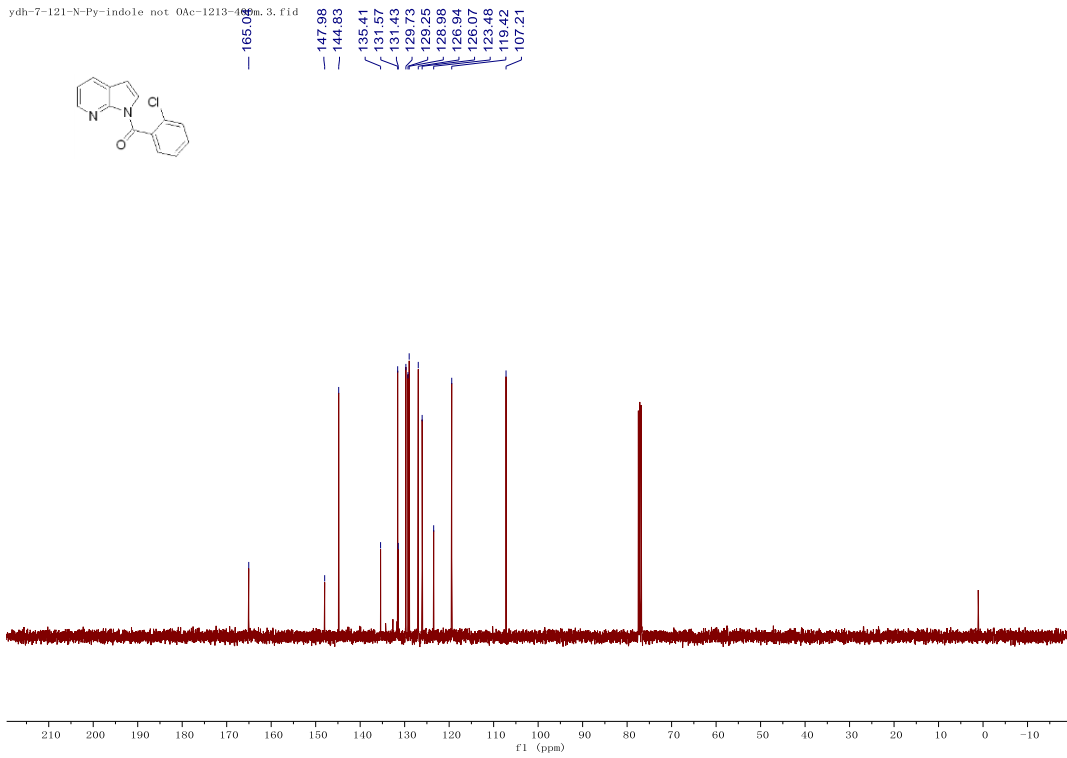

### <sup>1</sup>H NMR of S30

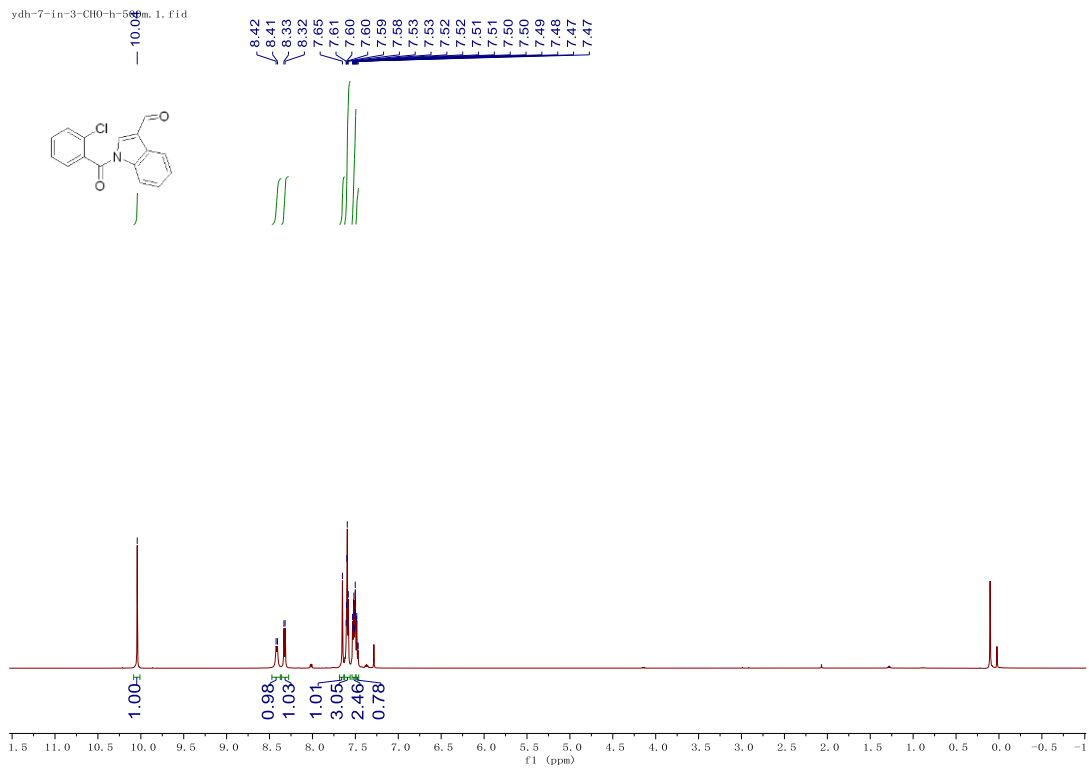

### <sup>13</sup>C NMR of S30

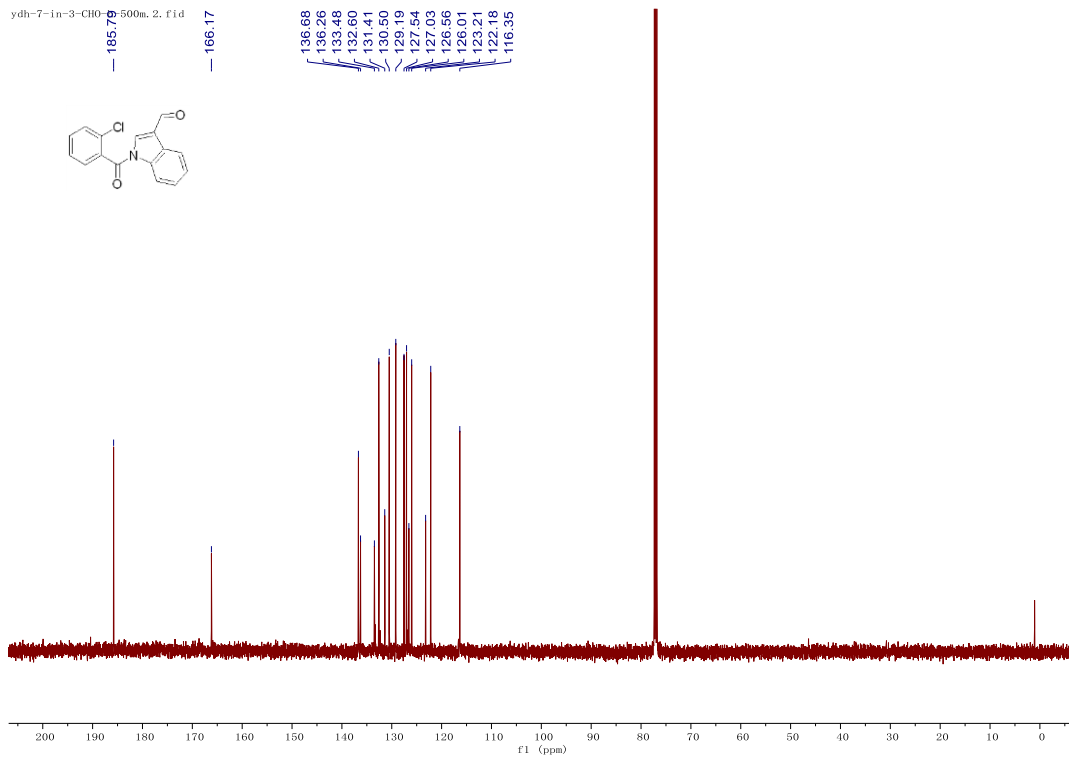

### <sup>1</sup>H NMR of S31

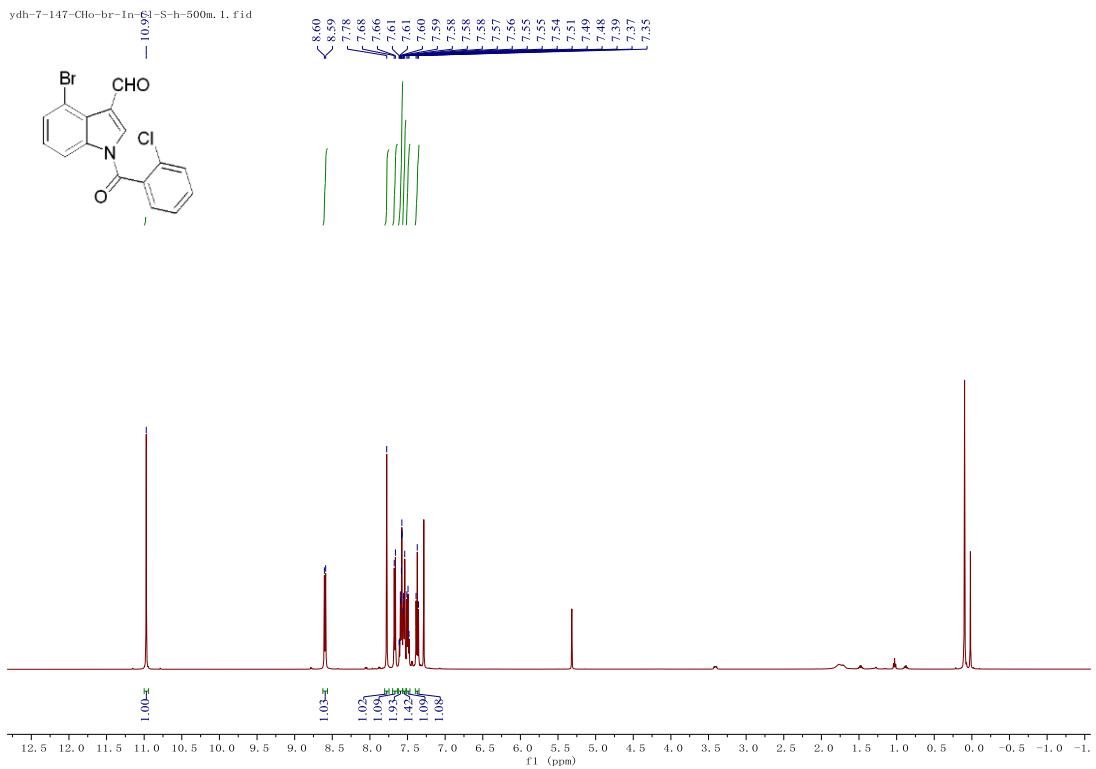

### <sup>13</sup>C NMR of S31

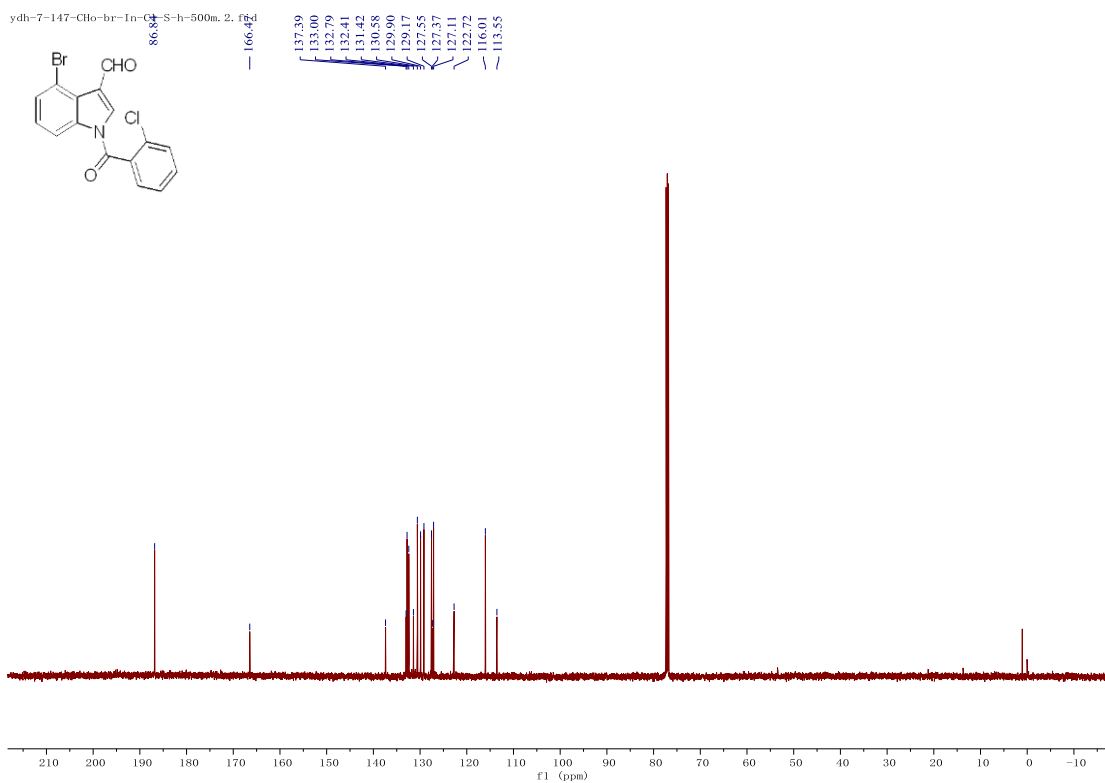

### <sup>1</sup>H NMR of S32

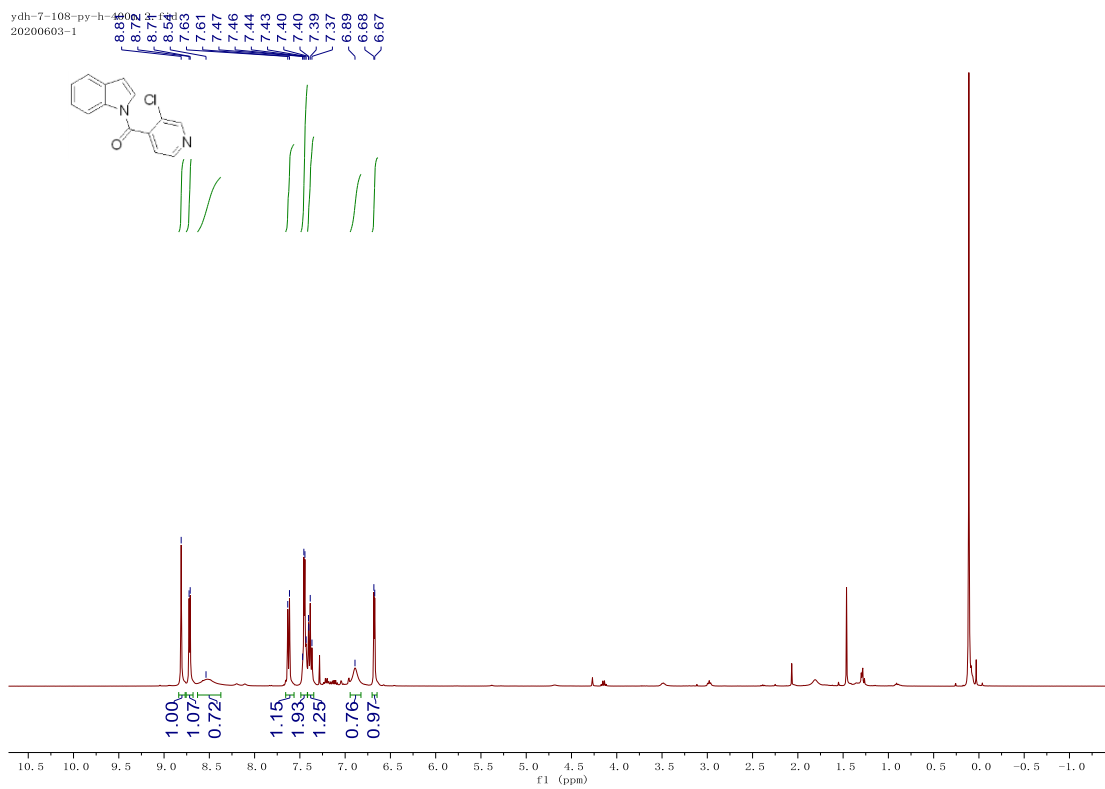

### <sup>13</sup>C NMR of S32

ydh-7-108-py-h-400m.3.fid  
20200603-1

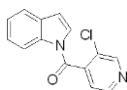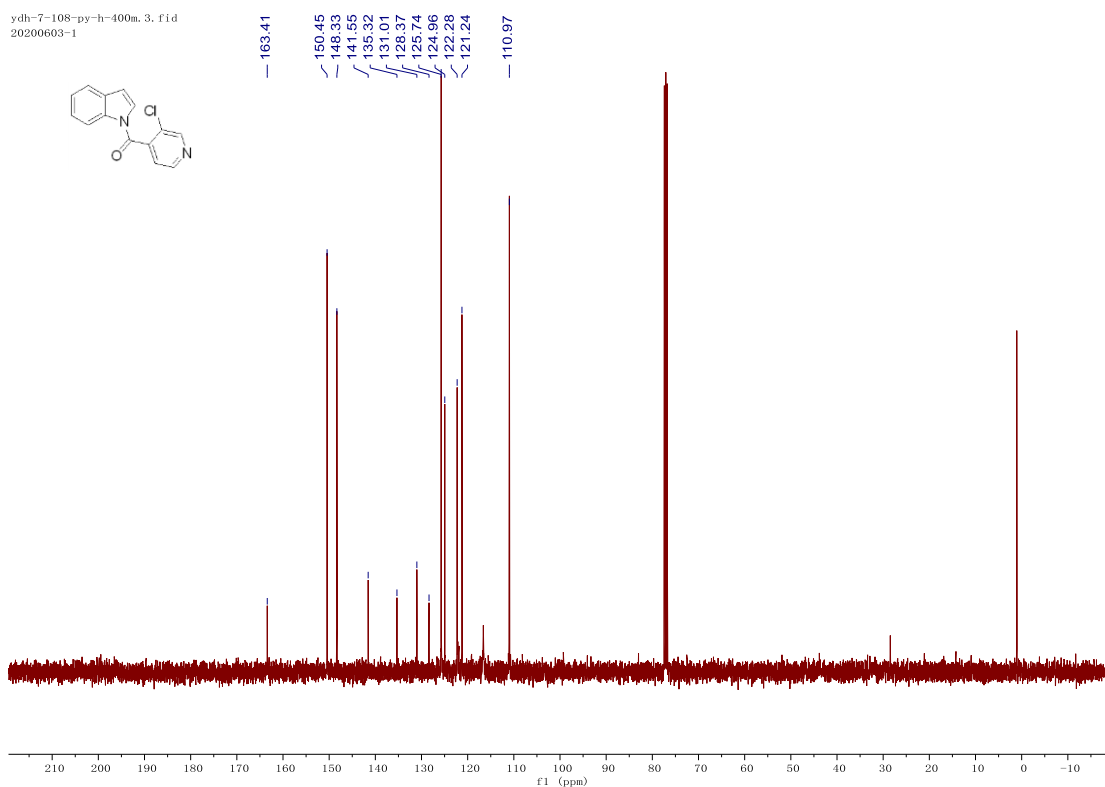

### <sup>1</sup>H NMR of S33

ydh-7-in-5-OH-500m.1.fid

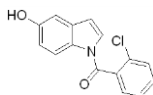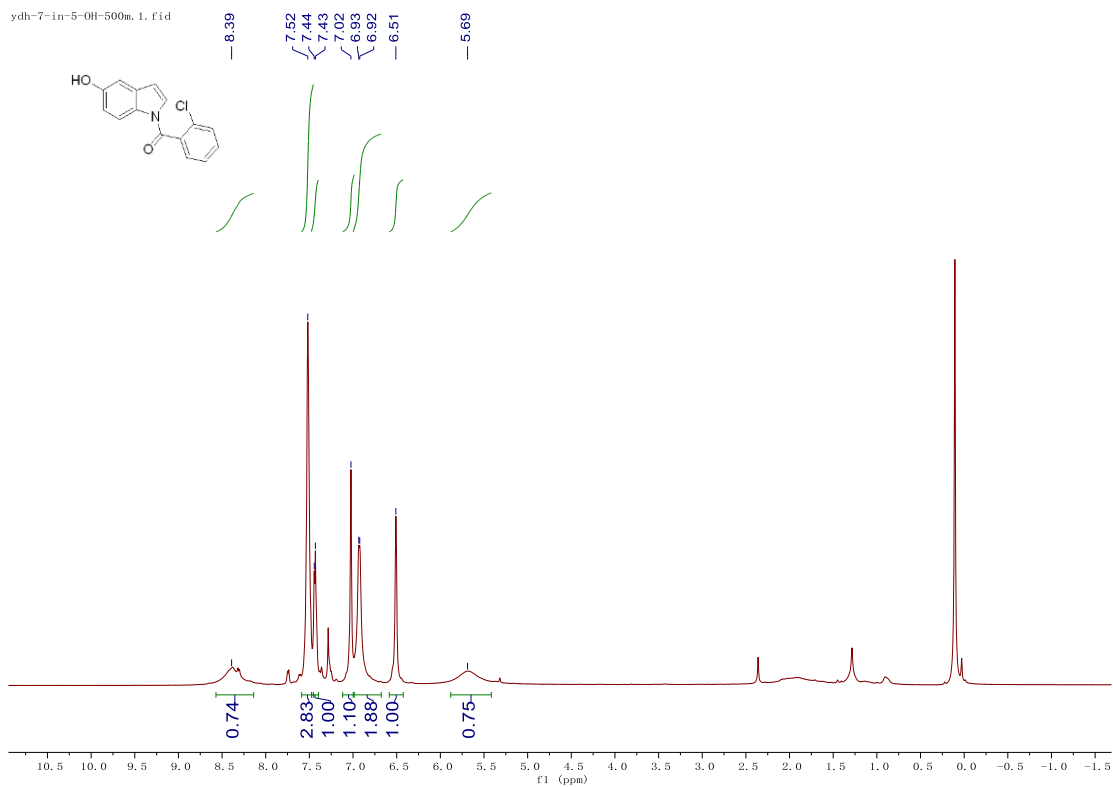

### <sup>13</sup>C NMR of S33

ydh-7-in-5-OH-500m. 2.fid

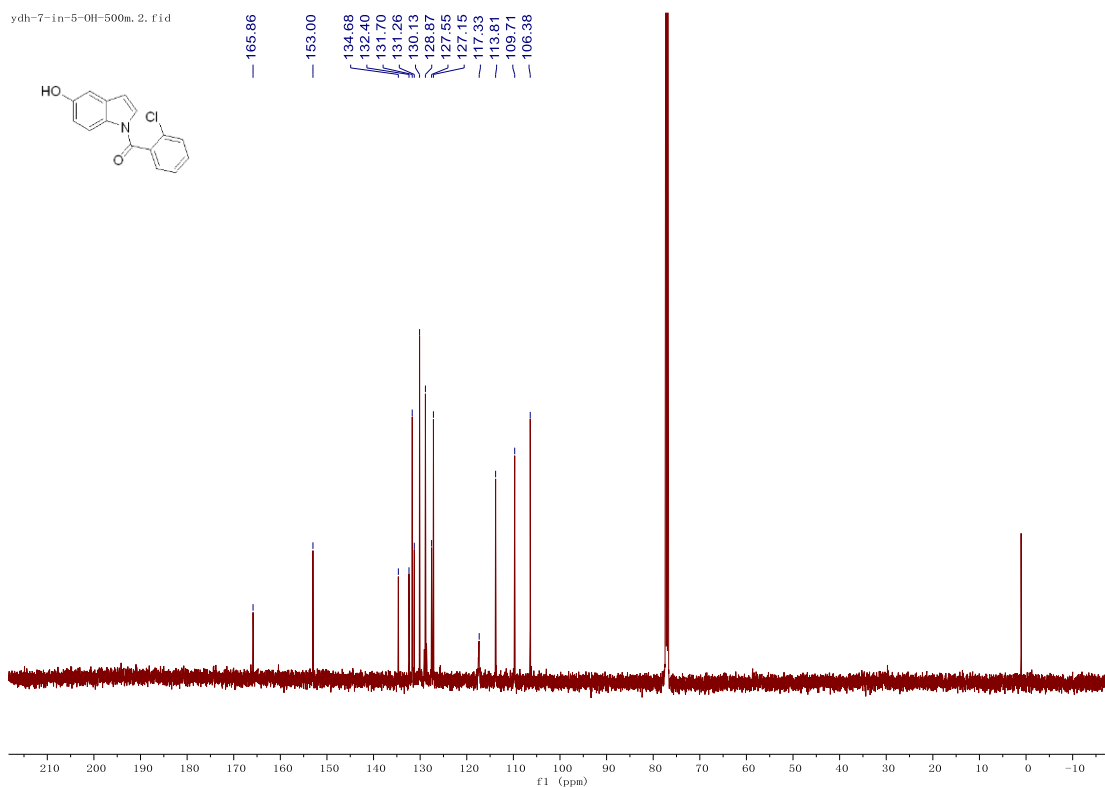

### <sup>1</sup>H NMR of S34

ydh-7-141-N3-in-s-h-400m. 2.fid

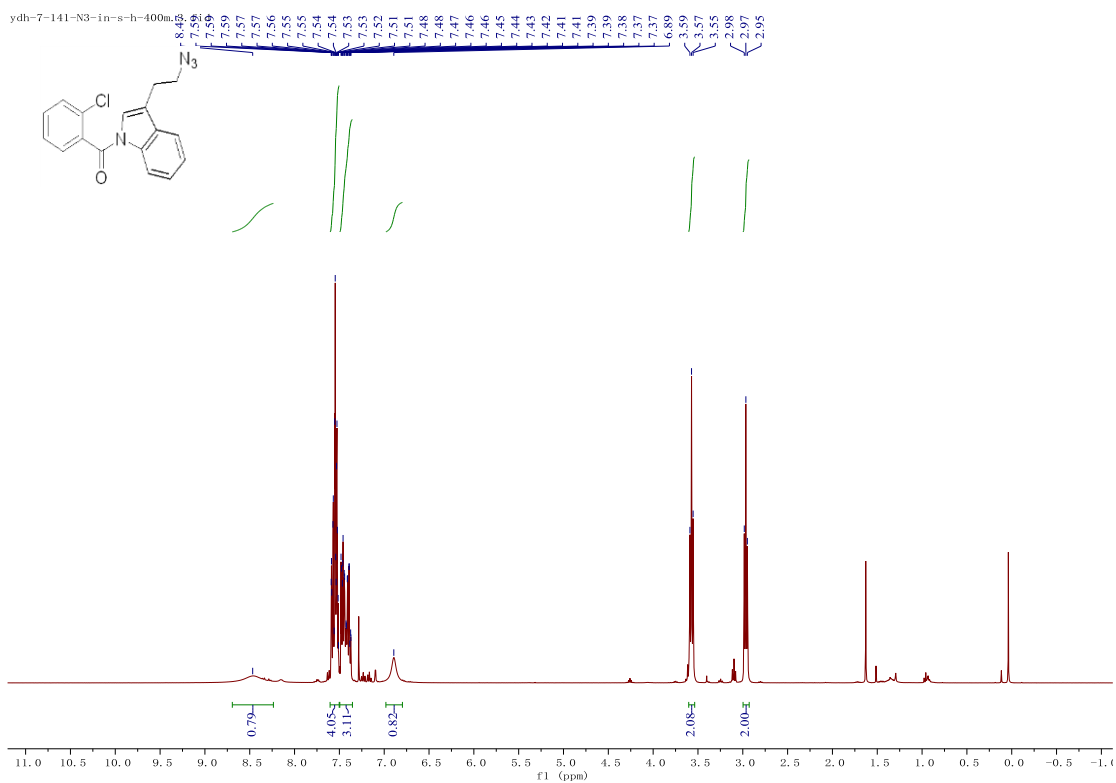

### <sup>13</sup>C NMR of S34

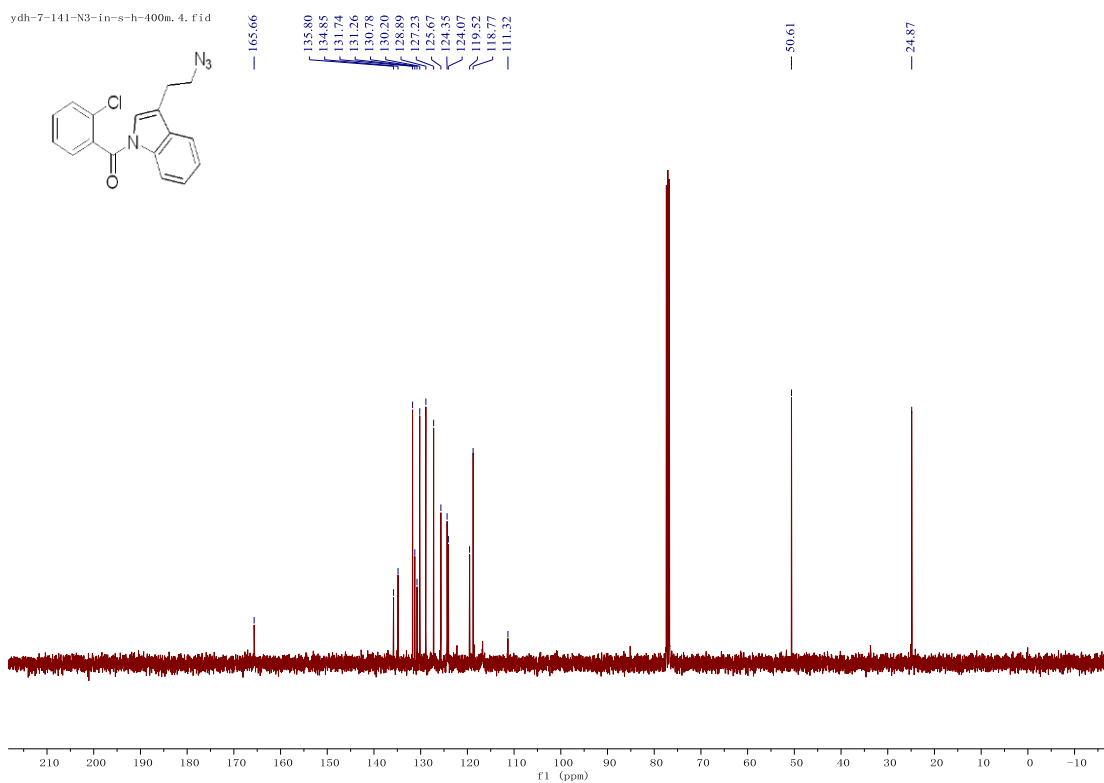

### <sup>1</sup>H NMR of S35

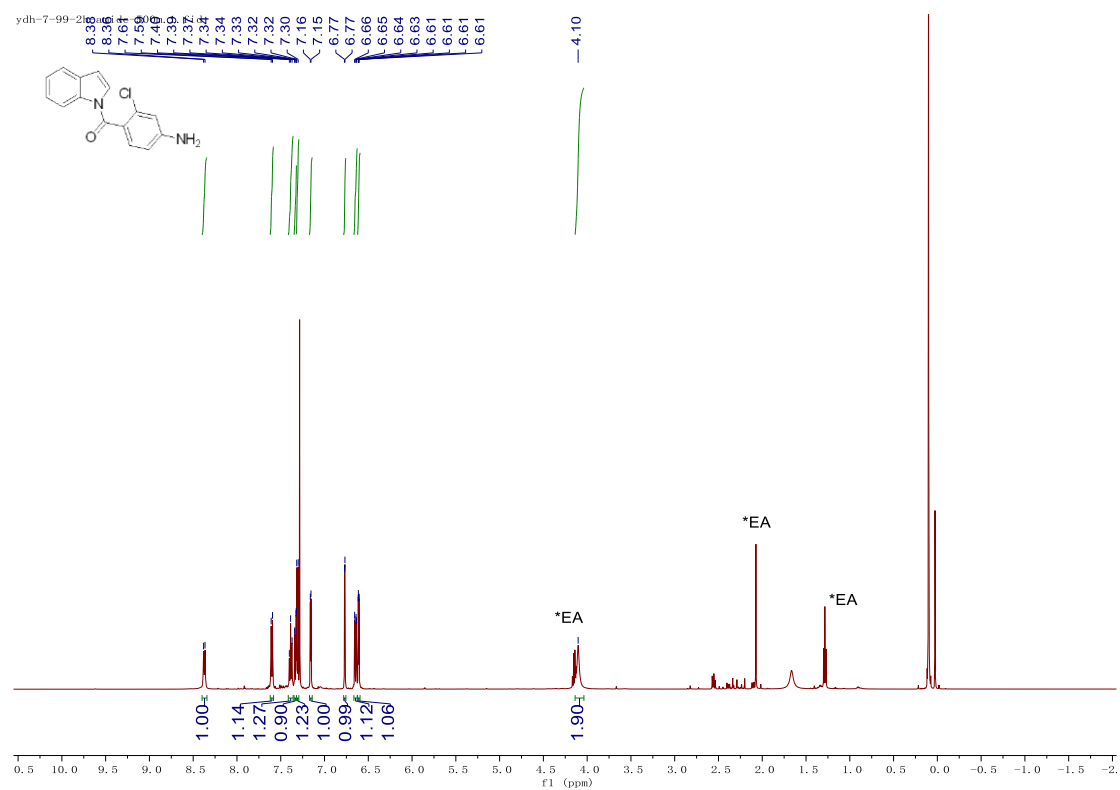

# <sup>13</sup>C NMR of S35

ydh-7-99-2h-amide-500m. 2. fid

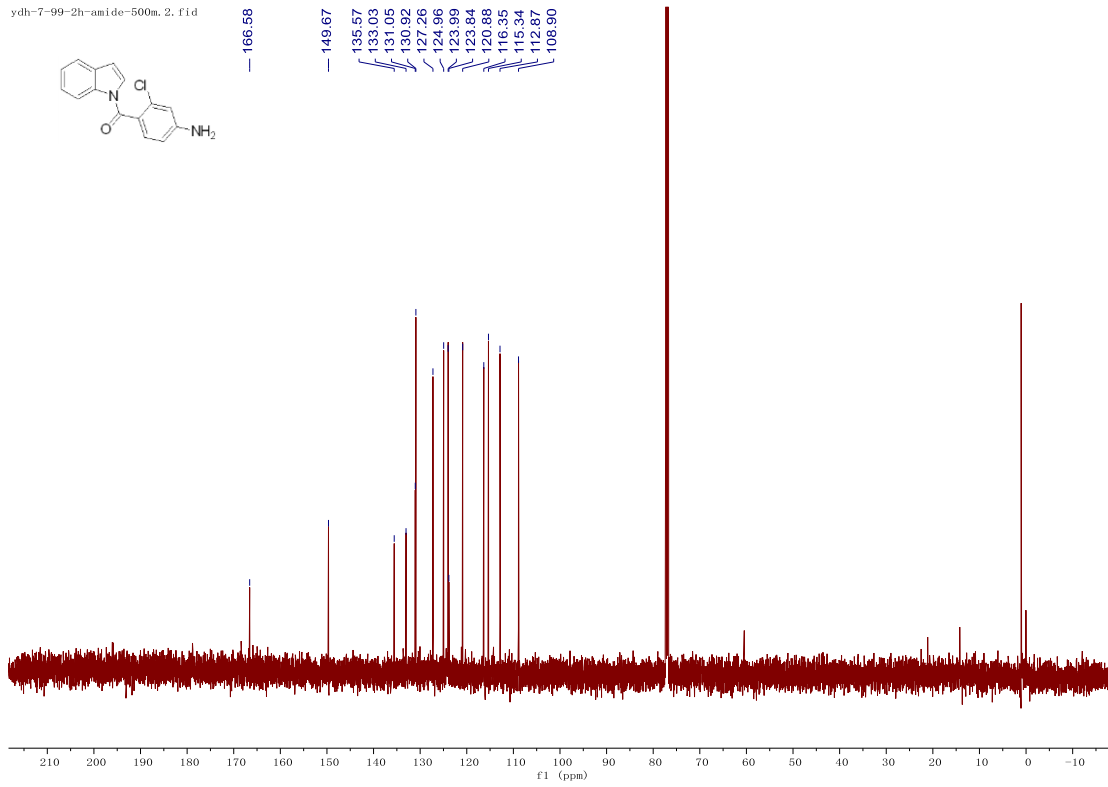

# <sup>1</sup>H NMR of S36

ydh-8-56-in-Bz-Cl-NH2-h-400m  
20201030-400m

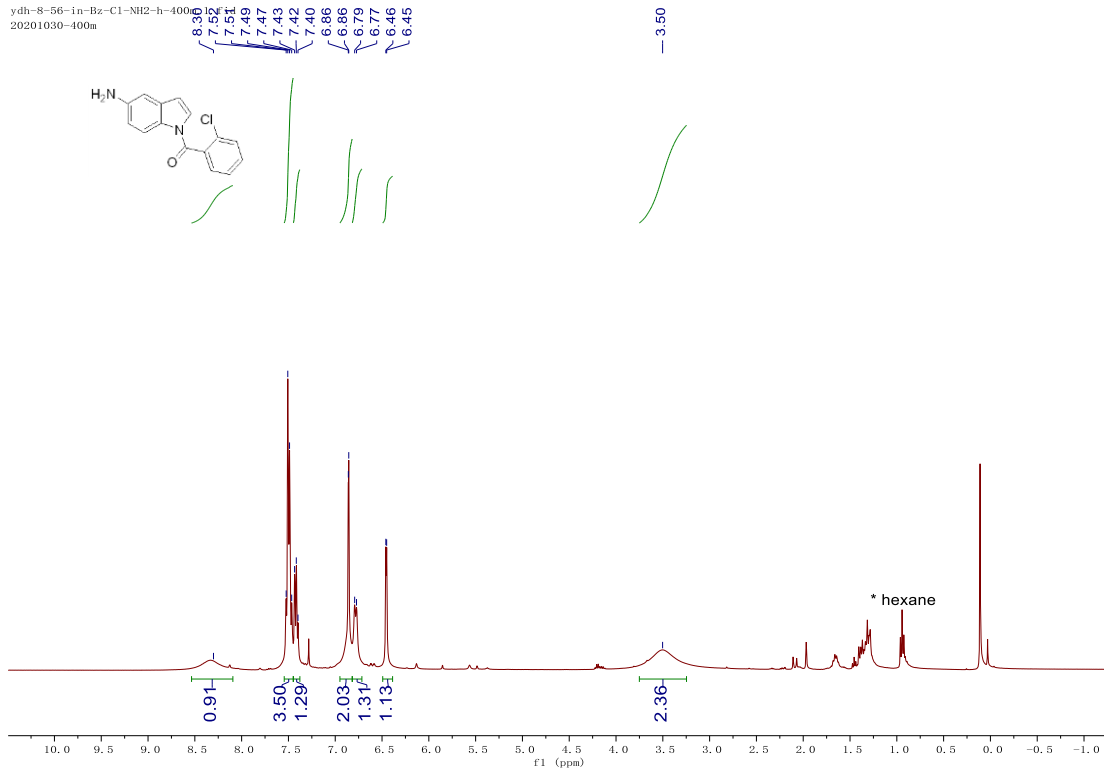



### <sup>13</sup>C NMR of S36

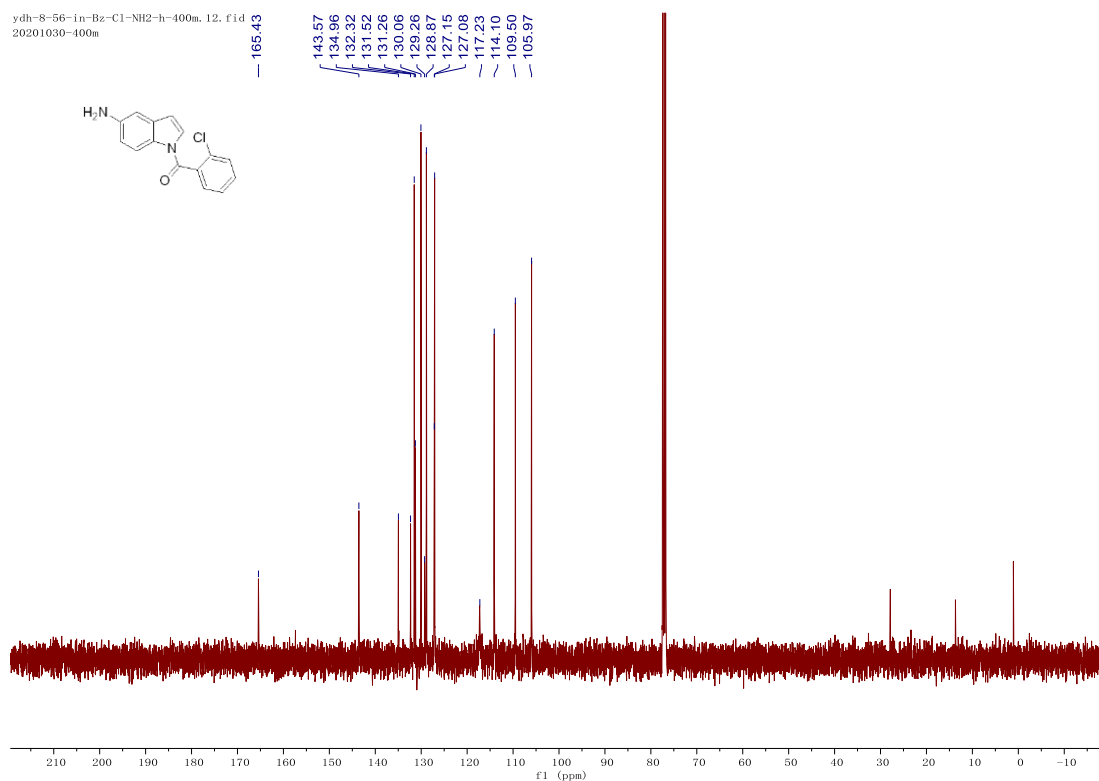

### <sup>1</sup>H NMR of S37

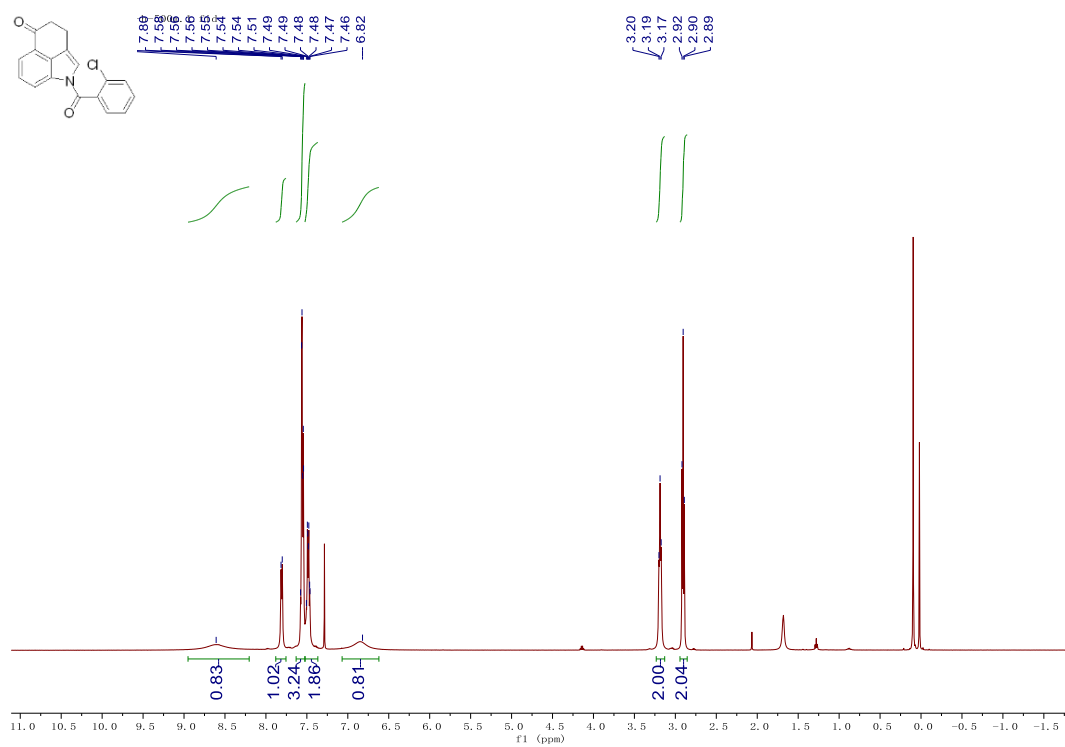

### <sup>13</sup>C NMR of S37

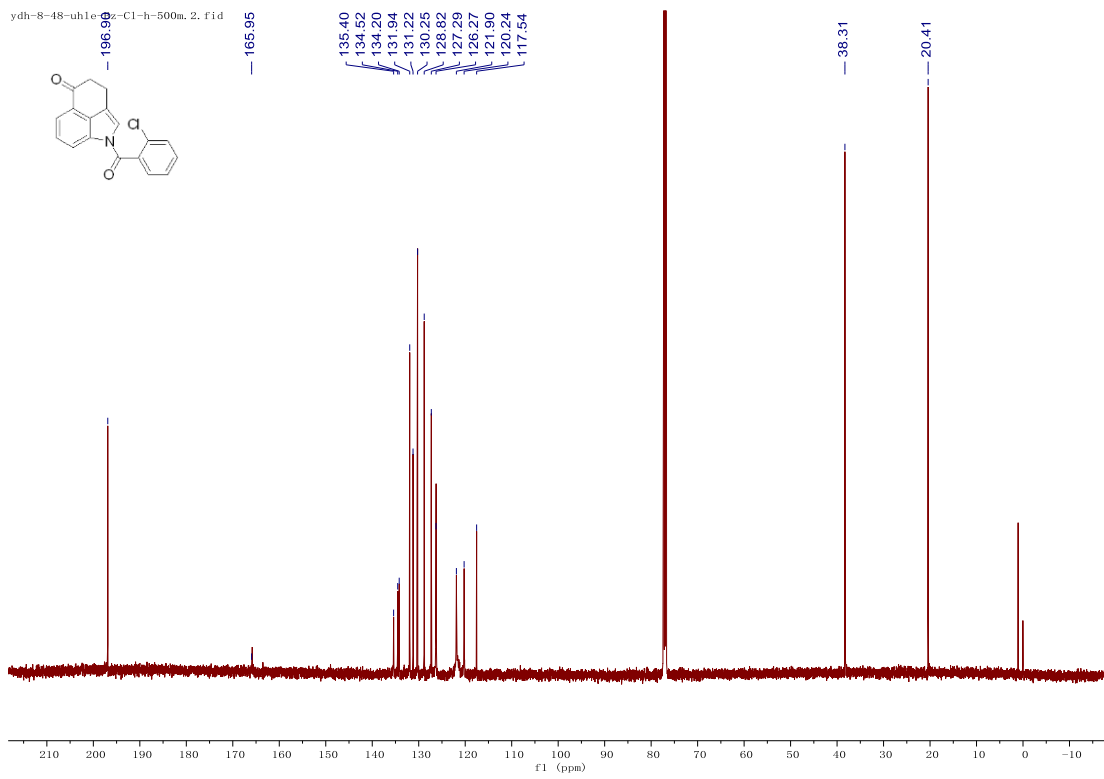

### <sup>1</sup>H NMR of S38

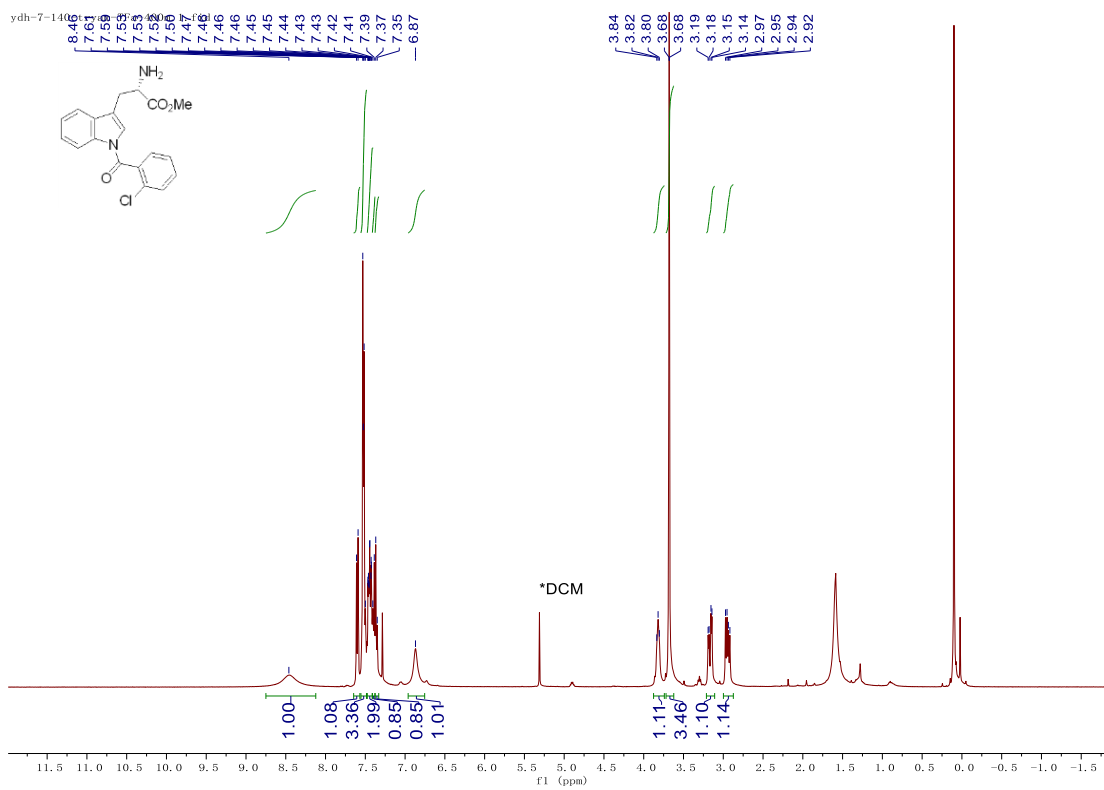

### <sup>13</sup>C NMR of S38

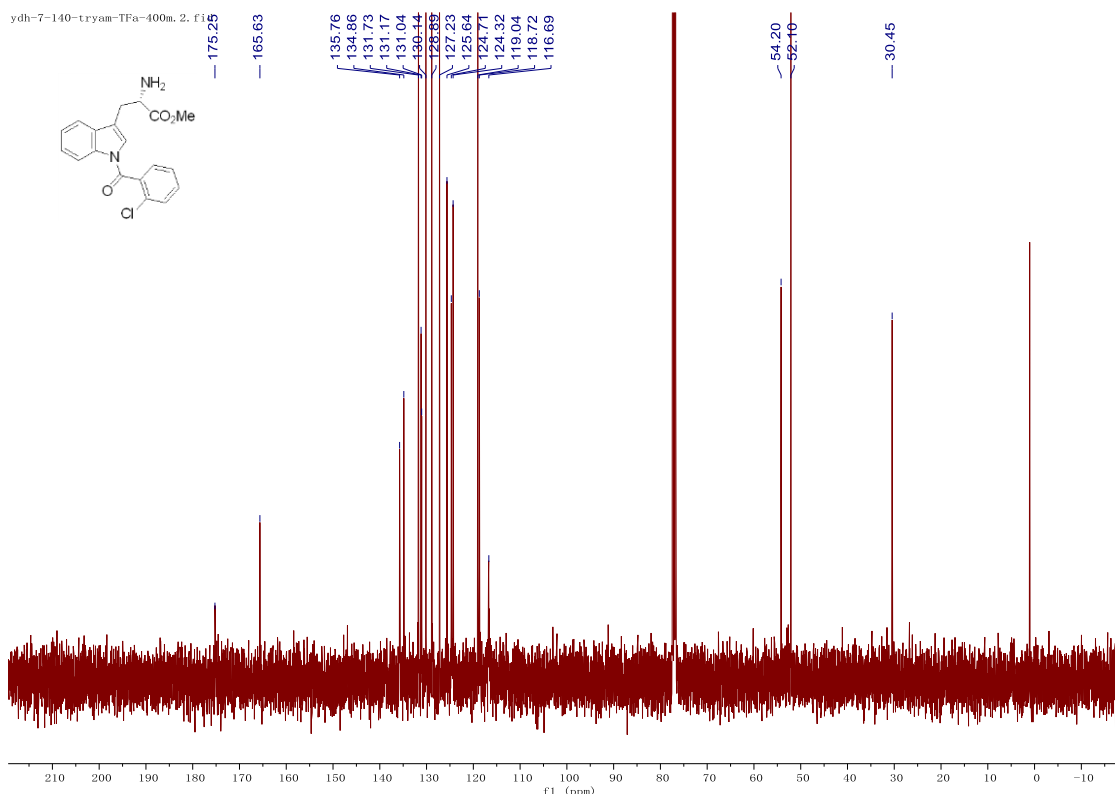

### <sup>1</sup>H NMR of S39

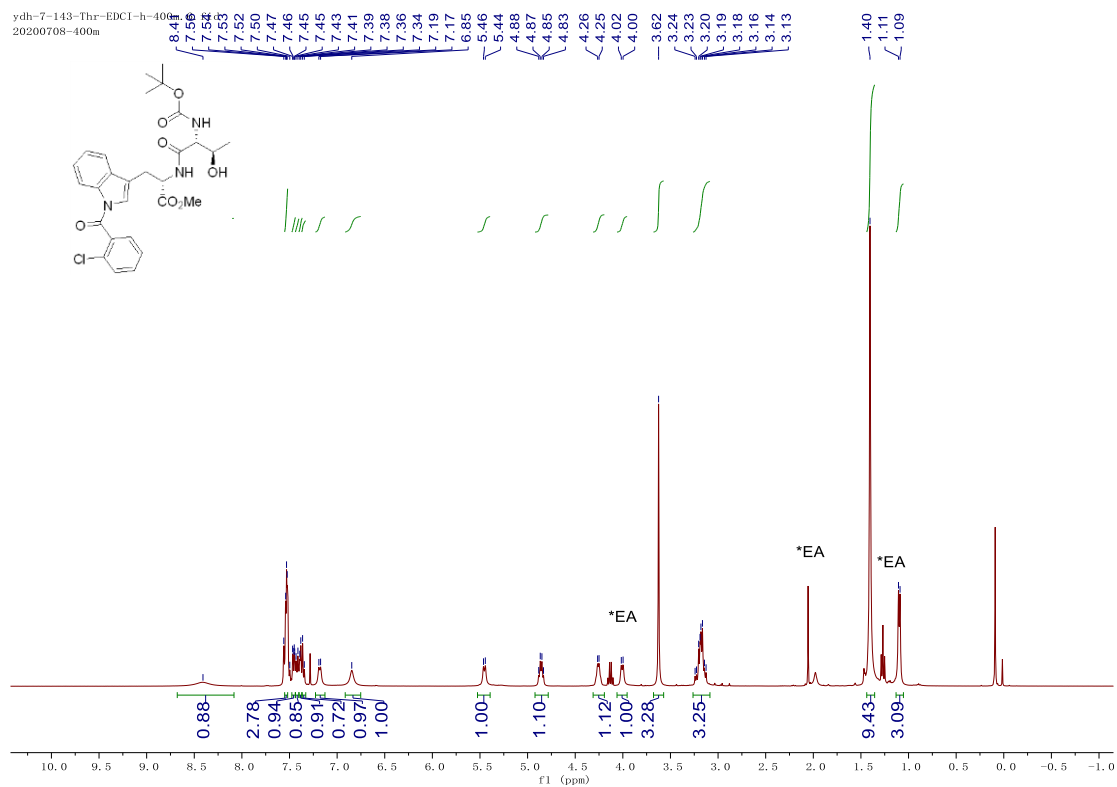

### <sup>13</sup>C NMR of S39

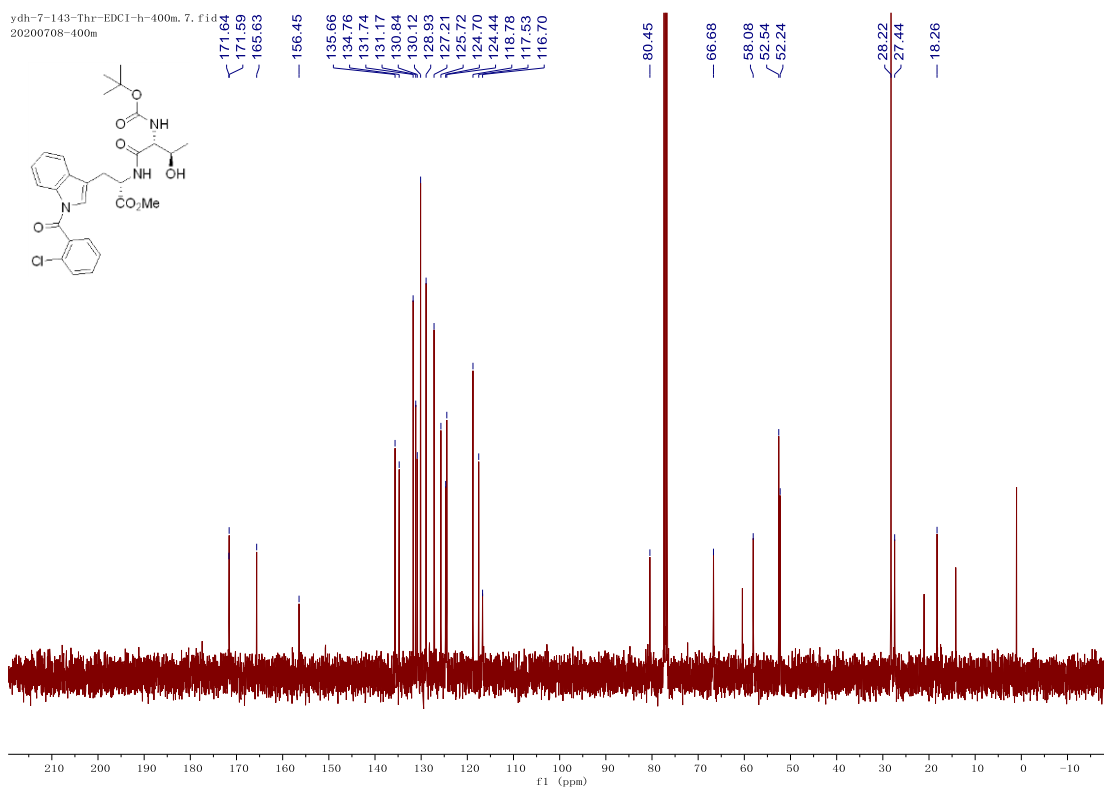

### <sup>1</sup>H NMR of S40

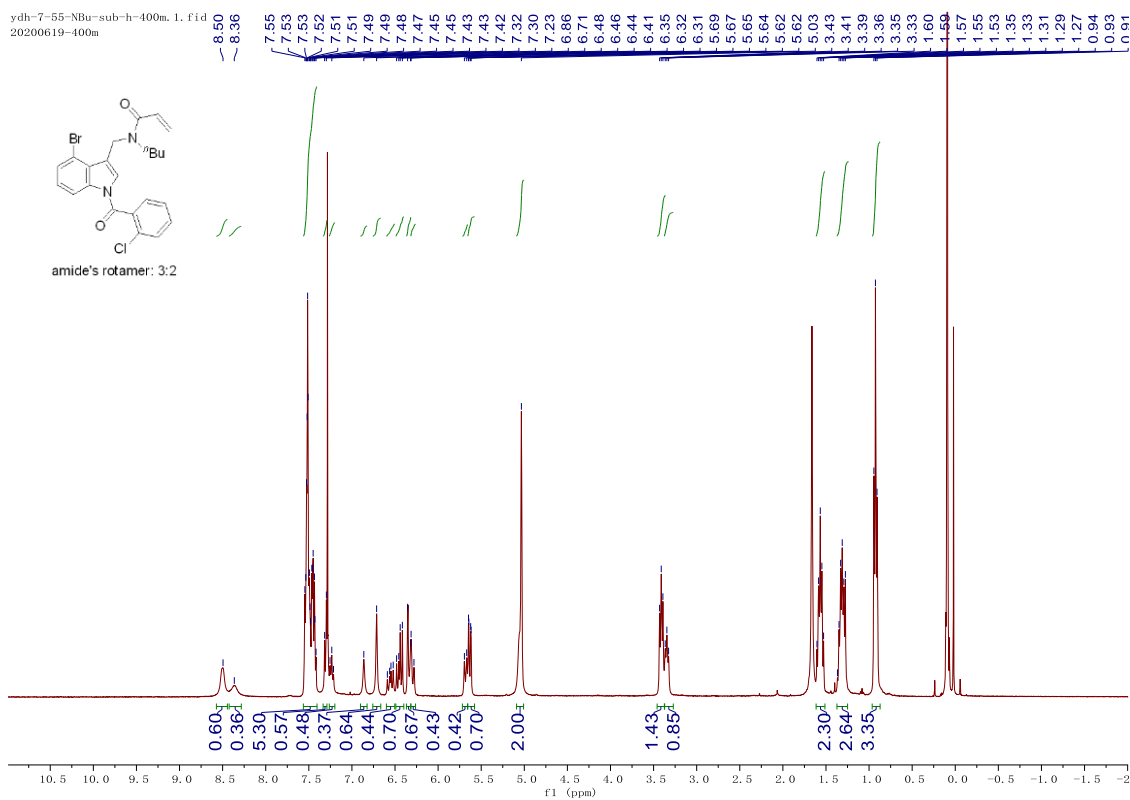

### <sup>13</sup>C NMR of S40

ydh-7-31-C-0621-500m. 1. fid

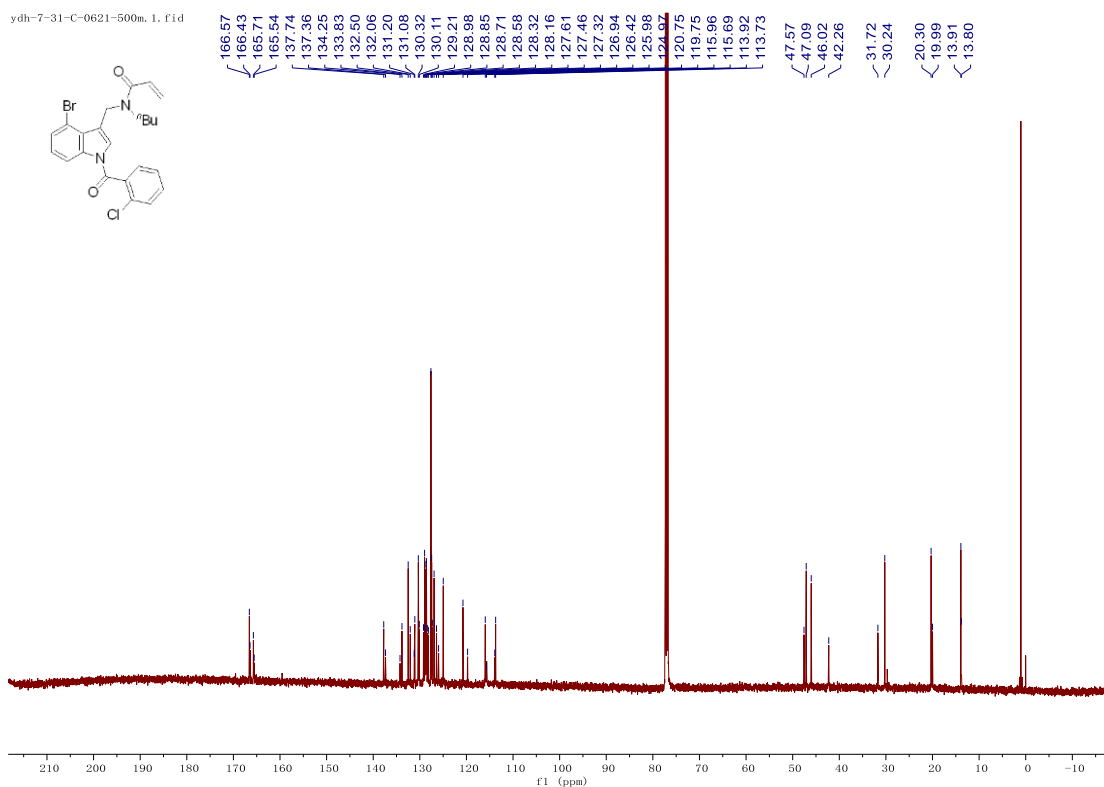

### <sup>1</sup>H NMR of 1

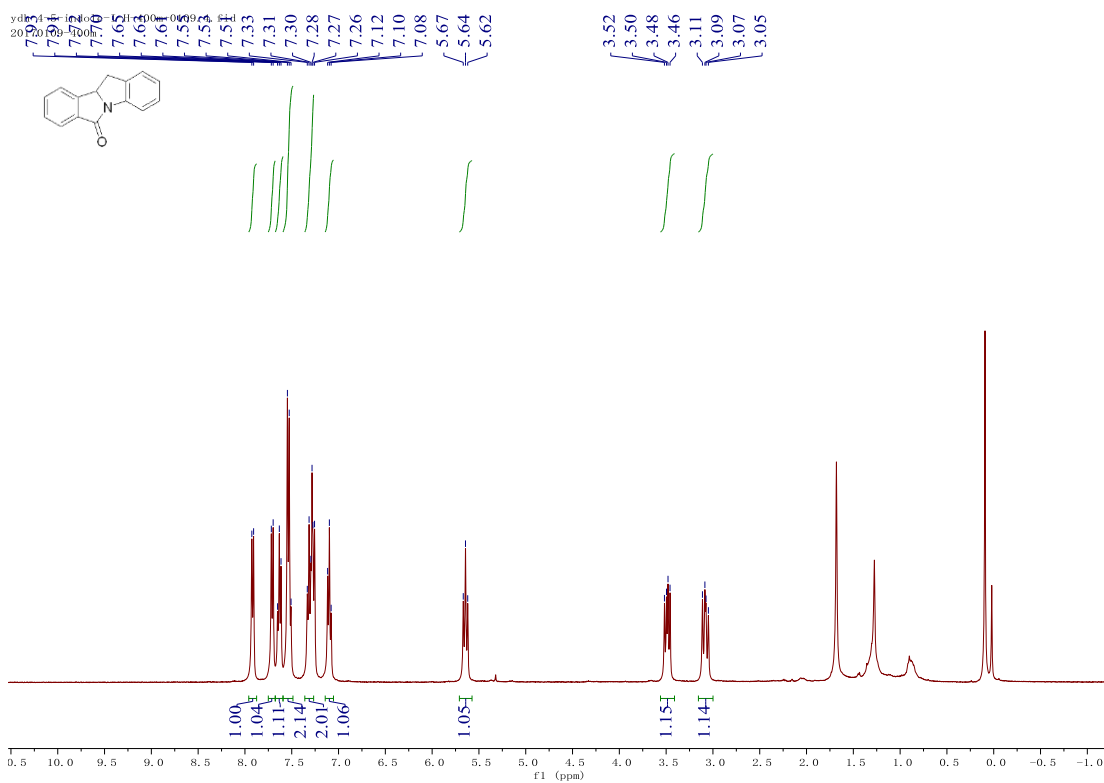

### <sup>13</sup>C NMR of 1

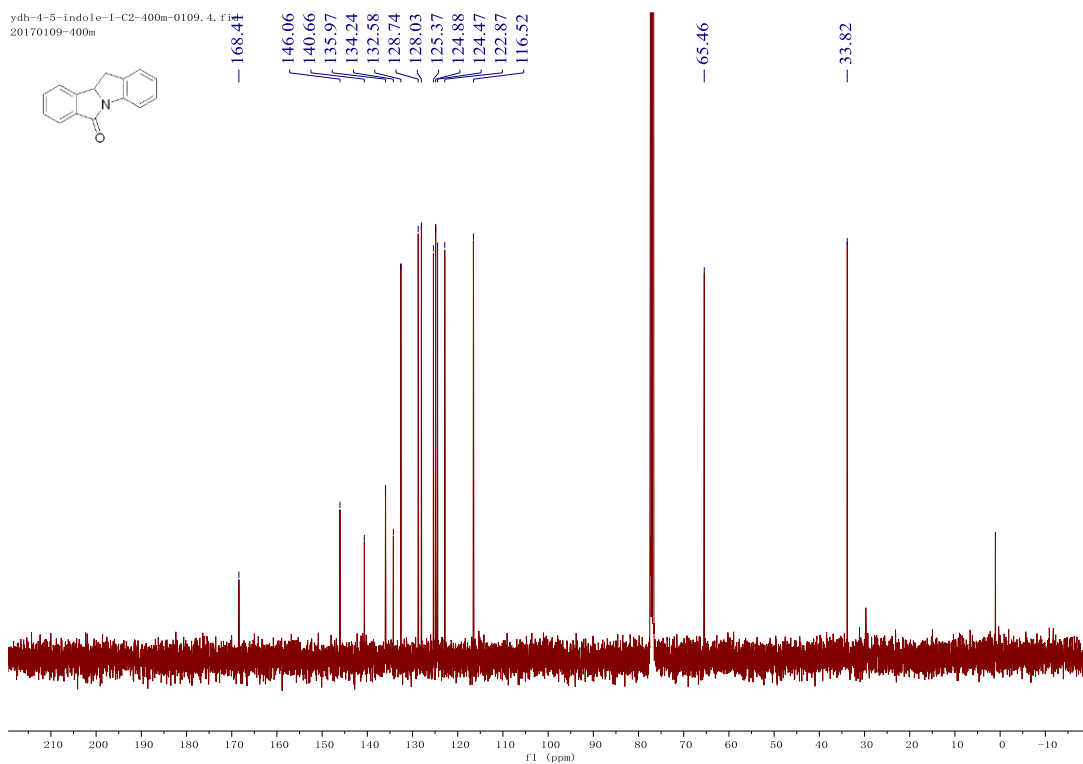

### <sup>1</sup>H NMR of 2

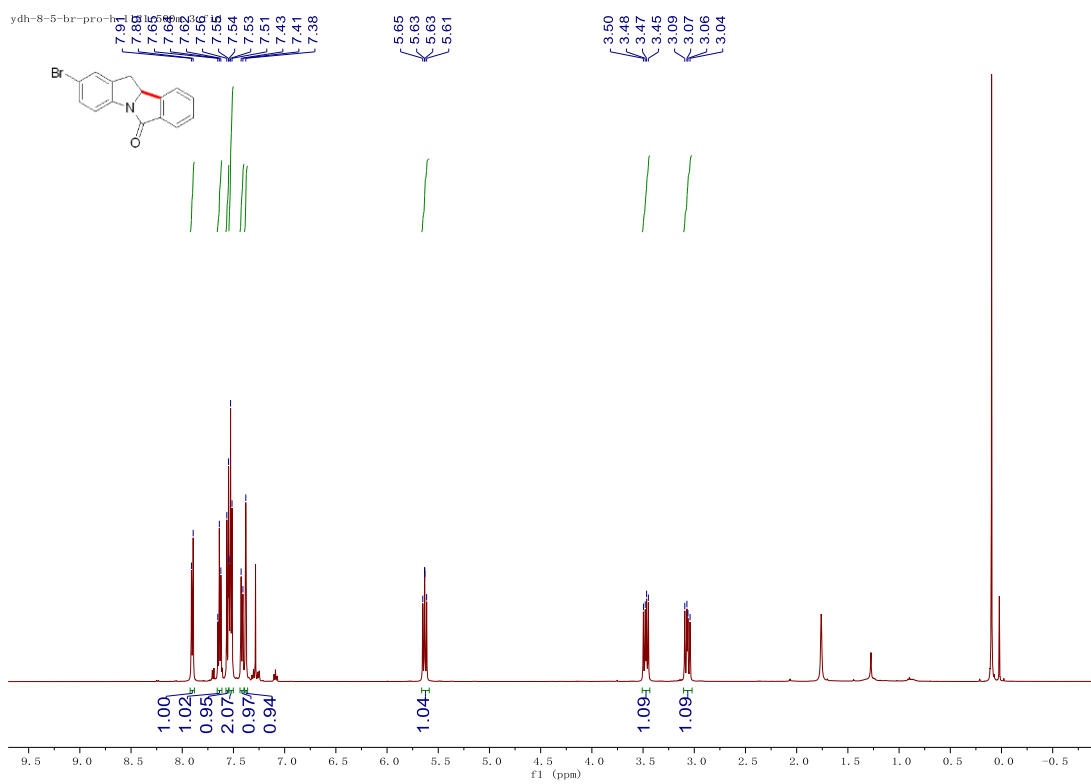

### <sup>13</sup>C NMR of 2

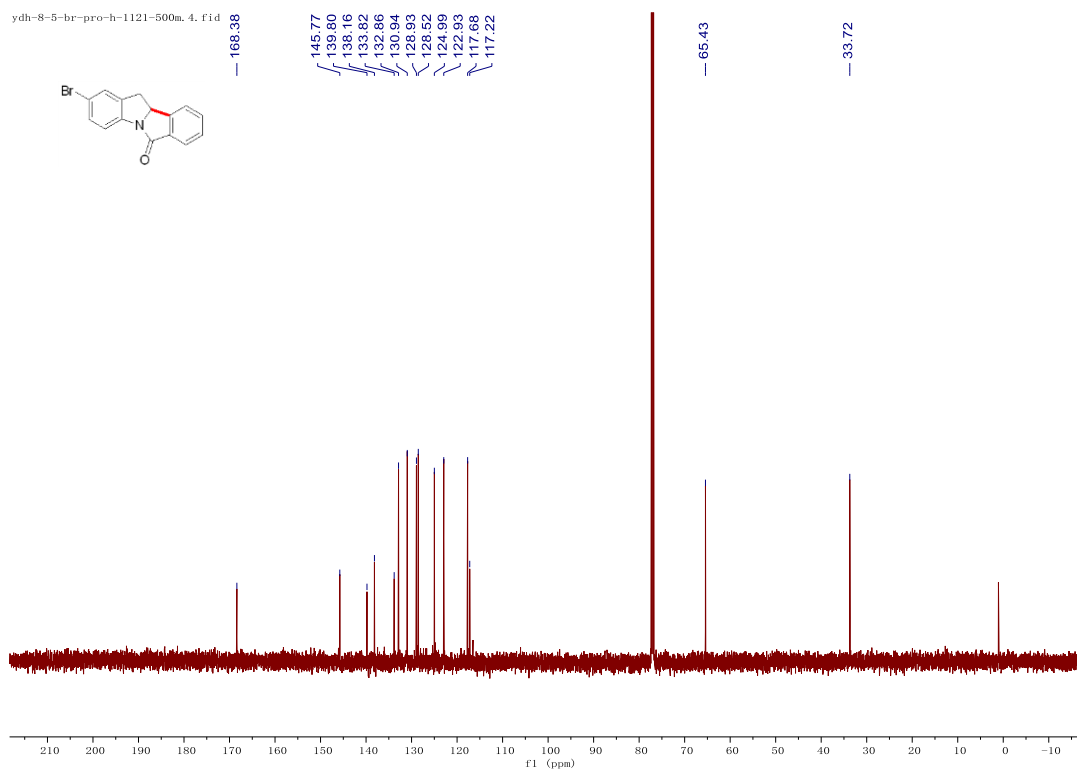

### <sup>1</sup>H NMR of 3

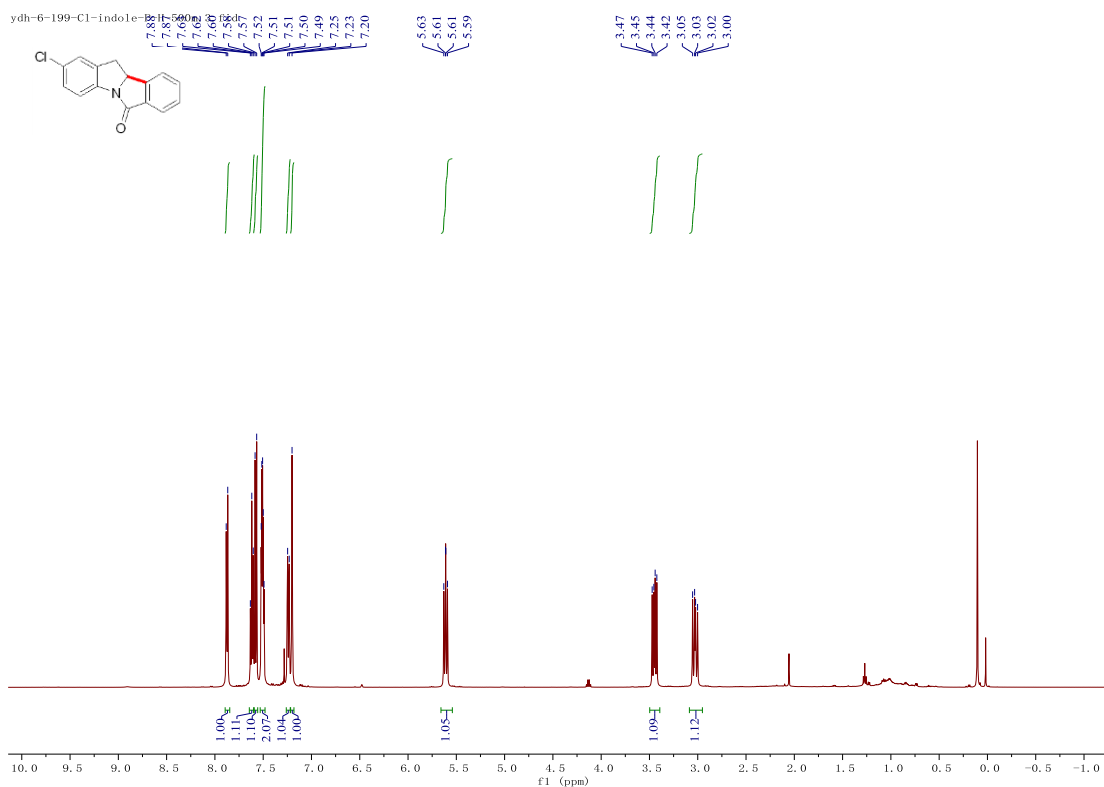

### <sup>13</sup>C NMR of 3

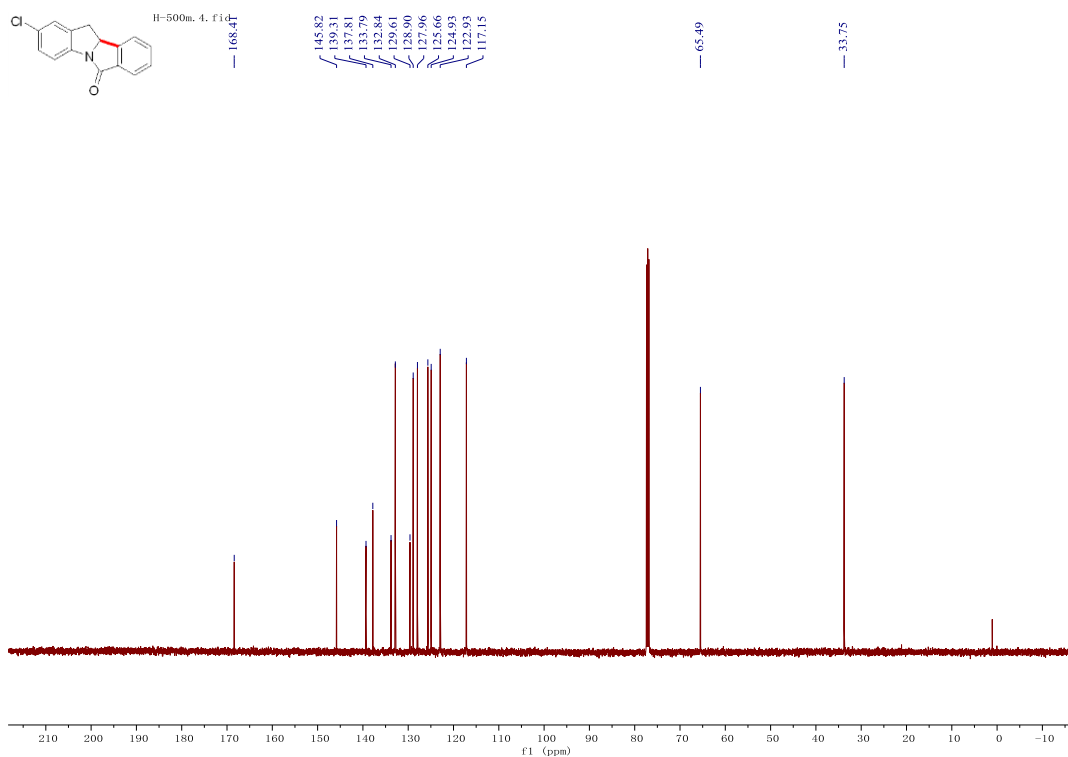

### <sup>1</sup>H NMR of 4

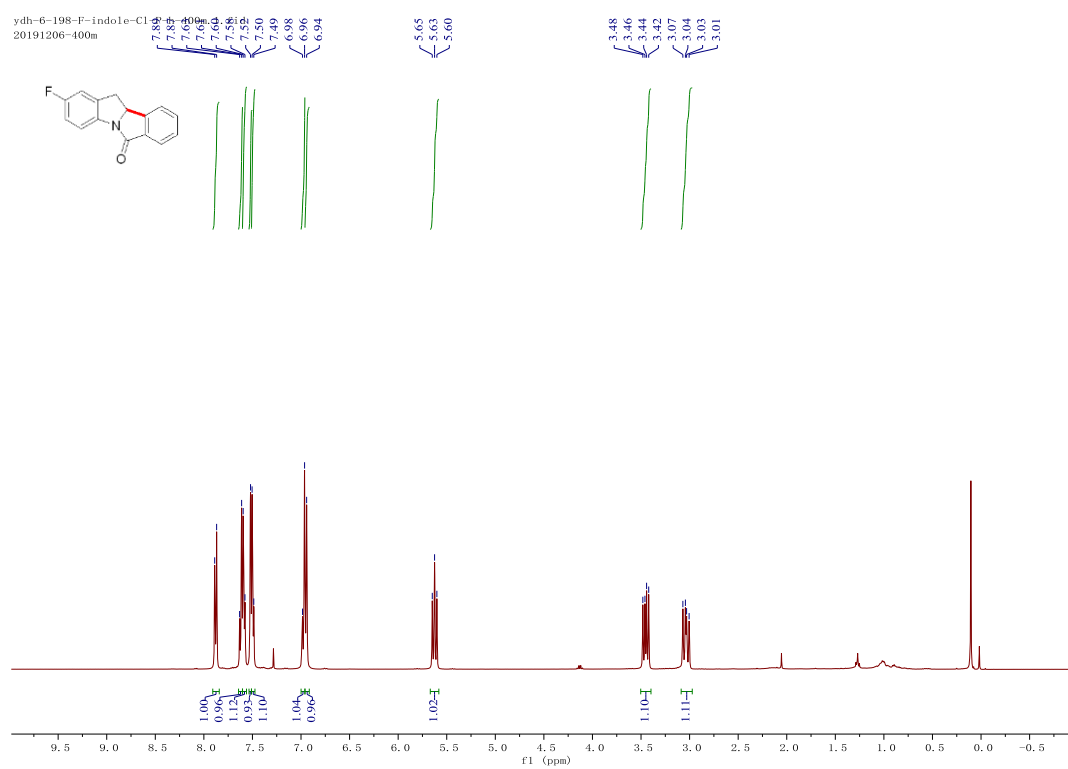



# <sup>19</sup>F NMR of 4

ydh-6-198-F-indole-Cl-P-h-400m. 2. fid  
20191206-400m

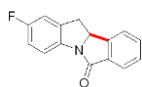

-118.20  
-118.21  
-118.22  
-118.24  
-118.25  
-118.26

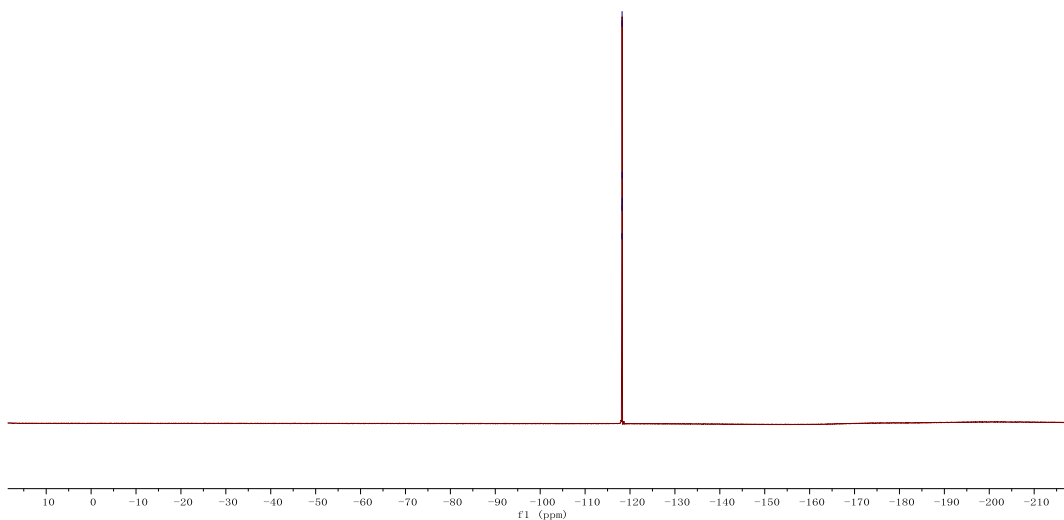

# <sup>13</sup>C NMR of 4

ydh-6-198-F-indole-Cl-P-h-400m. 3. fid  
20191206-400m

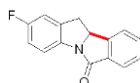

168.591  
161.20  
158.79

145.88  
138.60  
137.91  
136.81  
136.79  
133.89  
132.71  
128.86  
124.87  
122.89  
117.00  
114.42  
114.19  
113.67  
112.86

65.76

33.99  
33.98

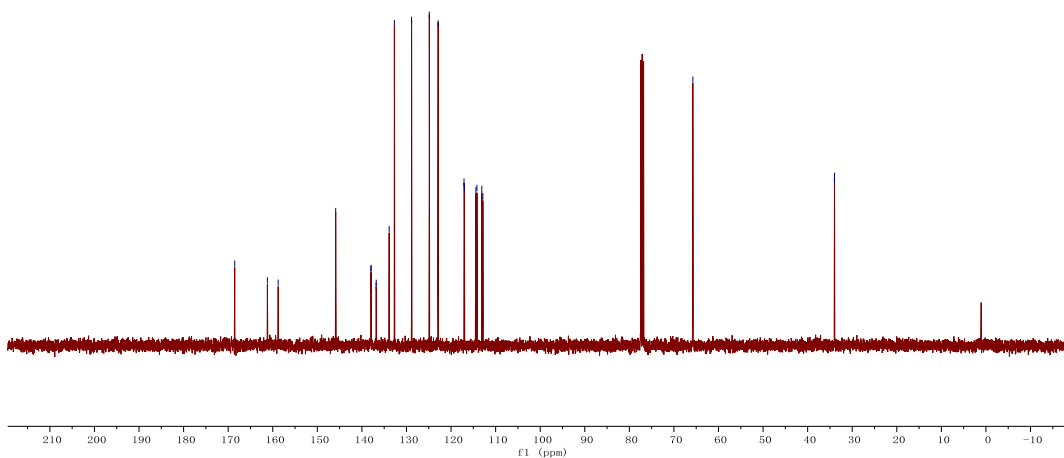

# <sup>1</sup>H NMR of 5

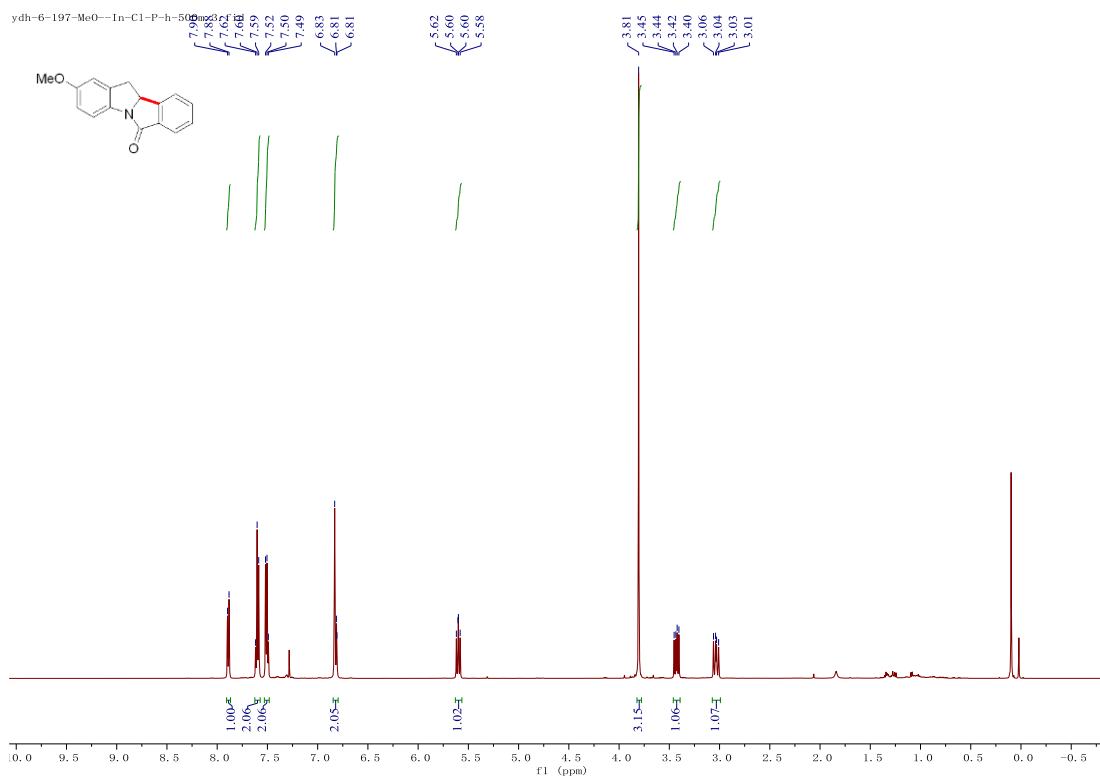

# <sup>13</sup>C NMR of 5

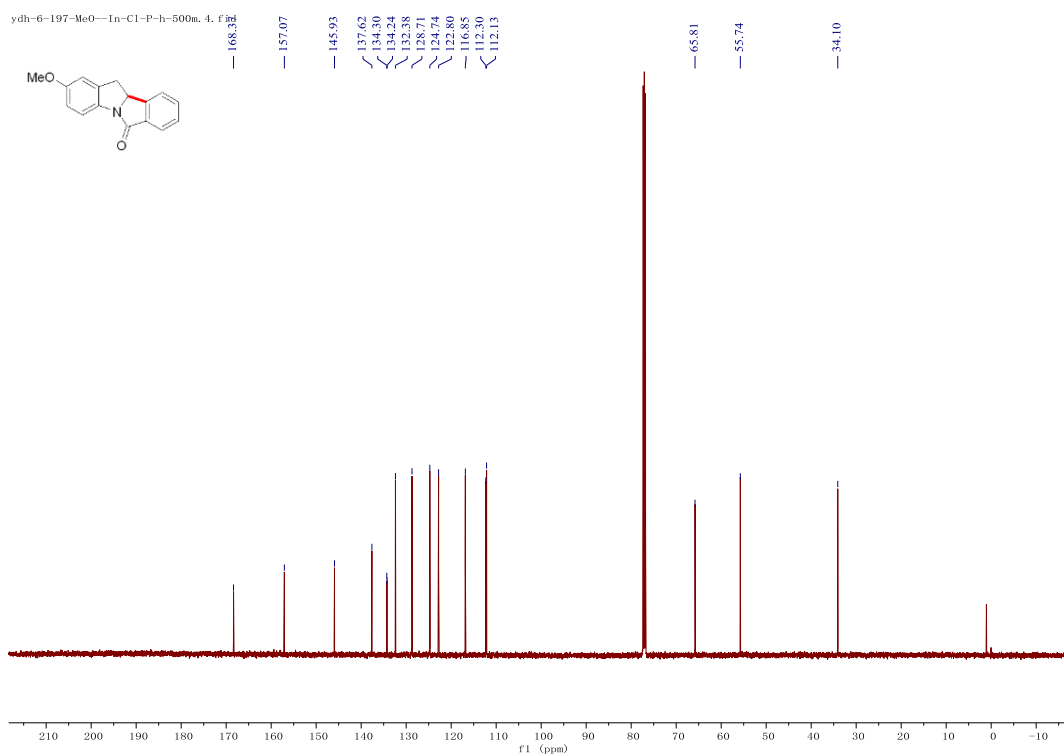

### <sup>1</sup>H NMR of 6

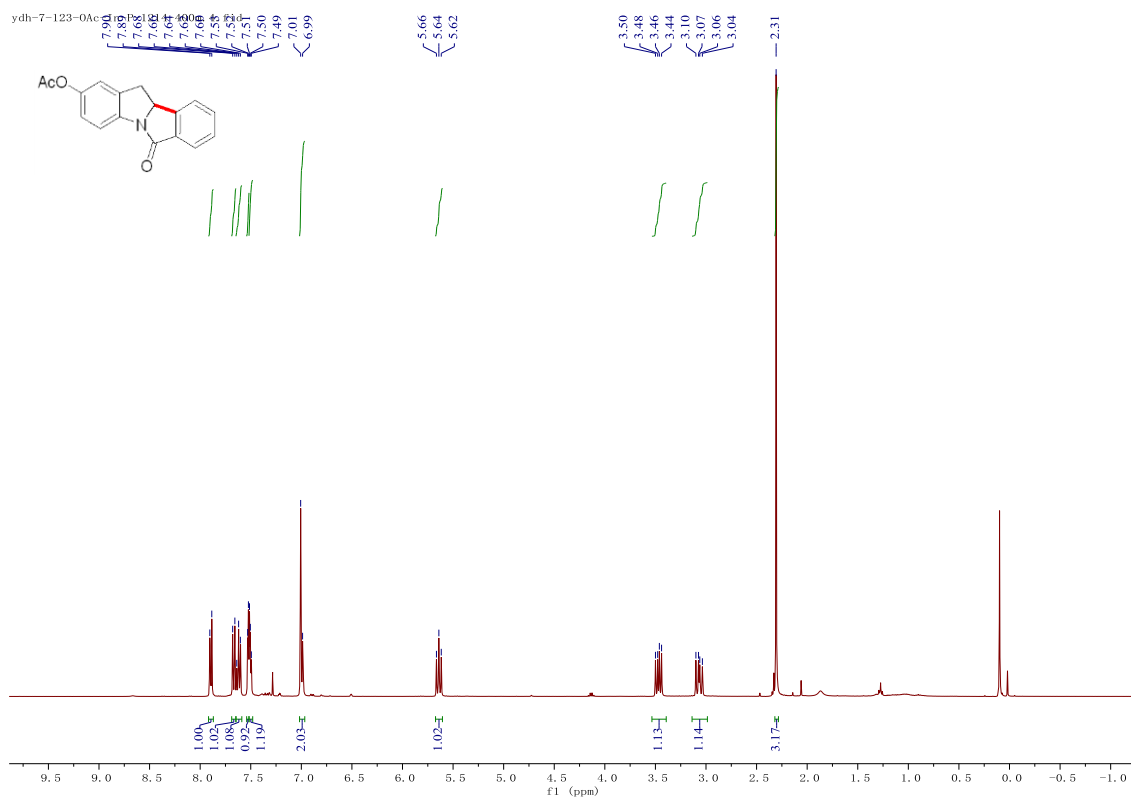

### <sup>13</sup>C NMR of 6

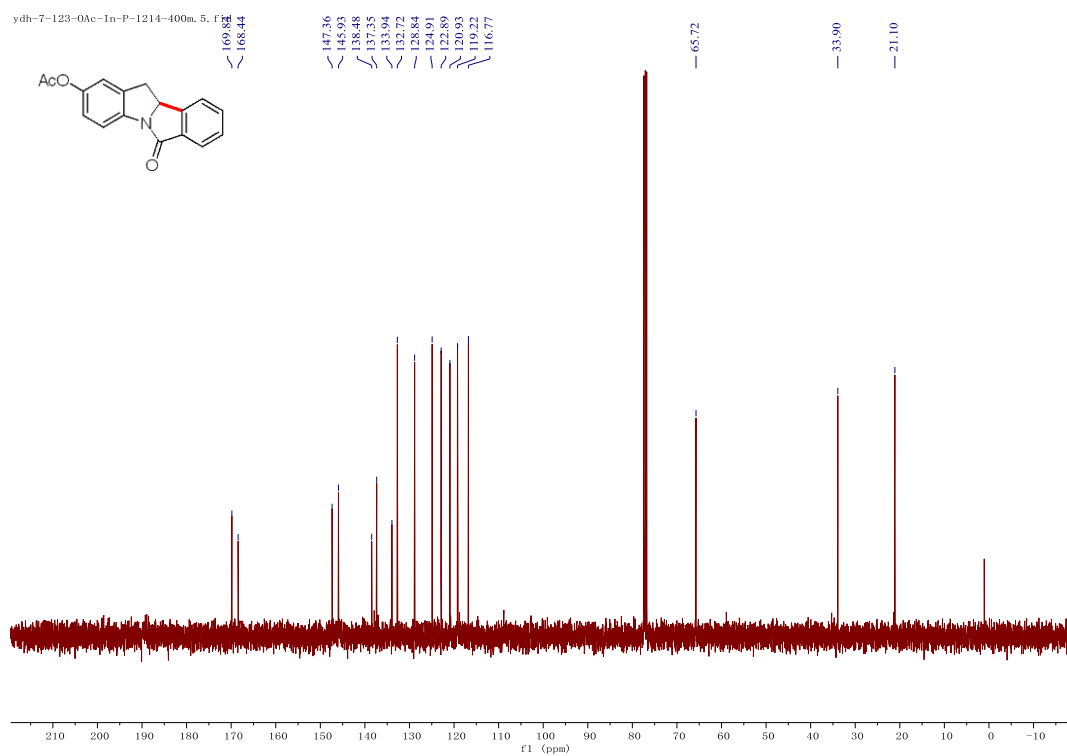

### <sup>1</sup>H NMR of 7

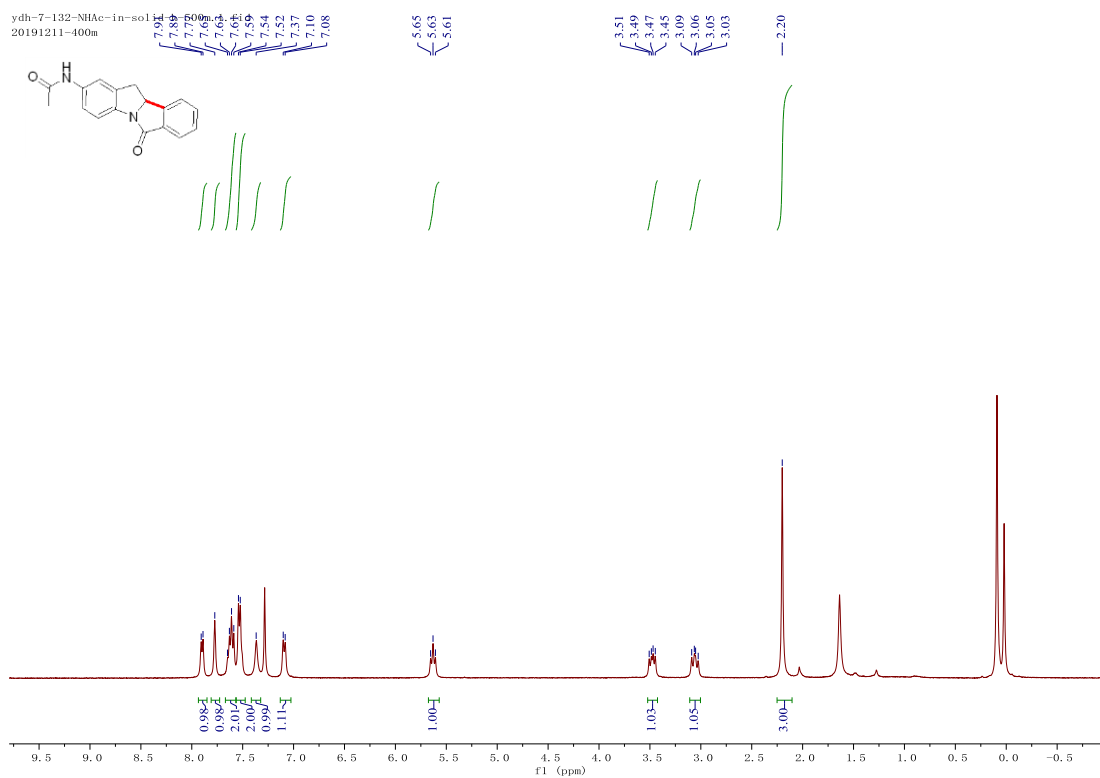

### <sup>13</sup>C NMR of 7

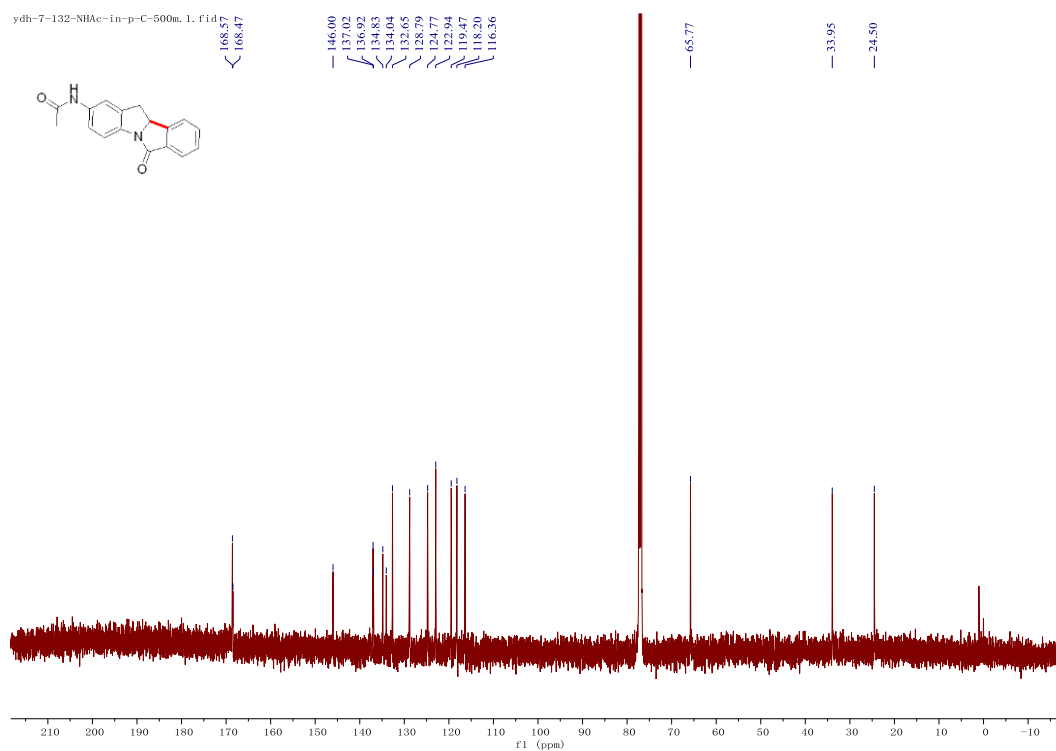

### <sup>1</sup>H NMR of 8

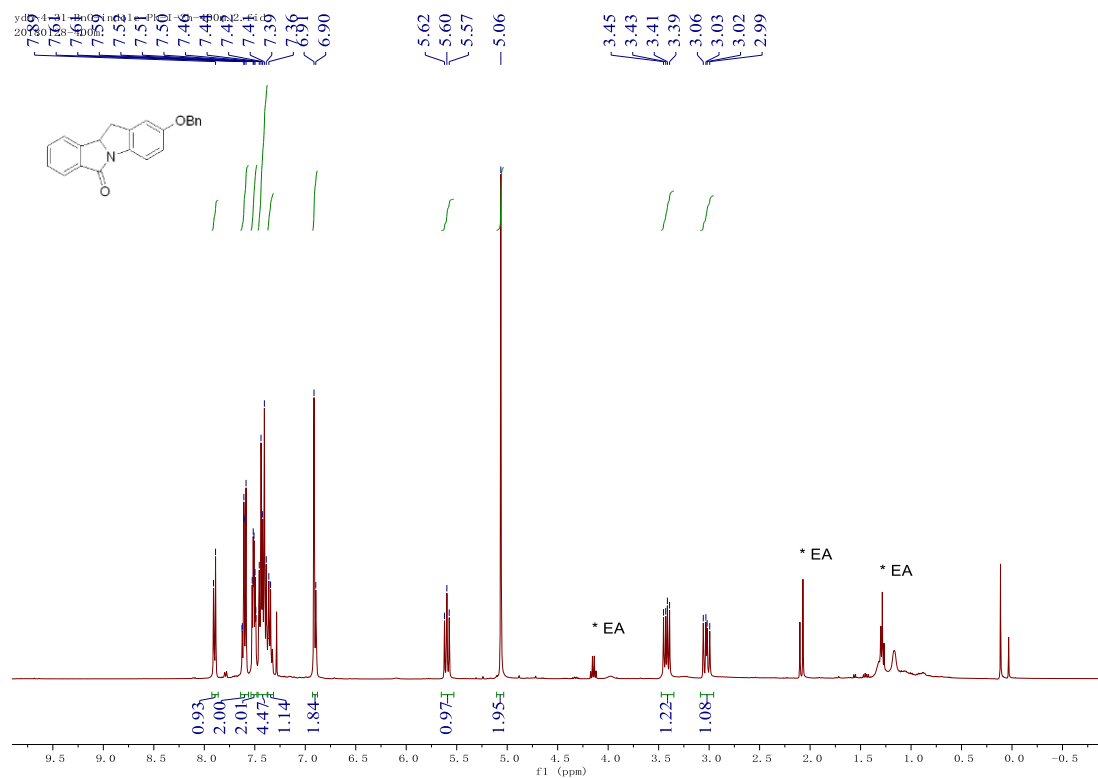

### <sup>13</sup>C NMR of 8

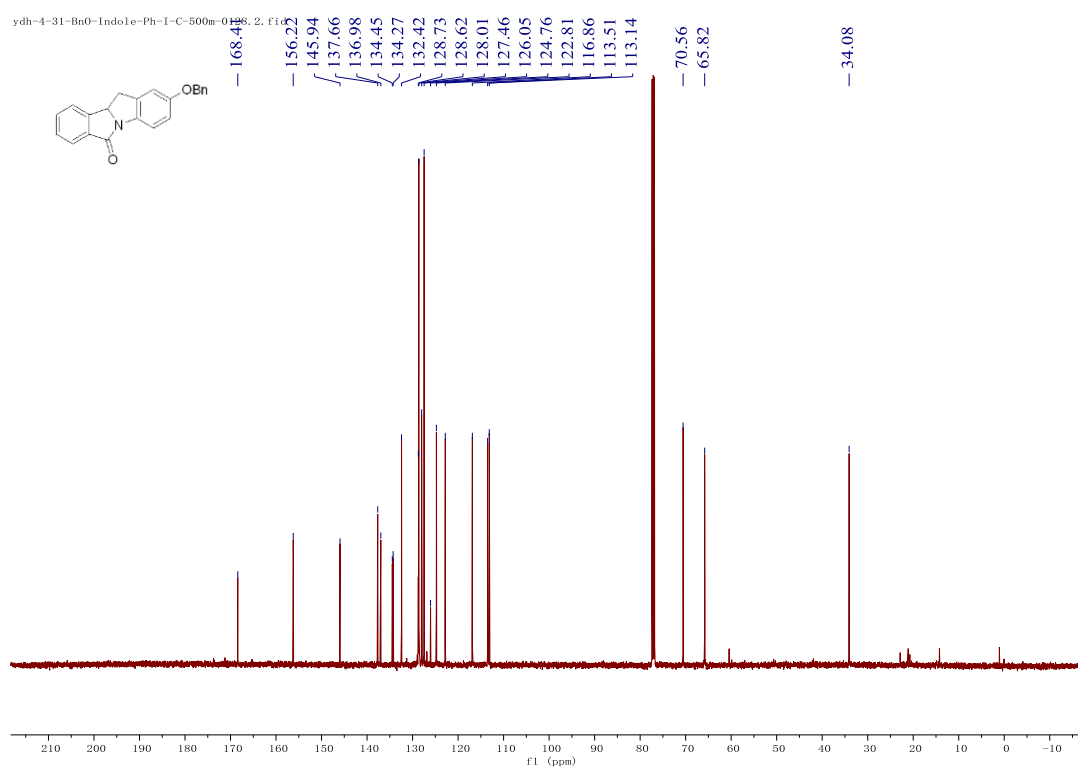

# <sup>1</sup>H NMR of 9

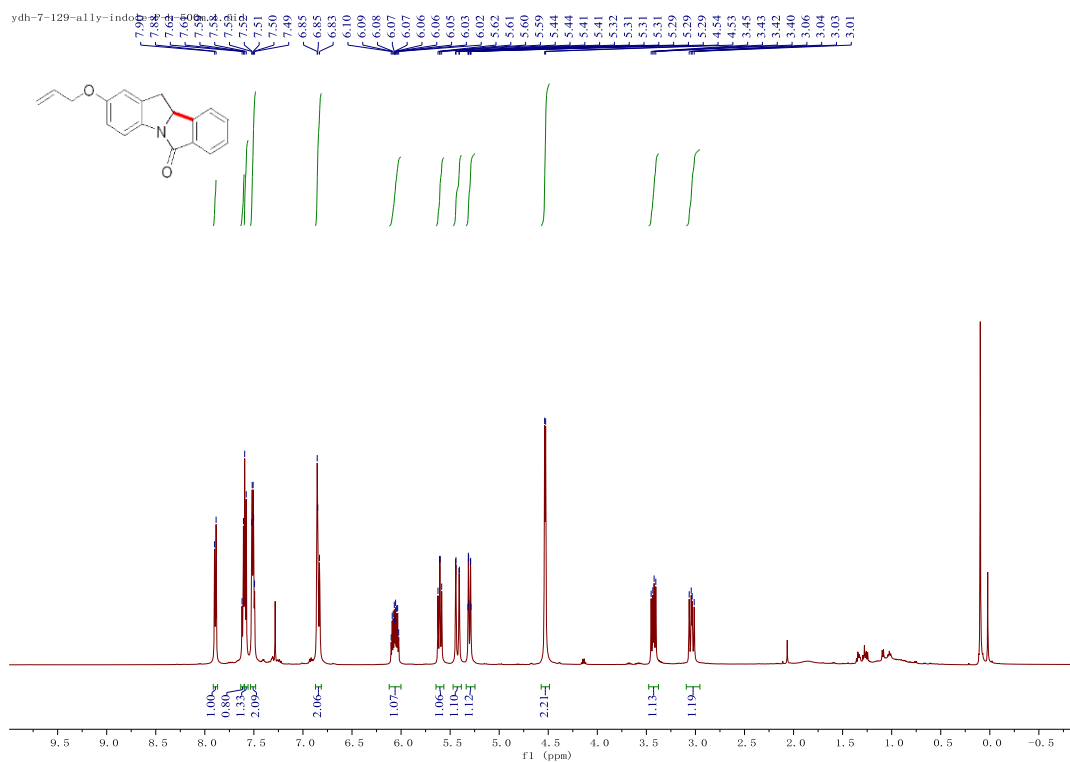

# <sup>13</sup>C NMR of 9

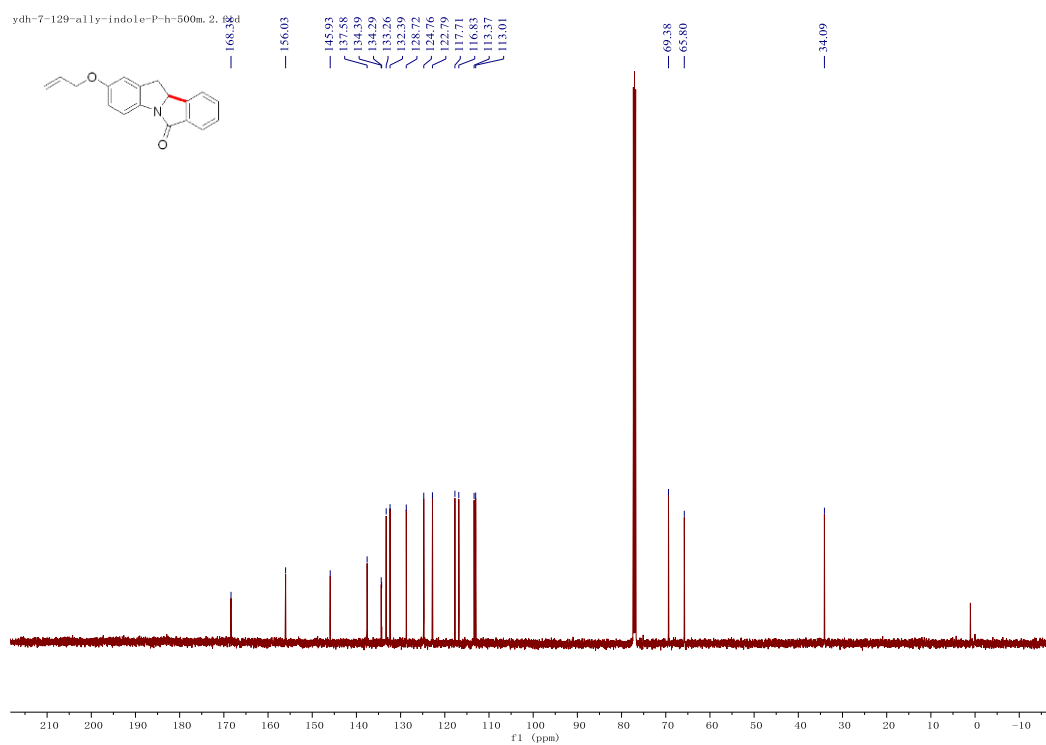

### <sup>1</sup>H NMR of 10

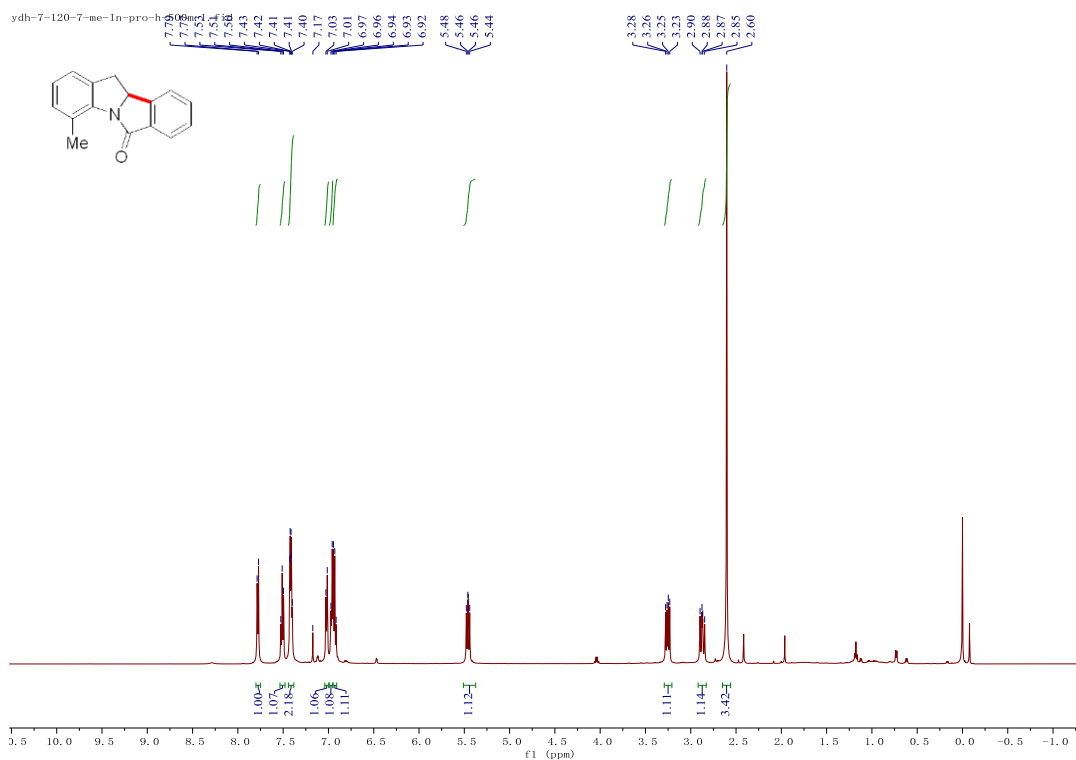

### <sup>13</sup>C NMR of 10

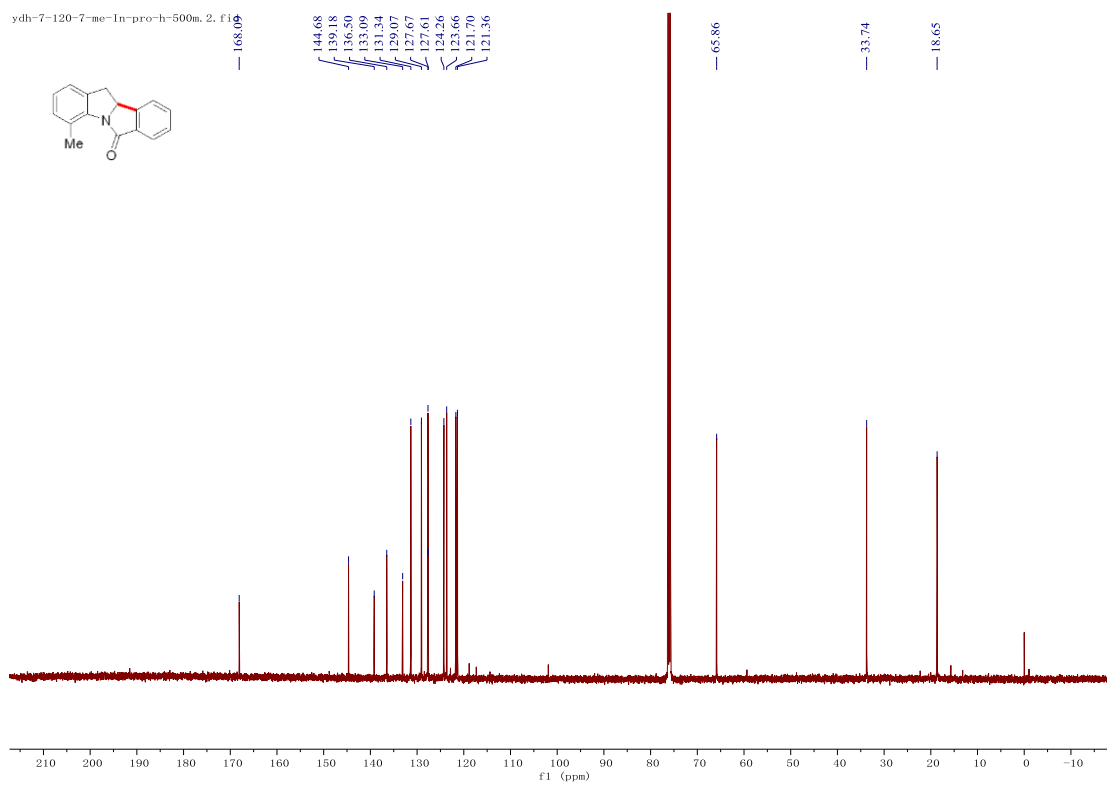

# <sup>1</sup>H NMR of 11

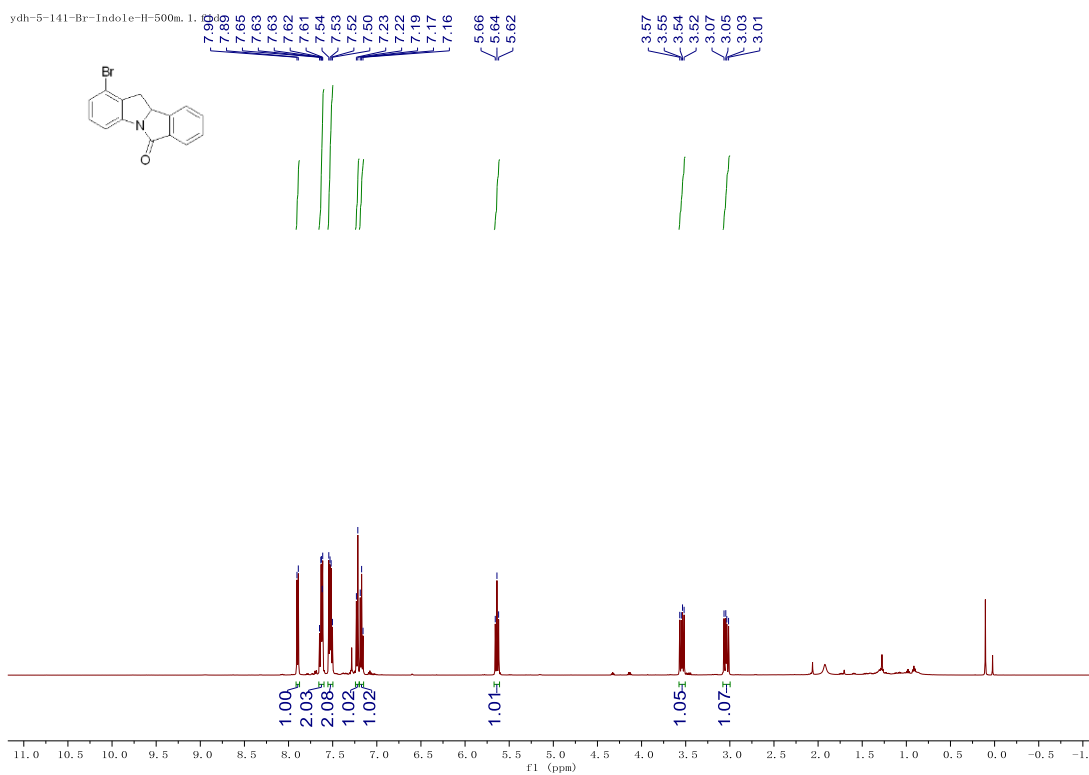

# <sup>13</sup>C NMR of 11

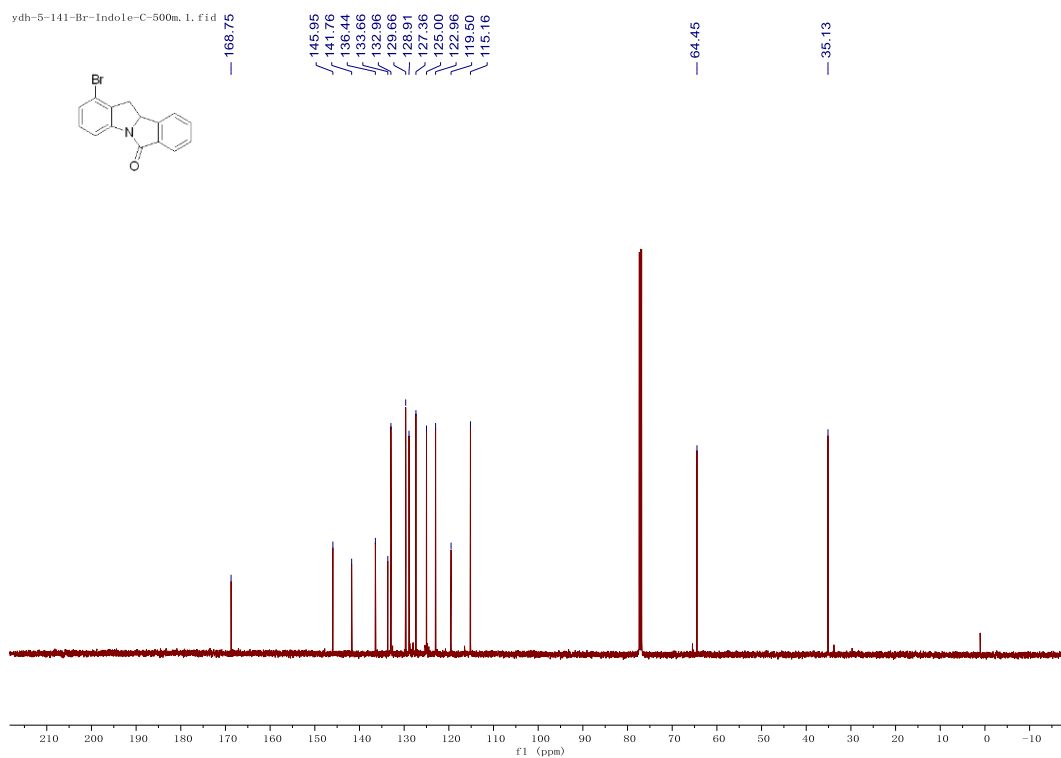



### <sup>1</sup>H NMR of 12

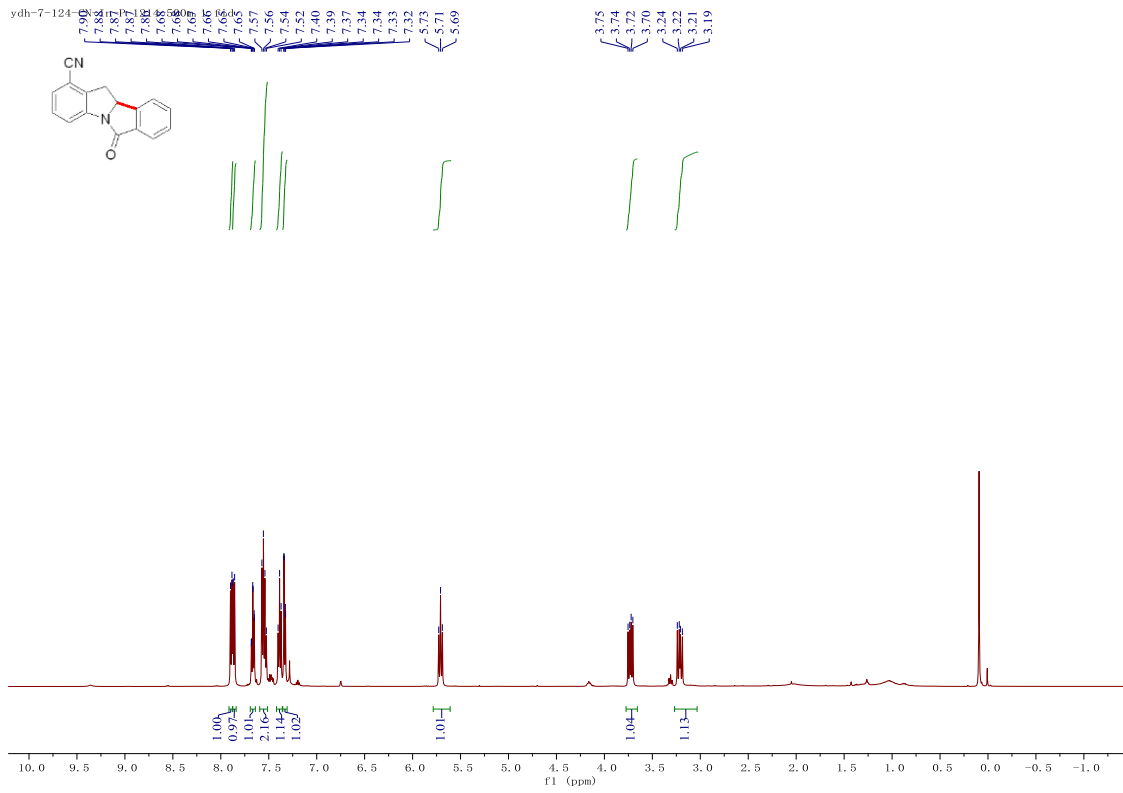

### <sup>13</sup>C NMR of 12

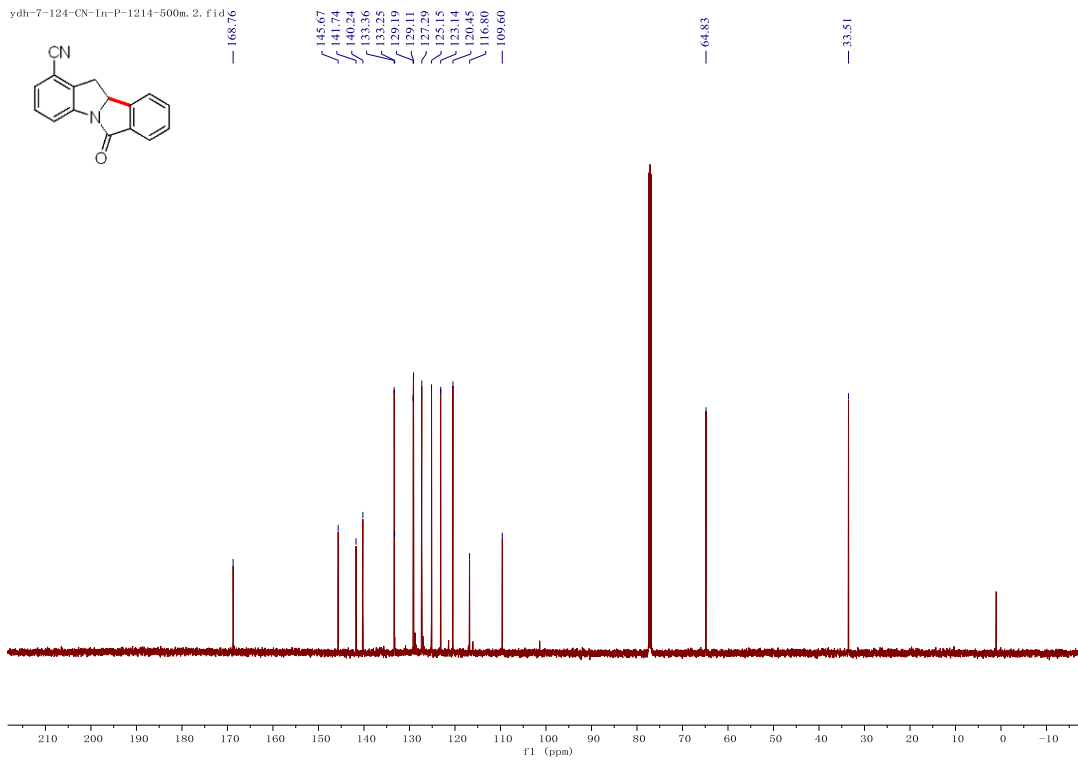

# <sup>1</sup>H NMR of 13

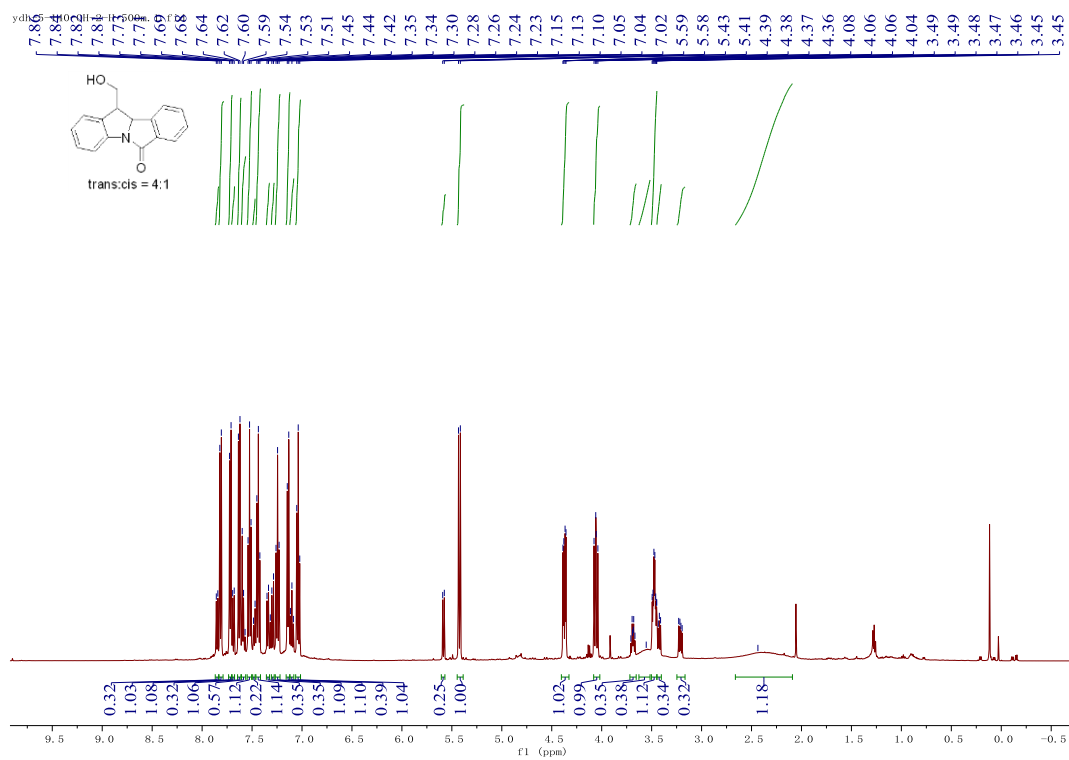

# <sup>13</sup>C NMR of 13

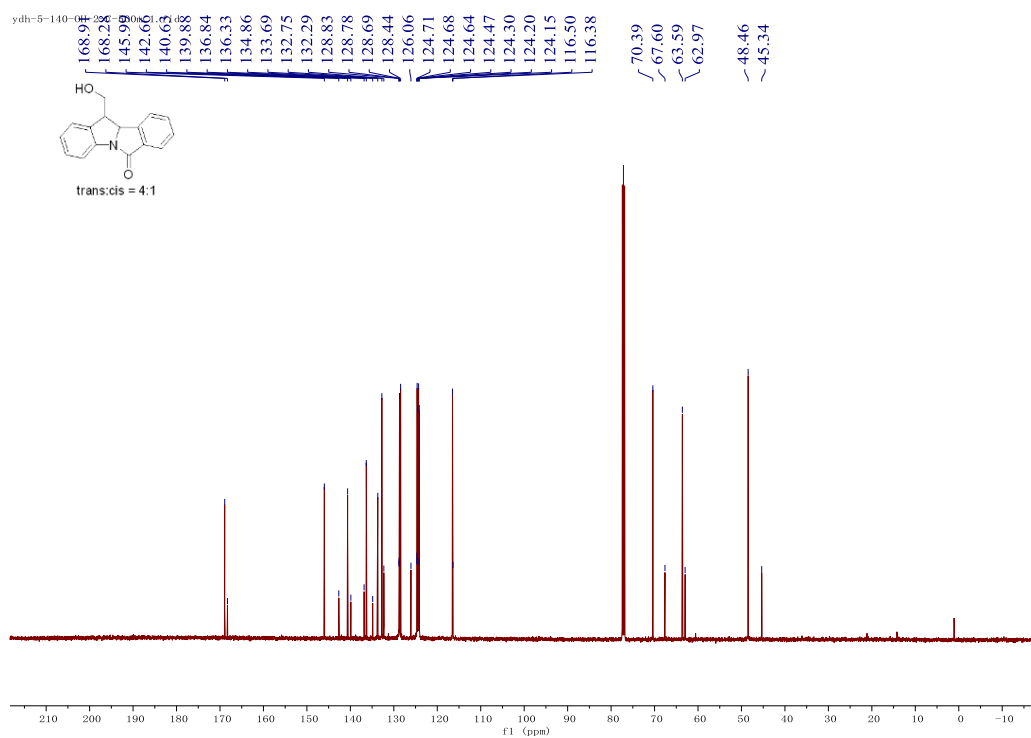

### <sup>1</sup>H NMR of 14

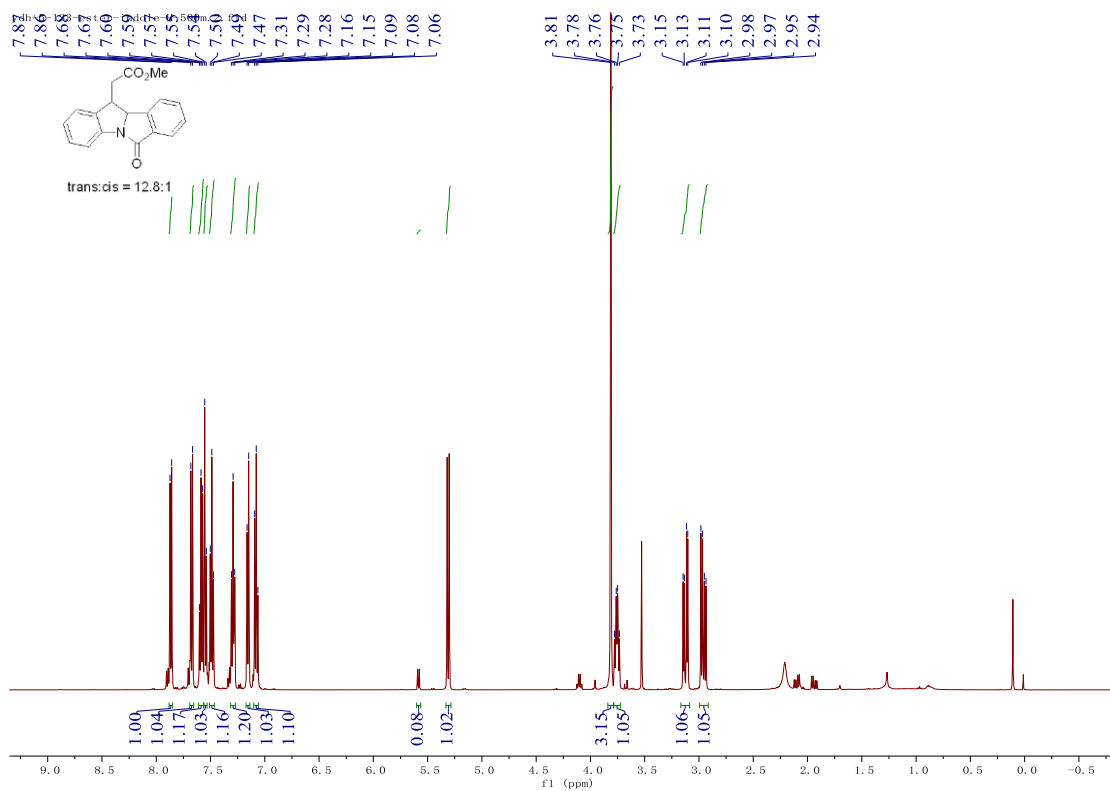

### <sup>13</sup>C NMR of 14

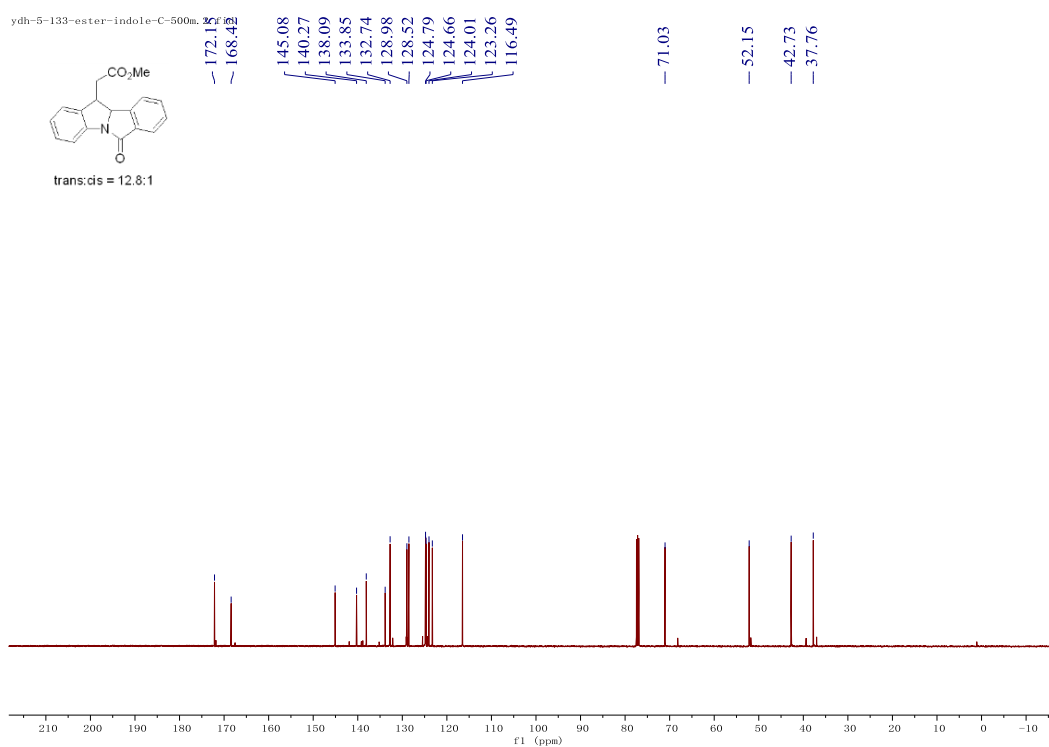

# <sup>1</sup>H NMR of 15

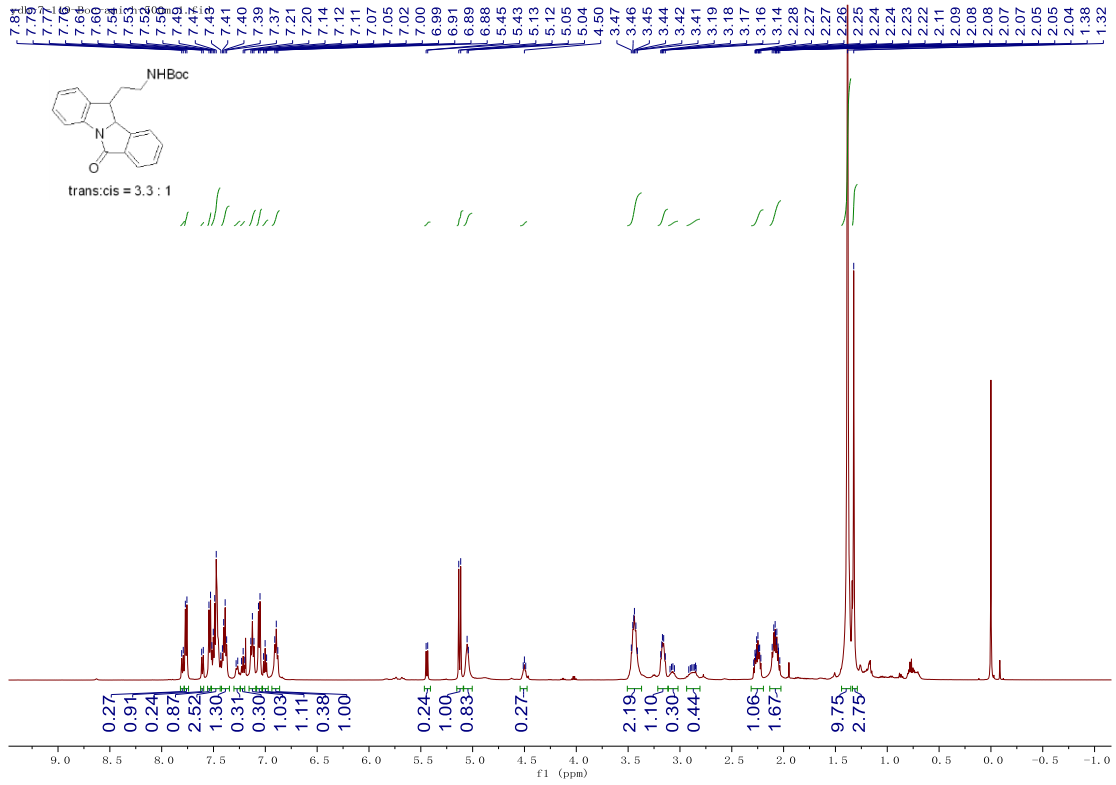

# <sup>13</sup>C NMR of 15

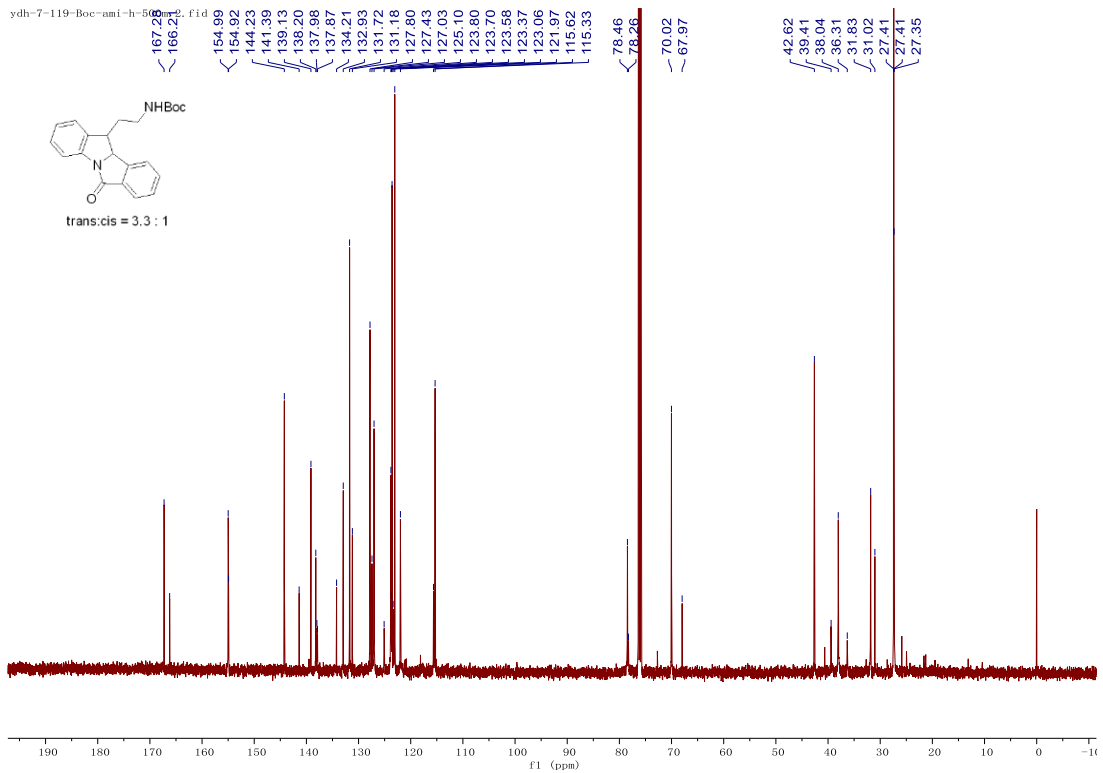

# <sup>1</sup>H NMR of 16

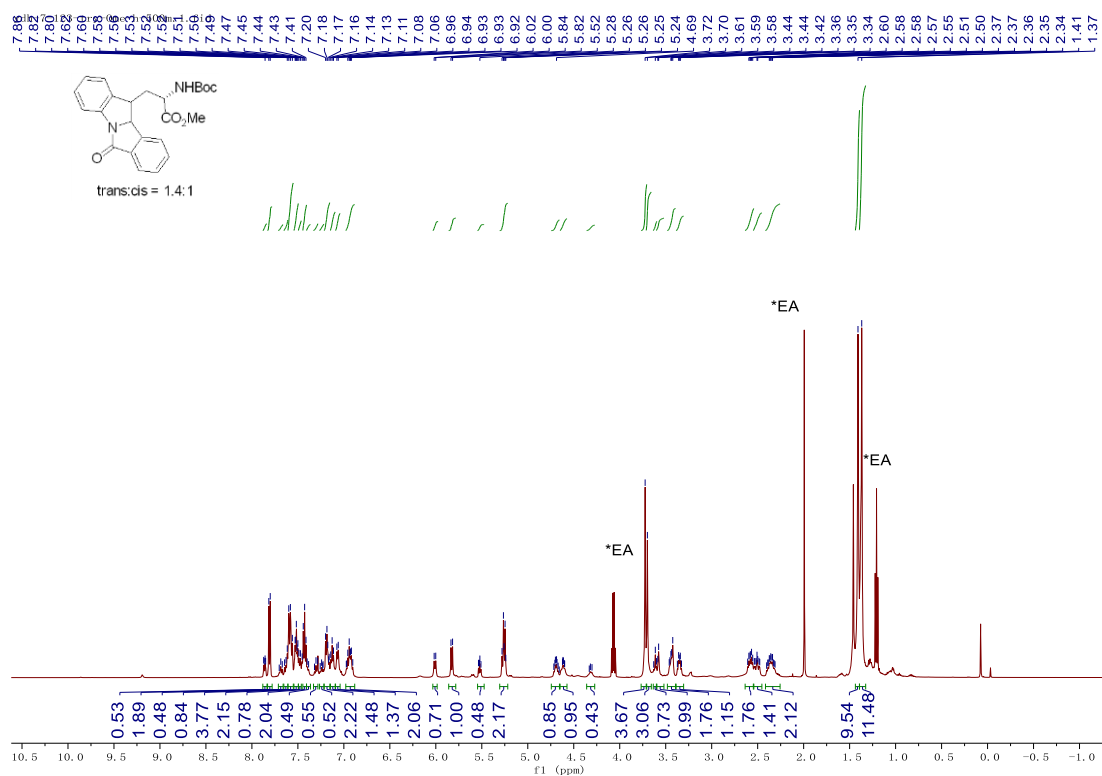

# <sup>13</sup>C NMR of 16

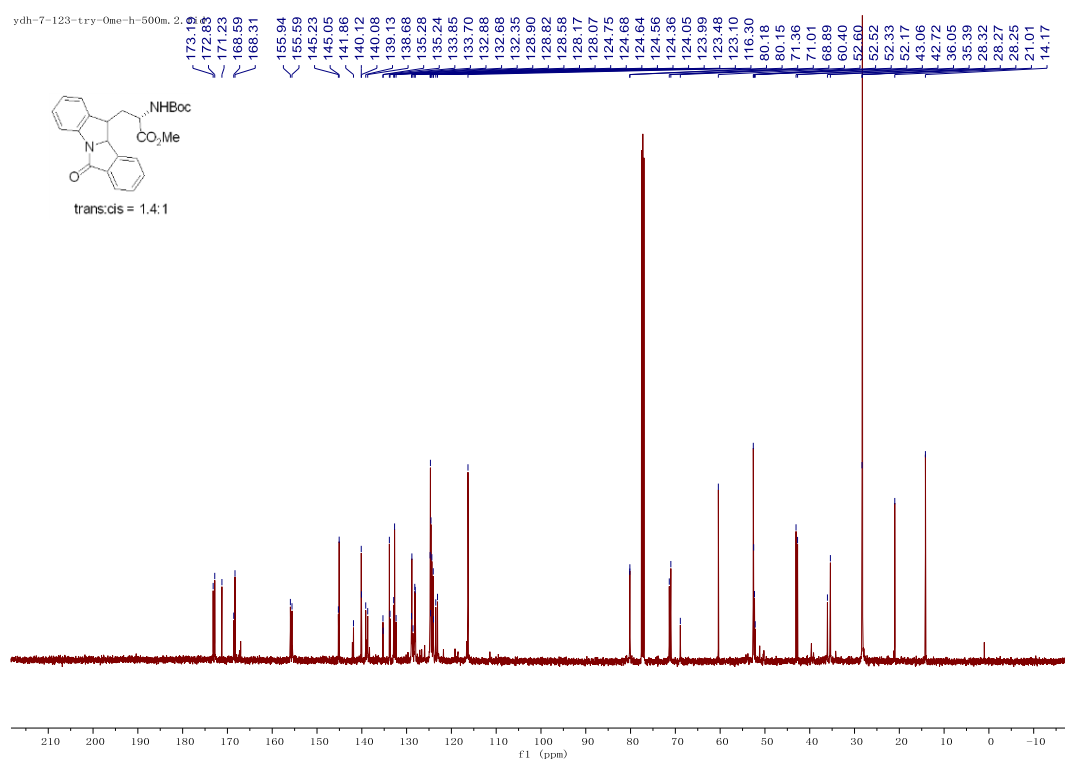

### <sup>1</sup>H NMR of 17

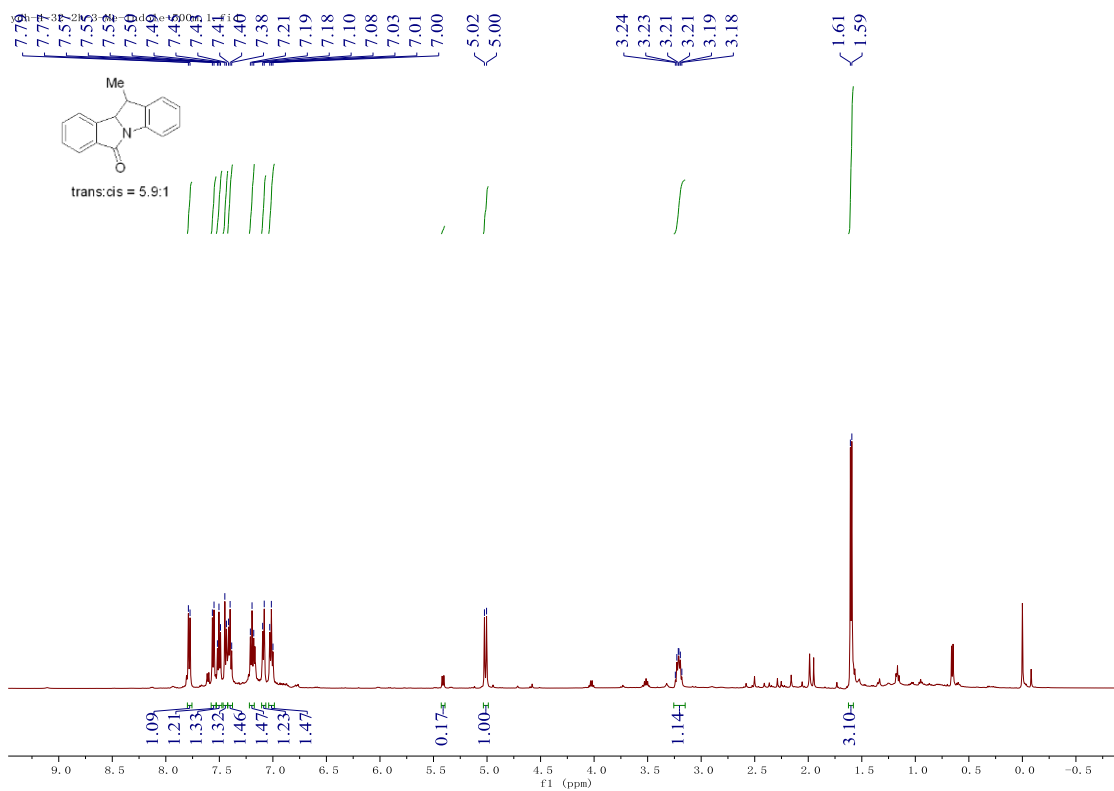

### <sup>13</sup>C NMR of 17

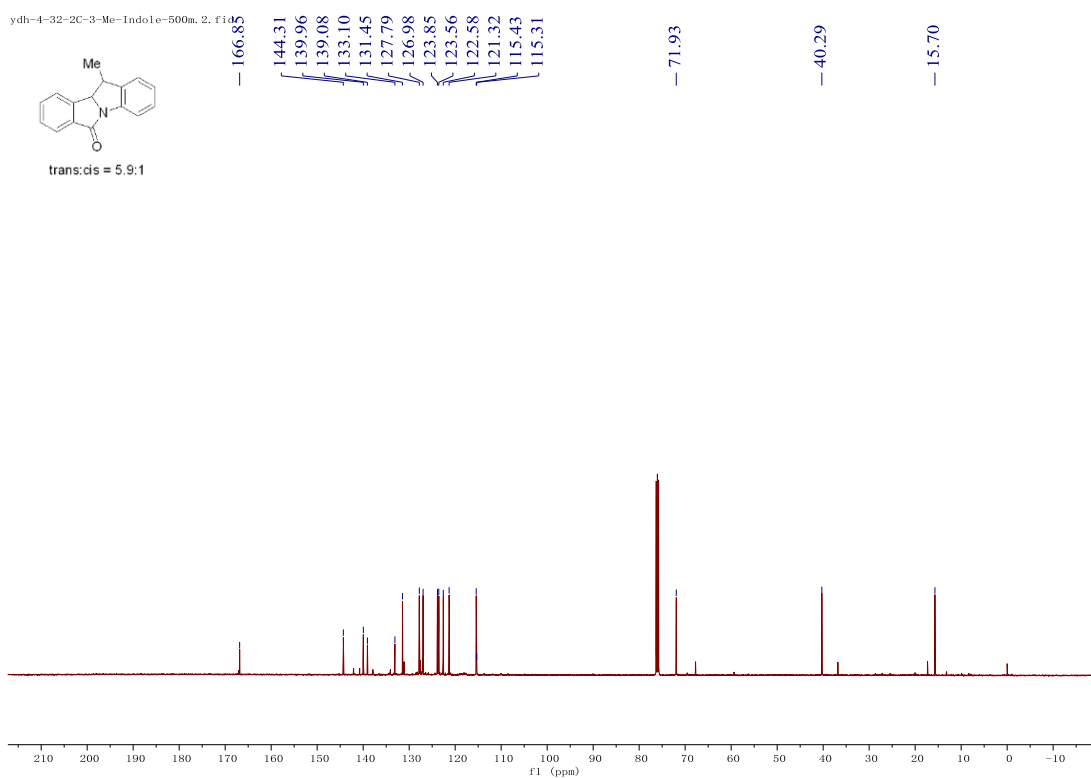

### <sup>1</sup>H NMR of 18

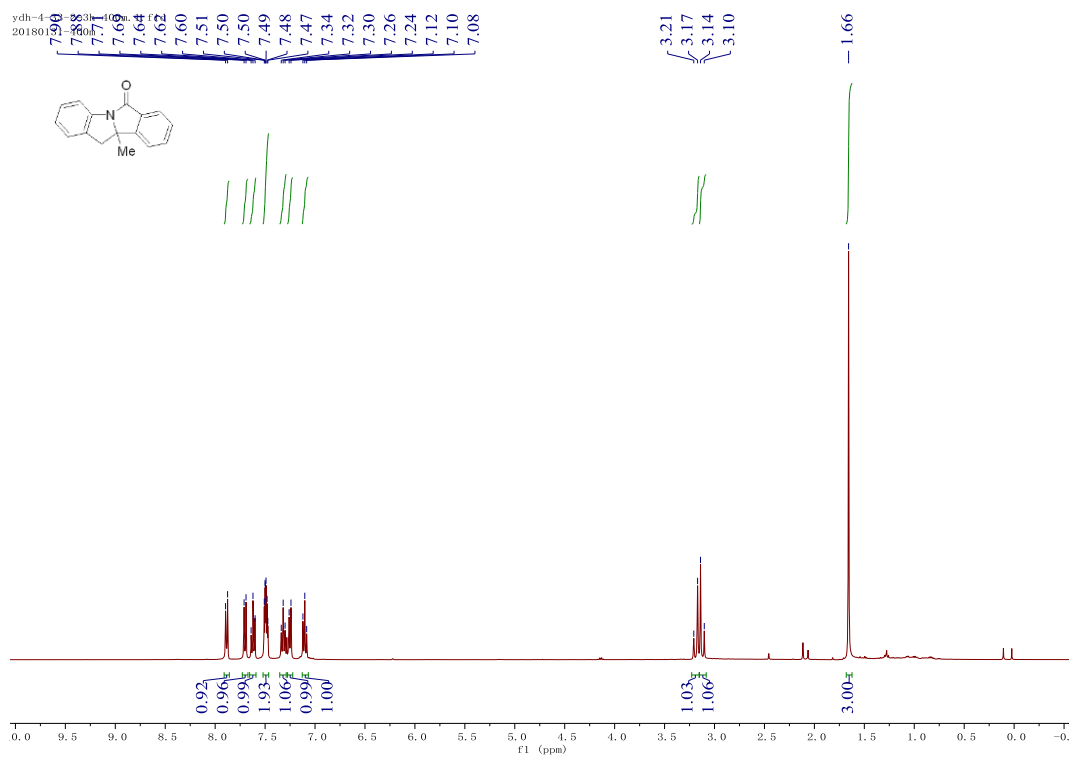

### <sup>13</sup>C NMR of 18

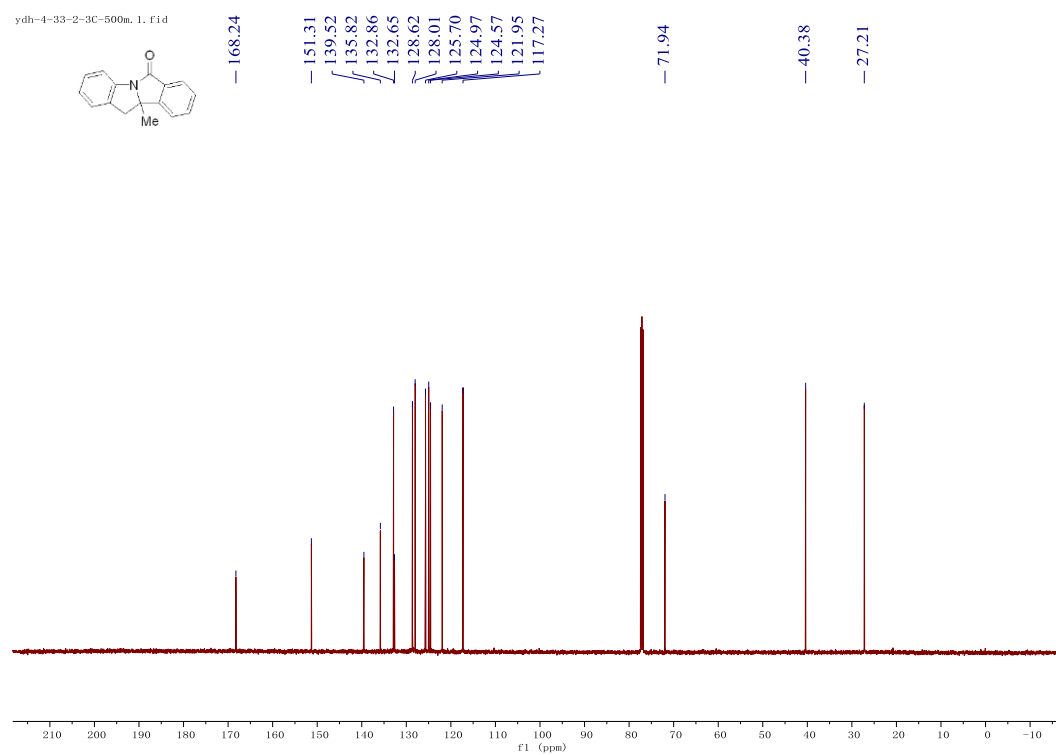

# <sup>1</sup>H NMR of 19

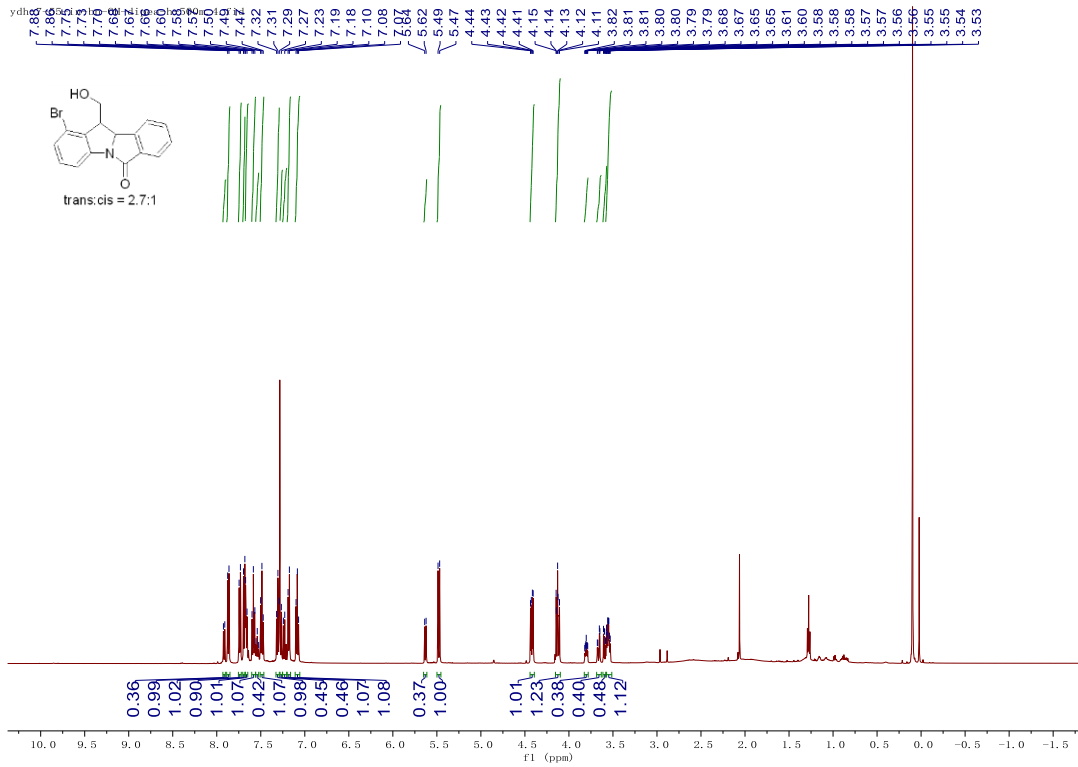

# <sup>13</sup>C NMR of 19

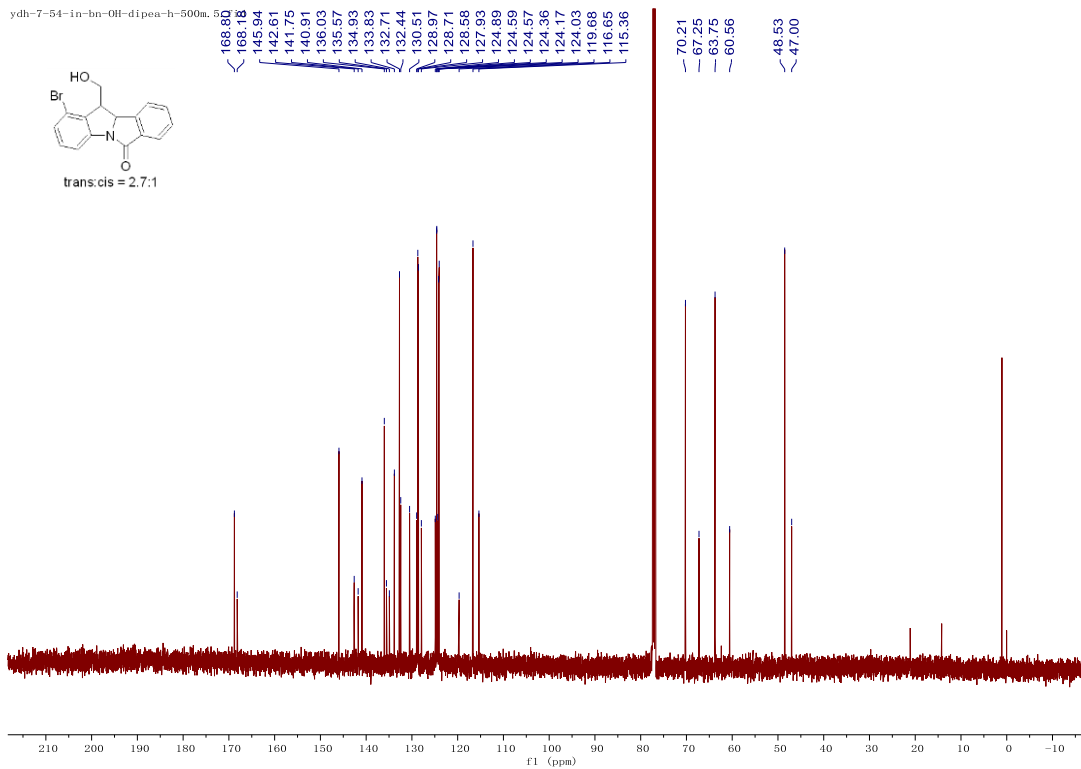



# <sup>1</sup>H NMR of 20

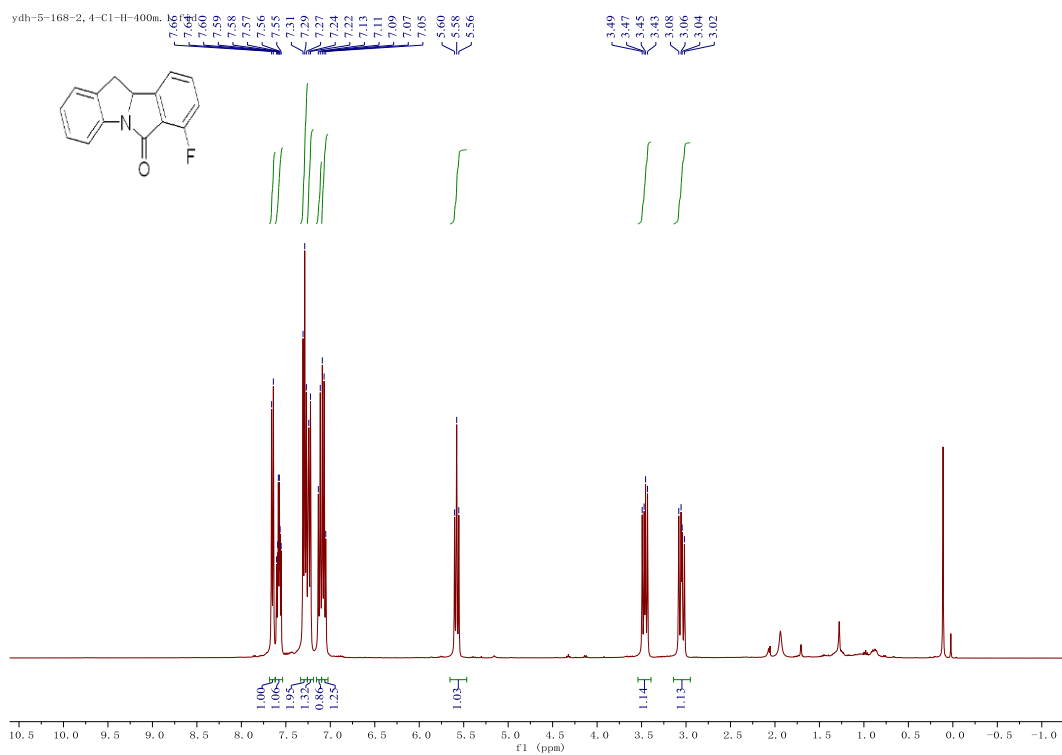

# <sup>19</sup>F NMR of 20

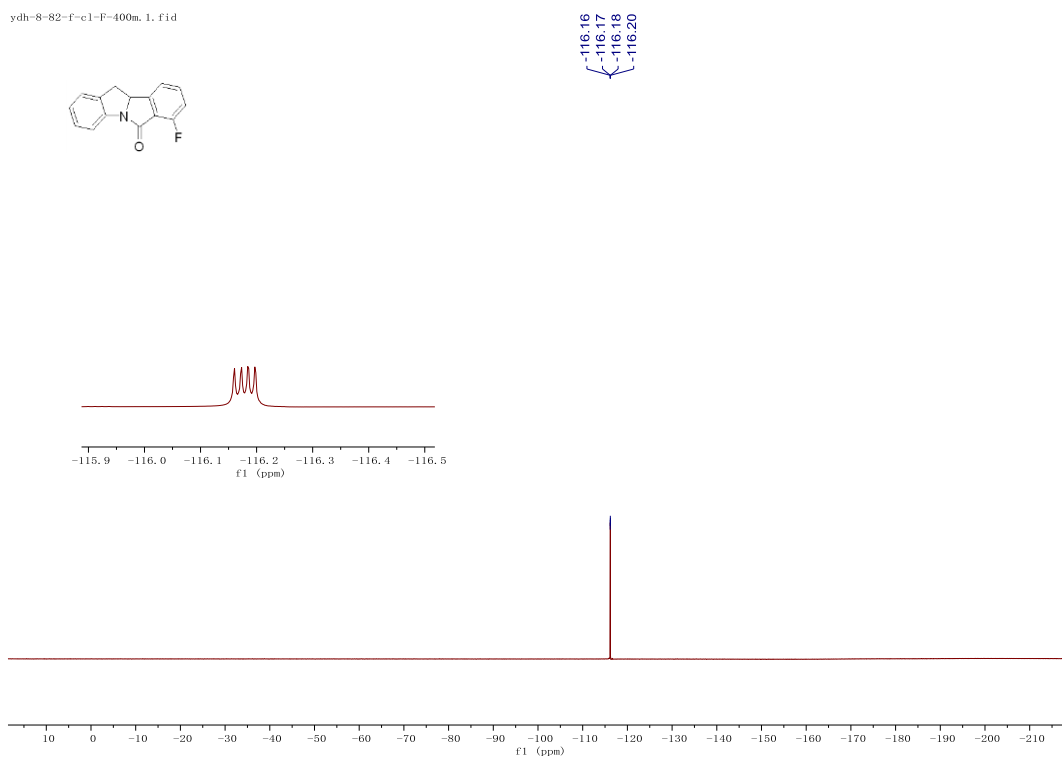

### <sup>13</sup>C NMR of 20

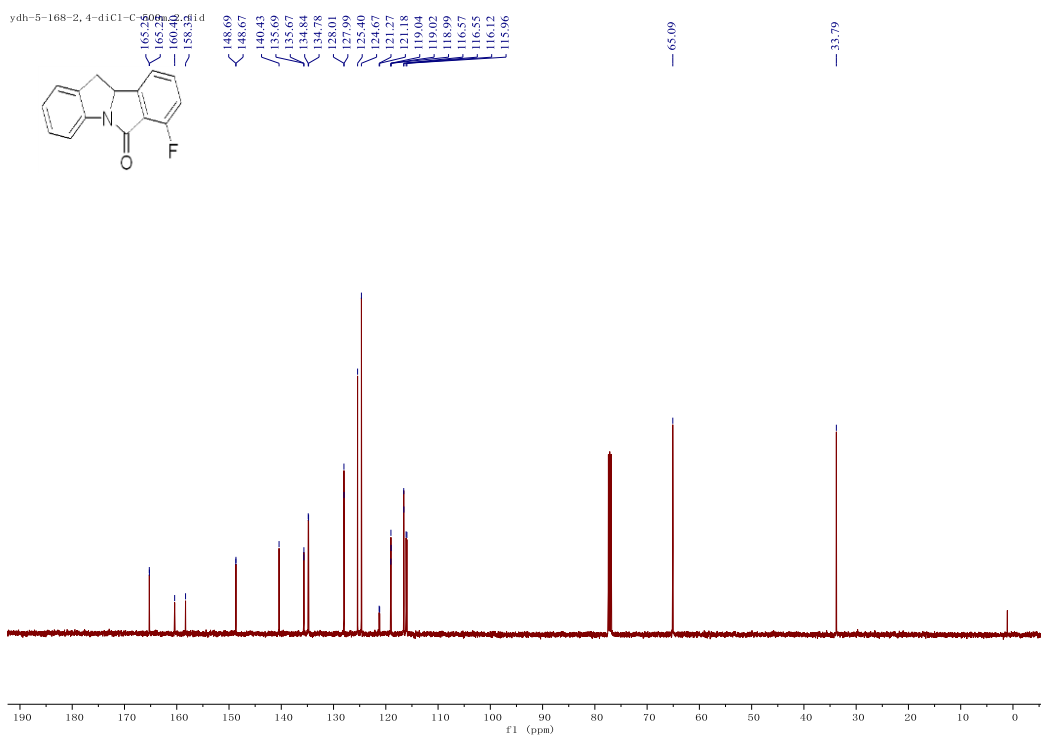

### <sup>1</sup>H NMR of 21

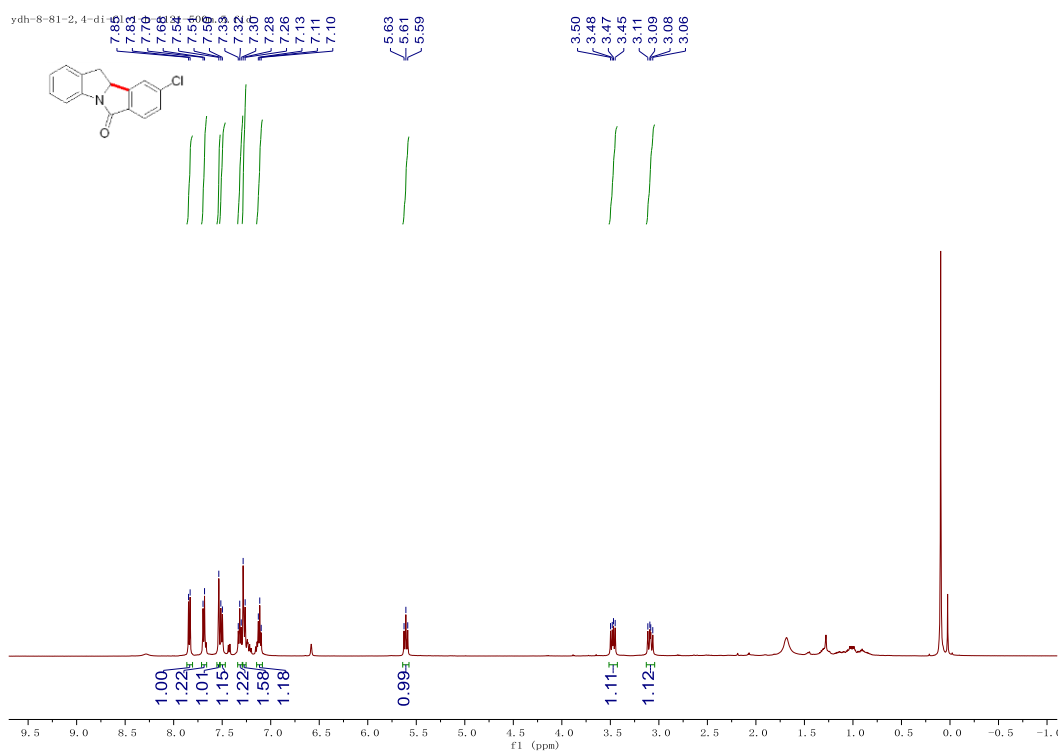

### <sup>13</sup>C NMR of 21

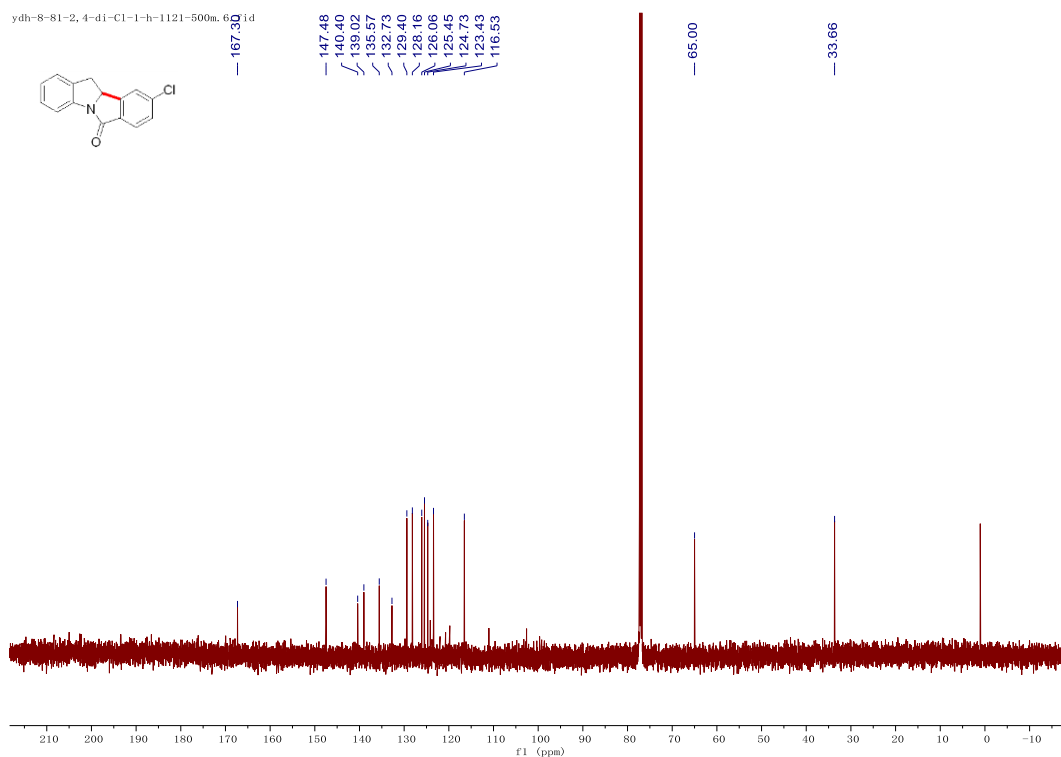

### <sup>1</sup>H NMR of 22

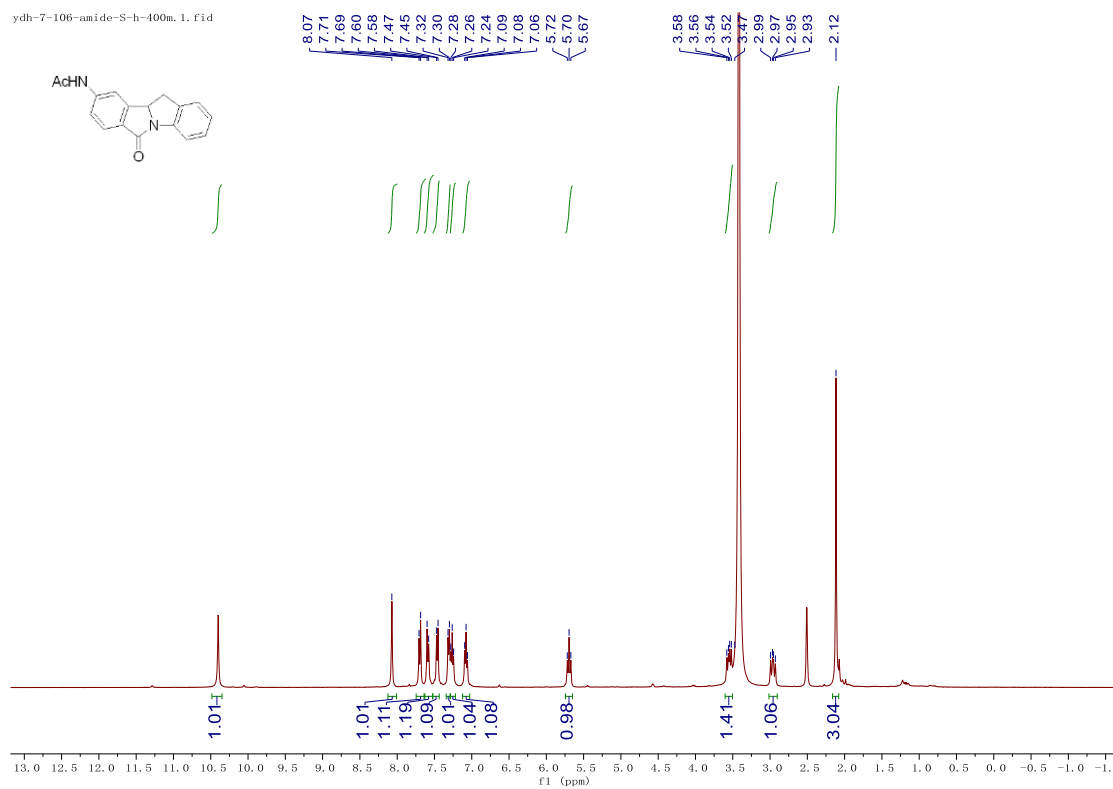

### <sup>13</sup>C NMR of 22

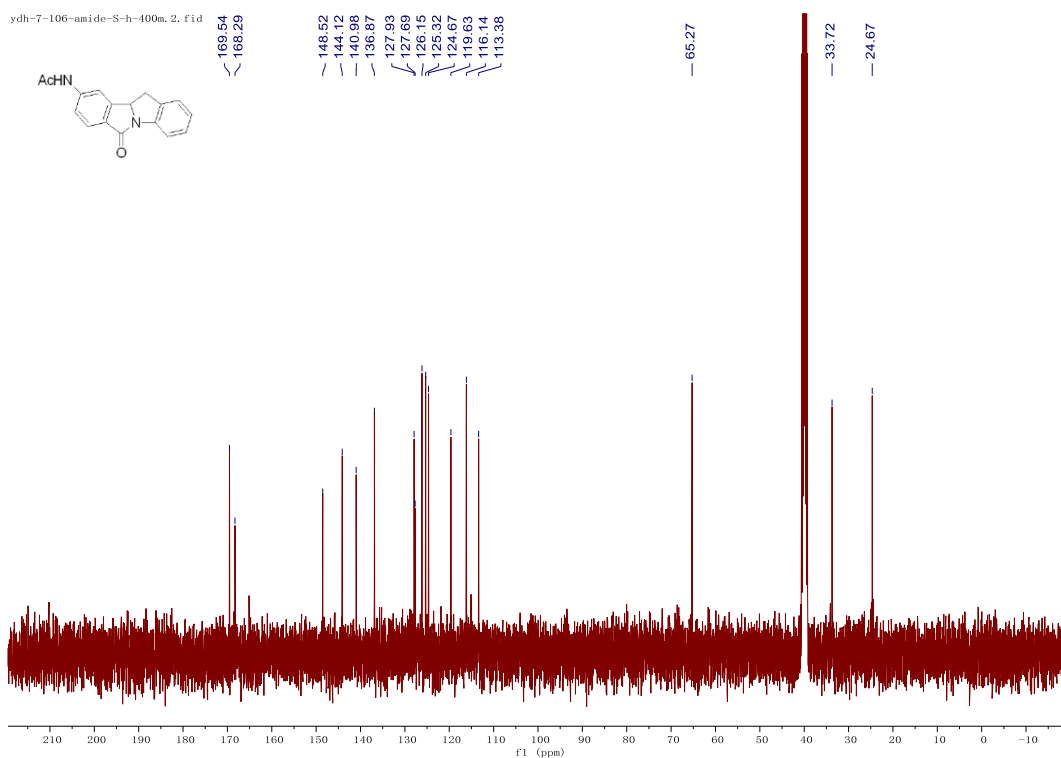

### <sup>1</sup>H NMR of 23

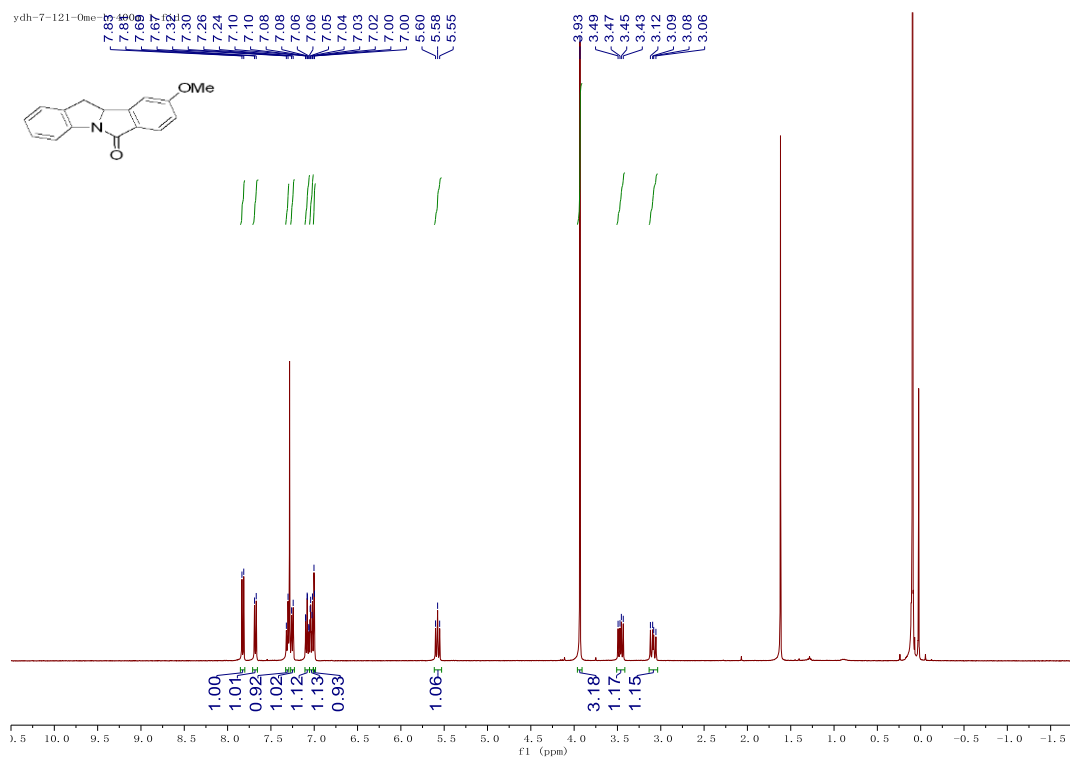

### <sup>13</sup>C NMR of 23

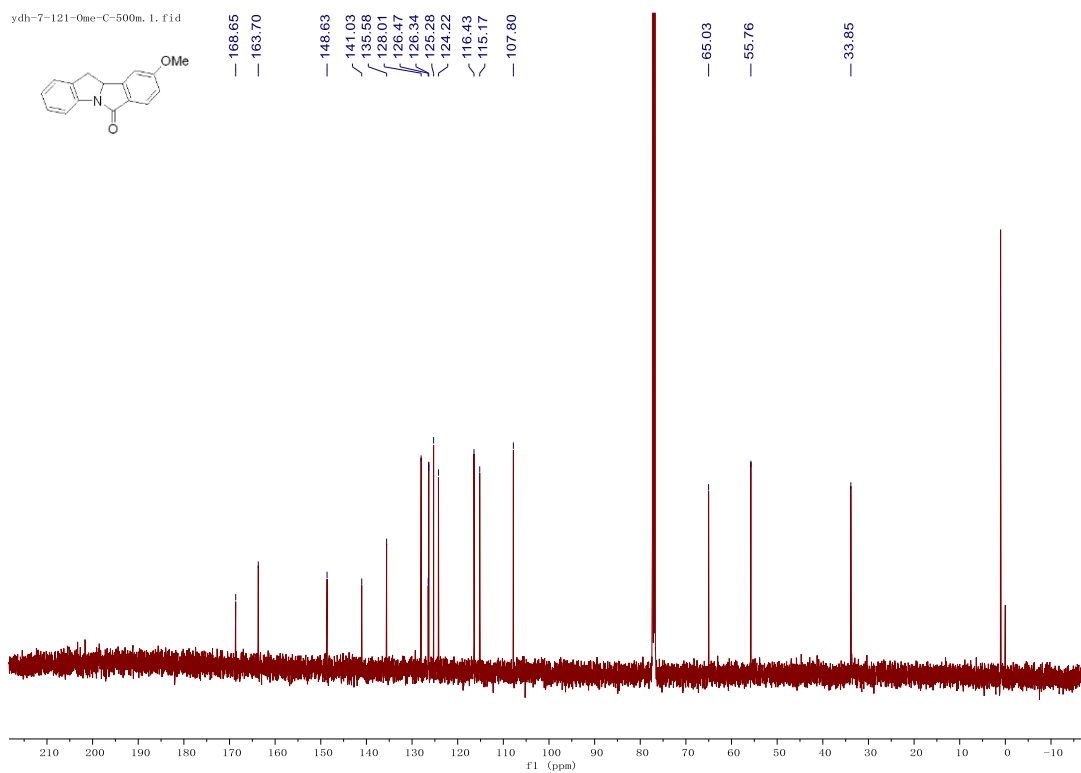

### <sup>1</sup>H NMR of 24

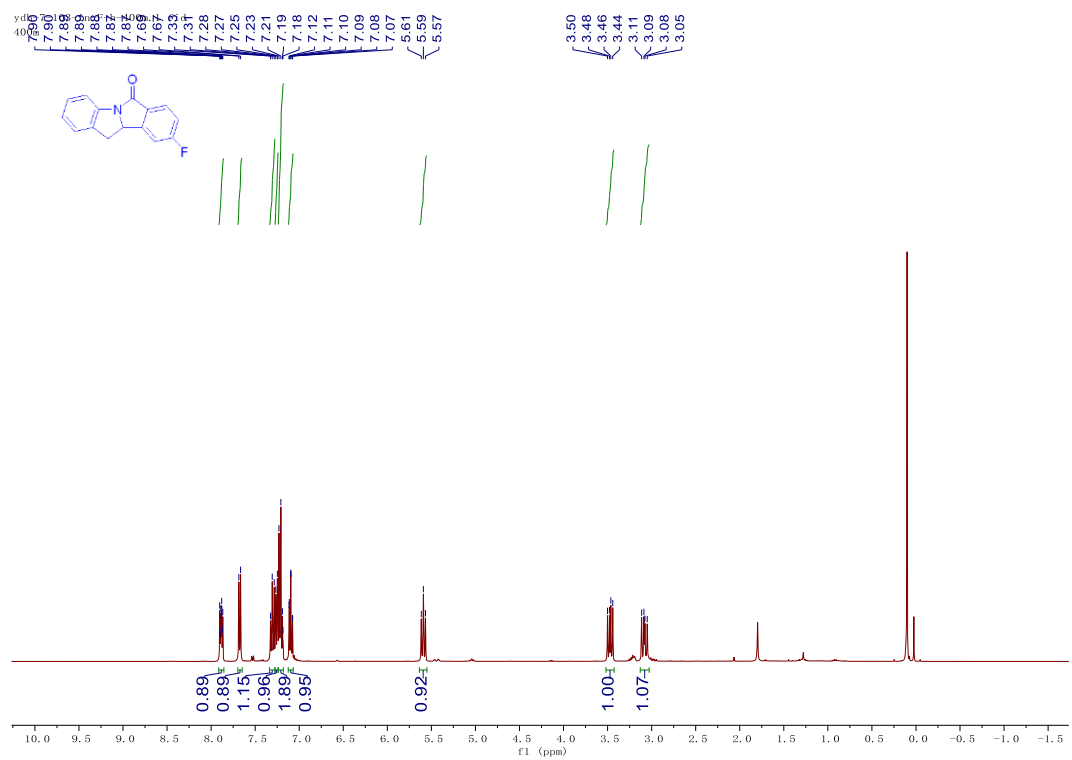

# <sup>19</sup>F NMR of 24

ydh-7-103-in-F-h-400m, 2, fid  
400m

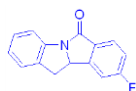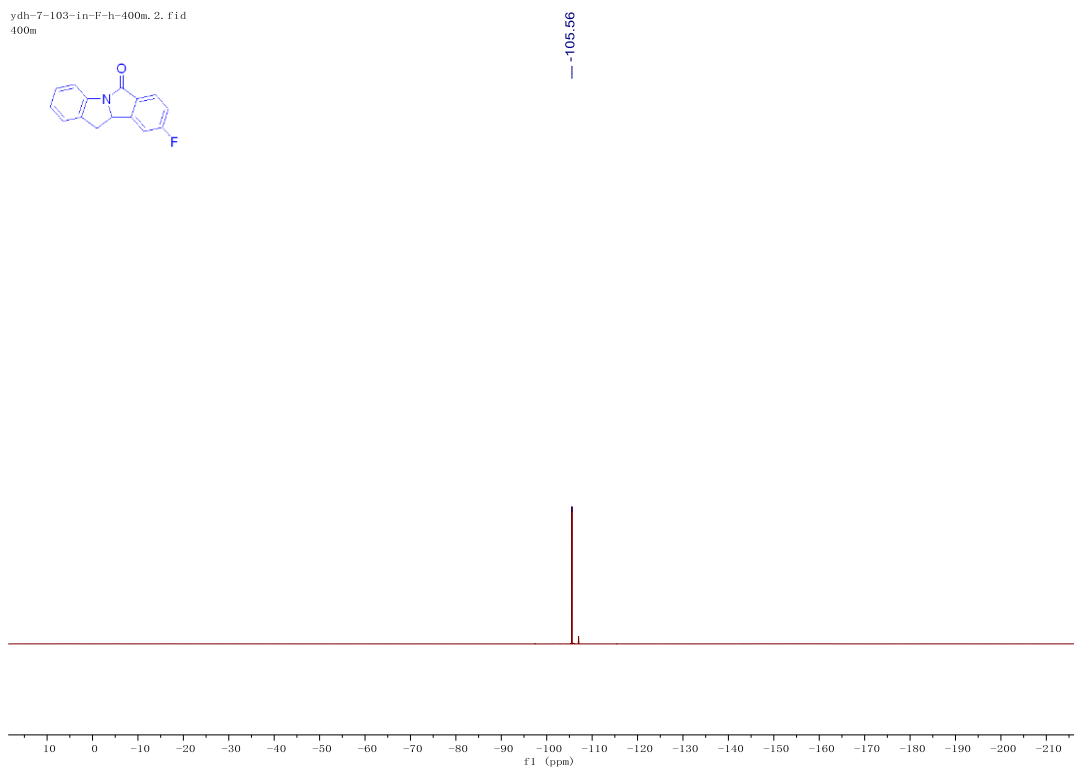

# <sup>13</sup>C NMR of 24

ydh-7-103-F-C-500m, 2, fid

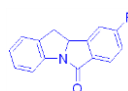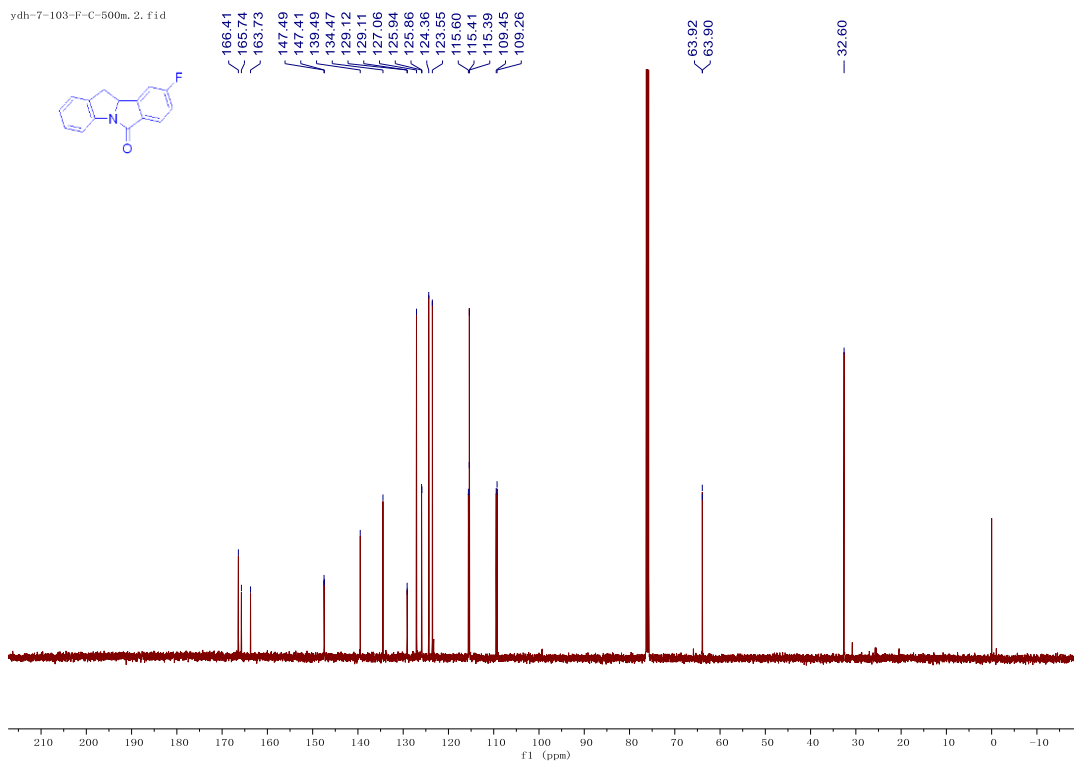

# <sup>1</sup>H NMR of 25

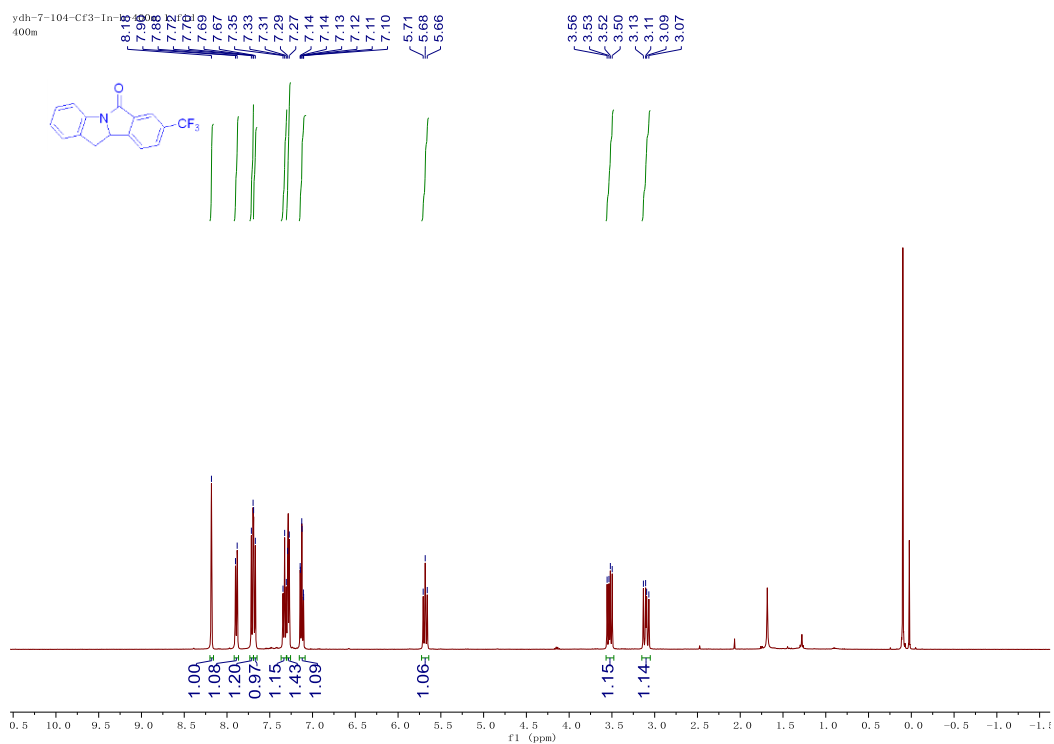

# <sup>19</sup>F NMR of 25

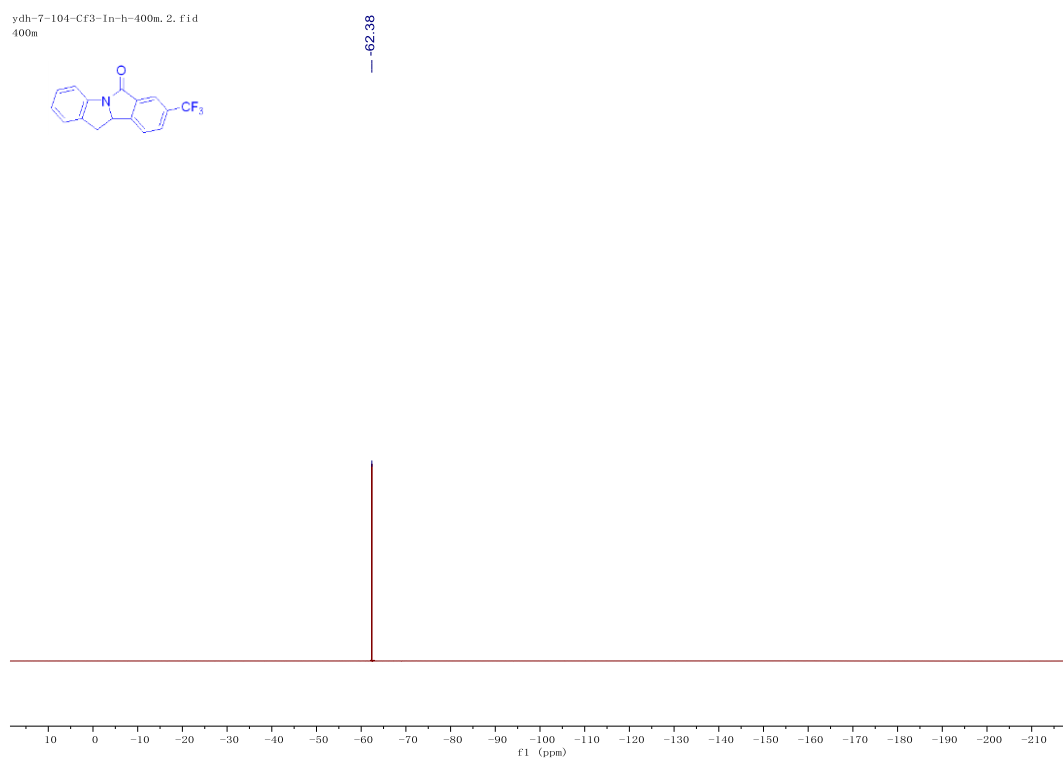

### <sup>13</sup>C NMR of 25

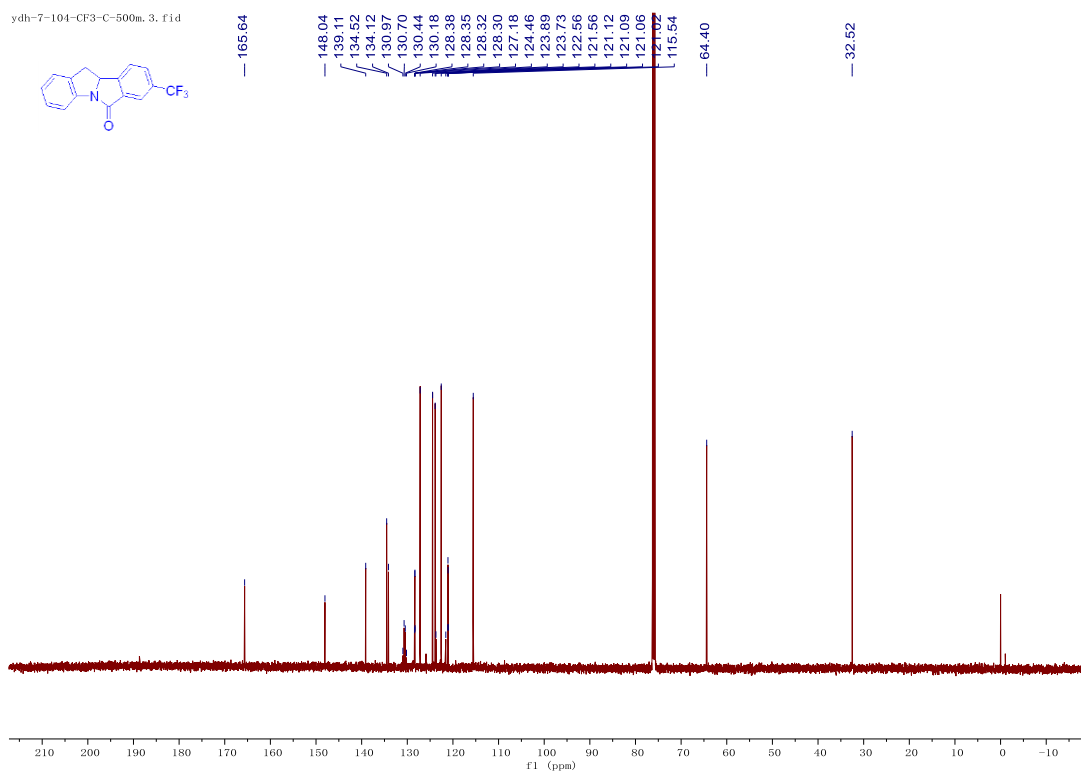

### <sup>1</sup>H NMR of 26

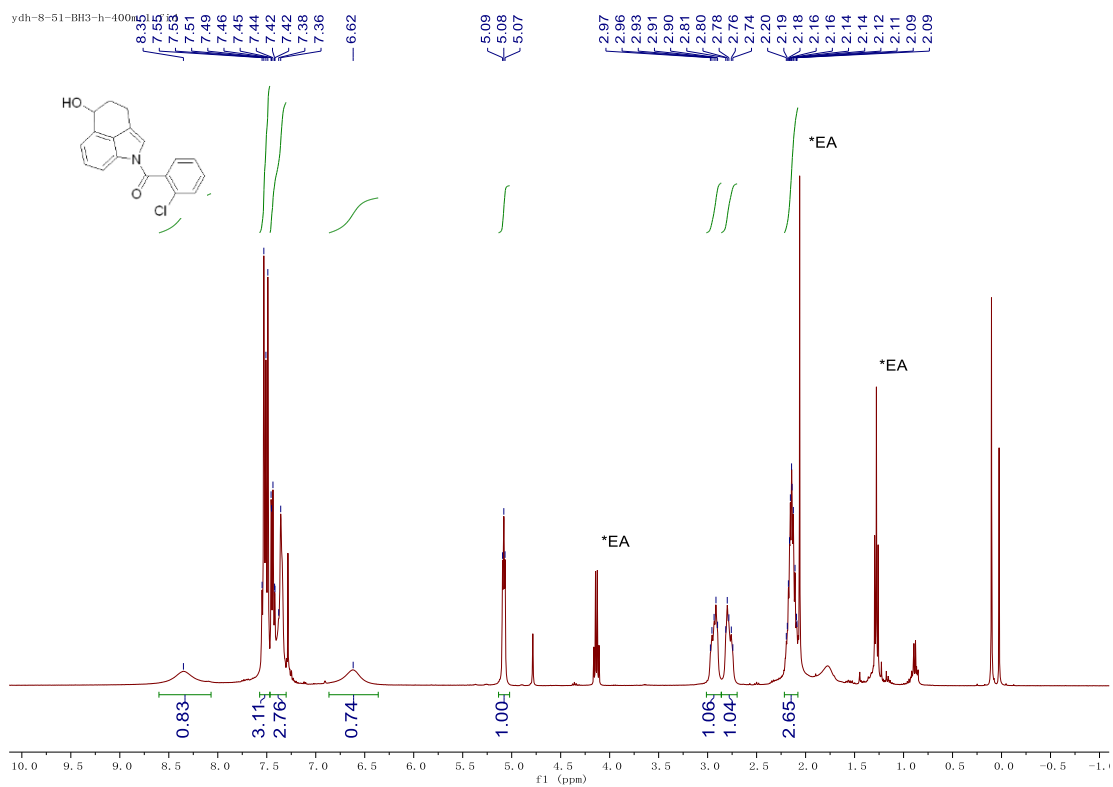



### <sup>13</sup>C NMR of 26

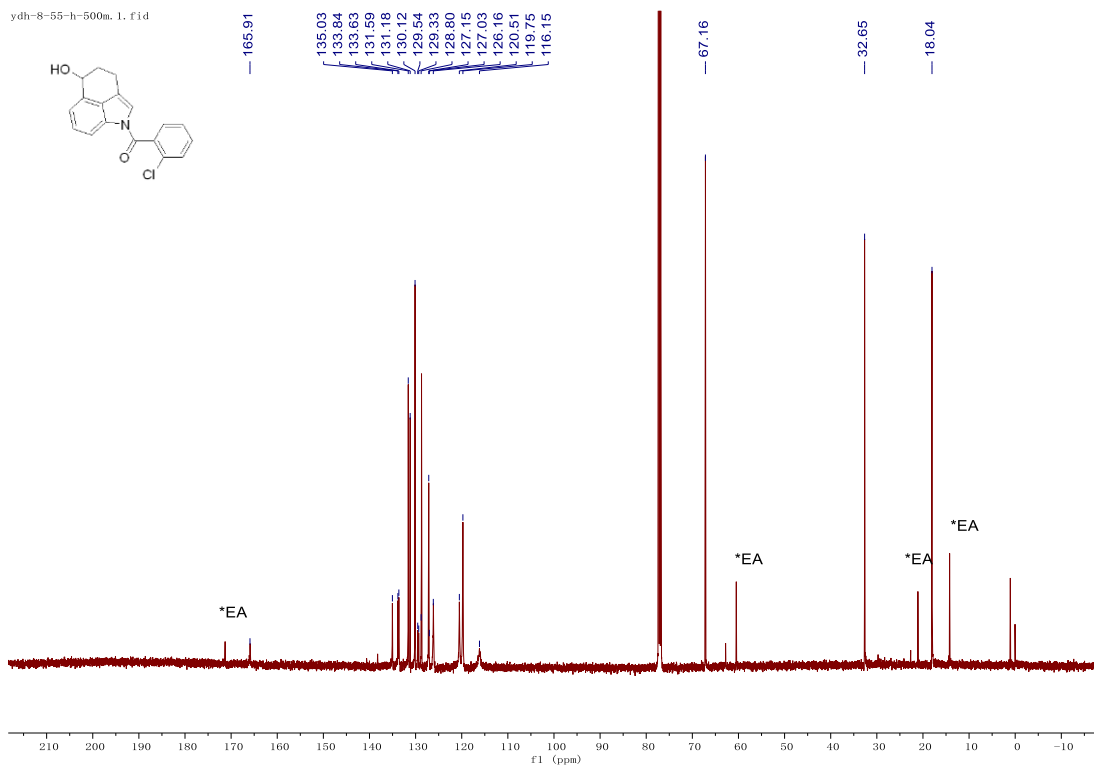

### <sup>1</sup>H NMR of 27

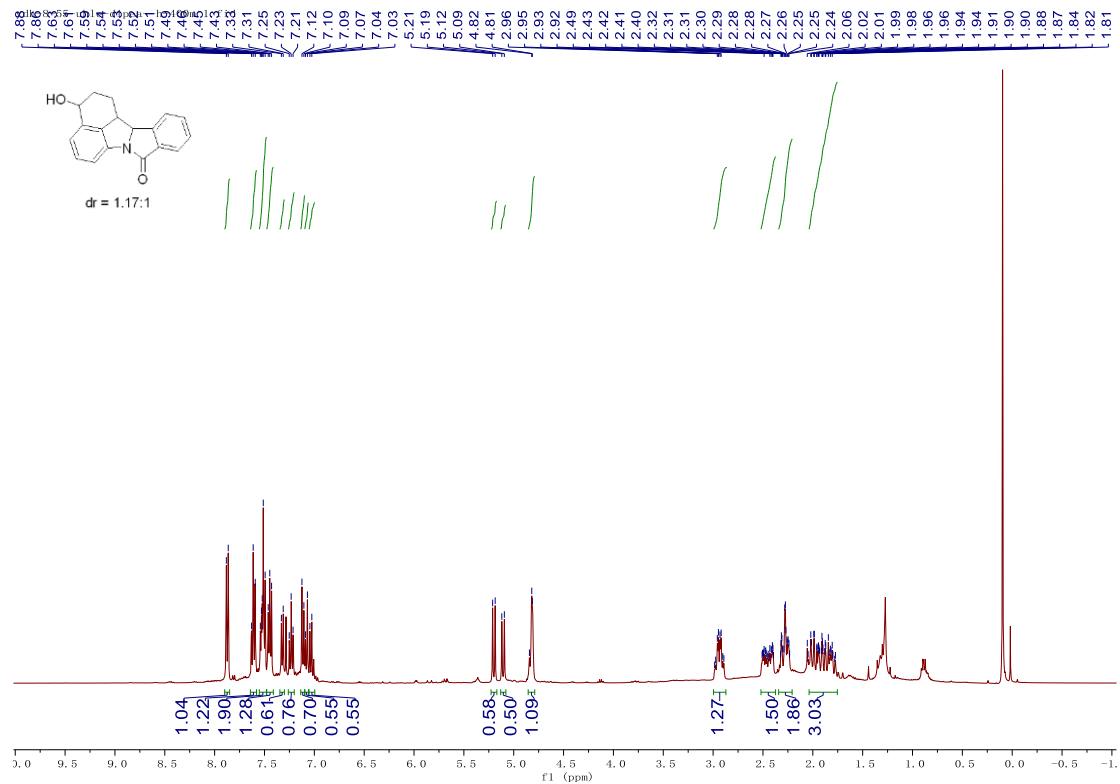

### <sup>13</sup>C NMR of 27

ydh-8-55-uh1e-dipea--h-400m. 2. f1d

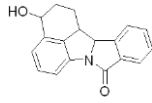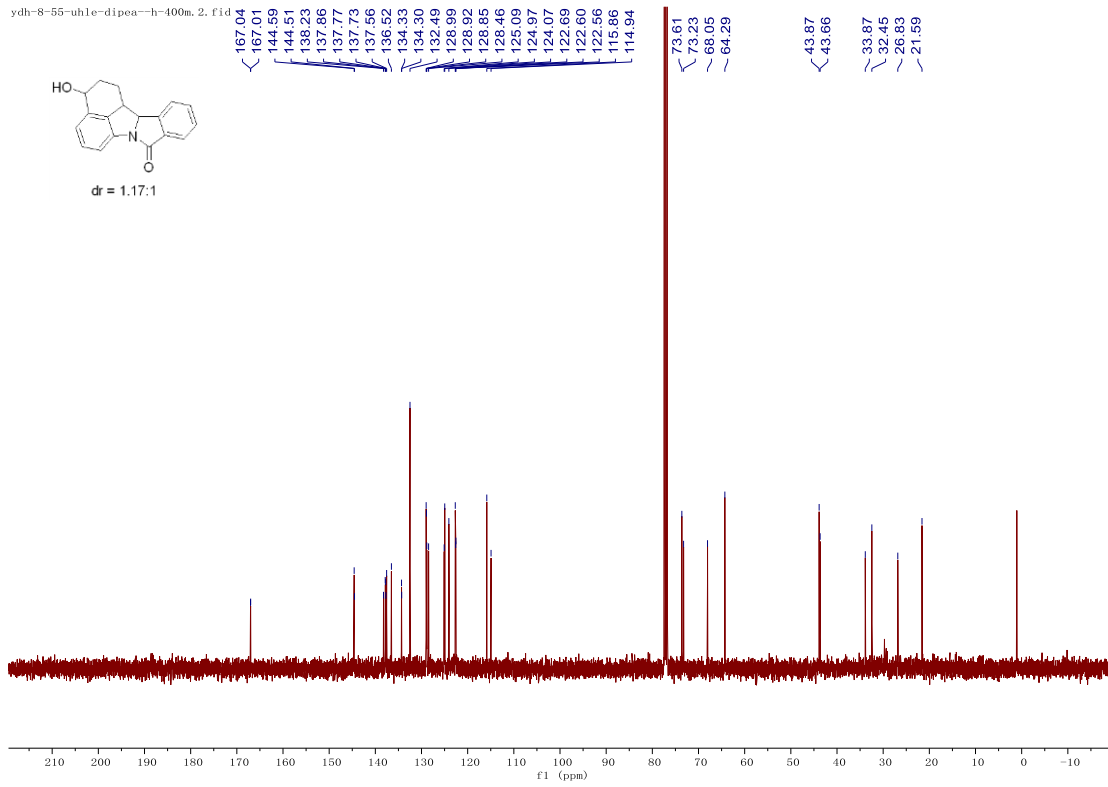

### <sup>1</sup>H NMR of 28

ydh-7-148-Me

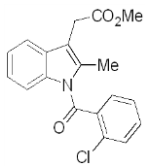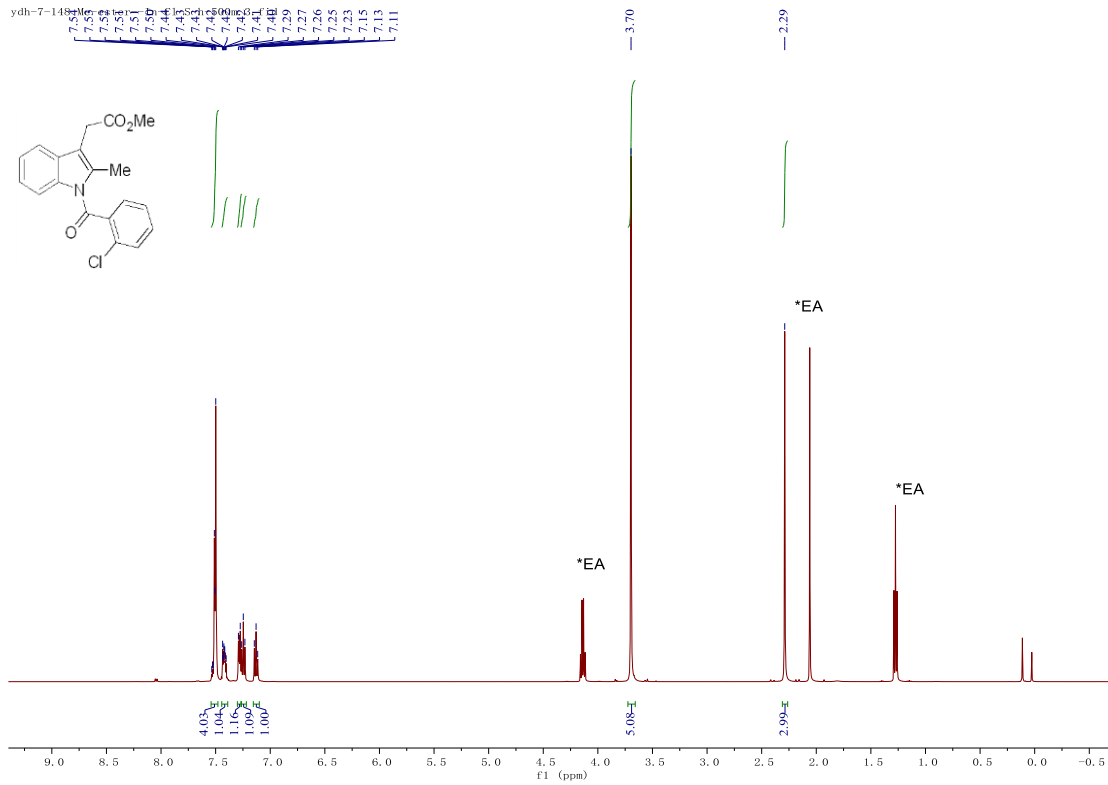

### <sup>13</sup>C NMR of 28

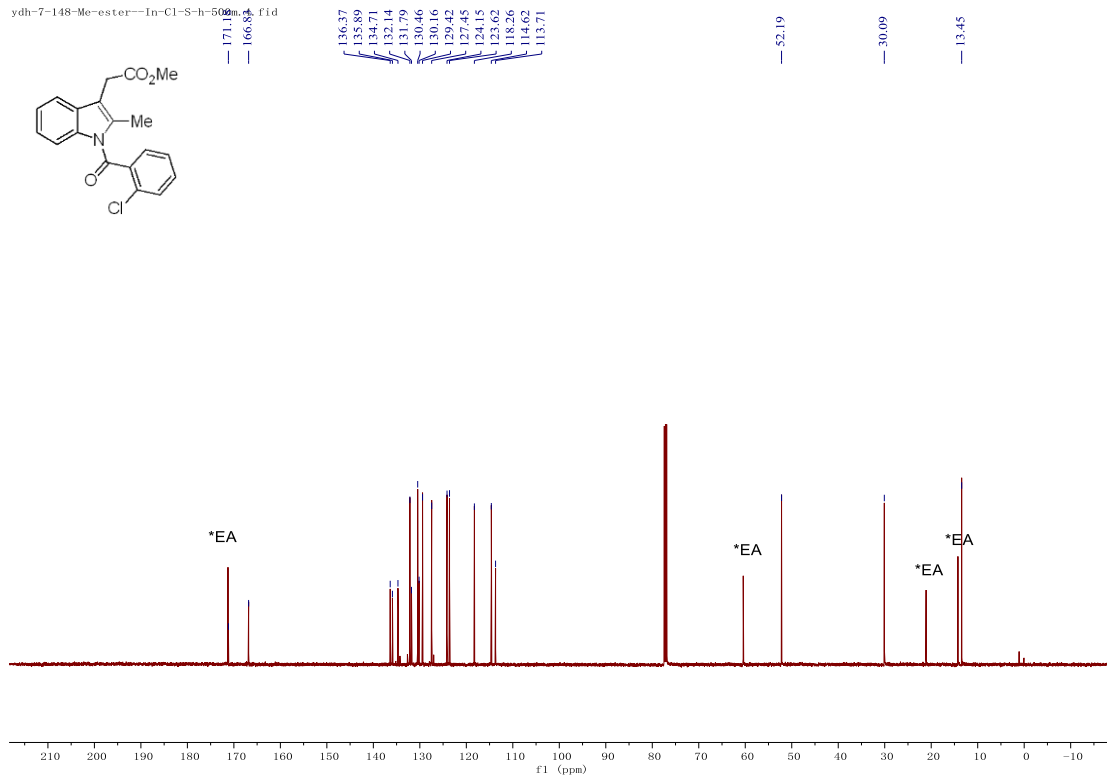

### <sup>1</sup>H NMR of 29

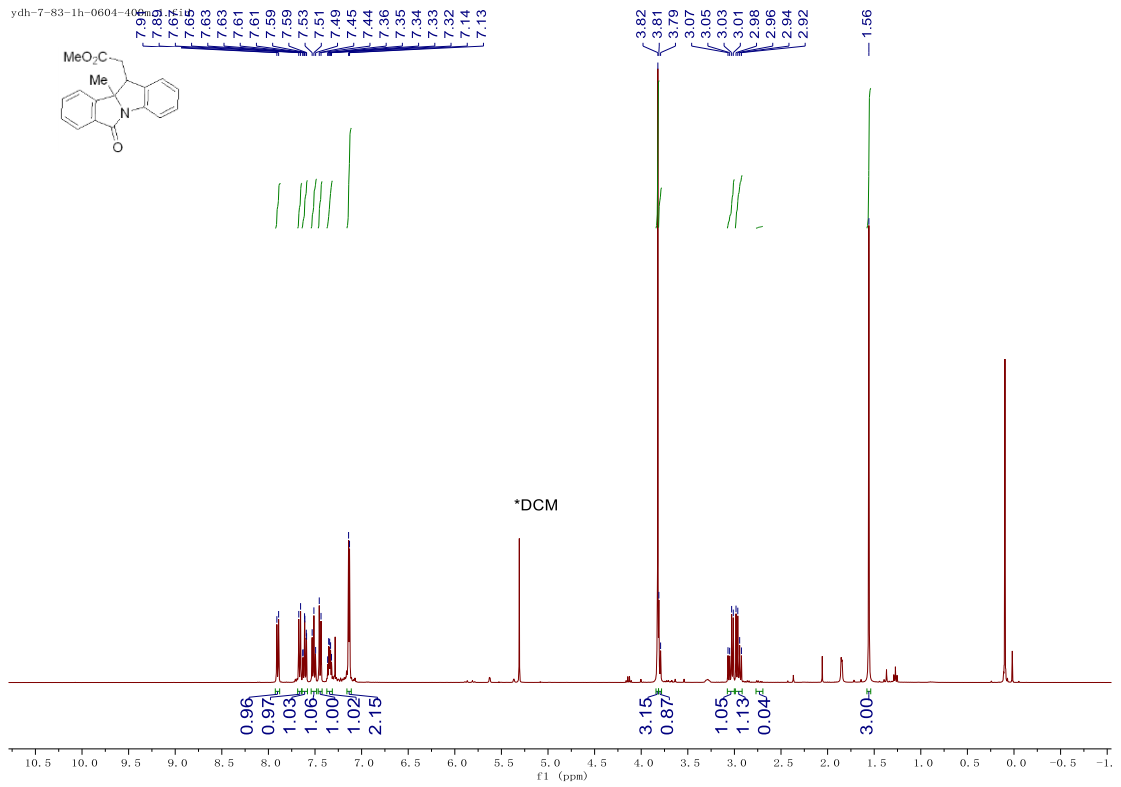

### <sup>13</sup>C NMR of 29

ydh-7-83-1h-0604-400m. 2. f1d

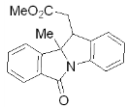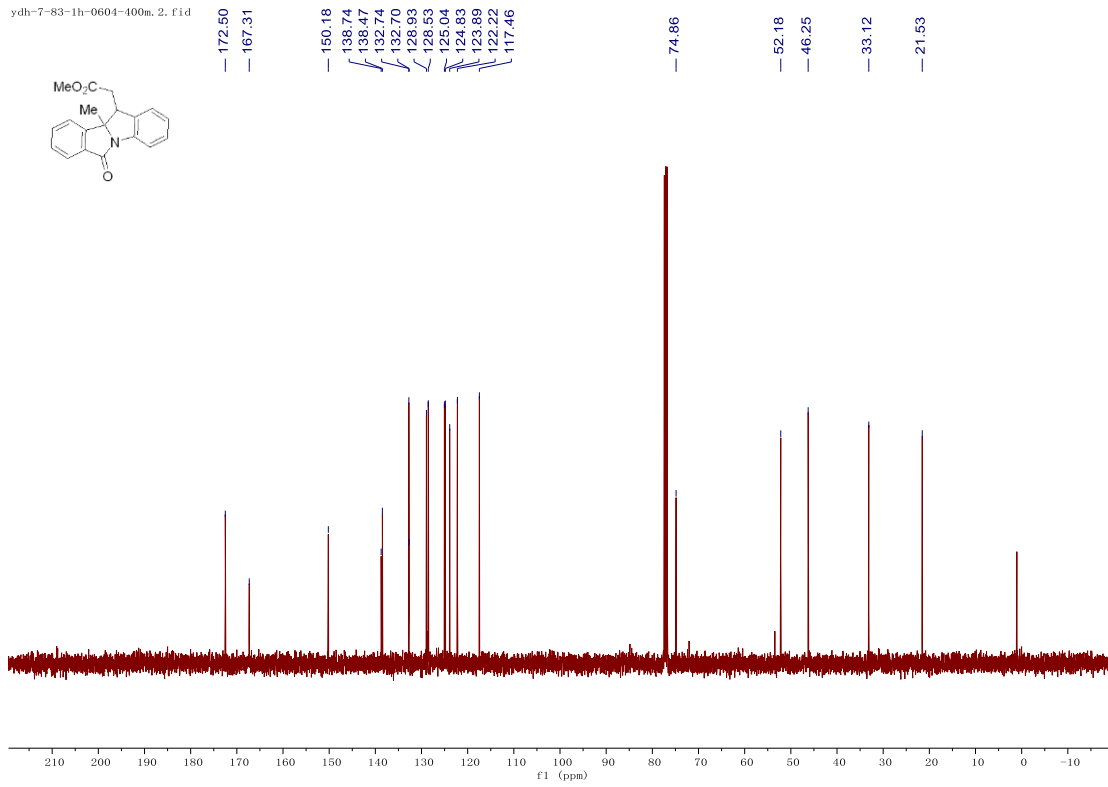

### <sup>1</sup>H NMR of 30

ydh-7-143-cyc-h-500m. 1.e2f

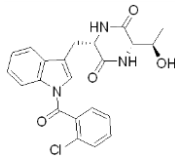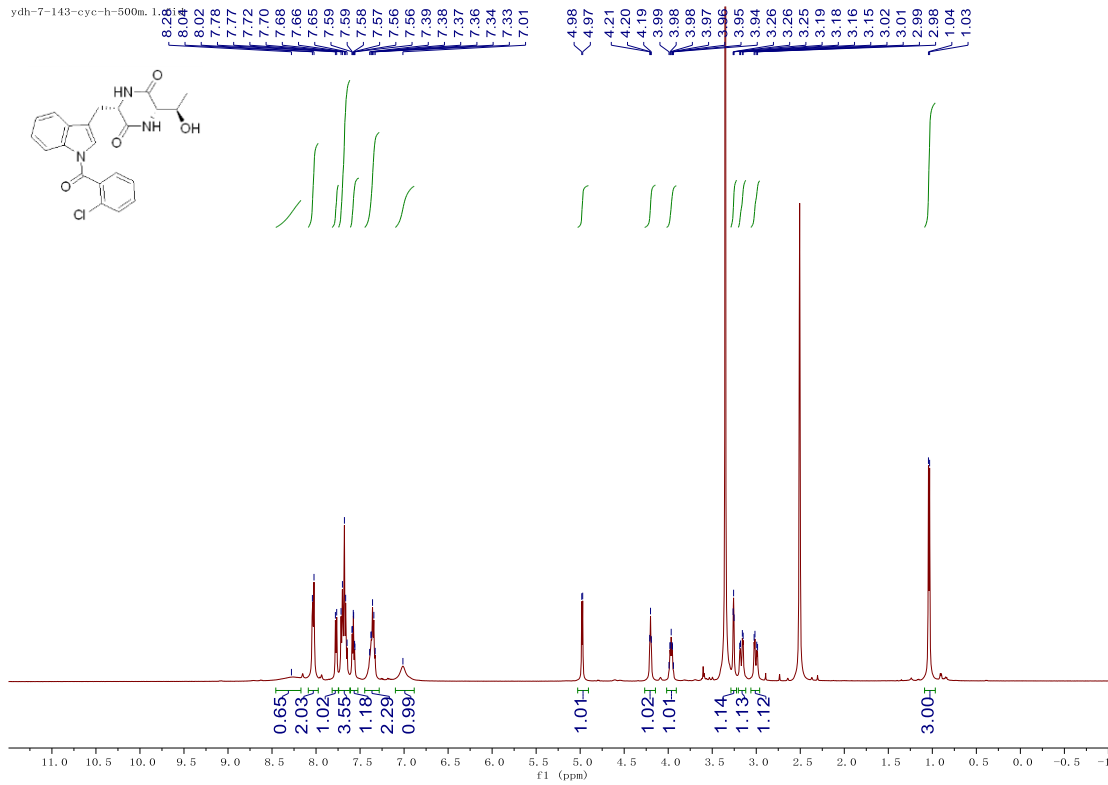

### <sup>13</sup>C NMR of 30

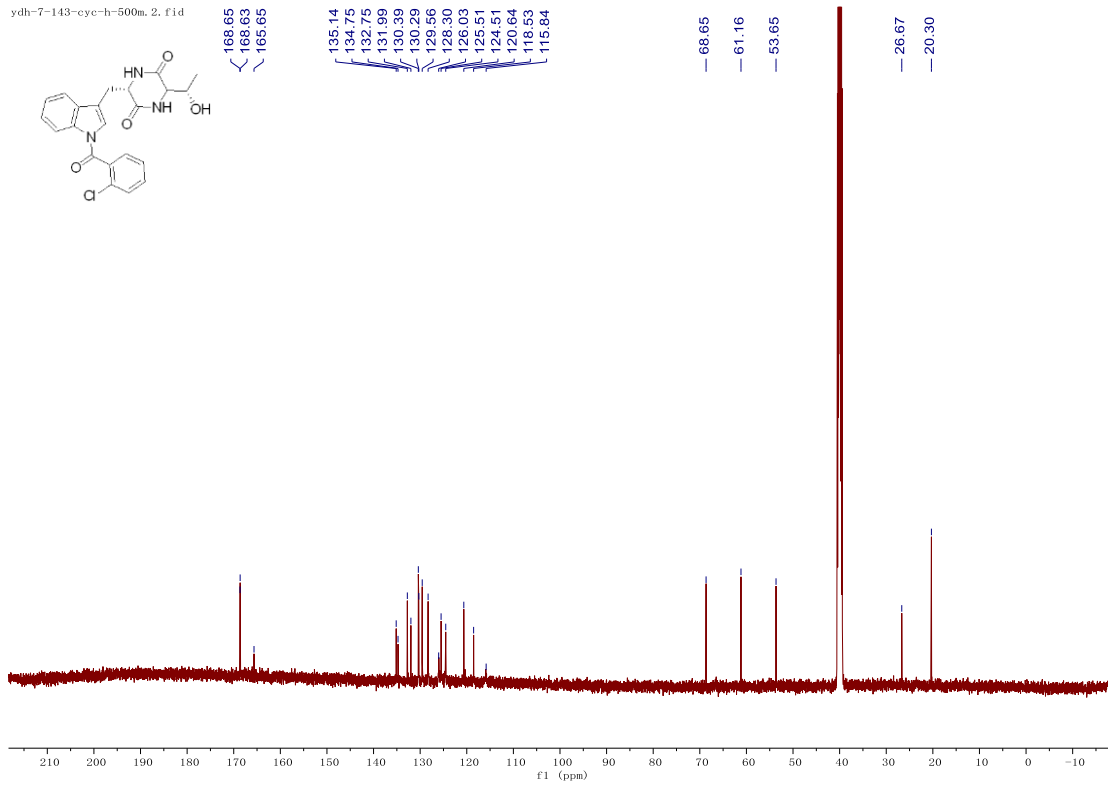

### <sup>1</sup>H NMR of 31

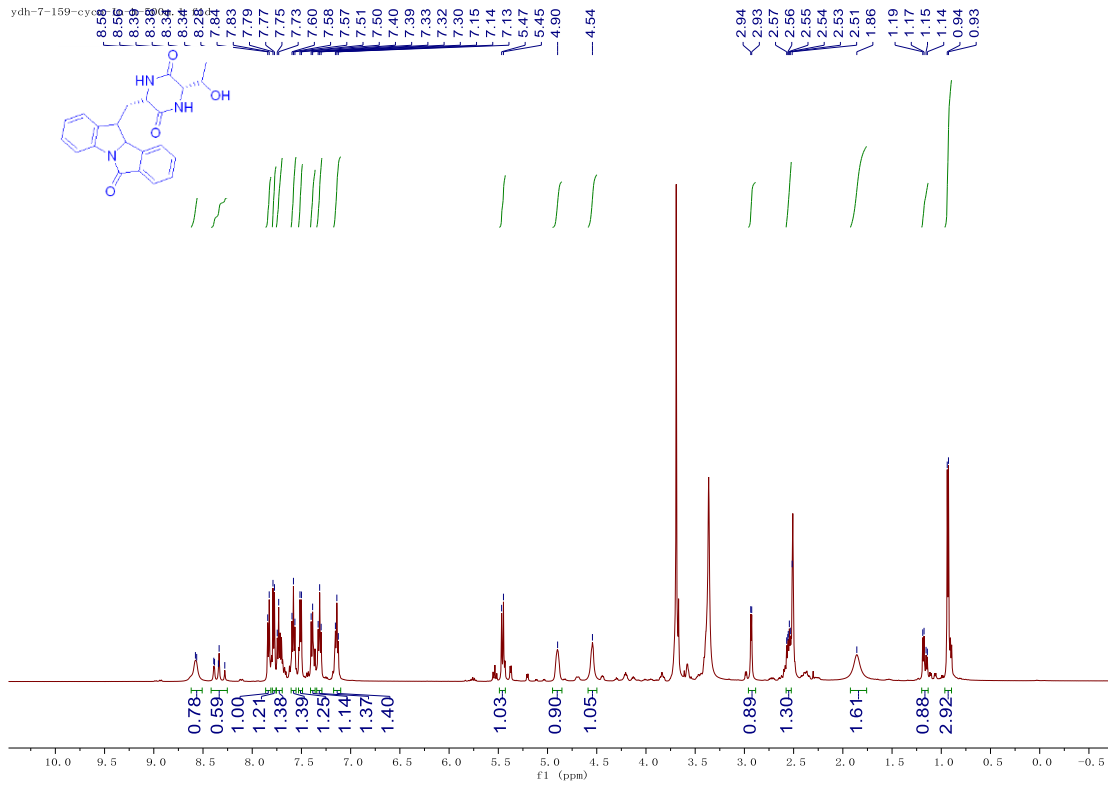

### <sup>13</sup>C NMR of 31

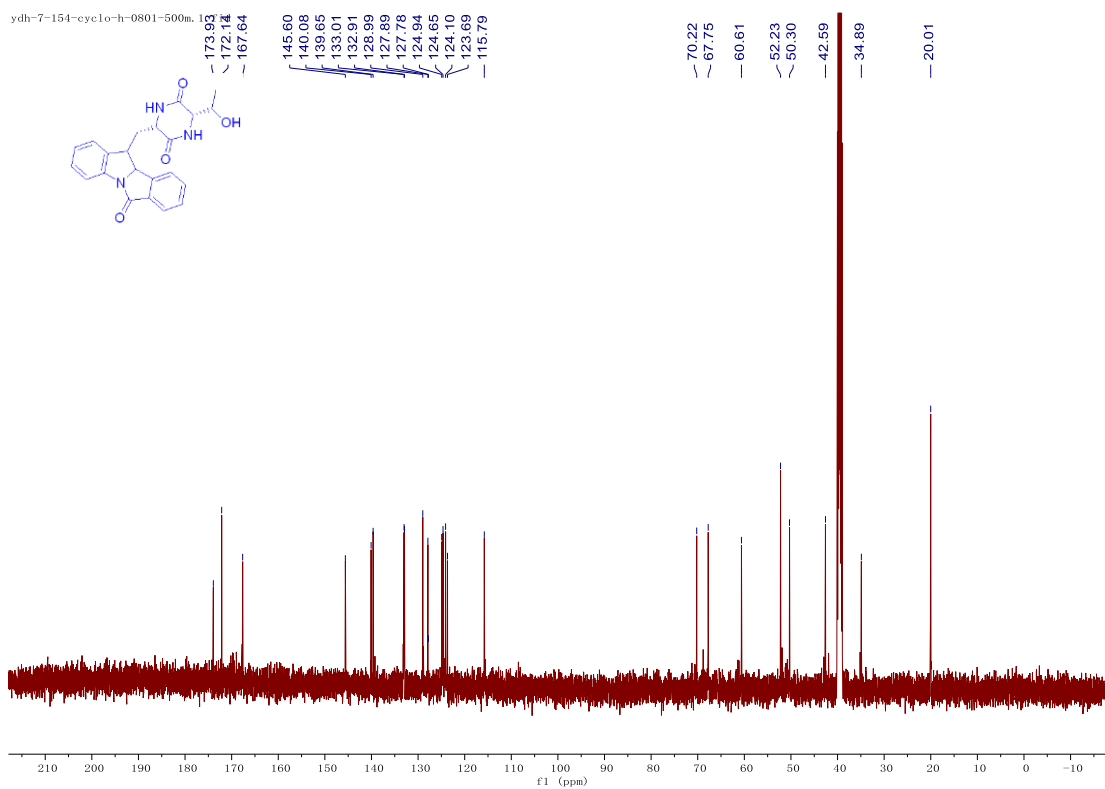

### <sup>1</sup>H NMR of 32

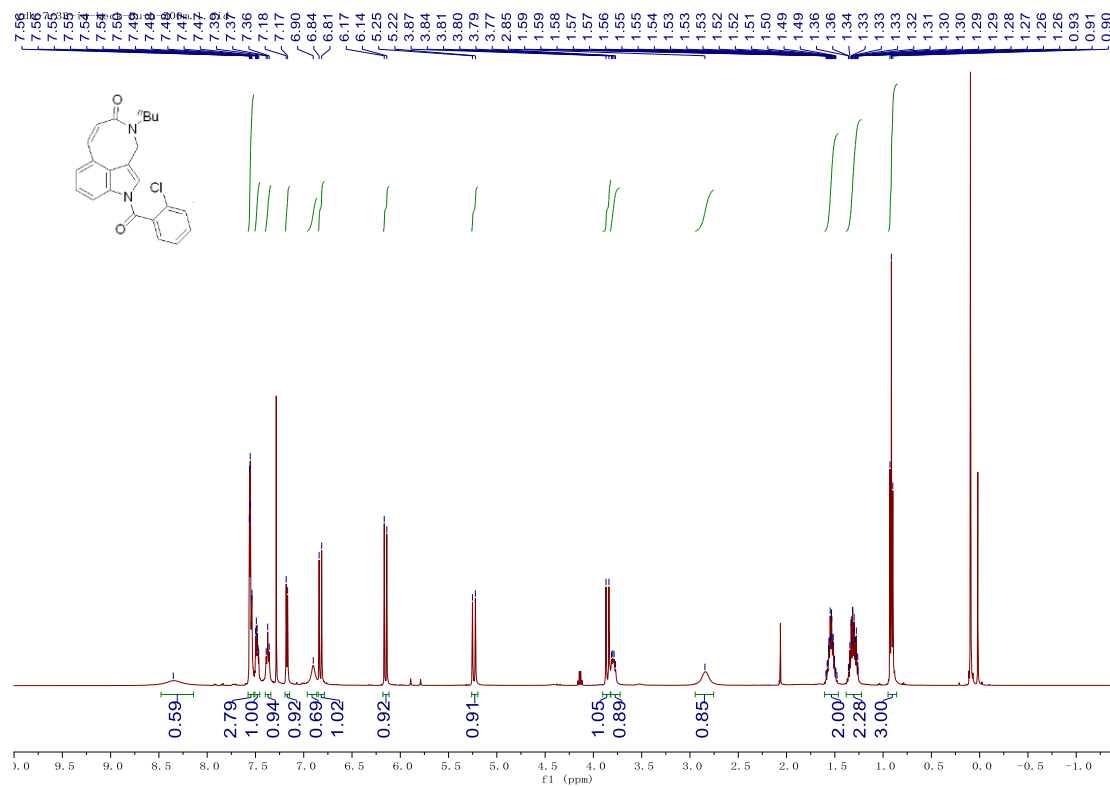

### <sup>13</sup>C NMR of 32

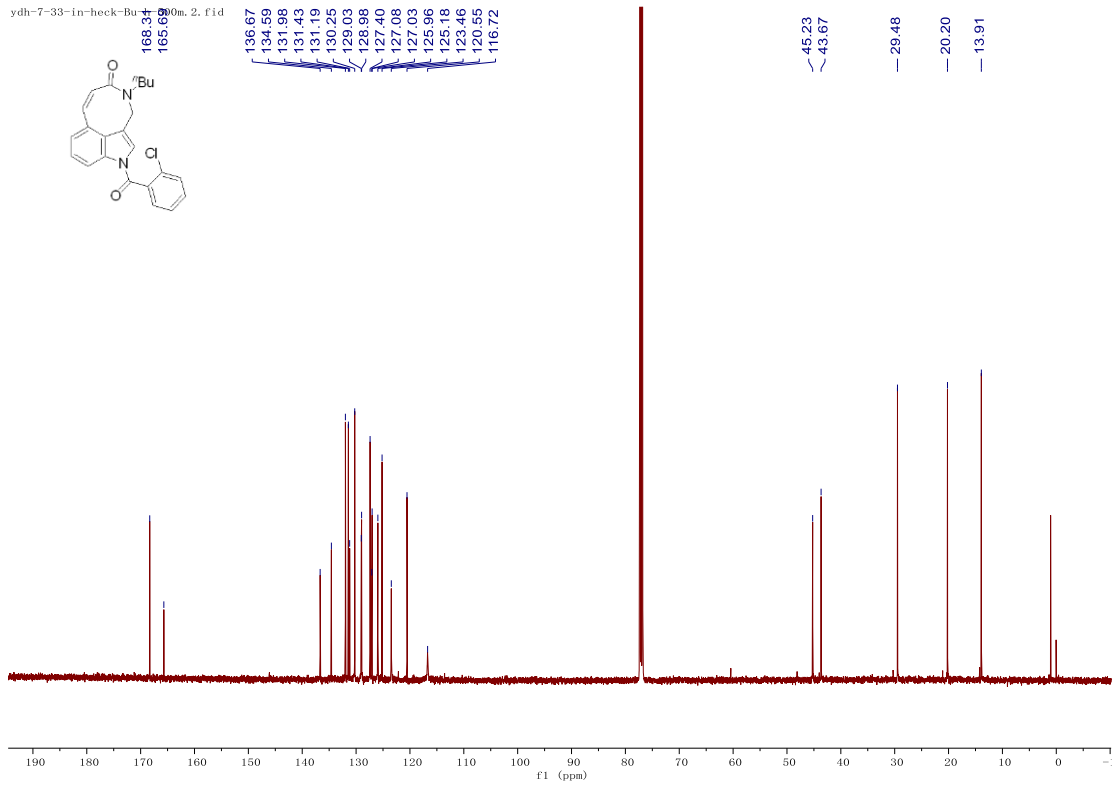

### <sup>1</sup>H NMR of 33

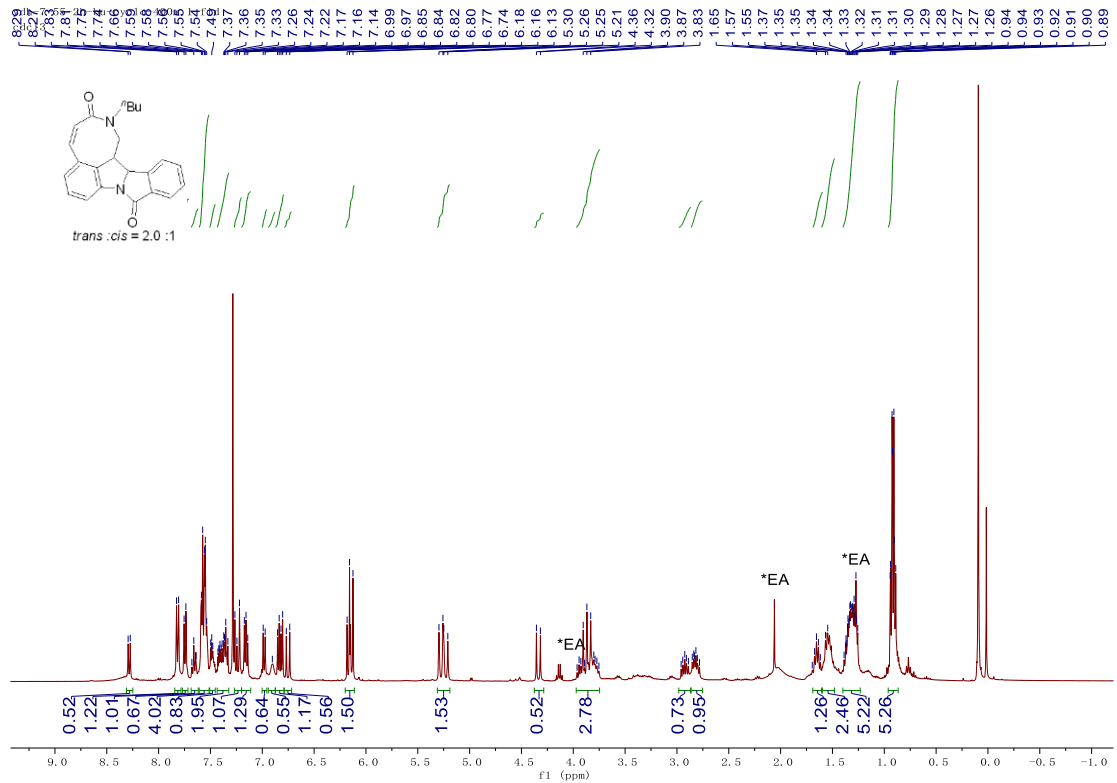

### <sup>13</sup>C NMR of 33

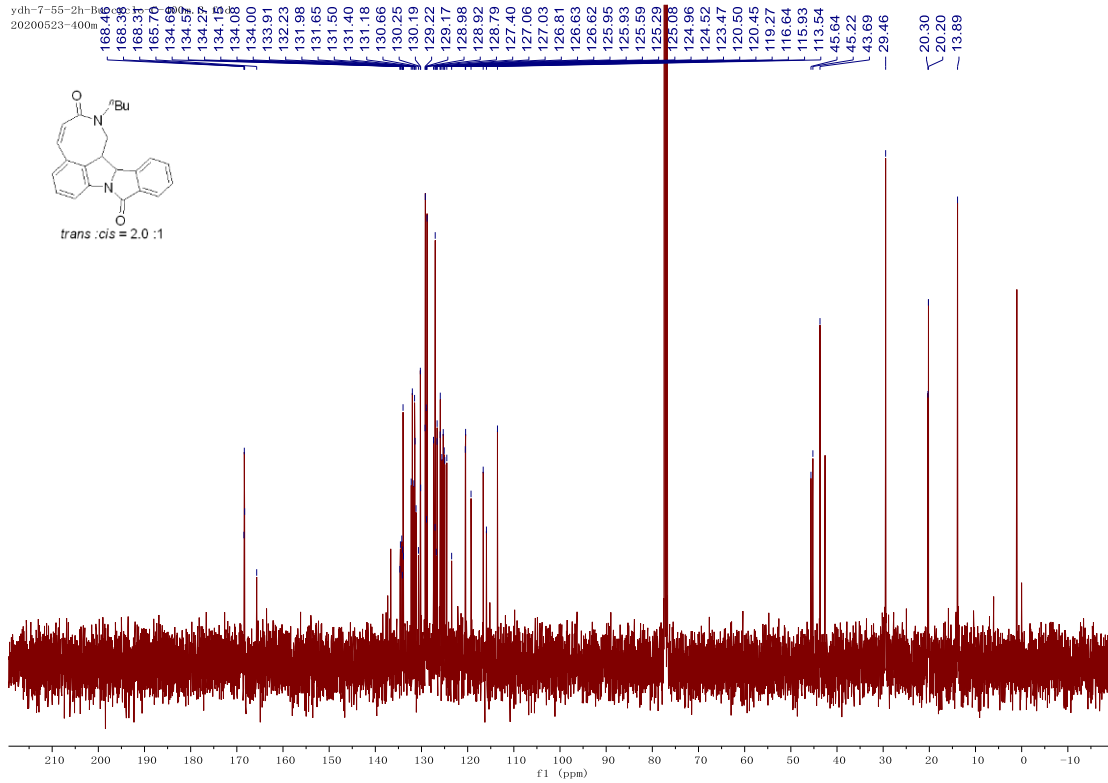

### <sup>1</sup>H NMR of trans-34

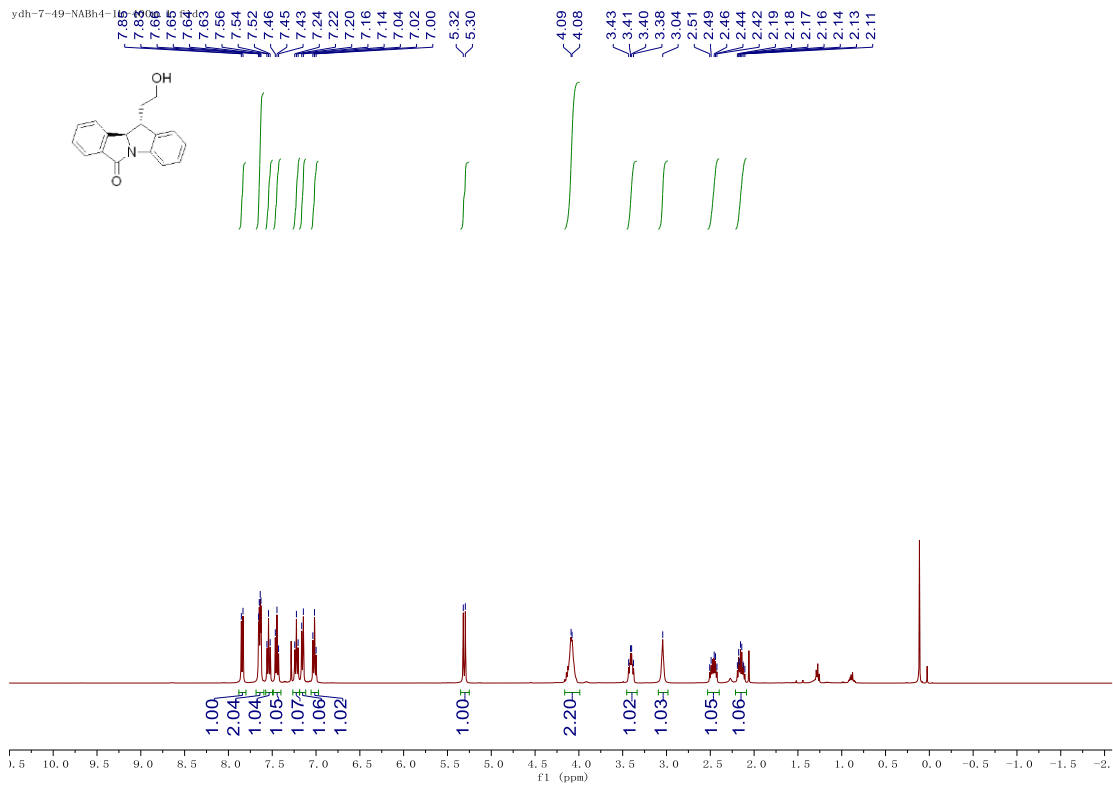



### <sup>13</sup>C NMR of *trans*-34

ydh-7-49-NABh4-1h-400m, 2, f1.d

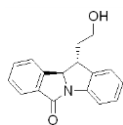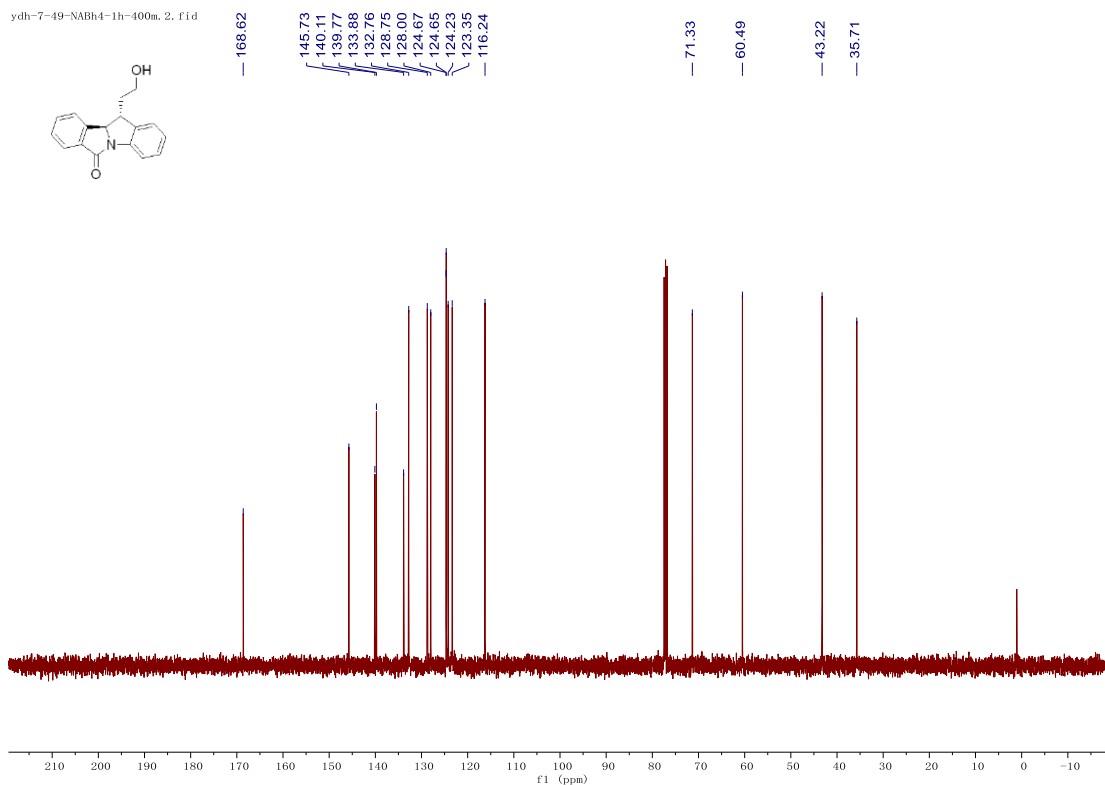

### <sup>1</sup>H NMR of *cis*-34 (contains a minor amount of *trans*-34)

ydh-7-49-2h-500m, 2, f1.d

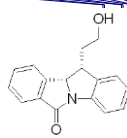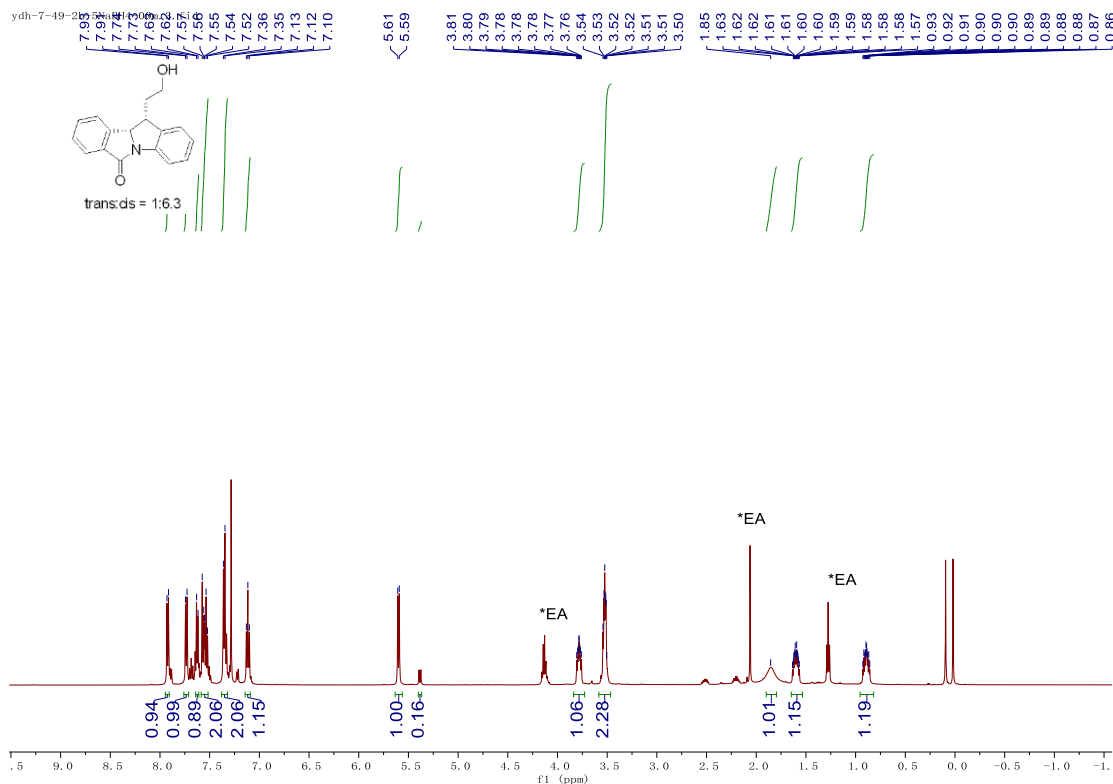

### <sup>13</sup>C NMR of *cis*-34 (contains a minor amount of *trans*-34)

ydh-7-49-2h-5NaBH4-00m. 4. f1.d

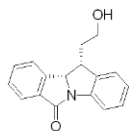

trans:ds = 1:6.3

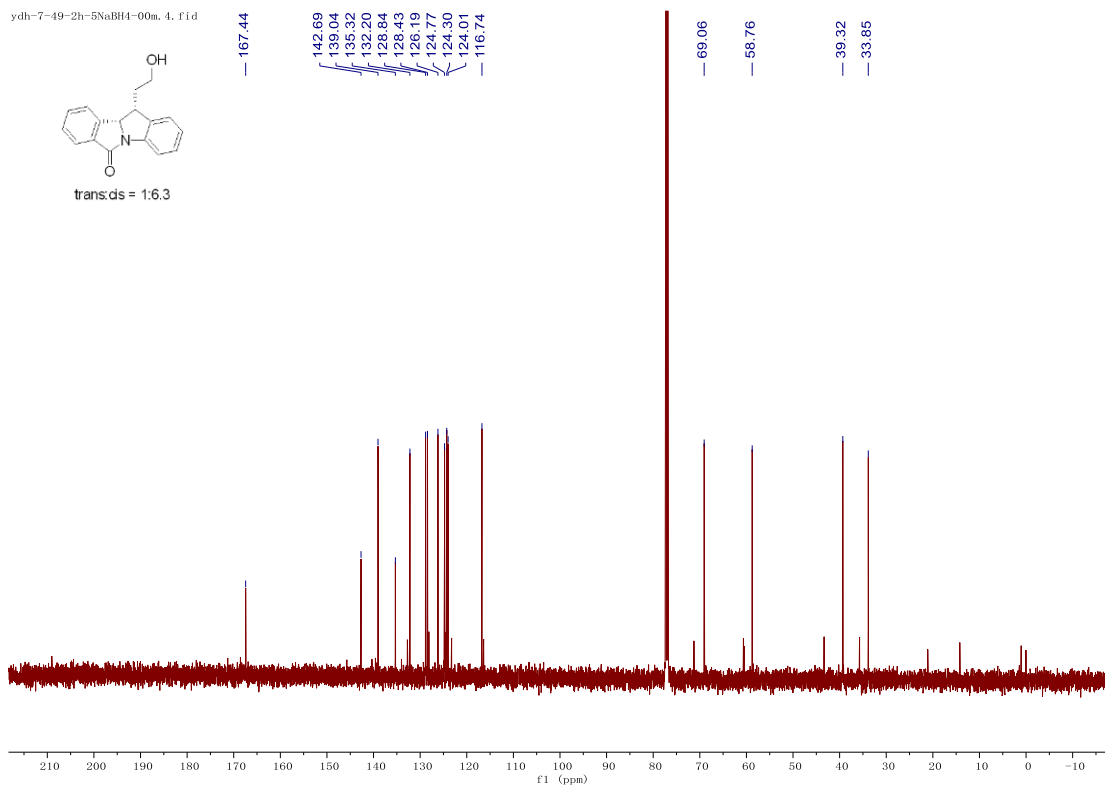

### <sup>1</sup>H NMR of 35

ydh-7-150-LAH-2h-0111-400m. 3

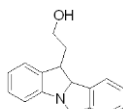

trans: ds = 6.0: 1

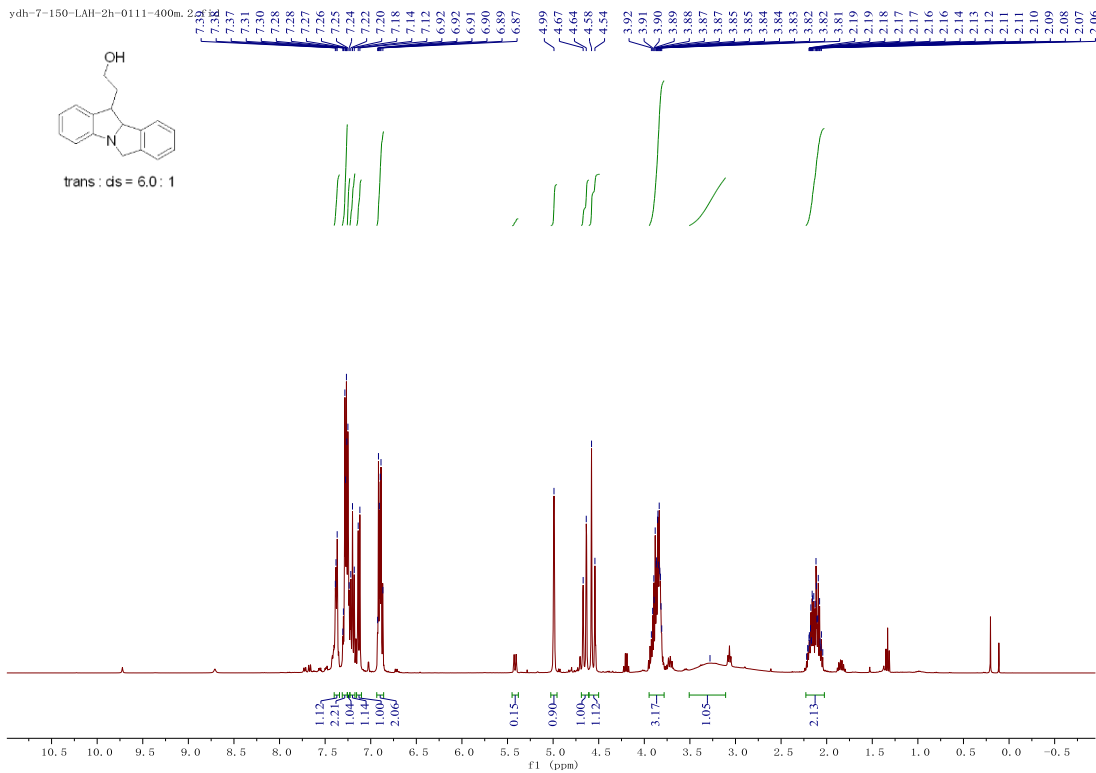

### <sup>13</sup>C NMR of 35

ydh-7-150-LAH-2h-0111-400m, 3. f1

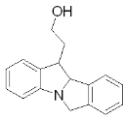

trans : cis = 6.0 : 1

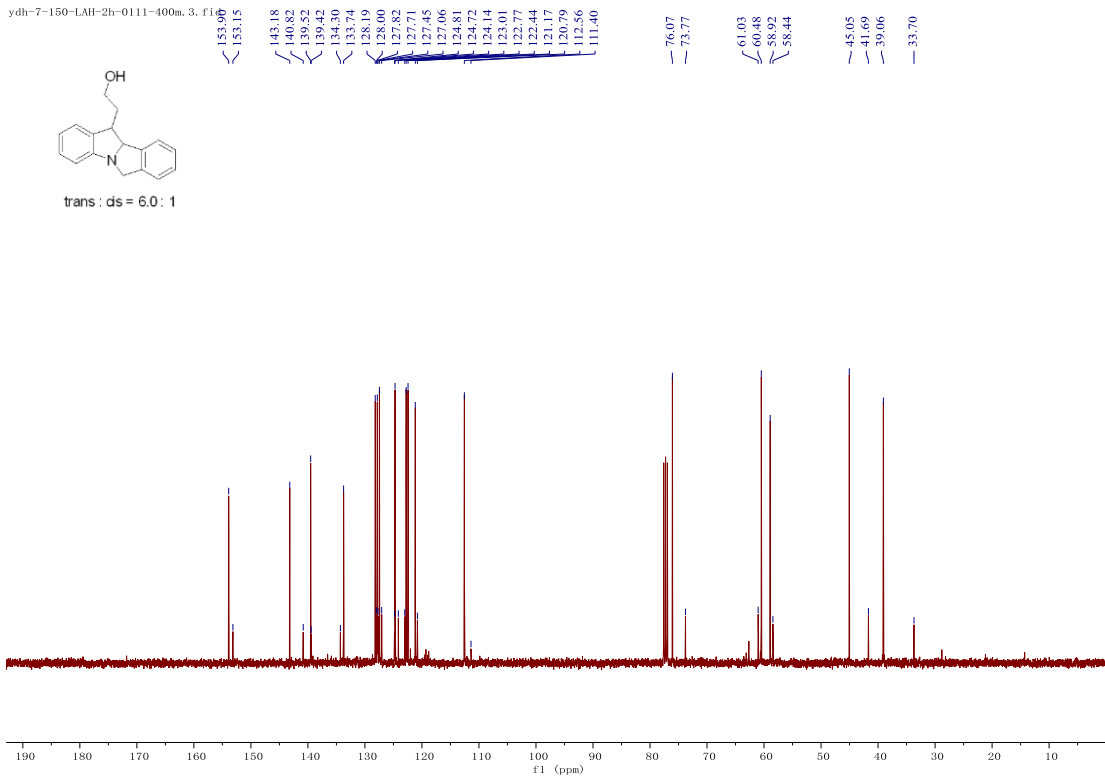

### <sup>1</sup>H NMR of 36

ydh-7-82-N3-h-400m, 2. f1d  
20200512-400m

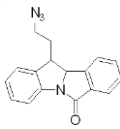

trans : cis = 16.7 : 1

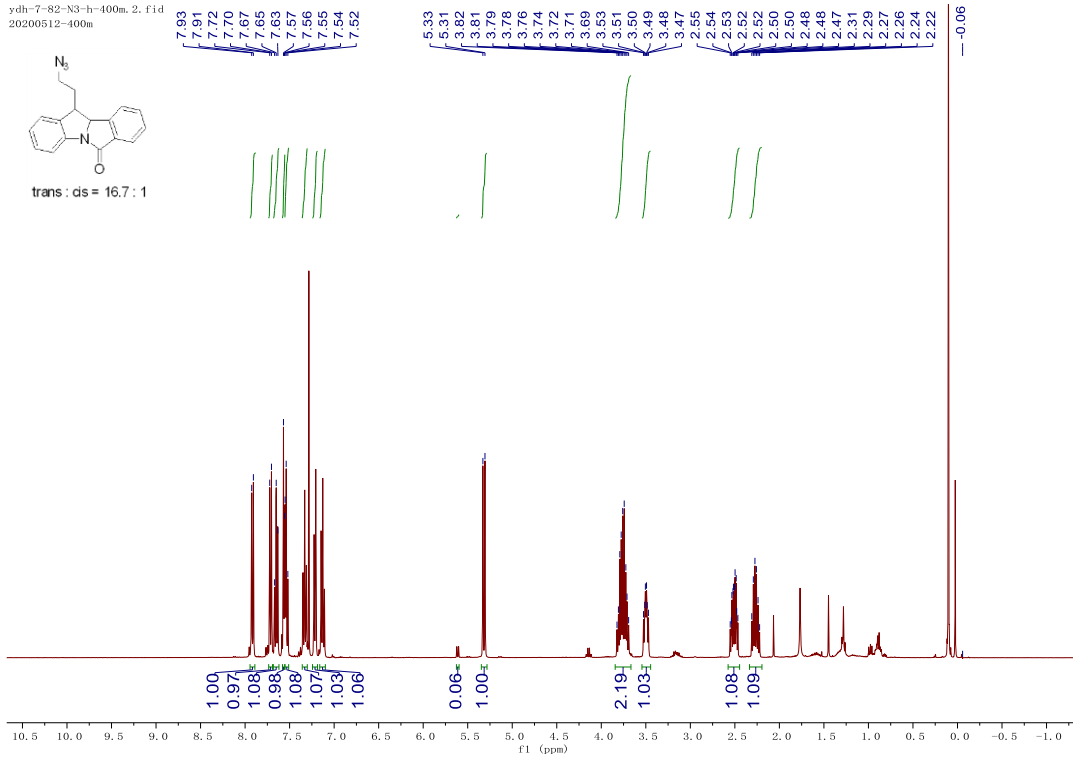

### <sup>13</sup>C NMR of 36

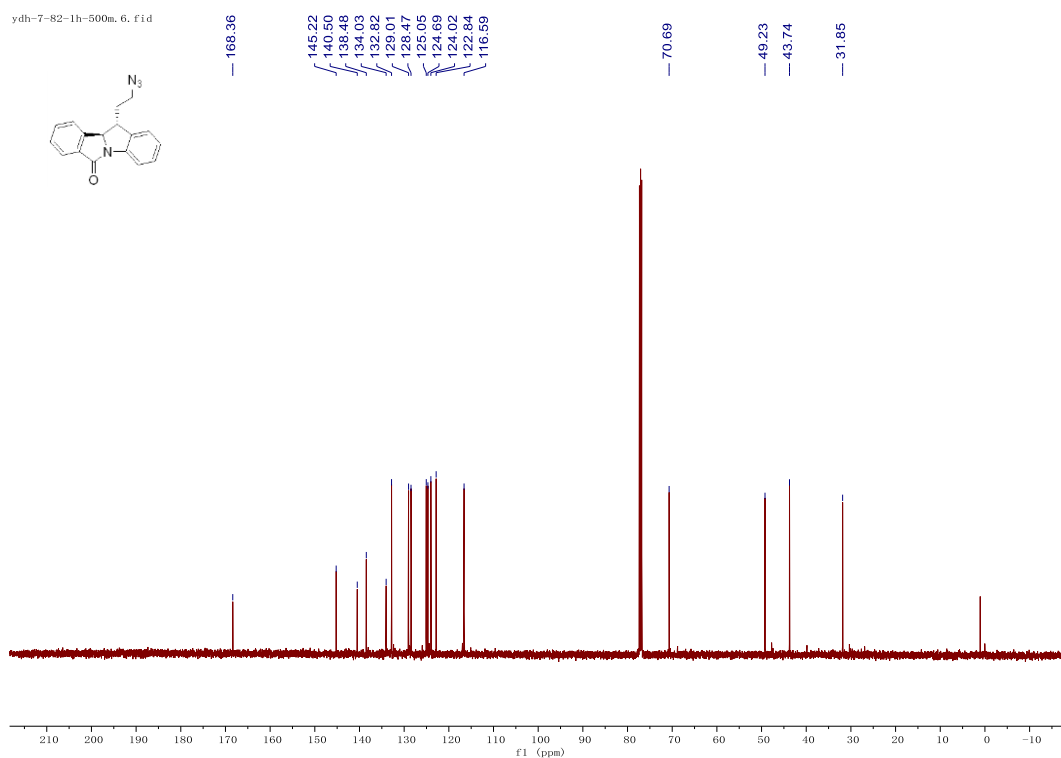

### <sup>1</sup>H NMR of 37

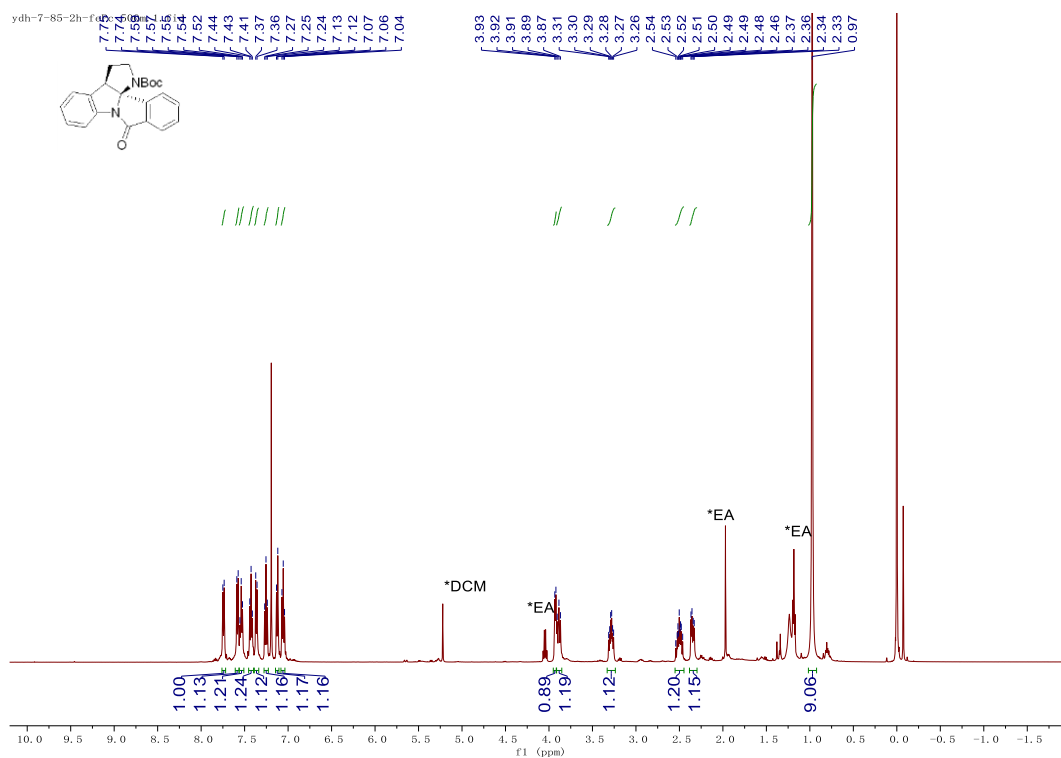

### <sup>13</sup>C NMR of 37

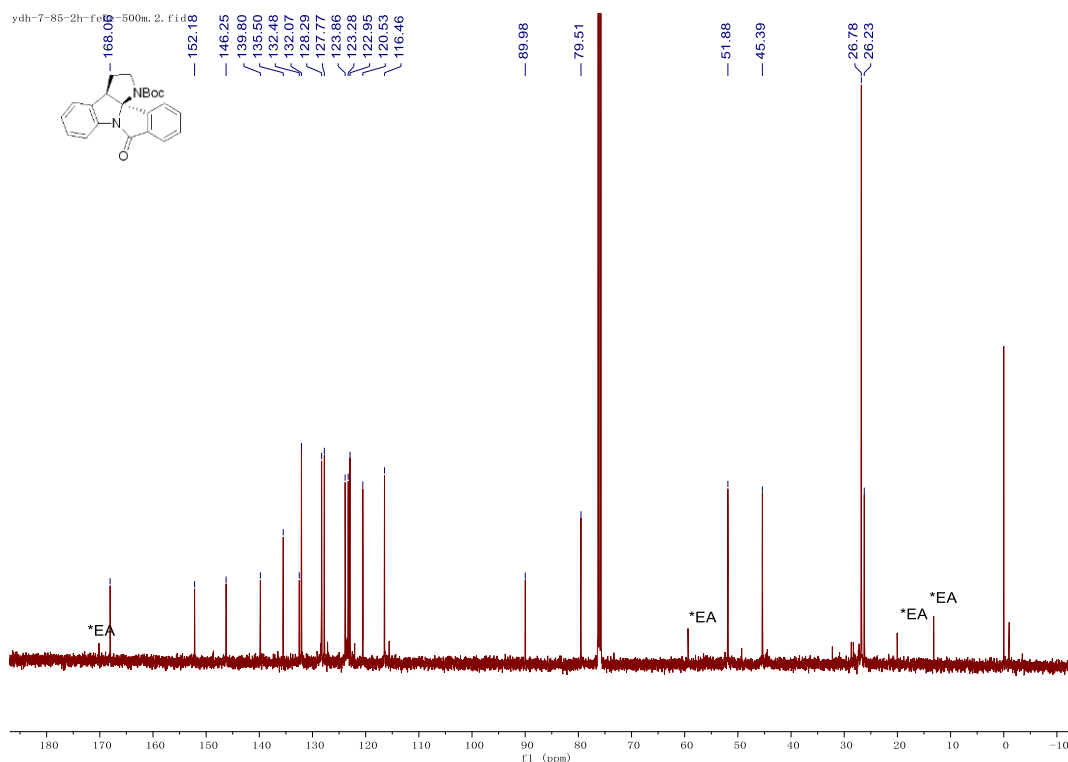

### <sup>1</sup>H NMR of 38

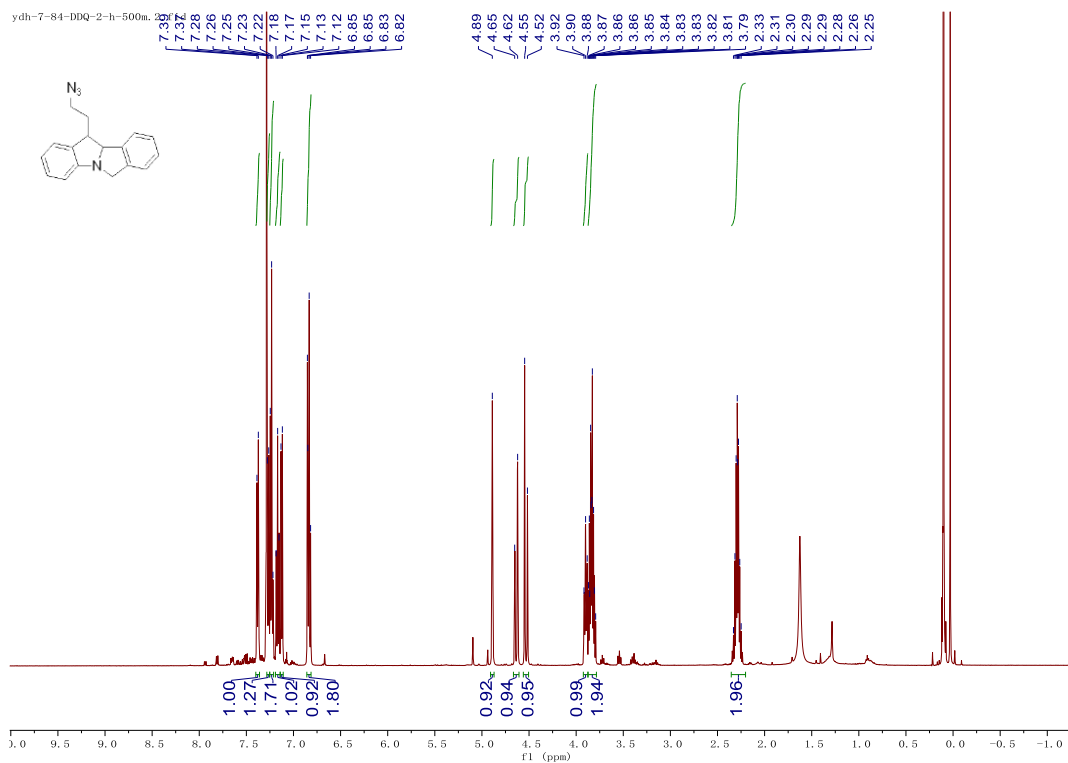

### <sup>13</sup>C NMR of 38

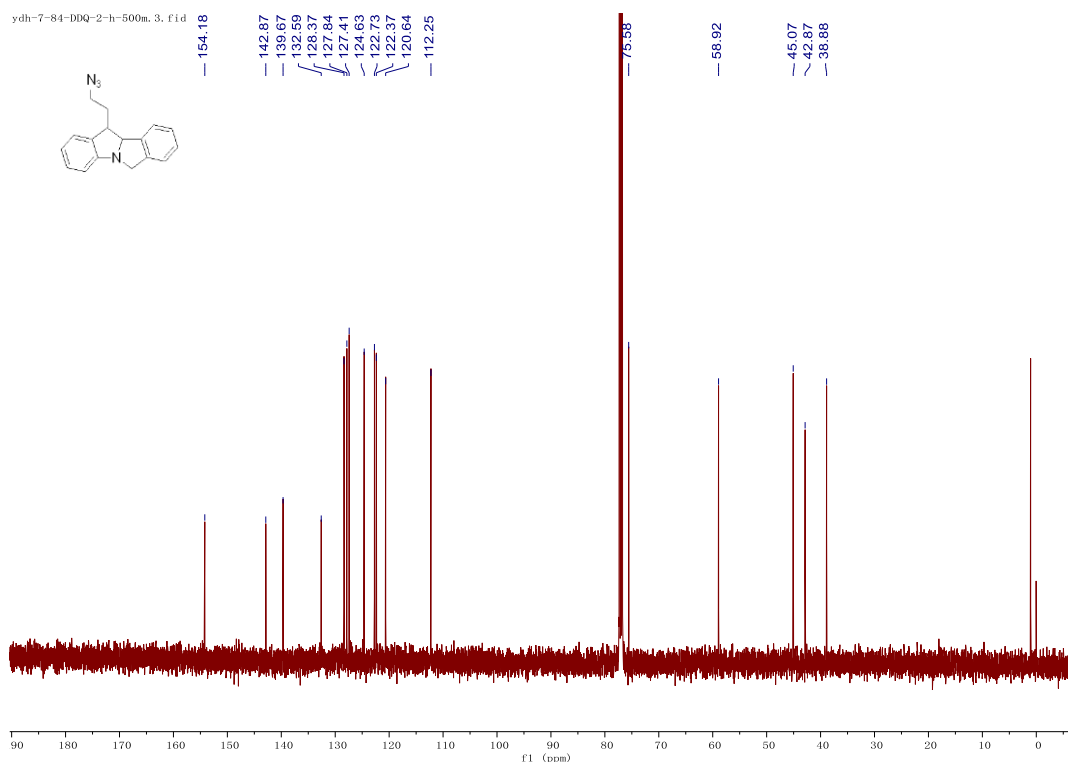

### <sup>1</sup>H NMR of 39

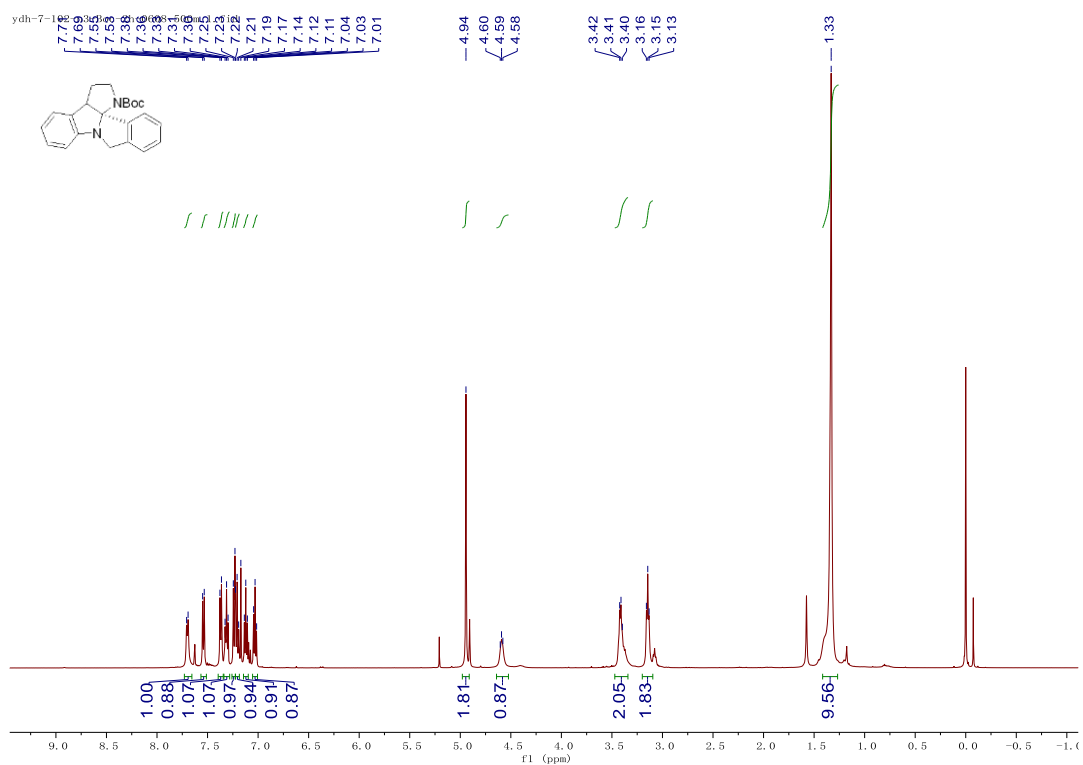

### <sup>13</sup>C NMR of 39

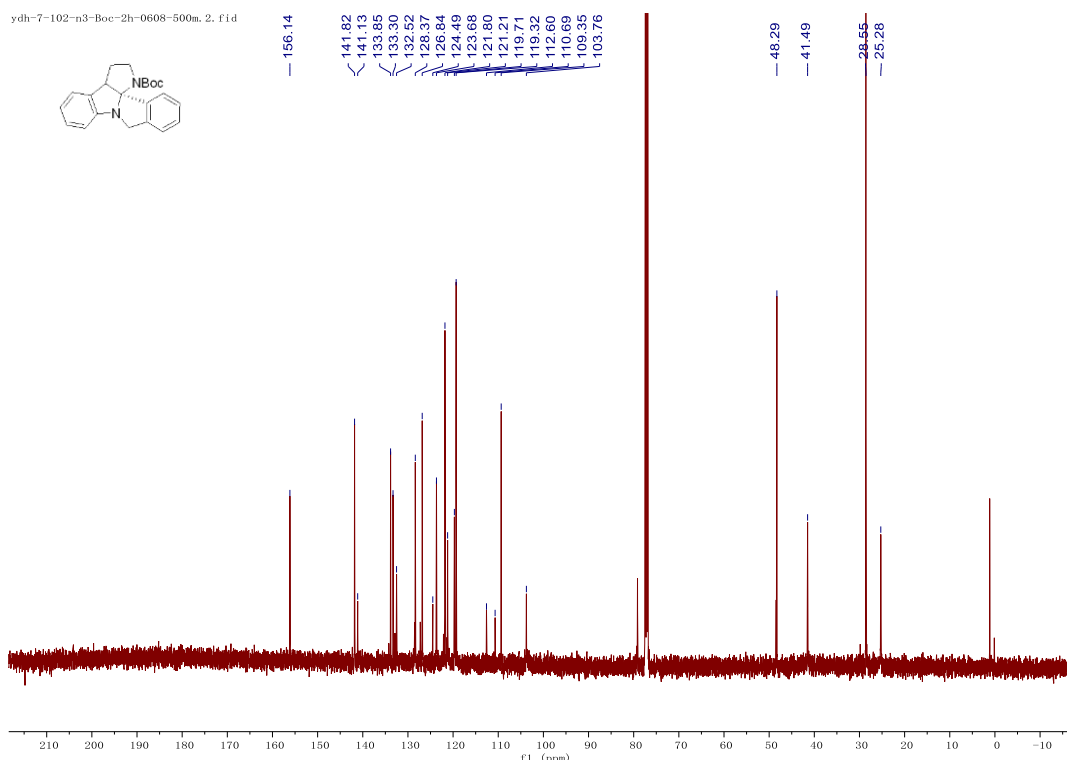

### <sup>1</sup>H NMR of 41

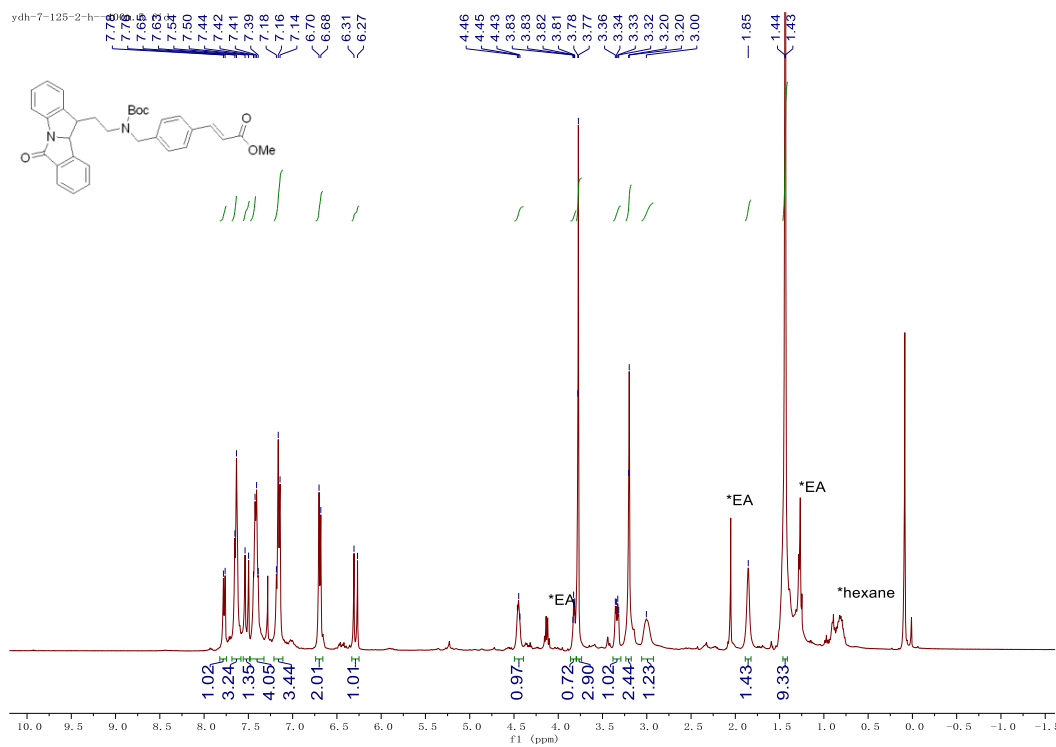

### <sup>13</sup>C NMR of 41

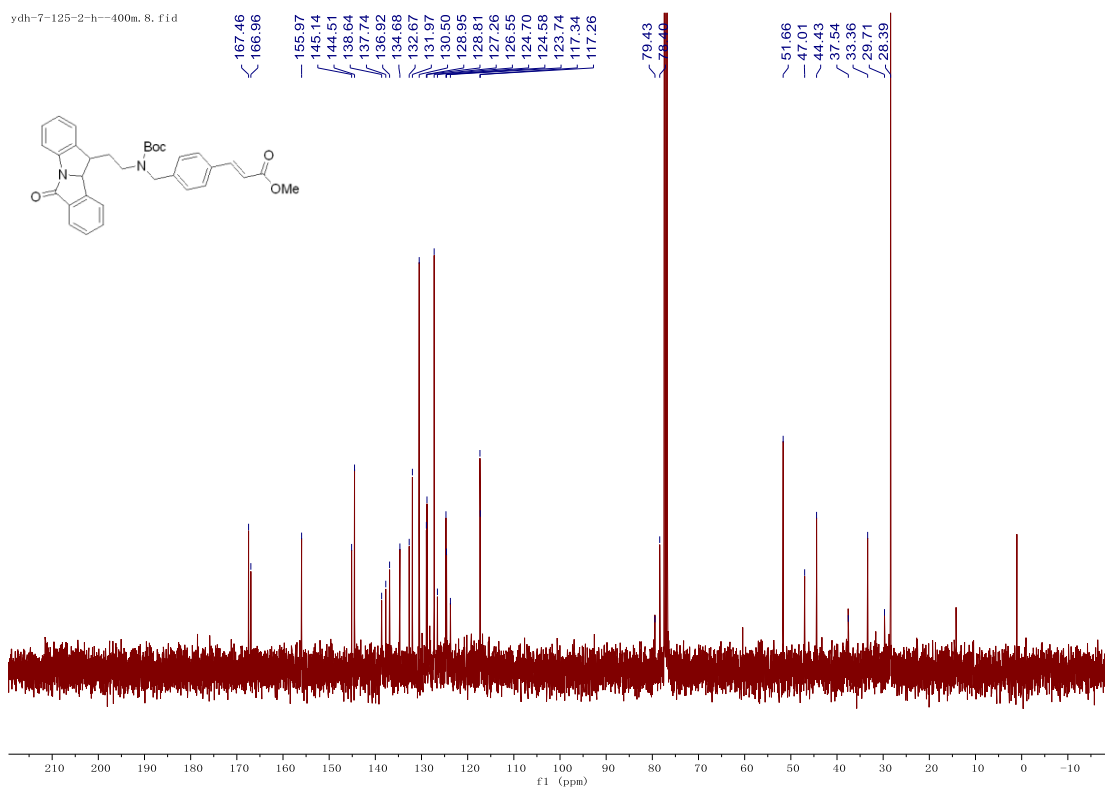

### <sup>1</sup>H NMR of 42

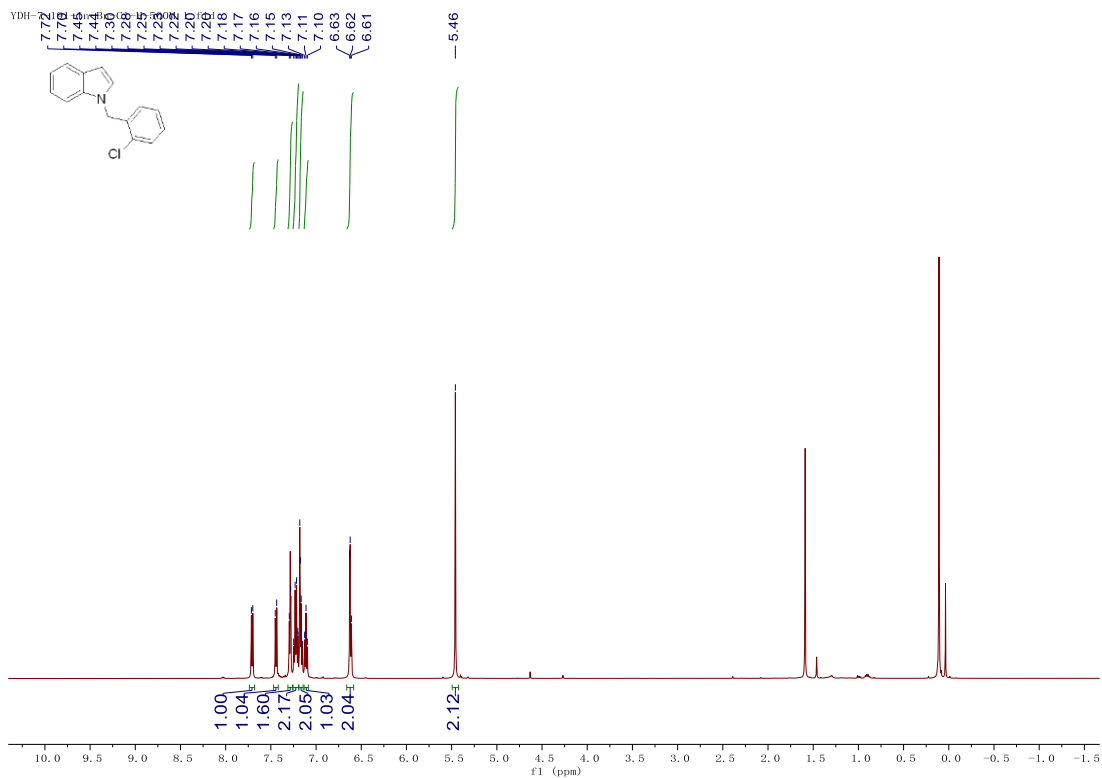



### <sup>13</sup>C NMR of 42

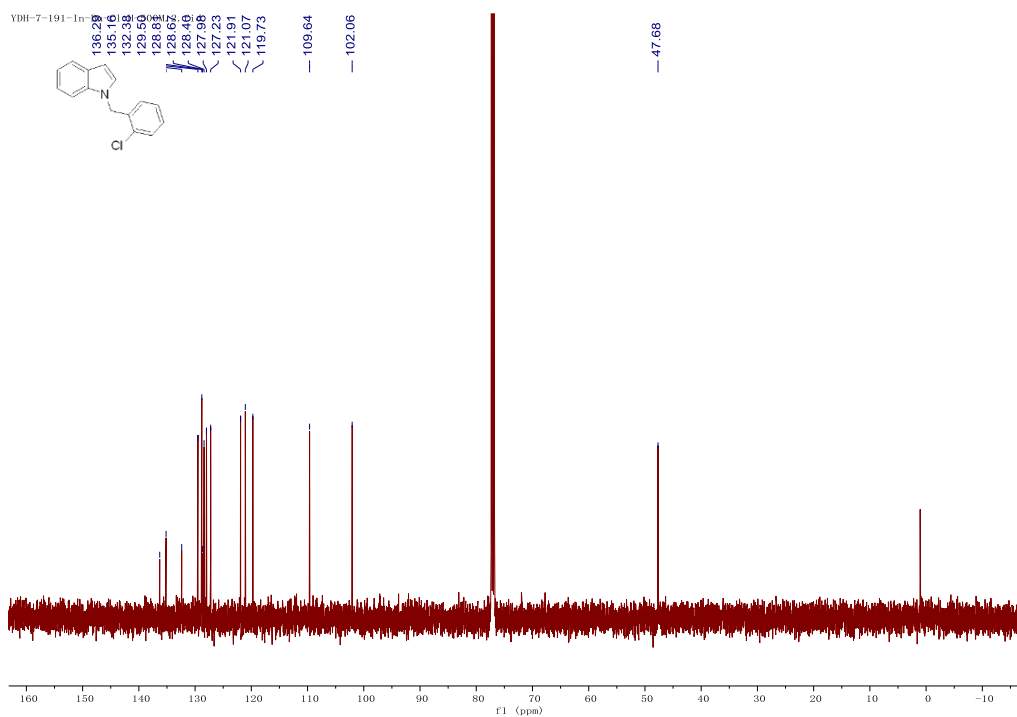

### <sup>1</sup>H NMR of 44 and 45

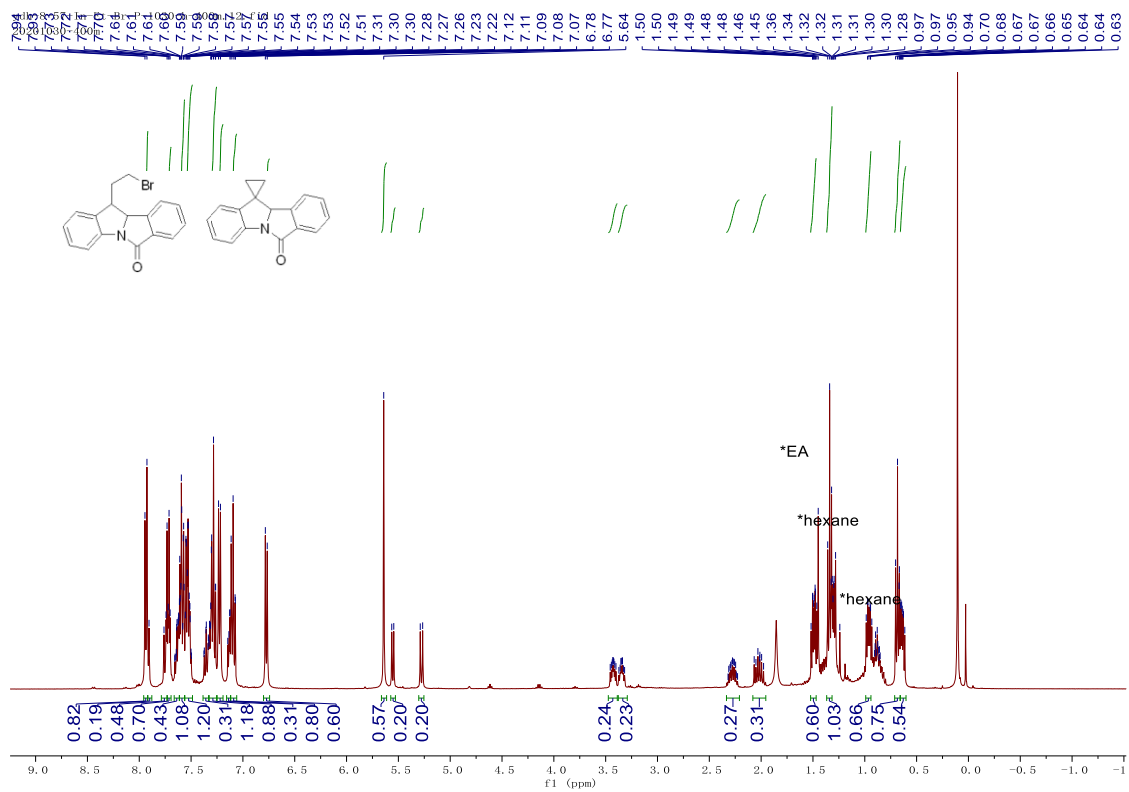

# <sup>13</sup>C NMR of 44 and 45

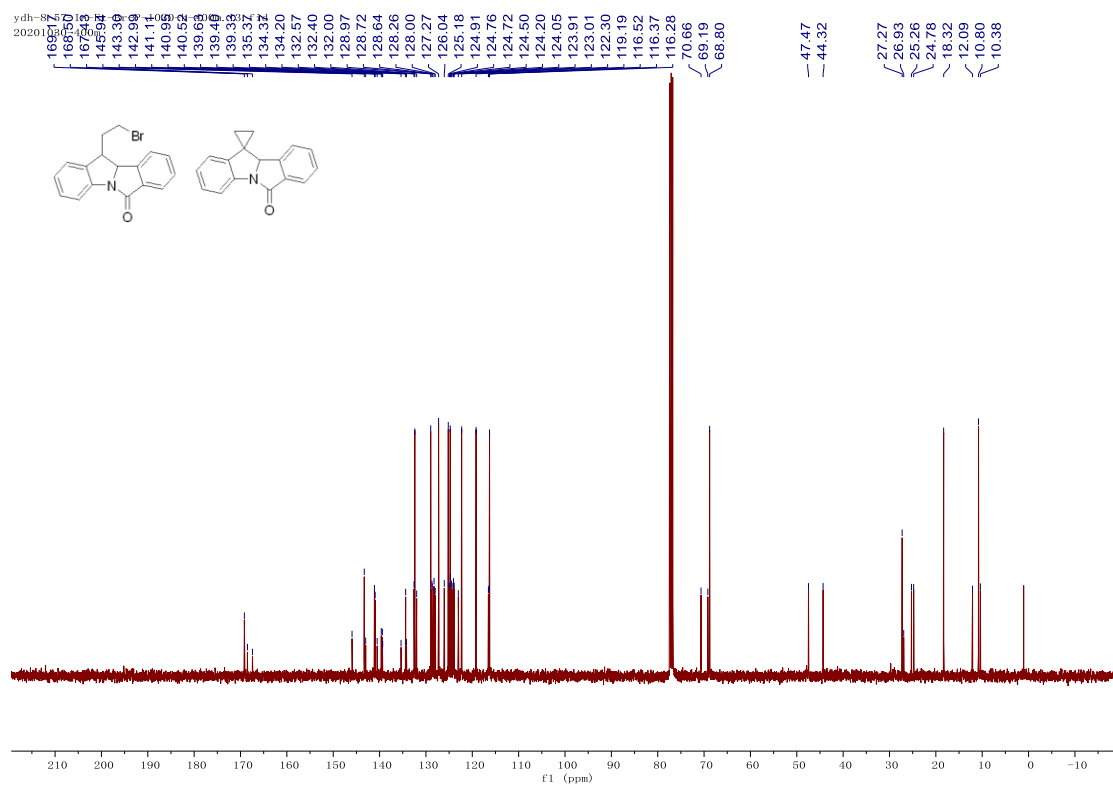

## Reference

- [1] H. M. O'Brien, M. Manzotti, R. D. Abrams, D. Elorriaga, H. A. Sparkes, S. A. Davis and R. B. Bedford, *Nat. Catal.*, 2018, **1**, 429.
- [2] J. Zeng, Z. Zhang, Q. Zhu, Z. Jiang and G. Zhong, *Molecules*, 2020, **25**, 1189.
- [3] S. Brown, S. Clarkson, R. Grigg, W. A. Thomas, V. Sridharan and D. M. Wilson, *Tetrahedron.*, 2001, **57**, 1347.
- [4] M. Bhuyan and B. Koenig, *Chem. Commun.*, 2012, **48**, 7489.
- [5] A. M. Signori, E. Latocheski, B. L. Albuquerque, D. Faggion, T. B. Bisol, L. Meiera and J. B. Domingos, *New J. Chem.*, 2015, **39**, 1574.
- [6] J. E. Macor and M. E. Newman, *Tetrahedron Lett.*, 1991, **32**, 3345.
- [7] D. A. Petrone, A. Yen, N. Zeidan and M. Lautens, *Org. Lett.*, 2015, **17**, 4838.
- [8] X.-H. Shan, H.-X. Zheng, B. Yang, L. Tie, J.-L. Fu, J.-P. Qu and Y.-B. Kang, *Nat. Commun.*, 2019, **10**, 908.
- [9] C. G. Hatchard and C. A. Parker, *Proc. R. Soc. London, Ser. A*, 1956, **235**, 518.
- [10] A. de Meijere, V. Chaplinski, F. Gerson, P. Merstetter and E. Haselbach, *J. Org. Chem.* **1999**, *64*, 6951.
- [11] A. R. Forrester, Organic N-Centered Radicals and Nitroxide Radicals · Part 1, Landolt-Börnstein - Group II Molecules and Radicals 9C1, **1979**, Springer-Verlag Berlin Heidelberg.
- [12] G. J. Barbante, N. Kebede, C. M. Hindson, E. H. Doeven, E. M. Zammit, G. R. Hanson, C. F. Hogan and P. S. Francis, *Chem – Eur. J.* 2014, **20**, 14026.
- [13] a) Y. L. Chow, W. C. Danen, S. F. Nelsen and D. H. Rosenblatt, *Chemical Reviews* **1978**, *78*, 243-274. b) W. Miao, J.-P. Choi and A. J. Bard, *J. Am. Chem. Soc.* 2002, **124**, 14478.
- [14] a) G. R. Buettner, *Free Radical Biology and Medicine* 1987, **3**, 259-303; b) K. Makino, T. Hagiwara and A. Murakami, *Int. J. Radiat. Appl. Instrum Part C. Radiat. Phys. Chem.* 1991, **37**, 657.
- [15] D. A. Petrone, A. Yen, N. Zeidan and M. Lautens, *Org. Lett.*, 2015, **17**, 4838.
- [16] (a) I. Moldvai, E. Temesvári-Major, M. Incze, É. Szentirmay, E. Gács-Baitz and C. Szántay, *J. Org. Chem.*, 2004, **69**, 5993; (b) M. Ruiz, P. López-Alvarado and J. C. Menéndez, *Eur. J. Org. Chem.*, 2013, 2802.
- [17] E. De Vita, P. Schüler, S. Lovell, J. Lohbeck, S. Kullmann, E. Rabinovich, A. Sananes, B. Heßling, V. Hamon, N. Papo, J. Hess, E. W. Tate, N. Gunkel and A. K. Miller, *J. Med. Chem.*, 2018, **61**, 8859.
- [18] C. G. Hatchard and C. A. Parker, *Proc. R. Soc. London, Ser. A*, 1956, **235**, 518.
- [19] M. Frisch, G. Trucks, H. Schlegel, G. Scuseria, M. Robb, J. Cheeseman, G. Scalmani, V. Barone, B. Mennucci and G. Petersson, *Inc.: Wallingford CT* 2010.
- [20] C. Adamo and V. Barone, *J. Chem. Phys.*, 1999, **110**, 6158.
- [21] S. Grimme, J. Antony, S. Ehrlich and H. Krieg, *J. Chem. Phys.*, 2010, **132**, 154104.
- [22] (a) M. J. Frisch, J. A. Pople and J. S. Binkley, *J. Chem. Phys.*, 1984, **80**, 3265; (b) L. Radom, P. Hariharan, J. Pople and P. Schleyer, *J. Am. Chem. Soc.*, 1973, **95**, 6531.
- [23] O. V. Dolomanov, L. J. Bourhis, R. J. Gildea, J. A. K. Howard and H. Puschmann, *J. Appl. Cryst.*, 2009, **42**, 339.
- [24] G. M. Sheldrick *Acta Cryst.*, 2015, **A71**, 3
- [25] G. M. Sheldrick *Acta Cryst.*, 2015, **C71**, 3
